# Supplementary material for: Expression profile, molecular functions, and prognostic significance of miRNAs in primary colorectal cancer stem cells
Source: Aging (Albany NY). 2021 Apr 1;13(8):12067–85. doi: 10.18632/aging.202914 (PMC8109135; doi:10.18632/aging.202914)
Supplement: Supplementary Table 1 [file aging-13-202914-s002.xlsx]

## Sheet: mirnaDiff_Copy_1.0
Supplementary Table 1. The differentially expressed miRNAs between pCRCSCs and pCRCSCs-derived differentiation cells.
id	logFC	AveExpr	t	P.Value	adj.P.Val	B
hsa-miR-1185-2-3p	-5.9462	1.99075	-64.7097	2.76734e-07	4.3575e-05	-23.9275
hsa-miR-1227	2.35289	0.175965	5.62023	0.00468356	0.0450106	-36.0077
hsa-miR-1246	1.17491	7.9115	12.3827	0.000221392	0.00415771	-32.2447
hsa-miR-125a-5p	1.11733	5.67795	6.42013	0.00285426	0.031078	-35.4017
hsa-miR-129-1-3p	1.10883	0.253061	5.72477	0.00437604	0.0432742	-35.9247
hsa-miR-1307-5p	-3.56022	1.31016	-9.60105	0.000605534	0.00859638	-33.4911
hsa-miR-140-5p	1.05992	2.8048	7.5563	0.00153577	0.0187126	-34.64
hsa-miR-142-3p	1.37469	1.78009	7.47883	0.00159775	0.0193526	-34.6887
hsa-miR-1470	5.04176	1.23476	6.26549	0.00312791	0.0331753	-35.5139
hsa-miR-1471	-6.39593	1.90586	-34.0551	3.75321e-06	0.000256094	-27.1746
hsa-miR-181a-5p	1.08146	4.85988	6.15286	0.00334765	0.0345804	-35.5971
hsa-miR-182-5p	3.6234	0.0453965	8.15089	0.00114668	0.0145792	-34.2799
hsa-miR-183-5p	1.31348	4.89237	13.4355	0.000159908	0.00337455	-31.841
hsa-miR-18b-3p	3.81474	0.00114647	12.4193	0.000218802	0.00415771	-32.2301
hsa-miR-196b-5p	5.95442	-0.802738	23.4262	1.70831e-05	0.000794752	-29.061
hsa-miR-1972	-5.9293	2.58437	-74.5557	1.55593e-07	3.23845e-05	-23.2102
hsa-miR-1973	-1.14741	7.64232	-13.0404	0.000180136	0.00365088	-31.9888
hsa-miR-200c-5p	2.12551	-1.09163	6.92707	0.00214119	0.0243501	-35.0488
hsa-miR-2116-3p	1.01739	3.96749	8.92831	0.000804682	0.010696	-33.8426
hsa-miR-223-3p	1.37583	2.75746	17.5856	5.43335e-05	0.00184446	-30.5
hsa-miR-2276	-6.15299	1.99657	-49.9571	7.92045e-07	9.35001e-05	-25.2372
hsa-miR-3137	-5.60624	2.12181	-38.7095	2.23174e-06	0.000175707	-26.5273
hsa-miR-3150b-5p	4.8033	0.613481	5.65997	0.00456363	0.0444845	-35.976
hsa-miR-3180-5p	1.50299	2.80962	7.57832	0.0015187	0.0186232	-34.6262
hsa-miR-3190-5p	1.55392	2.80867	15.0358	0.000101934	0.00260824	-31.2819
hsa-miR-338-3p	-5.74762	-0.151129	-19.6686	3.46101e-05	0.00131494	-29.9393
hsa-miR-338-5p	2.22955	-1.07121	5.71213	0.00441189	0.043419	-35.9347
hsa-miR-345-5p	-4.84484	0.546057	-9.55875	0.000616119	0.00860853	-33.5125
hsa-miR-3613-3p	1.25851	2.77019	10.4532	0.000433302	0.00677076	-33.0769
hsa-miR-3614-5p	1.34272	3.19334	20.8003	2.76165e-05	0.00115369	-29.6585
hsa-miR-3620	4.54928	0.281203	5.63828	0.00462862	0.0449042	-35.9932
hsa-miR-3676-5p	-1.29819	8.98503	-7.61641	0.0014897	0.018594	-34.6025
hsa-miR-3682-3p	-3.57797	1.46345	-9.58739	0.000608928	0.00859638	-33.498
hsa-miR-3692-5p	-6.03183	2.40278	-104.845	3.88926e-08	1.59226e-05	-21.4831
hsa-miR-3911	-6.03021	1.76106	-74.728	1.54139e-07	3.23845e-05	-23.1985
hsa-miR-3940-3p	6.43606	-0.942896	39.3826	2.0809e-06	0.000170384	-26.4402
hsa-miR-4257	-1.15726	4.06508	-13.0606	0.000179029	0.00365088	-31.9812
hsa-miR-4312	1.38444	2.75305	11.7601	0.000271791	0.00478359	-32.499
hsa-miR-4323	1.40711	0.985983	9.26878	0.000695173	0.0094868	-33.6618
hsa-miR-4428	-1.26641	7.25763	-20.1302	3.15186e-05	0.00125063	-29.8229
hsa-miR-4430	-1.16627	5.51563	-24.5208	1.42021e-05	0.000709068	-28.8311
hsa-miR-4436b-5p	1.10202	3.78578	11.5156	0.000295426	0.00495686	-32.6024
hsa-miR-4455	6.47419	-0.20456	37.4856	2.5426e-06	0.000192767	-26.6897
hsa-miR-4478	-1.03447	5.28104	-40.3248	1.89046e-06	0.000168132	-26.3206
hsa-miR-4481	-4.87737	-0.320639	-83.8423	9.65355e-08	2.82297e-05	-22.6156
hsa-miR-4486	-5.34561	2.02837	-32.0028	4.82929e-06	0.000308924	-27.4885
hsa-miR-4487	-6.13715	2.54208	-85.0574	9.1049e-08	2.82297e-05	-22.5427
hsa-miR-4488	-5.36607	0.734817	-27.4927	8.93809e-06	0.000494877	-28.2548
hsa-miR-4498	-6.3406	2.59613	-130.861	1.57884e-08	1.55802e-05	-20.3601
hsa-miR-4538	-6.30059	1.99648	-47.4423	9.76963e-07	9.99922e-05	-25.4986
hsa-miR-4636	-4.73286	-0.636443	-65.435	2.64475e-07	4.3575e-05	-23.871
hsa-miR-4640-3p	5.04738	0.611978	5.99564	0.00368691	0.0371778	-35.7152
hsa-miR-4646-3p	1.50122	2.26876	12.8235	0.000192595	0.00382758	-32.0718
hsa-miR-4647	-5.45964	0.633031	-48.6484	8.82241e-07	9.50499e-05	-25.3715
hsa-miR-4652-3p	1.48033	2.00701	8.67086	0.000901904	0.0119109	-33.9835
hsa-miR-4656	-1.18396	4.31941	-13.7227	0.000146949	0.00323655	-31.7361
hsa-miR-4666b	1.02875	3.63227	10.2924	0.000460627	0.00703659	-33.1526
hsa-miR-4667-5p	-5.82127	2.32483	-112.945	2.87352e-08	1.55802e-05	-21.1061
hsa-miR-4672	-1.03235	6.29141	-15.3692	9.33546e-05	0.00248178	-31.1727
hsa-miR-4673	-4.57483	0.206027	-10.3772	0.00044596	0.00691577	-33.1126
hsa-miR-4690-5p	-4.74214	0.447404	-9.01841	0.000773741	0.010352	-33.7942
hsa-miR-4721	-1.34911	6.68805	-19.0135	3.96746e-05	0.00142481	-30.1091
hsa-miR-4728-3p	1.36911	2.51741	17.2606	5.85685e-05	0.00184446	-30.5933
hsa-miR-4728-5p	-1.183	6.15679	-23.5667	1.66749e-05	0.000793803	-29.0309
hsa-miR-4743	-4.39849	0.884462	-6.18076	0.0032915	0.034376	-35.5764
hsa-miR-4746-3p	-1.00508	5.50859	-6.23577	0.00318413	0.0334252	-35.5358
hsa-miR-4758-5p	-6.50178	1.89352	-33.3798	4.07087e-06	0.000268809	-27.2757
hsa-miR-4767	1.05044	3.07556	10.9131	0.000365517	0.00580011	-32.8662
hsa-miR-4769-3p	1.29889	2.55812	13.6838	0.000148625	0.00323655	-31.7502
hsa-miR-4778-5p	-5.65809	1.61439	-22.7981	1.9067e-05	0.000848483	-29.1977
hsa-miR-483-3p	5.97612	-0.685212	41.5562	1.67312e-06	0.000155676	-26.1686
hsa-miR-484	1.24759	2.04365	9.97366	0.000521386	0.0076234	-33.306
hsa-miR-494	-1.71401	11.3511	-17.271	5.84261e-05	0.00184446	-30.5903
hsa-miR-500a-5p	2.86946	0.818442	8.48436	0.000981505	0.0127971	-34.0879
hsa-miR-5010-3p	1.92719	2.39327	16.5988	6.85382e-05	0.00199525	-30.7887
hsa-miR-509-3-5p	-4.27786	0.126736	-5.85518	0.00402622	0.0404003	-35.8229
hsa-miR-5096	-3.97126	-0.126405	-6.43436	0.00283059	0.0309851	-35.3915
hsa-miR-513a-5p	-1.22198	5.45363	-13.6136	0.000151712	0.003269	-31.7757
hsa-miR-516a-5p	-3.5968	-0.548368	-11.5607	0.000290879	0.00495686	-32.5832
hsa-miR-5194	-6.50561	2.13707	-111.352	3.04449e-08	1.55802e-05	-21.1781
hsa-miR-548ai	1.36364	3.03069	13.7307	0.000146608	0.00323655	-31.7332
hsa-miR-5585-3p	-1.32784	4.05486	-11.388	0.000308777	0.00505654	-32.6572
hsa-miR-563	1.12269	3.43073	29.7232	6.51602e-06	0.000381094	-27.8614
hsa-miR-564	-5.78049	1.9359	-53.1307	6.16689e-07	8.41575e-05	-24.9255
hsa-miR-574-5p	1.14669	5.57499	14.2439	0.000126599	0.00297872	-31.551
hsa-miR-584-5p	-3.93437	-0.426934	-7.25981	0.00179043	0.020943	-34.8288
hsa-miR-598	1.25228	1.33904	7.39349	0.00166964	0.0196487	-34.7429
hsa-miR-622	-5.96166	2.26775	-36.3549	2.87911e-06	0.000203226	-26.8445
hsa-miR-634	2.56645	0.991047	6.24125	0.00317368	0.0334252	-35.5317
hsa-miR-636	6.35431	-0.93959	36.5197	2.82674e-06	0.000203226	-26.8216
hsa-miR-642a-3p	-1.10895	8.81451	-9.03344	0.000768728	0.010352	-33.7861
hsa-miR-664b-3p	1.11392	2.13488	5.68075	0.00450242	0.0440979	-35.9595
hsa-miR-664-3p	6.22542	0.0377694	49.5	8.2218e-07	9.35001e-05	-25.2837
hsa-miR-671-3p	4.6026	-0.867588	6.77357	0.00233131	0.0260775	-35.1533
hsa-miR-671-5p	-6.09637	2.26954	-57.2528	4.55187e-07	6.65548e-05	-24.5473
hsa-miR-766-3p	1.22564	3.0864	17.3747	5.70353e-05	0.00184446	-30.5604
hsa-miR-92b-3p	1.0365	3.45604	20.6587	2.83884e-05	0.00116222	-29.6928
hsa-miR-99b-5p	1.14603	4.83216	8.36451	0.00103726	0.0133539	-34.1561
