# Supplementary material for: Expression profile, molecular functions, and prognostic significance of miRNAs in primary colorectal cancer stem cells
Source: Aging (Albany NY). 2021 Apr 1;13(8):12067–85. doi: 10.18632/aging.202914 (PMC8109135; doi:10.18632/aging.202914)
Supplement: Supplementary Table 2 [file aging-13-202914-s003.xlsx]

## Sheet: Target
Supplementary Table 2. Predictive target genes of pCRCSC-related miRNAs in different databases.
miRNA	MIMATid	Gene	EntrezID	RefseqID	miRWalk	miRDB	Targetscan	SUM
hsa-miR-1185-2-3p	MIMAT0022713	A1CF	29974	NM_001198819	1	1	1	3
hsa-miR-1185-2-3p	MIMAT0022713	ABCA1	19	NM_005502	1	1	1	3
hsa-miR-1185-2-3p	MIMAT0022713	ABL2	27	NM_001168236	1	1	1	3
hsa-miR-1185-2-3p	MIMAT0022713	ACADSB	36	NM_001609	1	1	1	3
hsa-miR-1185-2-3p	MIMAT0022713	ACSL3	2181	NM_203372	1	1	1	3
hsa-miR-1185-2-3p	MIMAT0022713	ACVR1C	130399	NM_001111032	1	1	1	3
hsa-miR-1185-2-3p	MIMAT0022713	ADAM12	8038	NM_003474	1	1	1	3
hsa-miR-1185-2-3p	MIMAT0022713	ADAMTS5	11096	NM_007038	1	1	1	3
hsa-miR-1185-2-3p	MIMAT0022713	ADCY7	113	NM_001114	1	1	1	3
hsa-miR-1185-2-3p	MIMAT0022713	ADNP	23394	NM_015339	1	1	1	3
hsa-miR-1185-2-3p	MIMAT0022713	AFF4	27125	NM_014423	1	1	1	3
hsa-miR-1185-2-3p	MIMAT0022713	AFTPH	54812	NM_017657	1	1	1	3
hsa-miR-1185-2-3p	MIMAT0022713	AGGF1	55109	NM_018046	1	1	1	3
hsa-miR-1185-2-3p	MIMAT0022713	AKAP9	10142	NM_005751	1	1	1	3
hsa-miR-1185-2-3p	MIMAT0022713	ALDH1L2	160428	NM_001034173	1	1	1	3
hsa-miR-1185-2-3p	MIMAT0022713	ALG9	79796	NM_001077692	1	1	1	3
hsa-miR-1185-2-3p	MIMAT0022713	ANK3	288	NM_020987	1	1	1	3
hsa-miR-1185-2-3p	MIMAT0022713	ANKIB1	54467	NM_019004	1	1	1	3
hsa-miR-1185-2-3p	MIMAT0022713	ANKRA2	57763	NM_023039	1	1	1	3
hsa-miR-1185-2-3p	MIMAT0022713	ANKS1A	23294	NM_015245	1	1	1	3
hsa-miR-1185-2-3p	MIMAT0022713	ANP32A	8125	NM_006305	1	1	1	3
hsa-miR-1185-2-3p	MIMAT0022713	ARAP1	116985	NM_001040118	1	1	1	3
hsa-miR-1185-2-3p	MIMAT0022713	AREG	374	NM_001657	1	1	1	3
hsa-miR-1185-2-3p	MIMAT0022713	AREGB	727738	XM_001125684	1	1	1	3
hsa-miR-1185-2-3p	MIMAT0022713	ARF3	377	NM_001659	1	1	1	3
hsa-miR-1185-2-3p	MIMAT0022713	ARFGEF2	10564	NM_006420	1	1	1	3
hsa-miR-1185-2-3p	MIMAT0022713	ARID4A	5926	NM_002892	1	1	1	3
hsa-miR-1185-2-3p	MIMAT0022713	ARID4B	51742	NM_016374	1	1	1	3
hsa-miR-1185-2-3p	MIMAT0022713	ARID5B	84159	NM_001244638	1	1	1	3
hsa-miR-1185-2-3p	MIMAT0022713	ARPC5	10092	NM_005717	1	1	1	3
hsa-miR-1185-2-3p	MIMAT0022713	ART3	419	NM_001130016	1	1	1	3
hsa-miR-1185-2-3p	MIMAT0022713	ASAH1	427	NM_001127505	1	1	1	3
hsa-miR-1185-2-3p	MIMAT0022713	ASAP2	8853	NM_001135191	1	1	1	3
hsa-miR-1185-2-3p	MIMAT0022713	ASPH	444	NM_004318	1	1	1	3
hsa-miR-1185-2-3p	MIMAT0022713	ASXL1	171023	NM_015338	1	1	1	3
hsa-miR-1185-2-3p	MIMAT0022713	ATG12	9140	NM_004707	1	1	1	3
hsa-miR-1185-2-3p	MIMAT0022713	ATL2	64225	NM_022374	1	1	1	3
hsa-miR-1185-2-3p	MIMAT0022713	ATP13A3	79572	NM_024524	1	1	1	3
hsa-miR-1185-2-3p	MIMAT0022713	ATP2B2	491	NM_001001331	1	1	1	3
hsa-miR-1185-2-3p	MIMAT0022713	ATRX	546	NM_000489	1	1	1	3
hsa-miR-1185-2-3p	MIMAT0022713	ATXN3	4287	NM_001127697	1	1	1	3
hsa-miR-1185-2-3p	MIMAT0022713	AZIN1	51582	NM_015878	1	1	1	3
hsa-miR-1185-2-3p	MIMAT0022713	B3GALNT1	8706	NM_033167	1	1	1	3
hsa-miR-1185-2-3p	MIMAT0022713	B3GALT2	8707	NM_003783	1	1	1	3
hsa-miR-1185-2-3p	MIMAT0022713	BACE1	23621	NM_138971	1	1	1	3
hsa-miR-1185-2-3p	MIMAT0022713	BCKDHB	594	NM_183050	1	1	1	3
hsa-miR-1185-2-3p	MIMAT0022713	BCL6	604	NM_001130845	1	1	1	3
hsa-miR-1185-2-3p	MIMAT0022713	BCLAF1	9774	NM_014739	1	1	1	3
hsa-miR-1185-2-3p	MIMAT0022713	BEND7	222389	NM_001100912	1	1	1	3
hsa-miR-1185-2-3p	MIMAT0022713	BEX4	56271	NM_001127688	1	1	1	3
hsa-miR-1185-2-3p	MIMAT0022713	BMP3	651	NM_001201	1	1	1	3
hsa-miR-1185-2-3p	MIMAT0022713	BMP7	655	NM_001719	1	1	1	3
hsa-miR-1185-2-3p	MIMAT0022713	BMPR2	659	NM_001204	1	1	1	3
hsa-miR-1185-2-3p	MIMAT0022713	C16orf52	730094	NM_001164579	1	1	1	3
hsa-miR-1185-2-3p	MIMAT0022713	C20orf112	140688	NM_080616	1	1	1	3
hsa-miR-1185-2-3p	MIMAT0022713	C21orf91	54149	NM_017447	1	1	1	3
hsa-miR-1185-2-3p	MIMAT0022713	C2orf54	79919	NM_024861	1	1	1	3
hsa-miR-1185-2-3p	MIMAT0022713	C4orf40	401137	NM_214711	1	1	1	3
hsa-miR-1185-2-3p	MIMAT0022713	CADM2	253559	NM_001167674	1	1	1	3
hsa-miR-1185-2-3p	MIMAT0022713	CALCRL	10203	NM_005795	1	1	1	3
hsa-miR-1185-2-3p	MIMAT0022713	CALN1	83698	NM_001017440	1	1	1	3
hsa-miR-1185-2-3p	MIMAT0022713	CAPRIN1	4076	NM_005898	1	1	1	3
hsa-miR-1185-2-3p	MIMAT0022713	CASP8AP2	9994	NM_001137667	1	1	1	3
hsa-miR-1185-2-3p	MIMAT0022713	CAV2	858	NM_198212	1	1	1	3
hsa-miR-1185-2-3p	MIMAT0022713	CBLN4	140689	NM_080617	1	1	1	3
hsa-miR-1185-2-3p	MIMAT0022713	CBX3	11335	NM_007276	1	1	1	3
hsa-miR-1185-2-3p	MIMAT0022713	CCDC126	90693	NM_138771	1	1	1	3
hsa-miR-1185-2-3p	MIMAT0022713	CCDC39	339829	NM_181426	1	1	1	3
hsa-miR-1185-2-3p	MIMAT0022713	CCDC85A	114800	NM_001080433	1	1	1	3
hsa-miR-1185-2-3p	MIMAT0022713	CCL8	6355	NM_005623	1	1	1	3
hsa-miR-1185-2-3p	MIMAT0022713	CCNE2	9134	NM_057749	1	1	1	3
hsa-miR-1185-2-3p	MIMAT0022713	CD163	9332	NM_004244	1	1	1	3
hsa-miR-1185-2-3p	MIMAT0022713	CD24	100133941	NM_013230	1	1	1	3
hsa-miR-1185-2-3p	MIMAT0022713	CDC27	996	NM_001114091	1	1	1	3
hsa-miR-1185-2-3p	MIMAT0022713	CDK14	5218	NM_012395	1	1	1	3
hsa-miR-1185-2-3p	MIMAT0022713	CDK6	1021	NM_001259	1	1	1	3
hsa-miR-1185-2-3p	MIMAT0022713	CDKL2	8999	NM_003948	1	1	1	3
hsa-miR-1185-2-3p	MIMAT0022713	CDKN1B	1027	NM_004064	1	1	1	3
hsa-miR-1185-2-3p	MIMAT0022713	CDS2	8760	NM_003818	1	1	1	3
hsa-miR-1185-2-3p	MIMAT0022713	CEP41	95681	NM_018718	1	1	1	3
hsa-miR-1185-2-3p	MIMAT0022713	CH25H	9023	NM_003956	1	1	1	3
hsa-miR-1185-2-3p	MIMAT0022713	CHAMP1	283489	NM_032436	1	1	1	3
hsa-miR-1185-2-3p	MIMAT0022713	CHMP1B	57132	NM_020412	1	1	1	3
hsa-miR-1185-2-3p	MIMAT0022713	CHMP2B	25978	NM_014043	1	1	1	3
hsa-miR-1185-2-3p	MIMAT0022713	CHODL	140578	NM_001204176	1	1	1	3
hsa-miR-1185-2-3p	MIMAT0022713	CLDN23	137075	NM_194284	1	1	1	3
hsa-miR-1185-2-3p	MIMAT0022713	CLEC2D	29121	NM_013269	1	1	1	3
hsa-miR-1185-2-3p	MIMAT0022713	CNOT6	57472	NM_015455	1	1	1	3
hsa-miR-1185-2-3p	MIMAT0022713	CNR1	1268	NM_001160226	1	1	1	3
hsa-miR-1185-2-3p	MIMAT0022713	CNTN3	5067	NM_020872	1	1	1	3
hsa-miR-1185-2-3p	MIMAT0022713	COBLL1	22837	NM_014900	1	1	1	3
hsa-miR-1185-2-3p	MIMAT0022713	COL19A1	1310	NM_001858	1	1	1	3
hsa-miR-1185-2-3p	MIMAT0022713	CPD	1362	NM_001304	1	1	1	3
hsa-miR-1185-2-3p	MIMAT0022713	CR2	1380	NM_001877	1	1	1	3
hsa-miR-1185-2-3p	MIMAT0022713	CREBBP	1387	NM_004380	1	1	1	3
hsa-miR-1185-2-3p	MIMAT0022713	CSNK1G3	1456	NM_001031812	1	1	1	3
hsa-miR-1185-2-3p	MIMAT0022713	CSPP1	79848	NM_024790	1	1	1	3
hsa-miR-1185-2-3p	MIMAT0022713	CTDSPL2	51496	NM_016396	1	1	1	3
hsa-miR-1185-2-3p	MIMAT0022713	CTPS2	56474	NM_175859	1	1	1	3
hsa-miR-1185-2-3p	MIMAT0022713	CTR9	9646	NM_014633	1	1	1	3
hsa-miR-1185-2-3p	MIMAT0022713	CTTNBP2	83992	NM_033427	1	1	1	3
hsa-miR-1185-2-3p	MIMAT0022713	CYP19A1	1588	NM_031226	1	1	1	3
hsa-miR-1185-2-3p	MIMAT0022713	CYP24A1	1591	NM_000782	1	1	1	3
hsa-miR-1185-2-3p	MIMAT0022713	CYP26B1	56603	NM_019885	1	1	1	3
hsa-miR-1185-2-3p	MIMAT0022713	DAGLA	747	NM_006133	1	1	1	3
hsa-miR-1185-2-3p	MIMAT0022713	DBT	1629	NM_001918	1	1	1	3
hsa-miR-1185-2-3p	MIMAT0022713	DBX2	440097	NM_001004329	1	1	1	3
hsa-miR-1185-2-3p	MIMAT0022713	DCAF7	10238	NM_005828	1	1	1	3
hsa-miR-1185-2-3p	MIMAT0022713	DCLRE1B	64858	NM_022836	1	1	1	3
hsa-miR-1185-2-3p	MIMAT0022713	DDHD2	23259	NM_015214	1	1	1	3
hsa-miR-1185-2-3p	MIMAT0022713	DDX46	9879	NM_014829	1	1	1	3
hsa-miR-1185-2-3p	MIMAT0022713	DEPDC5	9681	NM_014662	1	1	1	3
hsa-miR-1185-2-3p	MIMAT0022713	DGKI	9162	NM_004717	1	1	1	3
hsa-miR-1185-2-3p	MIMAT0022713	DLX5	1749	NM_005221	1	1	1	3
hsa-miR-1185-2-3p	MIMAT0022713	DLX6	1750	NM_005222	1	1	1	3
hsa-miR-1185-2-3p	MIMAT0022713	DNAJB12	54788	NM_017626	1	1	1	3
hsa-miR-1185-2-3p	MIMAT0022713	DNAJB9	4189	NM_012328	1	1	1	3
hsa-miR-1185-2-3p	MIMAT0022713	DNAJC15	29103	NM_013238	1	1	1	3
hsa-miR-1185-2-3p	MIMAT0022713	DOCK3	1795	NM_004947	1	1	1	3
hsa-miR-1185-2-3p	MIMAT0022713	DOCK8	81704	NM_001193536	1	1	1	3
hsa-miR-1185-2-3p	MIMAT0022713	DPY19L1	23333	NM_015283	1	1	1	3
hsa-miR-1185-2-3p	MIMAT0022713	DST	667	NM_015548	1	1	1	3
hsa-miR-1185-2-3p	MIMAT0022713	DSTYK	25778	NM_199462	1	1	1	3
hsa-miR-1185-2-3p	MIMAT0022713	DUSP19	142679	NM_001142314	1	1	1	3
hsa-miR-1185-2-3p	MIMAT0022713	DYNC2LI1	51626	NM_016008	1	1	1	3
hsa-miR-1185-2-3p	MIMAT0022713	DYNLL2	140735	NM_080677	1	1	1	3
hsa-miR-1185-2-3p	MIMAT0022713	E2F6	1876	NM_198256	1	1	1	3
hsa-miR-1185-2-3p	MIMAT0022713	EAPP	55837	NM_018453	1	1	1	3
hsa-miR-1185-2-3p	MIMAT0022713	EDAR	10913	NM_022336	1	1	1	3
hsa-miR-1185-2-3p	MIMAT0022713	EDN2	1907	NM_001956	1	1	1	3
hsa-miR-1185-2-3p	MIMAT0022713	EFR3A	23167	NM_015137	1	1	1	3
hsa-miR-1185-2-3p	MIMAT0022713	EGLN1	54583	NM_022051	1	1	1	3
hsa-miR-1185-2-3p	MIMAT0022713	EGR2	1959	NM_001136179	1	1	1	3
hsa-miR-1185-2-3p	MIMAT0022713	EIF4A2	1974	NM_001967	1	1	1	3
hsa-miR-1185-2-3p	MIMAT0022713	EIF5A2	56648	NM_020390	1	1	1	3
hsa-miR-1185-2-3p	MIMAT0022713	ELK4	2005	NM_001973	1	1	1	3
hsa-miR-1185-2-3p	MIMAT0022713	ENAM	10117	NM_031889	1	1	1	3
hsa-miR-1185-2-3p	MIMAT0022713	ENC1	8507	NM_003633	1	1	1	3
hsa-miR-1185-2-3p	MIMAT0022713	ENKUR	219670	NM_145010	1	1	1	3
hsa-miR-1185-2-3p	MIMAT0022713	ENPP3	5169	NM_005021	1	1	1	3
hsa-miR-1185-2-3p	MIMAT0022713	EPHA5	2044	NM_182472	1	1	1	3
hsa-miR-1185-2-3p	MIMAT0022713	ERAP1	51752	NM_016442	1	1	1	3
hsa-miR-1185-2-3p	MIMAT0022713	ERBB4	2066	NM_005235	1	1	1	3
hsa-miR-1185-2-3p	MIMAT0022713	ERCC3	2071	NM_000122	1	1	1	3
hsa-miR-1185-2-3p	MIMAT0022713	ERO1LB	56605	NM_019891	1	1	1	3
hsa-miR-1185-2-3p	MIMAT0022713	ESCO1	114799	NM_052911	1	1	1	3
hsa-miR-1185-2-3p	MIMAT0022713	ESRP1	54845	NM_001034915	1	1	1	3
hsa-miR-1185-2-3p	MIMAT0022713	ETV5	2119	NM_004454	1	1	1	3
hsa-miR-1185-2-3p	MIMAT0022713	EYA4	2070	NM_172105	1	1	1	3
hsa-miR-1185-2-3p	MIMAT0022713	EYS	346007	NM_001142800	1	1	1	3
hsa-miR-1185-2-3p	MIMAT0022713	EZR	7430	NM_003379	1	1	1	3
hsa-miR-1185-2-3p	MIMAT0022713	F2R	2149	NM_001992	1	1	1	3
hsa-miR-1185-2-3p	MIMAT0022713	F2RL2	2151	NM_004101	1	1	1	3
hsa-miR-1185-2-3p	MIMAT0022713	FAM102B	284611	NM_001010883	1	1	1	3
hsa-miR-1185-2-3p	MIMAT0022713	FAM105A	54491	NM_019018	1	1	1	3
hsa-miR-1185-2-3p	MIMAT0022713	FAM126A	84668	NM_032581	1	1	1	3
hsa-miR-1185-2-3p	MIMAT0022713	FAM126B	285172	NM_173822	1	1	1	3
hsa-miR-1185-2-3p	MIMAT0022713	FAM13B	51306	NM_016603	1	1	1	3
hsa-miR-1185-2-3p	MIMAT0022713	FAM172A	83989	NM_032042	1	1	1	3
hsa-miR-1185-2-3p	MIMAT0022713	FAM65B	9750	NM_014722	1	1	1	3
hsa-miR-1185-2-3p	MIMAT0022713	FAT1	2195	NM_005245	1	1	1	3
hsa-miR-1185-2-3p	MIMAT0022713	FAXC	84553	NM_032511	1	1	1	3
hsa-miR-1185-2-3p	MIMAT0022713	FBXO32	114907	NM_001242463	1	1	1	3
hsa-miR-1185-2-3p	MIMAT0022713	FBXO34	55030	NM_017943	1	1	1	3
hsa-miR-1185-2-3p	MIMAT0022713	FBXO9	26268	NM_033481	1	1	1	3
hsa-miR-1185-2-3p	MIMAT0022713	FERMT2	10979	NM_006832	1	1	1	3
hsa-miR-1185-2-3p	MIMAT0022713	FGD4	121512	NM_139241	1	1	1	3
hsa-miR-1185-2-3p	MIMAT0022713	FGF13	2258	NM_033642	1	1	1	3
hsa-miR-1185-2-3p	MIMAT0022713	FILIP1L	11259	NM_001042459	1	1	1	3
hsa-miR-1185-2-3p	MIMAT0022713	FJX1	24147	NM_014344	1	1	1	3
hsa-miR-1185-2-3p	MIMAT0022713	FLT1	2321	NM_001159920	1	1	1	3
hsa-miR-1185-2-3p	MIMAT0022713	FMN2	56776	NM_020066	1	1	1	3
hsa-miR-1185-2-3p	MIMAT0022713	FNIP1	96459	NM_001008738	1	1	1	3
hsa-miR-1185-2-3p	MIMAT0022713	FOXJ2	55810	NM_018416	1	1	1	3
hsa-miR-1185-2-3p	MIMAT0022713	FRMD3	257019	NM_174938	1	1	1	3
hsa-miR-1185-2-3p	MIMAT0022713	FRMPD3	84443	XM_042978	1	1	1	3
hsa-miR-1185-2-3p	MIMAT0022713	FRMPD4	9758	NM_014728	1	1	1	3
hsa-miR-1185-2-3p	MIMAT0022713	FSTL5	56884	NM_020116	1	1	1	3
hsa-miR-1185-2-3p	MIMAT0022713	FUT8	2530	NM_178155	1	1	1	3
hsa-miR-1185-2-3p	MIMAT0022713	FUT9	10690	NM_006581	1	1	1	3
hsa-miR-1185-2-3p	MIMAT0022713	FXR1	8087	NM_001013439	1	1	1	3
hsa-miR-1185-2-3p	MIMAT0022713	FZD3	7976	NM_017412	1	1	1	3
hsa-miR-1185-2-3p	MIMAT0022713	GABPA	2551	NM_002040	1	1	1	3
hsa-miR-1185-2-3p	MIMAT0022713	GABPB1	2553	NM_016654	1	1	1	3
hsa-miR-1185-2-3p	MIMAT0022713	GABRA1	2554	NM_001127644	1	1	1	3
hsa-miR-1185-2-3p	MIMAT0022713	GABRA4	2557	NM_001204266	1	1	1	3
hsa-miR-1185-2-3p	MIMAT0022713	GABRB2	2561	NM_000813	1	1	1	3
hsa-miR-1185-2-3p	MIMAT0022713	GADL1	339896	NM_207359	1	1	1	3
hsa-miR-1185-2-3p	MIMAT0022713	GCC2	9648	NM_181453	1	1	1	3
hsa-miR-1185-2-3p	MIMAT0022713	GCFC2	6936	NM_001201335	1	1	1	3
hsa-miR-1185-2-3p	MIMAT0022713	GDAP2	54834	NM_017686	1	1	1	3
hsa-miR-1185-2-3p	MIMAT0022713	GK5	256356	NM_001039547	1	1	1	3
hsa-miR-1185-2-3p	MIMAT0022713	GLI2	2736	NM_005270	1	1	1	3
hsa-miR-1185-2-3p	MIMAT0022713	GLOD4	51031	NM_016080	1	1	1	3
hsa-miR-1185-2-3p	MIMAT0022713	GNG12	55970	NM_018841	1	1	1	3
hsa-miR-1185-2-3p	MIMAT0022713	GOLGA7	51125	NM_016099	1	1	1	3
hsa-miR-1185-2-3p	MIMAT0022713	GP1BA	2811	NM_000173	1	1	1	3
hsa-miR-1185-2-3p	MIMAT0022713	GPR126	57211	NM_198569	1	1	1	3
hsa-miR-1185-2-3p	MIMAT0022713	GPRASP1	9737	NM_001099411	1	1	1	3
hsa-miR-1185-2-3p	MIMAT0022713	GRHL3	57822	NM_001195010	1	1	1	3
hsa-miR-1185-2-3p	MIMAT0022713	GRIA3	2892	NM_007325	1	1	1	3
hsa-miR-1185-2-3p	MIMAT0022713	GRIK3	2899	NM_000831	1	1	1	3
hsa-miR-1185-2-3p	MIMAT0022713	GSK3B	2932	NM_002093	1	1	1	3
hsa-miR-1185-2-3p	MIMAT0022713	GSTCD	79807	NM_024751	1	1	1	3
hsa-miR-1185-2-3p	MIMAT0022713	GUCY1A3	2982	NM_001130683	1	1	1	3
hsa-miR-1185-2-3p	MIMAT0022713	HCN4	10021	NM_005477	1	1	1	3
hsa-miR-1185-2-3p	MIMAT0022713	HIAT1	64645	NM_033055	1	1	1	3
hsa-miR-1185-2-3p	MIMAT0022713	HMGB1	3146	NM_002128	1	1	1	3
hsa-miR-1185-2-3p	MIMAT0022713	HMGB3	3149	NM_005342	1	1	1	3
hsa-miR-1185-2-3p	MIMAT0022713	HMGXB4	10042	NM_001003681	1	1	1	3
hsa-miR-1185-2-3p	MIMAT0022713	HNRNPU	3192	NM_031844	1	1	1	3
hsa-miR-1185-2-3p	MIMAT0022713	HOXA9	3205	NM_152739	1	1	1	3
hsa-miR-1185-2-3p	MIMAT0022713	HSPE1-MOB4	100529241	NM_001202485	1	1	1	3
hsa-miR-1185-2-3p	MIMAT0022713	HVCN1	84329	NM_001040107	1	1	1	3
hsa-miR-1185-2-3p	MIMAT0022713	IAPP	3375	NM_000415	1	1	1	3
hsa-miR-1185-2-3p	MIMAT0022713	IBSP	3381	NM_004967	1	1	1	3
hsa-miR-1185-2-3p	MIMAT0022713	ICA1L	130026	NM_138468	1	1	1	3
hsa-miR-1185-2-3p	MIMAT0022713	ID2	3398	NM_002166	1	1	1	3
hsa-miR-1185-2-3p	MIMAT0022713	IKZF2	22807	NM_001079526	1	1	1	3
hsa-miR-1185-2-3p	MIMAT0022713	IL7	3574	NM_001199887	1	1	1	3
hsa-miR-1185-2-3p	MIMAT0022713	ILDR1	286676	NM_175924	1	1	1	3
hsa-miR-1185-2-3p	MIMAT0022713	ING3	54556	NM_019071	1	1	1	3
hsa-miR-1185-2-3p	MIMAT0022713	INO80D	54891	NM_017759	1	1	1	3
hsa-miR-1185-2-3p	MIMAT0022713	INSM1	3642	NM_002196	1	1	1	3
hsa-miR-1185-2-3p	MIMAT0022713	IPMK	253430	NM_152230	1	1	1	3
hsa-miR-1185-2-3p	MIMAT0022713	IQGAP1	8826	NM_003870	1	1	1	3
hsa-miR-1185-2-3p	MIMAT0022713	IRF2BP2	359948	NM_182972	1	1	1	3
hsa-miR-1185-2-3p	MIMAT0022713	IRF5	3663	NM_001242452	1	1	1	3
hsa-miR-1185-2-3p	MIMAT0022713	IRS1	3667	NM_005544	1	1	1	3
hsa-miR-1185-2-3p	MIMAT0022713	IRX1	79192	NM_024337	1	1	1	3
hsa-miR-1185-2-3p	MIMAT0022713	IRX3	79191	NM_024336	1	1	1	3
hsa-miR-1185-2-3p	MIMAT0022713	IRX5	10265	NM_005853	1	1	1	3
hsa-miR-1185-2-3p	MIMAT0022713	ITGA2	3673	NM_002203	1	1	1	3
hsa-miR-1185-2-3p	MIMAT0022713	ITGA6	3655	NM_001079818	1	1	1	3
hsa-miR-1185-2-3p	MIMAT0022713	JAK2	3717	NM_004972	1	1	1	3
hsa-miR-1185-2-3p	MIMAT0022713	JAKMIP3	282973	NM_001105521	1	1	1	3
hsa-miR-1185-2-3p	MIMAT0022713	KATNAL1	84056	NM_032116	1	1	1	3
hsa-miR-1185-2-3p	MIMAT0022713	KBTBD11	9920	NM_014867	1	1	1	3
hsa-miR-1185-2-3p	MIMAT0022713	KCMF1	56888	NM_020122	1	1	1	3
hsa-miR-1185-2-3p	MIMAT0022713	KCNC2	3747	NM_139136	1	1	1	3
hsa-miR-1185-2-3p	MIMAT0022713	KCNG3	170850	NM_172344	1	1	1	3
hsa-miR-1185-2-3p	MIMAT0022713	KHDRBS3	10656	NM_006558	1	1	1	3
hsa-miR-1185-2-3p	MIMAT0022713	KIAA1147	57189	NM_001080392	1	1	1	3
hsa-miR-1185-2-3p	MIMAT0022713	KIAA1324L	222223	NM_152748	1	1	1	3
hsa-miR-1185-2-3p	MIMAT0022713	KIAA1467	57613	NM_020853	1	1	1	3
hsa-miR-1185-2-3p	MIMAT0022713	KIAA1715	80856	NM_030650	1	1	1	3
hsa-miR-1185-2-3p	MIMAT0022713	KIAA2018	205717	NM_001009899	1	1	1	3
hsa-miR-1185-2-3p	MIMAT0022713	KIAA2022	340533	NM_001008537	1	1	1	3
hsa-miR-1185-2-3p	MIMAT0022713	KIF13A	63971	NM_001105568	1	1	1	3
hsa-miR-1185-2-3p	MIMAT0022713	KIF14	9928	NM_014875	1	1	1	3
hsa-miR-1185-2-3p	MIMAT0022713	KIF3A	11127	NM_007054	1	1	1	3
hsa-miR-1185-2-3p	MIMAT0022713	KIN	22944	NM_012311	1	1	1	3
hsa-miR-1185-2-3p	MIMAT0022713	KIT	3815	NM_001093772	1	1	1	3
hsa-miR-1185-2-3p	MIMAT0022713	KLF10	7071	NM_001032282	1	1	1	3
hsa-miR-1185-2-3p	MIMAT0022713	KLF12	11278	NM_007249	1	1	1	3
hsa-miR-1185-2-3p	MIMAT0022713	KLF5	688	NM_001730	1	1	1	3
hsa-miR-1185-2-3p	MIMAT0022713	KLHL3	26249	NM_017415	1	1	1	3
hsa-miR-1185-2-3p	MIMAT0022713	KMT2C	58508	NM_170606	1	1	1	3
hsa-miR-1185-2-3p	MIMAT0022713	KMT2E	55904	NM_018682	1	1	1	3
hsa-miR-1185-2-3p	MIMAT0022713	KRIT1	889	NM_194455	1	1	1	3
hsa-miR-1185-2-3p	MIMAT0022713	LANCL2	55915	NM_018697	1	1	1	3
hsa-miR-1185-2-3p	MIMAT0022713	LATS1	9113	NM_004690	1	1	1	3
hsa-miR-1185-2-3p	MIMAT0022713	LCTL	197021	NM_207338	1	1	1	3
hsa-miR-1185-2-3p	MIMAT0022713	LDLR	3949	NM_000527	1	1	1	3
hsa-miR-1185-2-3p	MIMAT0022713	LEPROT	54741	NM_017526	1	1	1	3
hsa-miR-1185-2-3p	MIMAT0022713	LGSN	51557	NM_001143940	1	1	1	3
hsa-miR-1185-2-3p	MIMAT0022713	LHFPL3	375612	NM_199000	1	1	1	3
hsa-miR-1185-2-3p	MIMAT0022713	LHX2	9355	NM_004789	1	1	1	3
hsa-miR-1185-2-3p	MIMAT0022713	LIFR	3977	NM_002310	1	1	1	3
hsa-miR-1185-2-3p	MIMAT0022713	LITAF	9516	NM_001136473	1	1	1	3
hsa-miR-1185-2-3p	MIMAT0022713	LMO3	55885	NM_018640	1	1	1	3
hsa-miR-1185-2-3p	MIMAT0022713	LMTK2	22853	NM_014916	1	1	1	3
hsa-miR-1185-2-3p	MIMAT0022713	LOC100127983	100127983	NM_001190972	1	1	1	3
hsa-miR-1185-2-3p	MIMAT0022713	LOX	4015	NM_001178102	1	1	1	3
hsa-miR-1185-2-3p	MIMAT0022713	LRP6	4040	NM_002336	1	1	1	3
hsa-miR-1185-2-3p	MIMAT0022713	LSM14A	26065	NM_001114093	1	1	1	3
hsa-miR-1185-2-3p	MIMAT0022713	LSM5	23658	NM_012322	1	1	1	3
hsa-miR-1185-2-3p	MIMAT0022713	MAB21L1	4081	NM_005584	1	1	1	3
hsa-miR-1185-2-3p	MIMAT0022713	MAGI3	260425	NM_152900	1	1	1	3
hsa-miR-1185-2-3p	MIMAT0022713	MAGT1	84061	NM_032121	1	1	1	3
hsa-miR-1185-2-3p	MIMAT0022713	MAML1	9794	NM_014757	1	1	1	3
hsa-miR-1185-2-3p	MIMAT0022713	MAP1LC3B	81631	NM_022818	1	1	1	3
hsa-miR-1185-2-3p	MIMAT0022713	MAP2	4133	NM_001039538	1	1	1	3
hsa-miR-1185-2-3p	MIMAT0022713	MAP3K5	4217	NM_005923	1	1	1	3
hsa-miR-1185-2-3p	MIMAT0022713	MAPK1	5594	NM_002745	1	1	1	3
hsa-miR-1185-2-3p	MIMAT0022713	MAPKAPK5	8550	NM_139078	1	1	1	3
hsa-miR-1185-2-3p	MIMAT0022713	MARCHF1	55016	NM_001166373	1	1	1	3
hsa-miR-1185-2-3p	MIMAT0022713	MASP1	5648	NM_139125	1	1	1	3
hsa-miR-1185-2-3p	MIMAT0022713	MASTL	84930	NM_032844	1	1	1	3
hsa-miR-1185-2-3p	MIMAT0022713	MBD2	8932	NM_003927	1	1	1	3
hsa-miR-1185-2-3p	MIMAT0022713	MBNL1	4154	NM_207292	1	1	1	3
hsa-miR-1185-2-3p	MIMAT0022713	MBNL3	55796	NM_001170704	1	1	1	3
hsa-miR-1185-2-3p	MIMAT0022713	MCF2	4168	NM_005369	1	1	1	3
hsa-miR-1185-2-3p	MIMAT0022713	MCTP2	55784	NM_018349	1	1	1	3
hsa-miR-1185-2-3p	MIMAT0022713	MDM1	56890	NM_017440	1	1	1	3
hsa-miR-1185-2-3p	MIMAT0022713	MECP2	4204	NM_004992	1	1	1	3
hsa-miR-1185-2-3p	MIMAT0022713	MED13L	23389	NM_015335	1	1	1	3
hsa-miR-1185-2-3p	MIMAT0022713	MEOX2	4223	NM_005924	1	1	1	3
hsa-miR-1185-2-3p	MIMAT0022713	METTL21A	151194	NM_145280	1	1	1	3
hsa-miR-1185-2-3p	MIMAT0022713	MFAP3	4238	NM_001242336	1	1	1	3
hsa-miR-1185-2-3p	MIMAT0022713	MFSD4	148808	NM_181644	1	1	1	3
hsa-miR-1185-2-3p	MIMAT0022713	MGRN1	23295	NM_001142290	1	1	1	3
hsa-miR-1185-2-3p	MIMAT0022713	MIB1	57534	NM_020774	1	1	1	3
hsa-miR-1185-2-3p	MIMAT0022713	MIER3	166968	NM_152622	1	1	1	3
hsa-miR-1185-2-3p	MIMAT0022713	MITF	4286	NM_006722	1	1	1	3
hsa-miR-1185-2-3p	MIMAT0022713	MMS22L	253714	NM_198468	1	1	1	3
hsa-miR-1185-2-3p	MIMAT0022713	MOB4	25843	NM_015387	1	1	1	3
hsa-miR-1185-2-3p	MIMAT0022713	MORC3	23515	NM_015358	1	1	1	3
hsa-miR-1185-2-3p	MIMAT0022713	MPZ	4359	NM_000530	1	1	1	3
hsa-miR-1185-2-3p	MIMAT0022713	MRPS36	92259	NM_033281	1	1	1	3
hsa-miR-1185-2-3p	MIMAT0022713	MSX1	4487	NM_002448	1	1	1	3
hsa-miR-1185-2-3p	MIMAT0022713	MTM1	4534	NM_000252	1	1	1	3
hsa-miR-1185-2-3p	MIMAT0022713	MTOR	2475	NM_004958	1	1	1	3
hsa-miR-1185-2-3p	MIMAT0022713	MYCBP	26292	NM_012333	1	1	1	3
hsa-miR-1185-2-3p	MIMAT0022713	MYCN	4613	NM_005378	1	1	1	3
hsa-miR-1185-2-3p	MIMAT0022713	MYO1E	4643	NM_004998	1	1	1	3
hsa-miR-1185-2-3p	MIMAT0022713	N4BP2	55728	NM_018177	1	1	1	3
hsa-miR-1185-2-3p	MIMAT0022713	NAA15	80155	NM_057175	1	1	1	3
hsa-miR-1185-2-3p	MIMAT0022713	NADK2	133686	NM_001085411	1	1	1	3
hsa-miR-1185-2-3p	MIMAT0022713	NASP	4678	NM_001195193	1	1	1	3
hsa-miR-1185-2-3p	MIMAT0022713	NAV3	89795	NM_014903	1	1	1	3
hsa-miR-1185-2-3p	MIMAT0022713	NDFIP1	80762	NM_030571	1	1	1	3
hsa-miR-1185-2-3p	MIMAT0022713	NECAB1	64168	NM_022351	1	1	1	3
hsa-miR-1185-2-3p	MIMAT0022713	NEMF	9147	NM_004713	1	1	1	3
hsa-miR-1185-2-3p	MIMAT0022713	NEUROD1	4760	NM_002500	1	1	1	3
hsa-miR-1185-2-3p	MIMAT0022713	NFKBIZ	64332	NM_001005474	1	1	1	3
hsa-miR-1185-2-3p	MIMAT0022713	NFX1	4799	NM_002504	1	1	1	3
hsa-miR-1185-2-3p	MIMAT0022713	NKTR	4820	NM_005385	1	1	1	3
hsa-miR-1185-2-3p	MIMAT0022713	NOS1	4842	NM_000620	1	1	1	3
hsa-miR-1185-2-3p	MIMAT0022713	NOVA2	4858	NM_002516	1	1	1	3
hsa-miR-1185-2-3p	MIMAT0022713	NPAT	4863	NM_002519	1	1	1	3
hsa-miR-1185-2-3p	MIMAT0022713	NPTX1	4884	NM_002522	1	1	1	3
hsa-miR-1185-2-3p	MIMAT0022713	NR3C1	2908	NM_001204264	1	1	1	3
hsa-miR-1185-2-3p	MIMAT0022713	NRIP1	8204	NM_003489	1	1	1	3
hsa-miR-1185-2-3p	MIMAT0022713	NSL1	25936	NM_015471	1	1	1	3
hsa-miR-1185-2-3p	MIMAT0022713	NUDCD1	84955	NM_001128211	1	1	1	3
hsa-miR-1185-2-3p	MIMAT0022713	NUP160	23279	NM_015231	1	1	1	3
hsa-miR-1185-2-3p	MIMAT0022713	NXT2	55916	NM_001242617	1	1	1	3
hsa-miR-1185-2-3p	MIMAT0022713	ONECUT2	9480	NM_004852	1	1	1	3
hsa-miR-1185-2-3p	MIMAT0022713	OR2C3	81472	NM_198074	1	1	1	3
hsa-miR-1185-2-3p	MIMAT0022713	OTUD1	220213	NM_001145373	1	1	1	3
hsa-miR-1185-2-3p	MIMAT0022713	PAFAH1B2	5049	NM_001184748	1	1	1	3
hsa-miR-1185-2-3p	MIMAT0022713	PAG1	55824	NM_018440	1	1	1	3
hsa-miR-1185-2-3p	MIMAT0022713	PAH	5053	NM_000277	1	1	1	3
hsa-miR-1185-2-3p	MIMAT0022713	PAN3	255967	NM_175854	1	1	1	3
hsa-miR-1185-2-3p	MIMAT0022713	PANK1	53354	NM_148978	1	1	1	3
hsa-miR-1185-2-3p	MIMAT0022713	PBRM1	55193	NM_018313	1	1	1	3
hsa-miR-1185-2-3p	MIMAT0022713	PBX3	5090	NM_006195	1	1	1	3
hsa-miR-1185-2-3p	MIMAT0022713	PCDH15	65217	NM_001142772	1	1	1	3
hsa-miR-1185-2-3p	MIMAT0022713	PCDHA9	9752	NM_014005	1	1	1	3
hsa-miR-1185-2-3p	MIMAT0022713	PCLO	27445	NM_033026	1	1	1	3
hsa-miR-1185-2-3p	MIMAT0022713	PCM1	5108	NM_006197	1	1	1	3
hsa-miR-1185-2-3p	MIMAT0022713	PCSK2	5126	NM_001201528	1	1	1	3
hsa-miR-1185-2-3p	MIMAT0022713	PDCD10	11235	NM_145859	1	1	1	3
hsa-miR-1185-2-3p	MIMAT0022713	PDCD6IP	10015	NM_001162429	1	1	1	3
hsa-miR-1185-2-3p	MIMAT0022713	PDE11A	50940	NM_001077197	1	1	1	3
hsa-miR-1185-2-3p	MIMAT0022713	PDE5A	8654	NM_001083	1	1	1	3
hsa-miR-1185-2-3p	MIMAT0022713	PDE7A	5150	NM_002603	1	1	1	3
hsa-miR-1185-2-3p	MIMAT0022713	PDS5B	23047	NM_015032	1	1	1	3
hsa-miR-1185-2-3p	MIMAT0022713	PDZK1	5174	NM_001201326	1	1	1	3
hsa-miR-1185-2-3p	MIMAT0022713	PEX14	5195	NM_004565	1	1	1	3
hsa-miR-1185-2-3p	MIMAT0022713	PGAP1	80055	NM_024989	1	1	1	3
hsa-miR-1185-2-3p	MIMAT0022713	PHF13	148479	NM_153812	1	1	1	3
hsa-miR-1185-2-3p	MIMAT0022713	PHF3	23469	NM_015153	1	1	1	3
hsa-miR-1185-2-3p	MIMAT0022713	PHIP	55023	NM_017934	1	1	1	3
hsa-miR-1185-2-3p	MIMAT0022713	PHKA1	5255	NM_001122670	1	1	1	3
hsa-miR-1185-2-3p	MIMAT0022713	PHLDA1	22822	NM_007350	1	1	1	3
hsa-miR-1185-2-3p	MIMAT0022713	PIGW	284098	NM_178517	1	1	1	3
hsa-miR-1185-2-3p	MIMAT0022713	PLCXD3	345557	NM_001005473	1	1	1	3
hsa-miR-1185-2-3p	MIMAT0022713	PLEKHG1	57480	NM_001029884	1	1	1	3
hsa-miR-1185-2-3p	MIMAT0022713	PLSCR1	5359	NM_021105	1	1	1	3
hsa-miR-1185-2-3p	MIMAT0022713	PMAIP1	5366	NM_021127	1	1	1	3
hsa-miR-1185-2-3p	MIMAT0022713	PNN	5411	NM_002687	1	1	1	3
hsa-miR-1185-2-3p	MIMAT0022713	PNRC1	10957	NM_006813	1	1	1	3
hsa-miR-1185-2-3p	MIMAT0022713	POLI	11201	NM_007195	1	1	1	3
hsa-miR-1185-2-3p	MIMAT0022713	POLR3G	10622	NM_006467	1	1	1	3
hsa-miR-1185-2-3p	MIMAT0022713	POU4F2	5458	NM_004575	1	1	1	3
hsa-miR-1185-2-3p	MIMAT0022713	PPP1R9B	84687	NM_032595	1	1	1	3
hsa-miR-1185-2-3p	MIMAT0022713	PPP2CB	5516	NM_001009552	1	1	1	3
hsa-miR-1185-2-3p	MIMAT0022713	PPP2R5E	5529	NM_006246	1	1	1	3
hsa-miR-1185-2-3p	MIMAT0022713	PRDM1	639	NM_001198	1	1	1	3
hsa-miR-1185-2-3p	MIMAT0022713	PRDM16	63976	NM_022114	1	1	1	3
hsa-miR-1185-2-3p	MIMAT0022713	PREPL	9581	NM_001171606	1	1	1	3
hsa-miR-1185-2-3p	MIMAT0022713	PRICKLE1	144165	NM_001144881	1	1	1	3
hsa-miR-1185-2-3p	MIMAT0022713	PRKAA1	5562	NM_206907	1	1	1	3
hsa-miR-1185-2-3p	MIMAT0022713	PRKAG2	51422	NM_016203	1	1	1	3
hsa-miR-1185-2-3p	MIMAT0022713	PRKCA	5578	NM_002737	1	1	1	3
hsa-miR-1185-2-3p	MIMAT0022713	PRPF4B	8899	NM_003913	1	1	1	3
hsa-miR-1185-2-3p	MIMAT0022713	PRPS2	5634	NM_002765	1	1	1	3
hsa-miR-1185-2-3p	MIMAT0022713	PRR14L	253143	NM_173566	1	1	1	3
hsa-miR-1185-2-3p	MIMAT0022713	PRTG	283659	NM_173814	1	1	1	3
hsa-miR-1185-2-3p	MIMAT0022713	PSMA1	5682	NM_148976	1	1	1	3
hsa-miR-1185-2-3p	MIMAT0022713	PTGER3	5733	NM_198715	1	1	1	3
hsa-miR-1185-2-3p	MIMAT0022713	PTGFR	5737	NM_001039585	1	1	1	3
hsa-miR-1185-2-3p	MIMAT0022713	PTGS2	5743	NM_000963	1	1	1	3
hsa-miR-1185-2-3p	MIMAT0022713	PTPN3	5774	NM_001145370	1	1	1	3
hsa-miR-1185-2-3p	MIMAT0022713	PUM2	23369	NM_015317	1	1	1	3
hsa-miR-1185-2-3p	MIMAT0022713	PURA	5813	NM_005859	1	1	1	3
hsa-miR-1185-2-3p	MIMAT0022713	PWWP2A	114825	NM_001130864	1	1	1	3
hsa-miR-1185-2-3p	MIMAT0022713	QKI	9444	NM_006775	1	1	1	3
hsa-miR-1185-2-3p	MIMAT0022713	RAB14	51552	NM_016322	1	1	1	3
hsa-miR-1185-2-3p	MIMAT0022713	RAB18	22931	NM_021252	1	1	1	3
hsa-miR-1185-2-3p	MIMAT0022713	RAB2A	5862	NM_001242644	1	1	1	3
hsa-miR-1185-2-3p	MIMAT0022713	RAB3GAP2	25782	NM_012414	1	1	1	3
hsa-miR-1185-2-3p	MIMAT0022713	RALGPS2	55103	NM_152663	1	1	1	3
hsa-miR-1185-2-3p	MIMAT0022713	RAP1A	5906	NM_002884	1	1	1	3
hsa-miR-1185-2-3p	MIMAT0022713	RAP2B	5912	NM_002886	1	1	1	3
hsa-miR-1185-2-3p	MIMAT0022713	RAPGEF5	9771	NM_012294	1	1	1	3
hsa-miR-1185-2-3p	MIMAT0022713	RASA1	5921	NM_002890	1	1	1	3
hsa-miR-1185-2-3p	MIMAT0022713	RASSF8	11228	NM_001164747	1	1	1	3
hsa-miR-1185-2-3p	MIMAT0022713	RBM12	10137	NM_006047	1	1	1	3
hsa-miR-1185-2-3p	MIMAT0022713	RBM25	58517	NM_021239	1	1	1	3
hsa-miR-1185-2-3p	MIMAT0022713	RBM39	9584	NM_004902	1	1	1	3
hsa-miR-1185-2-3p	MIMAT0022713	RC3H1	149041	NM_172071	1	1	1	3
hsa-miR-1185-2-3p	MIMAT0022713	REG4	83998	NM_001159353	1	1	1	3
hsa-miR-1185-2-3p	MIMAT0022713	REL	5966	NM_002908	1	1	1	3
hsa-miR-1185-2-3p	MIMAT0022713	RGL1	23179	NM_015149	1	1	1	3
hsa-miR-1185-2-3p	MIMAT0022713	RGPD4	285190	NM_182588	1	1	1	3
hsa-miR-1185-2-3p	MIMAT0022713	RGPD5	84220	NM_005054	1	1	1	3
hsa-miR-1185-2-3p	MIMAT0022713	RGPD6	729540	NM_001123363	1	1	1	3
hsa-miR-1185-2-3p	MIMAT0022713	RGPD8	727851	NM_001164463	1	1	1	3
hsa-miR-1185-2-3p	MIMAT0022713	RGS4	5999	NM_005613	1	1	1	3
hsa-miR-1185-2-3p	MIMAT0022713	RHBDL3	162494	NM_138328	1	1	1	3
hsa-miR-1185-2-3p	MIMAT0022713	RIPPLY3	53820	NM_018962	1	1	1	3
hsa-miR-1185-2-3p	MIMAT0022713	RNF141	50862	NM_016422	1	1	1	3
hsa-miR-1185-2-3p	MIMAT0022713	RNF149	284996	NM_173647	1	1	1	3
hsa-miR-1185-2-3p	MIMAT0022713	RNF182	221687	NM_152737	1	1	1	3
hsa-miR-1185-2-3p	MIMAT0022713	RNF19A	25897	NM_015435	1	1	1	3
hsa-miR-1185-2-3p	MIMAT0022713	RNF220	55182	NM_018150	1	1	1	3
hsa-miR-1185-2-3p	MIMAT0022713	ROBO2	6092	NM_002942	1	1	1	3
hsa-miR-1185-2-3p	MIMAT0022713	ROCK1	6093	NM_005406	1	1	1	3
hsa-miR-1185-2-3p	MIMAT0022713	RORA	6095	NM_134261	1	1	1	3
hsa-miR-1185-2-3p	MIMAT0022713	RPGR	6103	NM_001034853	1	1	1	3
hsa-miR-1185-2-3p	MIMAT0022713	RPL22L1	200916	NM_001099645	1	1	1	3
hsa-miR-1185-2-3p	MIMAT0022713	RPRD1A	55197	NM_018170	1	1	1	3
hsa-miR-1185-2-3p	MIMAT0022713	RPS6KA1	6195	NM_001006665	1	1	1	3
hsa-miR-1185-2-3p	MIMAT0022713	RPS6KA6	27330	NM_014496	1	1	1	3
hsa-miR-1185-2-3p	MIMAT0022713	RSPO2	340419	NM_178565	1	1	1	3
hsa-miR-1185-2-3p	MIMAT0022713	RTN4	57142	NM_007008	1	1	1	3
hsa-miR-1185-2-3p	MIMAT0022713	SAA2	6289	NM_001127380	1	1	1	3
hsa-miR-1185-2-3p	MIMAT0022713	SALL1	6299	NM_002968	1	1	1	3
hsa-miR-1185-2-3p	MIMAT0022713	SAMD5	389432	NM_001030060	1	1	1	3
hsa-miR-1185-2-3p	MIMAT0022713	SATB1	6304	NM_002971	1	1	1	3
hsa-miR-1185-2-3p	MIMAT0022713	SAV1	60485	NM_021818	1	1	1	3
hsa-miR-1185-2-3p	MIMAT0022713	SCAI	286205	NM_001144877	1	1	1	3
hsa-miR-1185-2-3p	MIMAT0022713	SCN5A	6331	NM_001160161	1	1	1	3
hsa-miR-1185-2-3p	MIMAT0022713	SEC24D	9871	NM_014822	1	1	1	3
hsa-miR-1185-2-3p	MIMAT0022713	SEMA3D	223117	NM_152754	1	1	1	3
hsa-miR-1185-2-3p	MIMAT0022713	SERINC3	10955	NM_006811	1	1	1	3
hsa-miR-1185-2-3p	MIMAT0022713	SET	6418	NM_001122821	1	1	1	3
hsa-miR-1185-2-3p	MIMAT0022713	SFMBT2	57713	NM_001029880	1	1	1	3
hsa-miR-1185-2-3p	MIMAT0022713	SFPQ	6421	NM_005066	1	1	1	3
hsa-miR-1185-2-3p	MIMAT0022713	SFSWAP	6433	NM_004592	1	1	1	3
hsa-miR-1185-2-3p	MIMAT0022713	SGCD	6444	NM_172244	1	1	1	3
hsa-miR-1185-2-3p	MIMAT0022713	SGCG	6445	NM_000231	1	1	1	3
hsa-miR-1185-2-3p	MIMAT0022713	SH3TC2	79628	NM_024577	1	1	1	3
hsa-miR-1185-2-3p	MIMAT0022713	SHB	6461	NM_003028	1	1	1	3
hsa-miR-1185-2-3p	MIMAT0022713	SKP1	6500	NM_006930	1	1	1	3
hsa-miR-1185-2-3p	MIMAT0022713	SLAIN2	57606	NM_020846	1	1	1	3
hsa-miR-1185-2-3p	MIMAT0022713	SLC14A1	6563	NM_001146037	1	1	1	3
hsa-miR-1185-2-3p	MIMAT0022713	SLC15A5	729025	NM_001170798	1	1	1	3
hsa-miR-1185-2-3p	MIMAT0022713	SLC17A6	57084	NM_020346	1	1	1	3
hsa-miR-1185-2-3p	MIMAT0022713	SLC1A2	6506	NM_004171	1	1	1	3
hsa-miR-1185-2-3p	MIMAT0022713	SLC22A10	387775	NM_001039752	1	1	1	3
hsa-miR-1185-2-3p	MIMAT0022713	SLC22A3	6581	NM_021977	1	1	1	3
hsa-miR-1185-2-3p	MIMAT0022713	SLC25A21	89874	NM_030631	1	1	1	3
hsa-miR-1185-2-3p	MIMAT0022713	SLC2A13	114134	NM_052885	1	1	1	3
hsa-miR-1185-2-3p	MIMAT0022713	SLC30A5	64924	NM_022902	1	1	1	3
hsa-miR-1185-2-3p	MIMAT0022713	SLC33A1	9197	NM_004733	1	1	1	3
hsa-miR-1185-2-3p	MIMAT0022713	SLC35A3	23443	NM_012243	1	1	1	3
hsa-miR-1185-2-3p	MIMAT0022713	SLC35E1	79939	NM_024881	1	1	1	3
hsa-miR-1185-2-3p	MIMAT0022713	SLC37A3	84255	NM_032295	1	1	1	3
hsa-miR-1185-2-3p	MIMAT0022713	SLC39A14	23516	NM_001135154	1	1	1	3
hsa-miR-1185-2-3p	MIMAT0022713	SLC39A8	64116	NM_001135147	1	1	1	3
hsa-miR-1185-2-3p	MIMAT0022713	SLC44A1	23446	NM_080546	1	1	1	3
hsa-miR-1185-2-3p	MIMAT0022713	SLC6A15	55117	NM_001146335	1	1	1	3
hsa-miR-1185-2-3p	MIMAT0022713	SLC7A11	23657	NM_014331	1	1	1	3
hsa-miR-1185-2-3p	MIMAT0022713	SLK	9748	NM_014720	1	1	1	3
hsa-miR-1185-2-3p	MIMAT0022713	SMARCA4	6597	NM_001128848	1	1	1	3
hsa-miR-1185-2-3p	MIMAT0022713	SMNDC1	10285	NM_005871	1	1	1	3
hsa-miR-1185-2-3p	MIMAT0022713	SMOC1	64093	NM_001034852	1	1	1	3
hsa-miR-1185-2-3p	MIMAT0022713	SNAP91	9892	NM_001242794	1	1	1	3
hsa-miR-1185-2-3p	MIMAT0022713	SNCA	6622	NM_000345	1	1	1	3
hsa-miR-1185-2-3p	MIMAT0022713	SNX33	257364	NM_153271	1	1	1	3
hsa-miR-1185-2-3p	MIMAT0022713	SOCS7	30837	NM_014598	1	1	1	3
hsa-miR-1185-2-3p	MIMAT0022713	SOD2	6648	NM_000636	1	1	1	3
hsa-miR-1185-2-3p	MIMAT0022713	SON	6651	NM_032195	1	1	1	3
hsa-miR-1185-2-3p	MIMAT0022713	SORL1	6653	NM_003105	1	1	1	3
hsa-miR-1185-2-3p	MIMAT0022713	SORT1	6272	NM_002959	1	1	1	3
hsa-miR-1185-2-3p	MIMAT0022713	SOX9	6662	NM_000346	1	1	1	3
hsa-miR-1185-2-3p	MIMAT0022713	SPAG9	9043	NM_001251971	1	1	1	3
hsa-miR-1185-2-3p	MIMAT0022713	SPAST	6683	NM_014946	1	1	1	3
hsa-miR-1185-2-3p	MIMAT0022713	SPATA13	221178	NM_001166271	1	1	1	3
hsa-miR-1185-2-3p	MIMAT0022713	SRSF12	135295	NM_080743	1	1	1	3
hsa-miR-1185-2-3p	MIMAT0022713	ST3GAL6	10402	NM_006100	1	1	1	3
hsa-miR-1185-2-3p	MIMAT0022713	ST8SIA3	51046	NM_015879	1	1	1	3
hsa-miR-1185-2-3p	MIMAT0022713	STAG2	10735	NM_001042750	1	1	1	3
hsa-miR-1185-2-3p	MIMAT0022713	STARD13	90627	NM_001243476	1	1	1	3
hsa-miR-1185-2-3p	MIMAT0022713	STIM2	57620	NM_001169117	1	1	1	3
hsa-miR-1185-2-3p	MIMAT0022713	STK10	6793	NM_005990	1	1	1	3
hsa-miR-1185-2-3p	MIMAT0022713	STRN	6801	NM_003162	1	1	1	3
hsa-miR-1185-2-3p	MIMAT0022713	STRN4	29888	NM_013403	1	1	1	3
hsa-miR-1185-2-3p	MIMAT0022713	STXBP1	6812	NM_003165	1	1	1	3
hsa-miR-1185-2-3p	MIMAT0022713	STXBP5L	9515	NM_014980	1	1	1	3
hsa-miR-1185-2-3p	MIMAT0022713	STYX	6815	NM_145251	1	1	1	3
hsa-miR-1185-2-3p	MIMAT0022713	SUN1	23353	NM_025154	1	1	1	3
hsa-miR-1185-2-3p	MIMAT0022713	SUSD5	26032	NM_015551	1	1	1	3
hsa-miR-1185-2-3p	MIMAT0022713	SYDE2	84144	NM_032184	1	1	1	3
hsa-miR-1185-2-3p	MIMAT0022713	TAP2	6891	NM_000544	1	1	1	3
hsa-miR-1185-2-3p	MIMAT0022713	TBK1	29110	NM_013254	1	1	1	3
hsa-miR-1185-2-3p	MIMAT0022713	TCF7L2	6934	NM_001146285	1	1	1	3
hsa-miR-1185-2-3p	MIMAT0022713	TEK	7010	NM_000459	1	1	1	3
hsa-miR-1185-2-3p	MIMAT0022713	TENM1	10178	NM_001163279	1	1	1	3
hsa-miR-1185-2-3p	MIMAT0022713	TFAP2A	7020	NM_003220	1	1	1	3
hsa-miR-1185-2-3p	MIMAT0022713	TFDP2	7029	NM_001178138	1	1	1	3
hsa-miR-1185-2-3p	MIMAT0022713	TGFBR3	7049	NM_003243	1	1	1	3
hsa-miR-1185-2-3p	MIMAT0022713	TIFA	92610	NM_052864	1	1	1	3
hsa-miR-1185-2-3p	MIMAT0022713	TIMP3	7078	NM_000362	1	1	1	3
hsa-miR-1185-2-3p	MIMAT0022713	TLE4	7091	NM_007005	1	1	1	3
hsa-miR-1185-2-3p	MIMAT0022713	TLR4	7099	NM_138554	1	1	1	3
hsa-miR-1185-2-3p	MIMAT0022713	TMEM135	65084	NM_001168724	1	1	1	3
hsa-miR-1185-2-3p	MIMAT0022713	TMEM161B	153396	NM_153354	1	1	1	3
hsa-miR-1185-2-3p	MIMAT0022713	TMEM167A	153339	NM_174909	1	1	1	3
hsa-miR-1185-2-3p	MIMAT0022713	TMEM2	23670	NM_001135820	1	1	1	3
hsa-miR-1185-2-3p	MIMAT0022713	TMEM47	83604	NM_031442	1	1	1	3
hsa-miR-1185-2-3p	MIMAT0022713	TMEM67	91147	NM_153704	1	1	1	3
hsa-miR-1185-2-3p	MIMAT0022713	TMPO	7112	NM_003276	1	1	1	3
hsa-miR-1185-2-3p	MIMAT0022713	TNC	3371	NM_002160	1	1	1	3
hsa-miR-1185-2-3p	MIMAT0022713	TNFRSF11B	4982	NM_002546	1	1	1	3
hsa-miR-1185-2-3p	MIMAT0022713	TNPO1	3842	NM_153188	1	1	1	3
hsa-miR-1185-2-3p	MIMAT0022713	TOB1	10140	NM_005749	1	1	1	3
hsa-miR-1185-2-3p	MIMAT0022713	TOR1AIP2	163590	NM_145034	1	1	1	3
hsa-miR-1185-2-3p	MIMAT0022713	TP53INP1	94241	NM_001135733	1	1	1	3
hsa-miR-1185-2-3p	MIMAT0022713	TPD52	7163	NM_001025252	1	1	1	3
hsa-miR-1185-2-3p	MIMAT0022713	TRAF3IP1	26146	NM_015650	1	1	1	3
hsa-miR-1185-2-3p	MIMAT0022713	TRAPPC3L	100128327	NM_001139444	1	1	1	3
hsa-miR-1185-2-3p	MIMAT0022713	TRAPPC4	51399	NM_016146	1	1	1	3
hsa-miR-1185-2-3p	MIMAT0022713	TRAPPC6B	122553	NM_001079537	1	1	1	3
hsa-miR-1185-2-3p	MIMAT0022713	TRDMT1	1787	NM_004412	1	1	1	3
hsa-miR-1185-2-3p	MIMAT0022713	TRIB1	10221	NM_025195	1	1	1	3
hsa-miR-1185-2-3p	MIMAT0022713	TRIM13	10206	NM_213590	1	1	1	3
hsa-miR-1185-2-3p	MIMAT0022713	TRIM52	84851	NM_032765	1	1	1	3
hsa-miR-1185-2-3p	MIMAT0022713	TRIM61	391712	NM_001012414	1	1	1	3
hsa-miR-1185-2-3p	MIMAT0022713	TRIP4	9325	NM_016213	1	1	1	3
hsa-miR-1185-2-3p	MIMAT0022713	TRMT1L	81627	NM_030934	1	1	1	3
hsa-miR-1185-2-3p	MIMAT0022713	TSC22D1	8848	NM_006022	1	1	1	3
hsa-miR-1185-2-3p	MIMAT0022713	TSEN34	79042	NM_024075	1	1	1	3
hsa-miR-1185-2-3p	MIMAT0022713	TSPAN12	23554	NM_012338	1	1	1	3
hsa-miR-1185-2-3p	MIMAT0022713	TSPAN2	10100	NM_005725	1	1	1	3
hsa-miR-1185-2-3p	MIMAT0022713	TTC28	23331	NM_001145418	1	1	1	3
hsa-miR-1185-2-3p	MIMAT0022713	TUBGCP5	114791	NM_052903	1	1	1	3
hsa-miR-1185-2-3p	MIMAT0022713	TXLNB	167838	NM_153235	1	1	1	3
hsa-miR-1185-2-3p	MIMAT0022713	TXLNG	55787	NM_018360	1	1	1	3
hsa-miR-1185-2-3p	MIMAT0022713	TYRP1	7306	NM_000550	1	1	1	3
hsa-miR-1185-2-3p	MIMAT0022713	UBE2C	11065	NM_181801	1	1	1	3
hsa-miR-1185-2-3p	MIMAT0022713	UBE2D1	7321	NM_001204880	1	1	1	3
hsa-miR-1185-2-3p	MIMAT0022713	UBE2W	55284	NM_018299	1	1	1	3
hsa-miR-1185-2-3p	MIMAT0022713	UBE2Z	65264	NM_023079	1	1	1	3
hsa-miR-1185-2-3p	MIMAT0022713	UBN2	254048	NM_173569	1	1	1	3
hsa-miR-1185-2-3p	MIMAT0022713	UBR1	197131	NM_174916	1	1	1	3
hsa-miR-1185-2-3p	MIMAT0022713	UBR3	130507	NM_172070	1	1	1	3
hsa-miR-1185-2-3p	MIMAT0022713	UHRF1	29128	NM_001048201	1	1	1	3
hsa-miR-1185-2-3p	MIMAT0022713	ULBP1	80329	NM_025218	1	1	1	3
hsa-miR-1185-2-3p	MIMAT0022713	UNC119	9094	NM_054035	1	1	1	3
hsa-miR-1185-2-3p	MIMAT0022713	UPRT	139596	NM_145052	1	1	1	3
hsa-miR-1185-2-3p	MIMAT0022713	UQCRB	7381	NM_001199975	1	1	1	3
hsa-miR-1185-2-3p	MIMAT0022713	USP1	7398	NM_001017415	1	1	1	3
hsa-miR-1185-2-3p	MIMAT0022713	USP45	85015	NM_001080481	1	1	1	3
hsa-miR-1185-2-3p	MIMAT0022713	USP48	84196	NM_001032730	1	1	1	3
hsa-miR-1185-2-3p	MIMAT0022713	USP6	9098	NM_004505	1	1	1	3
hsa-miR-1185-2-3p	MIMAT0022713	USP6NL	9712	NM_014688	1	1	1	3
hsa-miR-1185-2-3p	MIMAT0022713	VAMP4	8674	NM_001185127	1	1	1	3
hsa-miR-1185-2-3p	MIMAT0022713	VCAM1	7412	NM_001199834	1	1	1	3
hsa-miR-1185-2-3p	MIMAT0022713	VCAN	1462	NM_001164098	1	1	1	3
hsa-miR-1185-2-3p	MIMAT0022713	VCL	7414	NM_003373	1	1	1	3
hsa-miR-1185-2-3p	MIMAT0022713	VIMP	55829	NM_018445	1	1	1	3
hsa-miR-1185-2-3p	MIMAT0022713	VPS13A	23230	NM_033305	1	1	1	3
hsa-miR-1185-2-3p	MIMAT0022713	WASF2	10163	NM_001201404	1	1	1	3
hsa-miR-1185-2-3p	MIMAT0022713	WASL	8976	NM_003941	1	1	1	3
hsa-miR-1185-2-3p	MIMAT0022713	WDR17	116966	NM_170710	1	1	1	3
hsa-miR-1185-2-3p	MIMAT0022713	WDR33	55339	NM_001006623	1	1	1	3
hsa-miR-1185-2-3p	MIMAT0022713	WDR37	22884	NM_014023	1	1	1	3
hsa-miR-1185-2-3p	MIMAT0022713	WDR60	55112	NM_018051	1	1	1	3
hsa-miR-1185-2-3p	MIMAT0022713	WDR72	256764	NM_182758	1	1	1	3
hsa-miR-1185-2-3p	MIMAT0022713	WDR82	80335	NM_025222	1	1	1	3
hsa-miR-1185-2-3p	MIMAT0022713	WT1	7490	NM_024426	1	1	1	3
hsa-miR-1185-2-3p	MIMAT0022713	XDH	7498	NM_000379	1	1	1	3
hsa-miR-1185-2-3p	MIMAT0022713	XIAP	331	NM_001167	1	1	1	3
hsa-miR-1185-2-3p	MIMAT0022713	YAF2	10138	NM_001190980	1	1	1	3
hsa-miR-1185-2-3p	MIMAT0022713	YPEL3	83719	NM_001145524	1	1	1	3
hsa-miR-1185-2-3p	MIMAT0022713	ZBTB38	253461	NM_001080412	1	1	1	3
hsa-miR-1185-2-3p	MIMAT0022713	ZBTB41	360023	NM_194314	1	1	1	3
hsa-miR-1185-2-3p	MIMAT0022713	ZBTB44	29068	NM_014155	1	1	1	3
hsa-miR-1185-2-3p	MIMAT0022713	ZBTB5	9925	NM_014872	1	1	1	3
hsa-miR-1185-2-3p	MIMAT0022713	ZC3H6	376940	NM_198581	1	1	1	3
hsa-miR-1185-2-3p	MIMAT0022713	ZCCHC24	219654	NM_153367	1	1	1	3
hsa-miR-1185-2-3p	MIMAT0022713	ZCCHC8	55596	NM_017612	1	1	1	3
hsa-miR-1185-2-3p	MIMAT0022713	ZFPM2	23414	NM_012082	1	1	1	3
hsa-miR-1185-2-3p	MIMAT0022713	ZFX	7543	NM_001178095	1	1	1	3
hsa-miR-1185-2-3p	MIMAT0022713	ZNF10	7556	NM_015394	1	1	1	3
hsa-miR-1185-2-3p	MIMAT0022713	ZNF140	7699	NM_003440	1	1	1	3
hsa-miR-1185-2-3p	MIMAT0022713	ZNF248	57209	NM_021045	1	1	1	3
hsa-miR-1185-2-3p	MIMAT0022713	ZNF250	58500	NM_021061	1	1	1	3
hsa-miR-1185-2-3p	MIMAT0022713	ZNF280D	54816	NM_017661	1	1	1	3
hsa-miR-1185-2-3p	MIMAT0022713	ZNF292	23036	NM_015021	1	1	1	3
hsa-miR-1185-2-3p	MIMAT0022713	ZNF441	126068	NM_152355	1	1	1	3
hsa-miR-1185-2-3p	MIMAT0022713	ZNF608	57507	NM_020747	1	1	1	3
hsa-miR-1185-2-3p	MIMAT0022713	ZNF638	27332	NM_014497	1	1	1	3
hsa-miR-1185-2-3p	MIMAT0022713	ZNF639	51193	NM_016331	1	1	1	3
hsa-miR-1185-2-3p	MIMAT0022713	ZNF652	22834	NM_014897	1	1	1	3
hsa-miR-1185-2-3p	MIMAT0022713	ZNF680	340252	NM_001130022	1	1	1	3
hsa-miR-1185-2-3p	MIMAT0022713	ZNF709	163051	NM_152601	1	1	1	3
hsa-miR-1185-2-3p	MIMAT0022713	ZNF721	170960	NM_133474	1	1	1	3
hsa-miR-1185-2-3p	MIMAT0022713	ZNF746	155061	NM_001163474	1	1	1	3
hsa-miR-1185-2-3p	MIMAT0022713	ZNF780B	163131	NM_001005851	1	1	1	3
hsa-miR-1185-2-3p	MIMAT0022713	ZSWIM6	57688	NM_020928	1	1	1	3
hsa-miR-1185-2-3p	MIMAT0022713	ZYG11B	79699	NM_024646	1	1	1	3
hsa-miR-1227-3p	MIMAT0005580	ACBD7	414149	NM_001039844	1	1	1	3
hsa-miR-1227-3p	MIMAT0005580	ARID4B	51742	NM_016374	1	1	1	3
hsa-miR-1227-3p	MIMAT0005580	ATP6V1B2	526	NM_001693	1	1	1	3
hsa-miR-1227-3p	MIMAT0005580	C5	727	NM_001735	1	1	1	3
hsa-miR-1227-3p	MIMAT0005580	CD109	135228	NM_133493	1	1	1	3
hsa-miR-1227-3p	MIMAT0005580	CRX	1406	NM_000554	1	1	1	3
hsa-miR-1227-3p	MIMAT0005580	CSRNP3	80034	NM_024969	1	1	1	3
hsa-miR-1227-3p	MIMAT0005580	FAM47E	100129583	NM_001136570	1	1	1	3
hsa-miR-1227-3p	MIMAT0005580	GNAZ	2781	NM_002073	1	1	1	3
hsa-miR-1227-3p	MIMAT0005580	GPLD1	2822	NM_001503	1	1	1	3
hsa-miR-1227-3p	MIMAT0005580	GPR26	2849	NM_153442	1	1	1	3
hsa-miR-1227-3p	MIMAT0005580	KREMEN1	83999	NM_032045	1	1	1	3
hsa-miR-1227-3p	MIMAT0005580	LRP10	26020	NM_014045	1	1	1	3
hsa-miR-1227-3p	MIMAT0005580	MANEAL	149175	NM_001031740	1	1	1	3
hsa-miR-1227-3p	MIMAT0005580	METTL16	79066	NM_024086	1	1	1	3
hsa-miR-1227-3p	MIMAT0005580	MIS12	79003	NM_024039	1	1	1	3
hsa-miR-1227-3p	MIMAT0005580	NOM1	64434	NM_138400	1	1	1	3
hsa-miR-1227-3p	MIMAT0005580	NUP62	23636	NM_153719	1	1	1	3
hsa-miR-1227-3p	MIMAT0005580	ODF2L	57489	NM_020729	1	1	1	3
hsa-miR-1227-3p	MIMAT0005580	ORC4	5000	NM_181742	1	1	1	3
hsa-miR-1227-3p	MIMAT0005580	PCSK1	5122	NM_001177875	1	1	1	3
hsa-miR-1227-3p	MIMAT0005580	PON3	5446	NM_000940	1	1	1	3
hsa-miR-1227-3p	MIMAT0005580	PPP2R5C	5527	NM_001161725	1	1	1	3
hsa-miR-1227-3p	MIMAT0005580	PRKAB2	5565	NM_005399	1	1	1	3
hsa-miR-1227-3p	MIMAT0005580	PSMB2	5690	NM_001199780	1	1	1	3
hsa-miR-1227-3p	MIMAT0005580	PTGFRN	5738	NM_020440	1	1	1	3
hsa-miR-1227-3p	MIMAT0005580	RAB4A	5867	NM_004578	1	1	1	3
hsa-miR-1227-3p	MIMAT0005580	RAD1	5810	NM_002853	1	1	1	3
hsa-miR-1227-3p	MIMAT0005580	RBBP4	5928	NM_001135255	1	1	1	3
hsa-miR-1227-3p	MIMAT0005580	RPH3AL	9501	NM_001190412	1	1	1	3
hsa-miR-1227-3p	MIMAT0005580	SULT1E1	6783	NM_005420	1	1	1	3
hsa-miR-1227-3p	MIMAT0005580	VAMP1	6843	NM_199245	1	1	1	3
hsa-miR-1227-3p	MIMAT0005580	ZBTB40	9923	NM_014870	1	1	1	3
hsa-miR-1227-3p	MIMAT0005580	ZNF268	10795	NM_001165887	1	1	1	3
hsa-miR-1227-3p	MIMAT0005580	ZNF562	54811	NM_001130032	1	1	1	3
hsa-miR-1246	MIMAT0005898	ACVR2A	92	NM_001616	1	1	1	3
hsa-miR-1246	MIMAT0005898	ADAM22	53616	NM_021722	1	1	1	3
hsa-miR-1246	MIMAT0005898	AFF3	3899	NM_002285	1	1	1	3
hsa-miR-1246	MIMAT0005898	AGL	178	NM_000642	1	1	1	3
hsa-miR-1246	MIMAT0005898	AGPS	8540	NM_003659	1	1	1	3
hsa-miR-1246	MIMAT0005898	AKAP2	11217	NM_001004065	1	1	1	3
hsa-miR-1246	MIMAT0005898	ALDH7A1	501	NM_001201377	1	1	1	3
hsa-miR-1246	MIMAT0005898	ALG10B	144245	NM_001013620	1	1	1	3
hsa-miR-1246	MIMAT0005898	AMMECR1	9949	NM_001171689	1	1	1	3
hsa-miR-1246	MIMAT0005898	ANKFY1	51479	NM_016376	1	1	1	3
hsa-miR-1246	MIMAT0005898	ANKRD34C	390616	NM_001146341	1	1	1	3
hsa-miR-1246	MIMAT0005898	ANTXR2	118429	NM_058172	1	1	1	3
hsa-miR-1246	MIMAT0005898	ARFIP1	27236	NM_001025593	1	1	1	3
hsa-miR-1246	MIMAT0005898	ARL4C	10123	NM_005737	1	1	1	3
hsa-miR-1246	MIMAT0005898	ARSJ	79642	NM_024590	1	1	1	3
hsa-miR-1246	MIMAT0005898	ATF1	466	NM_005171	1	1	1	3
hsa-miR-1246	MIMAT0005898	ATP1B1	481	NM_001677	1	1	1	3
hsa-miR-1246	MIMAT0005898	ATP2B1	490	NM_001001323	1	1	1	3
hsa-miR-1246	MIMAT0005898	ATRX	546	NM_000489	1	1	1	3
hsa-miR-1246	MIMAT0005898	AXIN2	8313	NM_004655	1	1	1	3
hsa-miR-1246	MIMAT0005898	BACH1	571	NM_206866	1	1	1	3
hsa-miR-1246	MIMAT0005898	BCL2L2	599	NM_001199839	1	1	1	3
hsa-miR-1246	MIMAT0005898	BEND4	389206	NM_207406	1	1	1	3
hsa-miR-1246	MIMAT0005898	BEND7	222389	NM_001100912	1	1	1	3
hsa-miR-1246	MIMAT0005898	BRWD1	54014	NM_033656	1	1	1	3
hsa-miR-1246	MIMAT0005898	C10orf90	118611	NM_001004298	1	1	1	3
hsa-miR-1246	MIMAT0005898	C11orf54	28970	NM_014039	1	1	1	3
hsa-miR-1246	MIMAT0005898	C1orf52	148423	NM_198077	1	1	1	3
hsa-miR-1246	MIMAT0005898	C20orf26	26074	NM_015585	1	1	1	3
hsa-miR-1246	MIMAT0005898	C3orf43	255798	NM_001077657	1	1	1	3
hsa-miR-1246	MIMAT0005898	C4orf40	401137	NM_214711	1	1	1	3
hsa-miR-1246	MIMAT0005898	C4orf50	389197	XM_003119922	1	1	1	3
hsa-miR-1246	MIMAT0005898	C9	735	NM_001737	1	1	1	3
hsa-miR-1246	MIMAT0005898	CALB1	793	NM_004929	1	1	1	3
hsa-miR-1246	MIMAT0005898	CAMK2G	818	NM_172170	1	1	1	3
hsa-miR-1246	MIMAT0005898	CASP14	23581	NM_012114	1	1	1	3
hsa-miR-1246	MIMAT0005898	CCDC176	80127	NM_025057	1	1	1	3
hsa-miR-1246	MIMAT0005898	CCNG2	901	NM_004354	1	1	1	3
hsa-miR-1246	MIMAT0005898	CFLAR	8837	NM_001202516	1	1	1	3
hsa-miR-1246	MIMAT0005898	CHST9	83539	NM_031422	1	1	1	3
hsa-miR-1246	MIMAT0005898	CISD1	55847	NM_018464	1	1	1	3
hsa-miR-1246	MIMAT0005898	CLCC1	23155	NM_001048210	1	1	1	3
hsa-miR-1246	MIMAT0005898	CLEC4C	170482	NM_203503	1	1	1	3
hsa-miR-1246	MIMAT0005898	CLVS1	157807	NM_173519	1	1	1	3
hsa-miR-1246	MIMAT0005898	CMTM6	54918	NM_017801	1	1	1	3
hsa-miR-1246	MIMAT0005898	COG6	57511	NM_001145079	1	1	1	3
hsa-miR-1246	MIMAT0005898	CREBL2	1389	NM_001310	1	1	1	3
hsa-miR-1246	MIMAT0005898	CSRNP3	80034	NM_024969	1	1	1	3
hsa-miR-1246	MIMAT0005898	CTSC	1075	NM_001114173	1	1	1	3
hsa-miR-1246	MIMAT0005898	DCC	1630	NM_005215	1	1	1	3
hsa-miR-1246	MIMAT0005898	DCLK1	9201	NM_001195430	1	1	1	3
hsa-miR-1246	MIMAT0005898	DCP2	167227	NM_001242377	1	1	1	3
hsa-miR-1246	MIMAT0005898	DCX	1641	NM_178151	1	1	1	3
hsa-miR-1246	MIMAT0005898	DDI1	414301	NM_001001711	1	1	1	3
hsa-miR-1246	MIMAT0005898	DENND2D	79961	NM_024901	1	1	1	3
hsa-miR-1246	MIMAT0005898	DERA	51071	NM_015954	1	1	1	3
hsa-miR-1246	MIMAT0005898	DLG1	1739	NM_004087	1	1	1	3
hsa-miR-1246	MIMAT0005898	DMRT2	10655	NM_006557	1	1	1	3
hsa-miR-1246	MIMAT0005898	DNAJB14	79982	NM_001031723	1	1	1	3
hsa-miR-1246	MIMAT0005898	DNAJC12	56521	NM_021800	1	1	1	3
hsa-miR-1246	MIMAT0005898	DOK3	79930	NM_001144875	1	1	1	3
hsa-miR-1246	MIMAT0005898	DTL	51514	NM_016448	1	1	1	3
hsa-miR-1246	MIMAT0005898	DUSP18	150290	NM_152511	1	1	1	3
hsa-miR-1246	MIMAT0005898	DYRK1A	1859	NM_101395	1	1	1	3
hsa-miR-1246	MIMAT0005898	E2F8	79733	NM_024680	1	1	1	3
hsa-miR-1246	MIMAT0005898	EDA	1896	NM_001005609	1	1	1	3
hsa-miR-1246	MIMAT0005898	ELMOD2	255520	NM_153702	1	1	1	3
hsa-miR-1246	MIMAT0005898	ENDOV	284131	NM_001164637	1	1	1	3
hsa-miR-1246	MIMAT0005898	ERBB4	2066	NM_005235	1	1	1	3
hsa-miR-1246	MIMAT0005898	ERCC4	2072	NM_005236	1	1	1	3
hsa-miR-1246	MIMAT0005898	ERO1LB	56605	NM_019891	1	1	1	3
hsa-miR-1246	MIMAT0005898	EXOSC9	5393	NM_001034194	1	1	1	3
hsa-miR-1246	MIMAT0005898	F8A1	8263	NM_012151	1	1	1	3
hsa-miR-1246	MIMAT0005898	FAM122B	159090	NM_001166600	1	1	1	3
hsa-miR-1246	MIMAT0005898	FAM151B	167555	NM_205548	1	1	1	3
hsa-miR-1246	MIMAT0005898	FAM199X	139231	NM_207318	1	1	1	3
hsa-miR-1246	MIMAT0005898	FAM19A5	25817	NM_001082967	1	1	1	3
hsa-miR-1246	MIMAT0005898	FAM53C	51307	NM_001135647	1	1	1	3
hsa-miR-1246	MIMAT0005898	FAM98A	25940	NM_015475	1	1	1	3
hsa-miR-1246	MIMAT0005898	FAXC	84553	NM_032511	1	1	1	3
hsa-miR-1246	MIMAT0005898	FBXL20	84961	NM_001184906	1	1	1	3
hsa-miR-1246	MIMAT0005898	FGF5	2250	NM_004464	1	1	1	3
hsa-miR-1246	MIMAT0005898	FIGF	2277	NM_004469	1	1	1	3
hsa-miR-1246	MIMAT0005898	FMNL3	91010	NM_198900	1	1	1	3
hsa-miR-1246	MIMAT0005898	FNDC3A	22862	NM_001079673	1	1	1	3
hsa-miR-1246	MIMAT0005898	FOPNL	123811	NM_144600	1	1	1	3
hsa-miR-1246	MIMAT0005898	FRMD6	122786	NM_001042481	1	1	1	3
hsa-miR-1246	MIMAT0005898	FSTL5	56884	NM_020116	1	1	1	3
hsa-miR-1246	MIMAT0005898	FUT9	10690	NM_006581	1	1	1	3
hsa-miR-1246	MIMAT0005898	GALNT15	117248	NM_054110	1	1	1	3
hsa-miR-1246	MIMAT0005898	GANC	2595	NM_198141	1	1	1	3
hsa-miR-1246	MIMAT0005898	GDAP1	54332	NM_018972	1	1	1	3
hsa-miR-1246	MIMAT0005898	GIGYF2	26058	NM_015575	1	1	1	3
hsa-miR-1246	MIMAT0005898	GLIPR1	11010	NM_006851	1	1	1	3
hsa-miR-1246	MIMAT0005898	GOLGA1	2800	NM_002077	1	1	1	3
hsa-miR-1246	MIMAT0005898	GPR12	2835	NM_005288	1	1	1	3
hsa-miR-1246	MIMAT0005898	GPR161	23432	NM_153832	1	1	1	3
hsa-miR-1246	MIMAT0005898	GPR85	54329	NM_001146265	1	1	1	3
hsa-miR-1246	MIMAT0005898	GRAMD2	196996	NM_001012642	1	1	1	3
hsa-miR-1246	MIMAT0005898	GRHL2	79977	NM_024915	1	1	1	3
hsa-miR-1246	MIMAT0005898	GSG1L	146395	NM_001109763	1	1	1	3
hsa-miR-1246	MIMAT0005898	GSK3B	2932	NM_001146156	1	1	1	3
hsa-miR-1246	MIMAT0005898	GTF2H5	404672	NM_207118	1	1	1	3
hsa-miR-1246	MIMAT0005898	GUCY1A3	2982	NM_001130683	1	1	1	3
hsa-miR-1246	MIMAT0005898	GYG2	8908	NM_001079855	1	1	1	3
hsa-miR-1246	MIMAT0005898	GYS2	2998	NM_021957	1	1	1	3
hsa-miR-1246	MIMAT0005898	HELZ	9931	NM_014877	1	1	1	3
hsa-miR-1246	MIMAT0005898	HLF	3131	NM_002126	1	1	1	3
hsa-miR-1246	MIMAT0005898	INPP4B	8821	NM_003866	1	1	1	3
hsa-miR-1246	MIMAT0005898	IRAK2	3656	NM_001570	1	1	1	3
hsa-miR-1246	MIMAT0005898	ISCA1	81689	NM_030940	1	1	1	3
hsa-miR-1246	MIMAT0005898	IYD	389434	NM_001164694	1	1	1	3
hsa-miR-1246	MIMAT0005898	KANSL3	55683	NM_001115016	1	1	1	3
hsa-miR-1246	MIMAT0005898	KAT2B	8850	NM_003884	1	1	1	3
hsa-miR-1246	MIMAT0005898	KCNAB1	7881	NM_003471	1	1	1	3
hsa-miR-1246	MIMAT0005898	KCNQ3	3786	NM_004519	1	1	1	3
hsa-miR-1246	MIMAT0005898	KDM5A	5927	NM_001042603	1	1	1	3
hsa-miR-1246	MIMAT0005898	KIAA0196	9897	NM_014846	1	1	1	3
hsa-miR-1246	MIMAT0005898	KIAA0355	9710	NM_014686	1	1	1	3
hsa-miR-1246	MIMAT0005898	KIAA0825	285600	NM_173665	1	1	1	3
hsa-miR-1246	MIMAT0005898	KIAA1715	80856	NM_030650	1	1	1	3
hsa-miR-1246	MIMAT0005898	KIF13A	63971	NM_001243423	1	1	1	3
hsa-miR-1246	MIMAT0005898	KITLG	4254	NM_003994	1	1	1	3
hsa-miR-1246	MIMAT0005898	KLC1	3831	NM_005552	1	1	1	3
hsa-miR-1246	MIMAT0005898	LAX1	54900	NM_001136190	1	1	1	3
hsa-miR-1246	MIMAT0005898	LIN54	132660	NM_001115008	1	1	1	3
hsa-miR-1246	MIMAT0005898	LOC400682	400682	XM_001732878	1	1	1	3
hsa-miR-1246	MIMAT0005898	LRIT2	340745	NM_001017924	1	1	1	3
hsa-miR-1246	MIMAT0005898	LRRTM2	26045	NM_015564	1	1	1	3
hsa-miR-1246	MIMAT0005898	LY75	4065	NM_002349	1	1	1	3
hsa-miR-1246	MIMAT0005898	MALT1	10892	NM_173844	1	1	1	3
hsa-miR-1246	MIMAT0005898	MARCHF3	115123	NM_178450	1	1	1	3
hsa-miR-1246	MIMAT0005898	MBNL3	55796	NM_001170704	1	1	1	3
hsa-miR-1246	MIMAT0005898	MCCC2	64087	NM_022132	1	1	1	3
hsa-miR-1246	MIMAT0005898	MCTP1	79772	NM_024717	1	1	1	3
hsa-miR-1246	MIMAT0005898	MED22	6837	NM_181491	1	1	1	3
hsa-miR-1246	MIMAT0005898	METAP2	10988	NM_006838	1	1	1	3
hsa-miR-1246	MIMAT0005898	MIER3	166968	NM_152622	1	1	1	3
hsa-miR-1246	MIMAT0005898	MITF	4286	NM_006722	1	1	1	3
hsa-miR-1246	MIMAT0005898	MPZ	4359	NM_000530	1	1	1	3
hsa-miR-1246	MIMAT0005898	MRI1	84245	NM_032285	1	1	1	3
hsa-miR-1246	MIMAT0005898	MRPL19	9801	NM_014763	1	1	1	3
hsa-miR-1246	MIMAT0005898	MSN	4478	NM_002444	1	1	1	3
hsa-miR-1246	MIMAT0005898	MSR1	4481	NM_138716	1	1	1	3
hsa-miR-1246	MIMAT0005898	MUT	4594	NM_000255	1	1	1	3
hsa-miR-1246	MIMAT0005898	NCAPH	23397	NM_015341	1	1	1	3
hsa-miR-1246	MIMAT0005898	NDUFA5	4698	NM_005000	1	1	1	3
hsa-miR-1246	MIMAT0005898	NIPBL	25836	NM_133433	1	1	1	3
hsa-miR-1246	MIMAT0005898	NLRP3	114548	NM_004895	1	1	1	3
hsa-miR-1246	MIMAT0005898	NPAT	4863	NM_002519	1	1	1	3
hsa-miR-1246	MIMAT0005898	NPFFR2	10886	NM_001144756	1	1	1	3
hsa-miR-1246	MIMAT0005898	NRXN1	9378	NM_004801	1	1	1	3
hsa-miR-1246	MIMAT0005898	NSL1	25936	NM_001042549	1	1	1	3
hsa-miR-1246	MIMAT0005898	NXPE3	91775	NM_001134456	1	1	1	3
hsa-miR-1246	MIMAT0005898	OPRM1	4988	NM_001008504	1	1	1	3
hsa-miR-1246	MIMAT0005898	PAIP2B	400961	NM_020459	1	1	1	3
hsa-miR-1246	MIMAT0005898	PCM1	5108	NM_006197	1	1	1	3
hsa-miR-1246	MIMAT0005898	PCSK6	5046	NM_138322	1	1	1	3
hsa-miR-1246	MIMAT0005898	PEG3	5178	NM_001146185	1	1	1	3
hsa-miR-1246	MIMAT0005898	PGAP1	80055	NM_024989	1	1	1	3
hsa-miR-1246	MIMAT0005898	PHF19	26147	NM_001009936	1	1	1	3
hsa-miR-1246	MIMAT0005898	PHLDA1	22822	NM_007350	1	1	1	3
hsa-miR-1246	MIMAT0005898	PHYHIPL	84457	NM_032439	1	1	1	3
hsa-miR-1246	MIMAT0005898	PI15	51050	NM_015886	1	1	1	3
hsa-miR-1246	MIMAT0005898	PIP4K2A	5305	NM_005028	1	1	1	3
hsa-miR-1246	MIMAT0005898	PLCXD3	345557	NM_001005473	1	1	1	3
hsa-miR-1246	MIMAT0005898	PLEKHB2	55041	NM_001100623	1	1	1	3
hsa-miR-1246	MIMAT0005898	PLEKHG2	64857	NM_022835	1	1	1	3
hsa-miR-1246	MIMAT0005898	PLEKHO2	80301	NM_001195059	1	1	1	3
hsa-miR-1246	MIMAT0005898	PML	5371	NM_033240	1	1	1	3
hsa-miR-1246	MIMAT0005898	PMP2	5375	NM_002677	1	1	1	3
hsa-miR-1246	MIMAT0005898	PPHLN1	51535	NM_001143787	1	1	1	3
hsa-miR-1246	MIMAT0005898	PPM1E	22843	NM_014906	1	1	1	3
hsa-miR-1246	MIMAT0005898	PRELP	5549	NM_002725	1	1	1	3
hsa-miR-1246	MIMAT0005898	PRKAA2	5563	NM_006252	1	1	1	3
hsa-miR-1246	MIMAT0005898	PRKCQ	5588	NM_006257	1	1	1	3
hsa-miR-1246	MIMAT0005898	PROM1	8842	NM_001145847	1	1	1	3
hsa-miR-1246	MIMAT0005898	PRPF18	8559	NM_003675	1	1	1	3
hsa-miR-1246	MIMAT0005898	PSD3	23362	NM_015310	1	1	1	3
hsa-miR-1246	MIMAT0005898	PSIP1	11168	NM_033222	1	1	1	3
hsa-miR-1246	MIMAT0005898	PSMA5	5686	NM_002790	1	1	1	3
hsa-miR-1246	MIMAT0005898	PTAR1	375743	NM_001099666	1	1	1	3
hsa-miR-1246	MIMAT0005898	PTGER3	5733	NM_198715	1	1	1	3
hsa-miR-1246	MIMAT0005898	PTPLAD2	401494	NM_001010915	1	1	1	3
hsa-miR-1246	MIMAT0005898	QKI	9444	NM_206855	1	1	1	3
hsa-miR-1246	MIMAT0005898	QRSL1	55278	NM_018292	1	1	1	3
hsa-miR-1246	MIMAT0005898	QTRTD1	79691	NM_024638	1	1	1	3
hsa-miR-1246	MIMAT0005898	RAB14	51552	NM_016322	1	1	1	3
hsa-miR-1246	MIMAT0005898	RAP2B	5912	NM_002886	1	1	1	3
hsa-miR-1246	MIMAT0005898	RAVER2	55225	NM_018211	1	1	1	3
hsa-miR-1246	MIMAT0005898	REPS2	9185	NM_004726	1	1	1	3
hsa-miR-1246	MIMAT0005898	RNF125	54941	NM_017831	1	1	1	3
hsa-miR-1246	MIMAT0005898	RNF141	50862	NM_016422	1	1	1	3
hsa-miR-1246	MIMAT0005898	RNF182	221687	NM_001165034	1	1	1	3
hsa-miR-1246	MIMAT0005898	ROPN1	54763	NM_017578	1	1	1	3
hsa-miR-1246	MIMAT0005898	RORA	6095	NM_002943	1	1	1	3
hsa-miR-1246	MIMAT0005898	RPL36A	6173	NM_001199972	1	1	1	3
hsa-miR-1246	MIMAT0005898	RPP30	10556	NM_006413	1	1	1	3
hsa-miR-1246	MIMAT0005898	RRAGD	58528	NM_021244	1	1	1	3
hsa-miR-1246	MIMAT0005898	RRN3	54700	NM_018427	1	1	1	3
hsa-miR-1246	MIMAT0005898	RTKN2	219790	NM_145307	1	1	1	3
hsa-miR-1246	MIMAT0005898	SCEL	8796	NM_001160706	1	1	1	3
hsa-miR-1246	MIMAT0005898	SCN1A	6323	NM_001202435	1	1	1	3
hsa-miR-1246	MIMAT0005898	SCN3A	6328	NM_001081677	1	1	1	3
hsa-miR-1246	MIMAT0005898	SEC63	11231	NM_007214	1	1	1	3
hsa-miR-1246	MIMAT0005898	SEMA6A	57556	NM_020796	1	1	1	3
hsa-miR-1246	MIMAT0005898	SEPHS1	22929	NM_001195604	1	1	1	3
hsa-miR-1246	MIMAT0005898	SETDB2	83852	NM_001160308	1	1	1	3
hsa-miR-1246	MIMAT0005898	SGOL1	151648	NM_001199252	1	1	1	3
hsa-miR-1246	MIMAT0005898	SH3TC2	79628	NM_024577	1	1	1	3
hsa-miR-1246	MIMAT0005898	SHISA9	729993	NM_001145204	1	1	1	3
hsa-miR-1246	MIMAT0005898	SIKE1	80143	NM_025073	1	1	1	3
hsa-miR-1246	MIMAT0005898	SKIL	6498	NM_005414	1	1	1	3
hsa-miR-1246	MIMAT0005898	SLAIN1	122060	NM_001242869	1	1	1	3
hsa-miR-1246	MIMAT0005898	SLC16A7	9194	NM_004731	1	1	1	3
hsa-miR-1246	MIMAT0005898	SLC28A3	64078	NM_022127	1	1	1	3
hsa-miR-1246	MIMAT0005898	SLC38A2	54407	NM_018976	1	1	1	3
hsa-miR-1246	MIMAT0005898	SLC43A2	124935	NM_152346	1	1	1	3
hsa-miR-1246	MIMAT0005898	SLITRK4	139065	NM_173078	1	1	1	3
hsa-miR-1246	MIMAT0005898	SMG7	9887	NM_001174061	1	1	1	3
hsa-miR-1246	MIMAT0005898	SOCS4	122809	NM_080867	1	1	1	3
hsa-miR-1246	MIMAT0005898	SORL1	6653	NM_003105	1	1	1	3
hsa-miR-1246	MIMAT0005898	SOX2	6657	NM_003106	1	1	1	3
hsa-miR-1246	MIMAT0005898	SPAM1	6677	NM_003117	1	1	1	3
hsa-miR-1246	MIMAT0005898	SPATS2L	26010	NM_001100424	1	1	1	3
hsa-miR-1246	MIMAT0005898	SPCS2	9789	NM_014752	1	1	1	3
hsa-miR-1246	MIMAT0005898	STXBP5	134957	NM_139244	1	1	1	3
hsa-miR-1246	MIMAT0005898	STYX	6815	NM_001130701	1	1	1	3
hsa-miR-1246	MIMAT0005898	SYT14	255928	NM_001146261	1	1	1	3
hsa-miR-1246	MIMAT0005898	TAF9B	51616	NM_015975	1	1	1	3
hsa-miR-1246	MIMAT0005898	TAOK1	57551	NM_025142	1	1	1	3
hsa-miR-1246	MIMAT0005898	TAP2	6891	NM_000544	1	1	1	3
hsa-miR-1246	MIMAT0005898	TBC1D4	9882	NM_014832	1	1	1	3
hsa-miR-1246	MIMAT0005898	THBS2	7058	NM_003247	1	1	1	3
hsa-miR-1246	MIMAT0005898	THRB	7068	NM_001128177	1	1	1	3
hsa-miR-1246	MIMAT0005898	THSD7A	221981	NM_015204	1	1	1	3
hsa-miR-1246	MIMAT0005898	TM2D3	80213	NM_078474	1	1	1	3
hsa-miR-1246	MIMAT0005898	TMEM123	114908	NM_052932	1	1	1	3
hsa-miR-1246	MIMAT0005898	TMEM130	222865	NM_001134450	1	1	1	3
hsa-miR-1246	MIMAT0005898	TMEM132C	92293	NM_001136103	1	1	1	3
hsa-miR-1246	MIMAT0005898	TMEM184A	202915	NM_001097620	1	1	1	3
hsa-miR-1246	MIMAT0005898	TMEM261	90871	NM_033428	1	1	1	3
hsa-miR-1246	MIMAT0005898	TMEM33	55161	NM_018126	1	1	1	3
hsa-miR-1246	MIMAT0005898	TNFRSF8	943	NM_001243	1	1	1	3
hsa-miR-1246	MIMAT0005898	TPRG1L	127262	NM_182752	1	1	1	3
hsa-miR-1246	MIMAT0005898	TRDMT1	1787	NM_004412	1	1	1	3
hsa-miR-1246	MIMAT0005898	TRIM33	51592	NM_033020	1	1	1	3
hsa-miR-1246	MIMAT0005898	TRPS1	7227	NM_014112	1	1	1	3
hsa-miR-1246	MIMAT0005898	TSPAN31	6302	NM_005981	1	1	1	3
hsa-miR-1246	MIMAT0005898	TSPYL4	23270	NM_021648	1	1	1	3
hsa-miR-1246	MIMAT0005898	TSTD2	158427	NM_139246	1	1	1	3
hsa-miR-1246	MIMAT0005898	TUBGCP3	10426	NM_006322	1	1	1	3
hsa-miR-1246	MIMAT0005898	TUSC3	7991	NM_178234	1	1	1	3
hsa-miR-1246	MIMAT0005898	UBE2A	7319	NM_003336	1	1	1	3
hsa-miR-1246	MIMAT0005898	UBE2G1	7326	NM_003342	1	1	1	3
hsa-miR-1246	MIMAT0005898	UBE2H	7328	NM_003344	1	1	1	3
hsa-miR-1246	MIMAT0005898	UBXN2B	137886	NM_001077619	1	1	1	3
hsa-miR-1246	MIMAT0005898	UFL1	23376	NM_015323	1	1	1	3
hsa-miR-1246	MIMAT0005898	UNC5B	219699	NM_001244889	1	1	1	3
hsa-miR-1246	MIMAT0005898	VCPIP1	80124	NM_025054	1	1	1	3
hsa-miR-1246	MIMAT0005898	VIM	7431	NM_003380	1	1	1	3
hsa-miR-1246	MIMAT0005898	VPS53	55275	NM_001128159	1	1	1	3
hsa-miR-1246	MIMAT0005898	WASF3	10810	NM_006646	1	1	1	3
hsa-miR-1246	MIMAT0005898	WDR77	79084	NM_024102	1	1	1	3
hsa-miR-1246	MIMAT0005898	XK	7504	NM_021083	1	1	1	3
hsa-miR-1246	MIMAT0005898	YAF2	10138	NM_001190979	1	1	1	3
hsa-miR-1246	MIMAT0005898	ZAK	51776	NM_133646	1	1	1	3
hsa-miR-1246	MIMAT0005898	ZCCHC6	79670	NM_024617	1	1	1	3
hsa-miR-1246	MIMAT0005898	ZFP36L1	677	NM_001244698	1	1	1	3
hsa-miR-1246	MIMAT0005898	ZFP42	132625	NM_174900	1	1	1	3
hsa-miR-1246	MIMAT0005898	ZFP69B	65243	NM_023070	1	1	1	3
hsa-miR-1246	MIMAT0005898	ZIC3	7547	NM_003413	1	1	1	3
hsa-miR-1246	MIMAT0005898	ZNF124	7678	NM_003431	1	1	1	3
hsa-miR-1246	MIMAT0005898	ZNF227	7770	NM_182490	1	1	1	3
hsa-miR-1246	MIMAT0005898	ZNF254	9534	NM_203282	1	1	1	3
hsa-miR-1246	MIMAT0005898	ZNF267	10308	NM_003414	1	1	1	3
hsa-miR-1246	MIMAT0005898	ZNF304	57343	NM_020657	1	1	1	3
hsa-miR-1246	MIMAT0005898	ZNF470	388566	NM_001001668	1	1	1	3
hsa-miR-1246	MIMAT0005898	ZNF502	91392	NM_001134440	1	1	1	3
hsa-miR-1246	MIMAT0005898	ZNF518B	85460	NM_053042	1	1	1	3
hsa-miR-1246	MIMAT0005898	ZNF697	90874	NM_001080470	1	1	1	3
hsa-miR-1246	MIMAT0005898	ZNF714	148206	NM_182515	1	1	1	3
hsa-miR-1307-5p	MIMAT0022727	RPS6KA2	6196	NM_021135	1	1	1	3
hsa-miR-142-3p	MIMAT0000434	AFF1	4299	NM_001166693	1	1	1	3
hsa-miR-142-3p	MIMAT0000434	ALCAM	214	NM_001243281	1	1	1	3
hsa-miR-142-3p	MIMAT0000434	ANKRD11	29123	NM_013275	1	1	1	3
hsa-miR-142-3p	MIMAT0000434	ANKRD46	157567	NM_198401	1	1	1	3
hsa-miR-142-3p	MIMAT0000434	APC	324	NM_000038	1	1	1	3
hsa-miR-142-3p	MIMAT0000434	ARL15	54622	NM_019087	1	1	1	3
hsa-miR-142-3p	MIMAT0000434	ARNTL	406	NM_001178	1	1	1	3
hsa-miR-142-3p	MIMAT0000434	ASH1L	55870	NM_018489	1	1	1	3
hsa-miR-142-3p	MIMAT0000434	ATF7IP	55729	NM_018179	1	1	1	3
hsa-miR-142-3p	MIMAT0000434	ATP2A2	488	NM_001681	1	1	1	3
hsa-miR-142-3p	MIMAT0000434	ATP6V1G3	127124	NM_133326	1	1	1	3
hsa-miR-142-3p	MIMAT0000434	BAZ1A	11177	NM_013448	1	1	1	3
hsa-miR-142-3p	MIMAT0000434	BHLHB9	80823	NM_030639	1	1	1	3
hsa-miR-142-3p	MIMAT0000434	BOD1	91272	NM_001159651	1	1	1	3
hsa-miR-142-3p	MIMAT0000434	C18orf25	147339	NM_145055	1	1	1	3
hsa-miR-142-3p	MIMAT0000434	C20orf194	25943	NM_001009984	1	1	1	3
hsa-miR-142-3p	MIMAT0000434	C5orf24	134553	NM_001135586	1	1	1	3
hsa-miR-142-3p	MIMAT0000434	C9orf72	203228	NM_018325	1	1	1	3
hsa-miR-142-3p	MIMAT0000434	CALCOCO2	10241	NM_005831	1	1	1	3
hsa-miR-142-3p	MIMAT0000434	CASK	8573	NM_001126054	1	1	1	3
hsa-miR-142-3p	MIMAT0000434	CCDC141	285025	NM_173648	1	1	1	3
hsa-miR-142-3p	MIMAT0000434	CCNT2	905	NM_058241	1	1	1	3
hsa-miR-142-3p	MIMAT0000434	CD1D	912	NM_001766	1	1	1	3
hsa-miR-142-3p	MIMAT0000434	CDKL2	8999	NM_003948	1	1	1	3
hsa-miR-142-3p	MIMAT0000434	CELF3	11189	NM_001172648	1	1	1	3
hsa-miR-142-3p	MIMAT0000434	CEP192	55125	NM_032142	1	1	1	3
hsa-miR-142-3p	MIMAT0000434	CFL2	1073	NM_021914	1	1	1	3
hsa-miR-142-3p	MIMAT0000434	CLDN12	9069	NM_001185073	1	1	1	3
hsa-miR-142-3p	MIMAT0000434	CLTA	1211	NM_001184761	1	1	1	3
hsa-miR-142-3p	MIMAT0000434	CNNM1	26507	NM_020348	1	1	1	3
hsa-miR-142-3p	MIMAT0000434	CNTNAP3B	728577	NM_001201380	1	1	1	3
hsa-miR-142-3p	MIMAT0000434	CREB5	9586	NM_182898	1	1	1	3
hsa-miR-142-3p	MIMAT0000434	CRIPT	9419	NM_014171	1	1	1	3
hsa-miR-142-3p	MIMAT0000434	CXADR	1525	NM_001338	1	1	1	3
hsa-miR-142-3p	MIMAT0000434	DCUN1D4	23142	NM_001040402	1	1	1	3
hsa-miR-142-3p	MIMAT0000434	DIRC2	84925	NM_032839	1	1	1	3
hsa-miR-142-3p	MIMAT0000434	ECM2	1842	NM_001393	1	1	1	3
hsa-miR-142-3p	MIMAT0000434	EHF	26298	NM_001206616	1	1	1	3
hsa-miR-142-3p	MIMAT0000434	EML4	27436	NM_019063	1	1	1	3
hsa-miR-142-3p	MIMAT0000434	EP400	57634	NM_015409	1	1	1	3
hsa-miR-142-3p	MIMAT0000434	ERC1	23085	NM_178040	1	1	1	3
hsa-miR-142-3p	MIMAT0000434	FAM102B	284611	NM_001010883	1	1	1	3
hsa-miR-142-3p	MIMAT0000434	FAM114A1	92689	NM_138389	1	1	1	3
hsa-miR-142-3p	MIMAT0000434	FAM177A1	283635	NM_173607	1	1	1	3
hsa-miR-142-3p	MIMAT0000434	FAM208B	54906	NM_017782	1	1	1	3
hsa-miR-142-3p	MIMAT0000434	FBXO3	26273	NM_012175	1	1	1	3
hsa-miR-142-3p	MIMAT0000434	FGF23	8074	NM_020638	1	1	1	3
hsa-miR-142-3p	MIMAT0000434	FGF9	2254	NM_002010	1	1	1	3
hsa-miR-142-3p	MIMAT0000434	FOXF2	2295	NM_001452	1	1	1	3
hsa-miR-142-3p	MIMAT0000434	FOXO4	4303	NM_005938	1	1	1	3
hsa-miR-142-3p	MIMAT0000434	GAB1	2549	NM_207123	1	1	1	3
hsa-miR-142-3p	MIMAT0000434	GPR137C	283554	NM_001099652	1	1	1	3
hsa-miR-142-3p	MIMAT0000434	HAUS3	79441	NM_024511	1	1	1	3
hsa-miR-142-3p	MIMAT0000434	HEATR5A	25938	NM_015473	1	1	1	3
hsa-miR-142-3p	MIMAT0000434	HECTD1	25831	NM_015382	1	1	1	3
hsa-miR-142-3p	MIMAT0000434	HGS	9146	NM_004712	1	1	1	3
hsa-miR-142-3p	MIMAT0000434	HNRNPDL	9987	NM_001207000	1	1	1	3
hsa-miR-142-3p	MIMAT0000434	HSPA1B	3304	NM_005346	1	1	1	3
hsa-miR-142-3p	MIMAT0000434	INPP5A	3632	NM_005539	1	1	1	3
hsa-miR-142-3p	MIMAT0000434	ITGAV	3685	NM_002210	1	1	1	3
hsa-miR-142-3p	MIMAT0000434	ITGB8	3696	NM_002214	1	1	1	3
hsa-miR-142-3p	MIMAT0000434	KAT2B	8850	NM_003884	1	1	1	3
hsa-miR-142-3p	MIMAT0000434	KBTBD12	166348	NM_207335	1	1	1	3
hsa-miR-142-3p	MIMAT0000434	KDELR2	11014	NM_006854	1	1	1	3
hsa-miR-142-3p	MIMAT0000434	KIF5B	3799	NM_004521	1	1	1	3
hsa-miR-142-3p	MIMAT0000434	KLHDC1	122773	NM_172193	1	1	1	3
hsa-miR-142-3p	MIMAT0000434	LCOR	84458	NM_032440	1	1	1	3
hsa-miR-142-3p	MIMAT0000434	LOC729020	729020	NM_001143909	1	1	1	3
hsa-miR-142-3p	MIMAT0000434	LRRC3B	116135	NM_052953	1	1	1	3
hsa-miR-142-3p	MIMAT0000434	MAP4K3	8491	NM_003618	1	1	1	3
hsa-miR-142-3p	MIMAT0000434	ME1	4199	NM_002395	1	1	1	3
hsa-miR-142-3p	MIMAT0000434	MGAT4A	11320	NM_012214	1	1	1	3
hsa-miR-142-3p	MIMAT0000434	MOB1B	92597	NM_001244766	1	1	1	3
hsa-miR-142-3p	MIMAT0000434	MOB4	25843	NM_015387	1	1	1	3
hsa-miR-142-3p	MIMAT0000434	MON2	23041	NM_015026	1	1	1	3
hsa-miR-142-3p	MIMAT0000434	MORF4L2	9643	NM_001142422	1	1	1	3
hsa-miR-142-3p	MIMAT0000434	MTMR9	66036	NM_015458	1	1	1	3
hsa-miR-142-3p	MIMAT0000434	MYH10	4628	NM_005964	1	1	1	3
hsa-miR-142-3p	MIMAT0000434	MYLK	4638	NM_053027	1	1	1	3
hsa-miR-142-3p	MIMAT0000434	MZT1	440145	NM_001071775	1	1	1	3
hsa-miR-142-3p	MIMAT0000434	NBPF3	84224	NM_032264	1	1	1	3
hsa-miR-142-3p	MIMAT0000434	NHLRC2	374354	NM_198514	1	1	1	3
hsa-miR-142-3p	MIMAT0000434	NR2C1	7181	NM_003297	1	1	1	3
hsa-miR-142-3p	MIMAT0000434	OSBPL3	26031	NM_145320	1	1	1	3
hsa-miR-142-3p	MIMAT0000434	PARPBP	55010	NM_017915	1	1	1	3
hsa-miR-142-3p	MIMAT0000434	PATZ1	23598	NM_032050	1	1	1	3
hsa-miR-142-3p	MIMAT0000434	PCGF3	10336	NM_006315	1	1	1	3
hsa-miR-142-3p	MIMAT0000434	PCMTD2	55251	NM_018257	1	1	1	3
hsa-miR-142-3p	MIMAT0000434	PCSK1	5122	NM_001177876	1	1	1	3
hsa-miR-142-3p	MIMAT0000434	PDE4B	5142	NM_001037340	1	1	1	3
hsa-miR-142-3p	MIMAT0000434	PDSS2	57107	NM_020381	1	1	1	3
hsa-miR-142-3p	MIMAT0000434	PDZD9	255762	NM_173806	1	1	1	3
hsa-miR-142-3p	MIMAT0000434	PELO	53918	NM_015946	1	1	1	3
hsa-miR-142-3p	MIMAT0000434	PGM1	5236	NM_002633	1	1	1	3
hsa-miR-142-3p	MIMAT0000434	PLA2G12A	81579	NM_030821	1	1	1	3
hsa-miR-142-3p	MIMAT0000434	PLRG1	5356	NM_001201564	1	1	1	3
hsa-miR-142-3p	MIMAT0000434	PNO1	56902	NM_020143	1	1	1	3
hsa-miR-142-3p	MIMAT0000434	PPP1R10	5514	NM_002714	1	1	1	3
hsa-miR-142-3p	MIMAT0000434	PPP1R2	5504	NM_006241	1	1	1	3
hsa-miR-142-3p	MIMAT0000434	PRLR	5618	NM_001204314	1	1	1	3
hsa-miR-142-3p	MIMAT0000434	PSME4	23198	NM_014614	1	1	1	3
hsa-miR-142-3p	MIMAT0000434	PUM1	9698	NM_001020658	1	1	1	3
hsa-miR-142-3p	MIMAT0000434	QKI	9444	NM_006775	1	1	1	3
hsa-miR-142-3p	MIMAT0000434	RAB11FIP2	22841	NM_014904	1	1	1	3
hsa-miR-142-3p	MIMAT0000434	RAB2A	5862	NM_002865	1	1	1	3
hsa-miR-142-3p	MIMAT0000434	RGL2	5863	NM_004761	1	1	1	3
hsa-miR-142-3p	MIMAT0000434	RHOBTB3	22836	NM_014899	1	1	1	3
hsa-miR-142-3p	MIMAT0000434	RICTOR	253260	NM_152756	1	1	1	3
hsa-miR-142-3p	MIMAT0000434	RLF	6018	NM_012421	1	1	1	3
hsa-miR-142-3p	MIMAT0000434	RPE	6120	NM_199229	1	1	1	3
hsa-miR-142-3p	MIMAT0000434	SAMD12	401474	NM_001101676	1	1	1	3
hsa-miR-142-3p	MIMAT0000434	SEMA3D	223117	NM_152754	1	1	1	3
hsa-miR-142-3p	MIMAT0000434	SLC1A3	6507	NM_004172	1	1	1	3
hsa-miR-142-3p	MIMAT0000434	SLC30A9	10463	NM_006345	1	1	1	3
hsa-miR-142-3p	MIMAT0000434	SLC35F5	80255	NM_025181	1	1	1	3
hsa-miR-142-3p	MIMAT0000434	SLC37A3	84255	NM_207113	1	1	1	3
hsa-miR-142-3p	MIMAT0000434	SLC38A4	55089	NM_001143824	1	1	1	3
hsa-miR-142-3p	MIMAT0000434	SMARCA5	8467	NM_003601	1	1	1	3
hsa-miR-142-3p	MIMAT0000434	SMG1	23049	NM_015092	1	1	1	3
hsa-miR-142-3p	MIMAT0000434	SOGA2	23255	NM_015210	1	1	1	3
hsa-miR-142-3p	MIMAT0000434	SP8	221833	NM_182700	1	1	1	3
hsa-miR-142-3p	MIMAT0000434	STX12	23673	NM_177424	1	1	1	3
hsa-miR-142-3p	MIMAT0000434	SUCO	51430	NM_014283	1	1	1	3
hsa-miR-142-3p	MIMAT0000434	SYN2	6854	NM_133625	1	1	1	3
hsa-miR-142-3p	MIMAT0000434	SYNJ2BP	55333	NM_018373	1	1	1	3
hsa-miR-142-3p	MIMAT0000434	SYPL1	6856	NM_182715	1	1	1	3
hsa-miR-142-3p	MIMAT0000434	TAB2	23118	NM_015093	1	1	1	3
hsa-miR-142-3p	MIMAT0000434	TAOK1	57551	NM_020791	1	1	1	3
hsa-miR-142-3p	MIMAT0000434	TARDBP	23435	NM_007375	1	1	1	3
hsa-miR-142-3p	MIMAT0000434	TBRG1	84897	NM_032811	1	1	1	3
hsa-miR-142-3p	MIMAT0000434	TGFBR1	7046	NM_001130916	1	1	1	3
hsa-miR-142-3p	MIMAT0000434	TMEM200B	399474	NM_001003682	1	1	1	3
hsa-miR-142-3p	MIMAT0000434	TMEM59	9528	NM_004872	1	1	1	3
hsa-miR-142-3p	MIMAT0000434	TMTC3	160418	NM_181783	1	1	1	3
hsa-miR-142-3p	MIMAT0000434	TSEN34	79042	NM_024075	1	1	1	3
hsa-miR-142-3p	MIMAT0000434	TSPAN6	7105	NM_003270	1	1	1	3
hsa-miR-142-3p	MIMAT0000434	TWF1	5756	NM_001242397	1	1	1	3
hsa-miR-142-3p	MIMAT0000434	UGT2B7	7364	NM_001074	1	1	1	3
hsa-miR-142-3p	MIMAT0000434	USP33	23032	NM_201624	1	1	1	3
hsa-miR-142-3p	MIMAT0000434	USP6NL	9712	NM_014688	1	1	1	3
hsa-miR-142-3p	MIMAT0000434	USP9X	8239	NM_001039591	1	1	1	3
hsa-miR-142-3p	MIMAT0000434	UTRN	7402	NM_007124	1	1	1	3
hsa-miR-142-3p	MIMAT0000434	VAMP3	9341	NM_004781	1	1	1	3
hsa-miR-142-3p	MIMAT0000434	WASL	8976	NM_003941	1	1	1	3
hsa-miR-142-3p	MIMAT0000434	WDR5B	54554	NM_019069	1	1	1	3
hsa-miR-142-3p	MIMAT0000434	WHAMM	123720	NM_001080435	1	1	1	3
hsa-miR-142-3p	MIMAT0000434	XPO1	7514	NM_003400	1	1	1	3
hsa-miR-142-3p	MIMAT0000434	ZBTB41	360023	NM_194314	1	1	1	3
hsa-miR-142-3p	MIMAT0000434	ZCCHC14	23174	NM_015144	1	1	1	3
hsa-miR-142-3p	MIMAT0000434	ZEB2	9839	NM_014795	1	1	1	3
hsa-miR-142-3p	MIMAT0000434	ZNF217	7764	NM_006526	1	1	1	3
hsa-miR-142-3p	MIMAT0000434	ZNF430	80264	NM_001172671	1	1	1	3
hsa-miR-142-3p	MIMAT0000434	ZNF460	10794	NM_006635	1	1	1	3
hsa-miR-142-3p	MIMAT0000434	ZNF479	90827	NM_033273	1	1	1	3
hsa-miR-142-3p	MIMAT0000434	ZNF676	163223	NM_001001411	1	1	1	3
hsa-miR-142-3p	MIMAT0000434	ZNF682	91120	NM_001077349	1	1	1	3
hsa-miR-142-3p	MIMAT0000434	ZNF845	91664	NM_138374	1	1	1	3
hsa-miR-142-3p	MIMAT0000434	ZNF90	7643	NM_007138	1	1	1	3
hsa-miR-1470	MIMAT0007348	AFF2	2334	NM_002025	1	1	1	3
hsa-miR-1470	MIMAT0007348	ANKRD52	283373	NM_173595	1	1	1	3
hsa-miR-1470	MIMAT0007348	CDH18	1016	NM_001167667	1	1	1	3
hsa-miR-1470	MIMAT0007348	PIAS2	9063	NM_173206	1	1	1	3
hsa-miR-1470	MIMAT0007348	PRKCD	5580	NM_006254	1	1	1	3
hsa-miR-1470	MIMAT0007348	S100B	6285	NM_006272	1	1	1	3
hsa-miR-1470	MIMAT0007348	SNX8	29886	NM_013321	1	1	1	3
hsa-miR-1470	MIMAT0007348	SRGAP3	9901	NM_014850	1	1	1	3
hsa-miR-1470	MIMAT0007348	SRP19	6728	NM_003135	1	1	1	3
hsa-miR-1470	MIMAT0007348	TFAP2B	7021	NM_003221	1	1	1	3
hsa-miR-182-5p	MIMAT0000259	A1CF	29974	NM_001198818	1	1	1	3
hsa-miR-182-5p	MIMAT0000259	AADAC	13	NM_001086	1	1	1	3
hsa-miR-182-5p	MIMAT0000259	AAGAB	79719	NM_024666	1	1	1	3
hsa-miR-182-5p	MIMAT0000259	AAK1	22848	NM_014911	1	1	1	3
hsa-miR-182-5p	MIMAT0000259	AASS	10157	NM_005763	1	1	1	3
hsa-miR-182-5p	MIMAT0000259	AATK	9625	NM_001080395	1	1	1	3
hsa-miR-182-5p	MIMAT0000259	ABHD13	84945	NM_032859	1	1	1	3
hsa-miR-182-5p	MIMAT0000259	ABHD17B	51104	NM_001025780	1	1	1	3
hsa-miR-182-5p	MIMAT0000259	ACER3	55331	NM_018367	1	1	1	3
hsa-miR-182-5p	MIMAT0000259	ACTR2	10097	NM_001005386	1	1	1	3
hsa-miR-182-5p	MIMAT0000259	ACVR1	90	NM_001111067	1	1	1	3
hsa-miR-182-5p	MIMAT0000259	ADAM18	8749	NM_001190956	1	1	1	3
hsa-miR-182-5p	MIMAT0000259	ADAM9	8754	NM_003816	1	1	1	3
hsa-miR-182-5p	MIMAT0000259	ADD3	120	NM_016824	1	1	1	3
hsa-miR-182-5p	MIMAT0000259	ADH6	130	NM_001102470	1	1	1	3
hsa-miR-182-5p	MIMAT0000259	ADRA2C	152	NM_000683	1	1	1	3
hsa-miR-182-5p	MIMAT0000259	ADSS	159	NM_001126	1	1	1	3
hsa-miR-182-5p	MIMAT0000259	AEBP2	121536	NM_153207	1	1	1	3
hsa-miR-182-5p	MIMAT0000259	AGO1	26523	NM_012199	1	1	1	3
hsa-miR-182-5p	MIMAT0000259	AJUBA	84962	NM_198086	1	1	1	3
hsa-miR-182-5p	MIMAT0000259	ALG11	440138	NM_001004127	1	1	1	3
hsa-miR-182-5p	MIMAT0000259	AMER1	139285	NM_152424	1	1	1	3
hsa-miR-182-5p	MIMAT0000259	ANK3	288	NM_020987	1	1	1	3
hsa-miR-182-5p	MIMAT0000259	ANKRD44	91526	NM_001195144	1	1	1	3
hsa-miR-182-5p	MIMAT0000259	ANO5	203859	NM_213599	1	1	1	3
hsa-miR-182-5p	MIMAT0000259	APBA2	321	NM_005503	1	1	1	3
hsa-miR-182-5p	MIMAT0000259	APOL6	80830	NM_030641	1	1	1	3
hsa-miR-182-5p	MIMAT0000259	AQP2	359	NM_000486	1	1	1	3
hsa-miR-182-5p	MIMAT0000259	ARCN1	372	NM_001655	1	1	1	3
hsa-miR-182-5p	MIMAT0000259	ARF4	378	NM_001660	1	1	1	3
hsa-miR-182-5p	MIMAT0000259	ARHGAP6	395	NM_013427	1	1	1	3
hsa-miR-182-5p	MIMAT0000259	ARHGDIA	396	NM_004309	1	1	1	3
hsa-miR-182-5p	MIMAT0000259	ARHGEF3	50650	NM_001128615	1	1	1	3
hsa-miR-182-5p	MIMAT0000259	ARHGEF7	8874	NM_145735	1	1	1	3
hsa-miR-182-5p	MIMAT0000259	ART3	419	NM_001130016	1	1	1	3
hsa-miR-182-5p	MIMAT0000259	AS3MT	57412	NM_020682	1	1	1	3
hsa-miR-182-5p	MIMAT0000259	ASPN	54829	NM_001193335	1	1	1	3
hsa-miR-182-5p	MIMAT0000259	ATF6	22926	NM_007348	1	1	1	3
hsa-miR-182-5p	MIMAT0000259	ATP11C	286410	NM_001010986	1	1	1	3
hsa-miR-182-5p	MIMAT0000259	ATP1B3	483	NM_001679	1	1	1	3
hsa-miR-182-5p	MIMAT0000259	ATP5L	10632	NM_006476	1	1	1	3
hsa-miR-182-5p	MIMAT0000259	B3GALT1	8708	NM_020981	1	1	1	3
hsa-miR-182-5p	MIMAT0000259	BCL10	8915	NM_003921	1	1	1	3
hsa-miR-182-5p	MIMAT0000259	BCL11A	53335	NM_022893	1	1	1	3
hsa-miR-182-5p	MIMAT0000259	BCL2L12	83596	NM_138639	1	1	1	3
hsa-miR-182-5p	MIMAT0000259	BCLAF1	9774	NM_014739	1	1	1	3
hsa-miR-182-5p	MIMAT0000259	BDNF	627	NM_001709	1	1	1	3
hsa-miR-182-5p	MIMAT0000259	BMP3	651	NM_001201	1	1	1	3
hsa-miR-182-5p	MIMAT0000259	BMPR1B	658	NM_001203	1	1	1	3
hsa-miR-182-5p	MIMAT0000259	BNC2	54796	NM_017637	1	1	1	3
hsa-miR-182-5p	MIMAT0000259	BRMS1L	84312	NM_032352	1	1	1	3
hsa-miR-182-5p	MIMAT0000259	BTLA	151888	NM_181780	1	1	1	3
hsa-miR-182-5p	MIMAT0000259	C10orf105	414152	NM_001168390	1	1	1	3
hsa-miR-182-5p	MIMAT0000259	C12orf4	57102	NM_020374	1	1	1	3
hsa-miR-182-5p	MIMAT0000259	C12orf5	57103	NM_020375	1	1	1	3
hsa-miR-182-5p	MIMAT0000259	C1orf95	375057	NM_001003665	1	1	1	3
hsa-miR-182-5p	MIMAT0000259	C21orf91	54149	NM_001100421	1	1	1	3
hsa-miR-182-5p	MIMAT0000259	C2orf72	257407	NM_001144994	1	1	1	3
hsa-miR-182-5p	MIMAT0000259	C3orf33	285315	NM_173657	1	1	1	3
hsa-miR-182-5p	MIMAT0000259	C3orf38	285237	NM_173824	1	1	1	3
hsa-miR-182-5p	MIMAT0000259	C5orf22	55322	NM_018356	1	1	1	3
hsa-miR-182-5p	MIMAT0000259	C5orf55	116349	NM_138464	1	1	1	3
hsa-miR-182-5p	MIMAT0000259	C7orf60	154743	NM_152556	1	1	1	3
hsa-miR-182-5p	MIMAT0000259	CACNB4	785	NM_001005747	1	1	1	3
hsa-miR-182-5p	MIMAT0000259	CADPS2	93664	NM_001167940	1	1	1	3
hsa-miR-182-5p	MIMAT0000259	CALB1	793	NM_004929	1	1	1	3
hsa-miR-182-5p	MIMAT0000259	CAMSAP2	23271	NM_203459	1	1	1	3
hsa-miR-182-5p	MIMAT0000259	CAPN5	726	NM_004055	1	1	1	3
hsa-miR-182-5p	MIMAT0000259	CBFA2T3	863	NM_005187	1	1	1	3
hsa-miR-182-5p	MIMAT0000259	CCDC132	55610	NM_024553	1	1	1	3
hsa-miR-182-5p	MIMAT0000259	CCDC41	51134	NM_001042399	1	1	1	3
hsa-miR-182-5p	MIMAT0000259	CCDC59	29080	NM_014167	1	1	1	3
hsa-miR-182-5p	MIMAT0000259	CCNY	219771	NM_181698	1	1	1	3
hsa-miR-182-5p	MIMAT0000259	CCR9	10803	NM_031200	1	1	1	3
hsa-miR-182-5p	MIMAT0000259	CD2AP	23607	NM_012120	1	1	1	3
hsa-miR-182-5p	MIMAT0000259	CD47	961	NM_001777	1	1	1	3
hsa-miR-182-5p	MIMAT0000259	CD59	966	NM_203331	1	1	1	3
hsa-miR-182-5p	MIMAT0000259	CDK1	983	NM_001170406	1	1	1	3
hsa-miR-182-5p	MIMAT0000259	CEBPA	1050	NM_004364	1	1	1	3
hsa-miR-182-5p	MIMAT0000259	CELF1	10658	NM_001172640	1	1	1	3
hsa-miR-182-5p	MIMAT0000259	CELF6	60677	NM_052840	1	1	1	3
hsa-miR-182-5p	MIMAT0000259	CENPQ	55166	NM_018132	1	1	1	3
hsa-miR-182-5p	MIMAT0000259	CEP135	9662	NM_025009	1	1	1	3
hsa-miR-182-5p	MIMAT0000259	CHAMP1	283489	NM_001164144	1	1	1	3
hsa-miR-182-5p	MIMAT0000259	CHIC1	53344	NM_001039840	1	1	1	3
hsa-miR-182-5p	MIMAT0000259	CHMP1A	5119	NM_001083314	1	1	1	3
hsa-miR-182-5p	MIMAT0000259	CHMP2B	25978	NM_014043	1	1	1	3
hsa-miR-182-5p	MIMAT0000259	CHRNA4	1137	NM_000744	1	1	1	3
hsa-miR-182-5p	MIMAT0000259	CLCN5	1184	NM_001127899	1	1	1	3
hsa-miR-182-5p	MIMAT0000259	CLDN16	10686	NM_006580	1	1	1	3
hsa-miR-182-5p	MIMAT0000259	CLOCK	9575	NM_004898	1	1	1	3
hsa-miR-182-5p	MIMAT0000259	CLPTM1L	81037	NM_030782	1	1	1	3
hsa-miR-182-5p	MIMAT0000259	COL4A4	1286	NM_000092	1	1	1	3
hsa-miR-182-5p	MIMAT0000259	CORO1C	23603	NM_014325	1	1	1	3
hsa-miR-182-5p	MIMAT0000259	CPPED1	55313	NM_018340	1	1	1	3
hsa-miR-182-5p	MIMAT0000259	CPXM2	119587	NM_198148	1	1	1	3
hsa-miR-182-5p	MIMAT0000259	CREB1	1385	NM_134442	1	1	1	3
hsa-miR-182-5p	MIMAT0000259	CREB3L1	90993	NM_052854	1	1	1	3
hsa-miR-182-5p	MIMAT0000259	CRISP3	10321	NM_006061	1	1	1	3
hsa-miR-182-5p	MIMAT0000259	CTBP2	1488	NM_001083914	1	1	1	3
hsa-miR-182-5p	MIMAT0000259	CTTN	2017	NM_005231	1	1	1	3
hsa-miR-182-5p	MIMAT0000259	CUL5	8065	NM_003478	1	1	1	3
hsa-miR-182-5p	MIMAT0000259	DACT1	51339	NM_001079520	1	1	1	3
hsa-miR-182-5p	MIMAT0000259	DAP	1611	NM_004394	1	1	1	3
hsa-miR-182-5p	MIMAT0000259	DAZAP2	9802	NM_001136264	1	1	1	3
hsa-miR-182-5p	MIMAT0000259	DCP2	167227	NM_001242377	1	1	1	3
hsa-miR-182-5p	MIMAT0000259	DCUN1D4	23142	NM_001040402	1	1	1	3
hsa-miR-182-5p	MIMAT0000259	DENND1B	163486	NM_001195216	1	1	1	3
hsa-miR-182-5p	MIMAT0000259	DENND5B	160518	NM_144973	1	1	1	3
hsa-miR-182-5p	MIMAT0000259	DENR	8562	NM_003677	1	1	1	3
hsa-miR-182-5p	MIMAT0000259	DICER1	23405	NM_001195573	1	1	1	3
hsa-miR-182-5p	MIMAT0000259	DMXL1	1657	NM_005509	1	1	1	3
hsa-miR-182-5p	MIMAT0000259	DNAJB9	4189	NM_012328	1	1	1	3
hsa-miR-182-5p	MIMAT0000259	DNAJC15	29103	NM_013238	1	1	1	3
hsa-miR-182-5p	MIMAT0000259	DOCK9	23348	NM_015296	1	1	1	3
hsa-miR-182-5p	MIMAT0000259	DPH3	285381	NM_001047434	1	1	1	3
hsa-miR-182-5p	MIMAT0000259	DQX1	165545	NM_133637	1	1	1	3
hsa-miR-182-5p	MIMAT0000259	DSCAM	1826	NM_001389	1	1	1	3
hsa-miR-182-5p	MIMAT0000259	DSG2	1829	NM_001943	1	1	1	3
hsa-miR-182-5p	MIMAT0000259	DYNLT3	6990	NM_006520	1	1	1	3
hsa-miR-182-5p	MIMAT0000259	EBF3	253738	NM_001005463	1	1	1	3
hsa-miR-182-5p	MIMAT0000259	EDNRB	1910	NM_001122659	1	1	1	3
hsa-miR-182-5p	MIMAT0000259	EGR3	1960	NM_004430	1	1	1	3
hsa-miR-182-5p	MIMAT0000259	EIF5	1983	NM_001969	1	1	1	3
hsa-miR-182-5p	MIMAT0000259	ELL	8178	NM_006532	1	1	1	3
hsa-miR-182-5p	MIMAT0000259	ELL2	22936	NM_012081	1	1	1	3
hsa-miR-182-5p	MIMAT0000259	ELMOD2	255520	NM_153702	1	1	1	3
hsa-miR-182-5p	MIMAT0000259	EMB	133418	NM_198449	1	1	1	3
hsa-miR-182-5p	MIMAT0000259	EOMES	8320	NM_005442	1	1	1	3
hsa-miR-182-5p	MIMAT0000259	EPAS1	2034	NM_001430	1	1	1	3
hsa-miR-182-5p	MIMAT0000259	EPDR1	54749	NM_001242946	1	1	1	3
hsa-miR-182-5p	MIMAT0000259	EPT1	85465	NM_033505	1	1	1	3
hsa-miR-182-5p	MIMAT0000259	ERI2	112479	NM_001142725	1	1	1	3
hsa-miR-182-5p	MIMAT0000259	ETS2	2114	NM_005239	1	1	1	3
hsa-miR-182-5p	MIMAT0000259	EVI5	7813	NM_005665	1	1	1	3
hsa-miR-182-5p	MIMAT0000259	EXOC4	60412	NM_021807	1	1	1	3
hsa-miR-182-5p	MIMAT0000259	FAM111A	63901	NM_001142520	1	1	1	3
hsa-miR-182-5p	MIMAT0000259	FAM134B	54463	NM_019000	1	1	1	3
hsa-miR-182-5p	MIMAT0000259	FAM155B	27112	NM_015686	1	1	1	3
hsa-miR-182-5p	MIMAT0000259	FAM171A1	221061	NM_001010924	1	1	1	3
hsa-miR-182-5p	MIMAT0000259	FAM188A	80013	NM_024948	1	1	1	3
hsa-miR-182-5p	MIMAT0000259	FAM20B	9917	NM_014864	1	1	1	3
hsa-miR-182-5p	MIMAT0000259	FAM211A	388341	NM_207387	1	1	1	3
hsa-miR-182-5p	MIMAT0000259	FAM43A	131583	NM_153690	1	1	1	3
hsa-miR-182-5p	MIMAT0000259	FAM45A	404636	NM_207009	1	1	1	3
hsa-miR-182-5p	MIMAT0000259	FAM78A	286336	NM_033387	1	1	1	3
hsa-miR-182-5p	MIMAT0000259	FBXW11	23291	NM_012300	1	1	1	3
hsa-miR-182-5p	MIMAT0000259	FBXW2	26190	NM_012164	1	1	1	3
hsa-miR-182-5p	MIMAT0000259	FBXW7	55294	NM_018315	1	1	1	3
hsa-miR-182-5p	MIMAT0000259	FGD4	121512	NM_139241	1	1	1	3
hsa-miR-182-5p	MIMAT0000259	FGF9	2254	NM_002010	1	1	1	3
hsa-miR-182-5p	MIMAT0000259	FLOT1	10211	NM_005803	1	1	1	3
hsa-miR-182-5p	MIMAT0000259	FLRT2	23768	NM_013231	1	1	1	3
hsa-miR-182-5p	MIMAT0000259	FMR1	2332	NM_001185076	1	1	1	3
hsa-miR-182-5p	MIMAT0000259	FOXF2	2295	NM_001452	1	1	1	3
hsa-miR-182-5p	MIMAT0000259	FOXN3	1112	NM_005197	1	1	1	3
hsa-miR-182-5p	MIMAT0000259	FOXO3	2309	NM_001455	1	1	1	3
hsa-miR-182-5p	MIMAT0000259	FRS2	10818	NM_006654	1	1	1	3
hsa-miR-182-5p	MIMAT0000259	FXR1	8087	NM_001013439	1	1	1	3
hsa-miR-182-5p	MIMAT0000259	GDF6	392255	NM_001001557	1	1	1	3
hsa-miR-182-5p	MIMAT0000259	GGACT	87769	NM_001195087	1	1	1	3
hsa-miR-182-5p	MIMAT0000259	GGCX	2677	NM_001142269	1	1	1	3
hsa-miR-182-5p	MIMAT0000259	GIMAP8	155038	NM_175571	1	1	1	3
hsa-miR-182-5p	MIMAT0000259	GIT2	9815	NM_001135214	1	1	1	3
hsa-miR-182-5p	MIMAT0000259	GK	2710	NM_001205019	1	1	1	3
hsa-miR-182-5p	MIMAT0000259	GLI2	2736	NM_005270	1	1	1	3
hsa-miR-182-5p	MIMAT0000259	GLRA3	8001	NM_006529	1	1	1	3
hsa-miR-182-5p	MIMAT0000259	GNPNAT1	64841	NM_198066	1	1	1	3
hsa-miR-182-5p	MIMAT0000259	GOLGA6C	653641	NM_001164404	1	1	1	3
hsa-miR-182-5p	MIMAT0000259	GOLGA8A	23015	NM_181077	1	1	1	3
hsa-miR-182-5p	MIMAT0000259	GOLGA8B	440270	NM_001023567	1	1	1	3
hsa-miR-182-5p	MIMAT0000259	GPC1	2817	NM_002081	1	1	1	3
hsa-miR-182-5p	MIMAT0000259	GPR116	221395	NM_001098518	1	1	1	3
hsa-miR-182-5p	MIMAT0000259	GPR158	57512	NM_020752	1	1	1	3
hsa-miR-182-5p	MIMAT0000259	GPR180	160897	NM_180989	1	1	1	3
hsa-miR-182-5p	MIMAT0000259	GRIA3	2892	NM_007325	1	1	1	3
hsa-miR-182-5p	MIMAT0000259	GXYLT1	283464	NM_001099650	1	1	1	3
hsa-miR-182-5p	MIMAT0000259	GXYLT2	727936	NM_001080393	1	1	1	3
hsa-miR-182-5p	MIMAT0000259	HOOK3	84376	NM_032410	1	1	1	3
hsa-miR-182-5p	MIMAT0000259	HOXA10	3206	NM_018951	1	1	1	3
hsa-miR-182-5p	MIMAT0000259	HOXA9	3205	NM_152739	1	1	1	3
hsa-miR-182-5p	MIMAT0000259	IGF1R	3480	NM_000875	1	1	1	3
hsa-miR-182-5p	MIMAT0000259	IGSF3	3321	NM_001007237	1	1	1	3
hsa-miR-182-5p	MIMAT0000259	INSR	3643	NM_001079817	1	1	1	3
hsa-miR-182-5p	MIMAT0000259	INTS6	26512	NM_012141	1	1	1	3
hsa-miR-182-5p	MIMAT0000259	ISY1-RAB43	100534599	NM_001204890	1	1	1	3
hsa-miR-182-5p	MIMAT0000259	JRKL	8690	NM_003772	1	1	1	3
hsa-miR-182-5p	MIMAT0000259	KCNN3	3782	NM_170782	1	1	1	3
hsa-miR-182-5p	MIMAT0000259	KDM5A	5927	NM_001042603	1	1	1	3
hsa-miR-182-5p	MIMAT0000259	KIAA0141	9812	NM_014773	1	1	1	3
hsa-miR-182-5p	MIMAT0000259	KIAA0513	9764	NM_014732	1	1	1	3
hsa-miR-182-5p	MIMAT0000259	KIAA0907	22889	NM_014949	1	1	1	3
hsa-miR-182-5p	MIMAT0000259	KIAA1217	56243	NM_019590	1	1	1	3
hsa-miR-182-5p	MIMAT0000259	KIDINS220	57498	NM_020738	1	1	1	3
hsa-miR-182-5p	MIMAT0000259	KITLG	4254	NM_000899	1	1	1	3
hsa-miR-182-5p	MIMAT0000259	KLF13	51621	NM_015995	1	1	1	3
hsa-miR-182-5p	MIMAT0000259	KLHL5	51088	NM_001007075	1	1	1	3
hsa-miR-182-5p	MIMAT0000259	KLHL9	55958	NM_018847	1	1	1	3
hsa-miR-182-5p	MIMAT0000259	KTN1	3895	NM_001079521	1	1	1	3
hsa-miR-182-5p	MIMAT0000259	LARP4	113251	NM_052879	1	1	1	3
hsa-miR-182-5p	MIMAT0000259	LARS	51520	NM_020117	1	1	1	3
hsa-miR-182-5p	MIMAT0000259	LCA5	167691	NM_001122769	1	1	1	3
hsa-miR-182-5p	MIMAT0000259	LDB3	11155	NM_007078	1	1	1	3
hsa-miR-182-5p	MIMAT0000259	LECT1	11061	NM_001011705	1	1	1	3
hsa-miR-182-5p	MIMAT0000259	LGSN	51557	NM_016571	1	1	1	3
hsa-miR-182-5p	MIMAT0000259	LHX1	3975	NM_005568	1	1	1	3
hsa-miR-182-5p	MIMAT0000259	LIMS1	3987	NM_001193485	1	1	1	3
hsa-miR-182-5p	MIMAT0000259	LMO7	4008	NM_005358	1	1	1	3
hsa-miR-182-5p	MIMAT0000259	LMTK2	22853	NM_014916	1	1	1	3
hsa-miR-182-5p	MIMAT0000259	LOC100653247	100653247	XM_003403788	1	1	1	3
hsa-miR-182-5p	MIMAT0000259	LOX	4015	NM_002317	1	1	1	3
hsa-miR-182-5p	MIMAT0000259	LPHN2	23266	NM_012302	1	1	1	3
hsa-miR-182-5p	MIMAT0000259	LPP	4026	NM_005578	1	1	1	3
hsa-miR-182-5p	MIMAT0000259	LRP3	4037	NM_002333	1	1	1	3
hsa-miR-182-5p	MIMAT0000259	LRRC7	57554	NM_020794	1	1	1	3
hsa-miR-182-5p	MIMAT0000259	LRTM1	57408	NM_020678	1	1	1	3
hsa-miR-182-5p	MIMAT0000259	LSM14A	26065	NM_001114093	1	1	1	3
hsa-miR-182-5p	MIMAT0000259	MAGI1	9223	NM_001033057	1	1	1	3
hsa-miR-182-5p	MIMAT0000259	MAK	4117	NM_001242385	1	1	1	3
hsa-miR-182-5p	MIMAT0000259	MAP9	79884	NM_001039580	1	1	1	3
hsa-miR-182-5p	MIMAT0000259	MAPK1IP1L	93487	NM_144578	1	1	1	3
hsa-miR-182-5p	MIMAT0000259	MAPK9	5601	NM_001135044	1	1	1	3
hsa-miR-182-5p	MIMAT0000259	MARCKS	4082	NM_002356	1	1	1	3
hsa-miR-182-5p	MIMAT0000259	MBNL2	10150	NM_144778	1	1	1	3
hsa-miR-182-5p	MIMAT0000259	MCM9	254394	NM_017696	1	1	1	3
hsa-miR-182-5p	MIMAT0000259	MECOM	2122	NM_001205194	1	1	1	3
hsa-miR-182-5p	MIMAT0000259	MED21	9412	NM_004264	1	1	1	3
hsa-miR-182-5p	MIMAT0000259	MEF2C	4208	NM_001193350	1	1	1	3
hsa-miR-182-5p	MIMAT0000259	MEOX1	4222	NM_001040002	1	1	1	3
hsa-miR-182-5p	MIMAT0000259	MET	4233	NM_001127500	1	1	1	3
hsa-miR-182-5p	MIMAT0000259	METTL4	64863	NM_022840	1	1	1	3
hsa-miR-182-5p	MIMAT0000259	MFAP3	4238	NM_001135037	1	1	1	3
hsa-miR-182-5p	MIMAT0000259	MGLL	11343	NM_007283	1	1	1	3
hsa-miR-182-5p	MIMAT0000259	MITF	4286	NM_198159	1	1	1	3
hsa-miR-182-5p	MIMAT0000259	MLF1IP	79682	NM_024629	1	1	1	3
hsa-miR-182-5p	MIMAT0000259	MLX	6945	NM_170607	1	1	1	3
hsa-miR-182-5p	MIMAT0000259	MMS22L	253714	NM_198468	1	1	1	3
hsa-miR-182-5p	MIMAT0000259	MOB1B	92597	NM_001244766	1	1	1	3
hsa-miR-182-5p	MIMAT0000259	MSH4	4438	NM_002440	1	1	1	3
hsa-miR-182-5p	MIMAT0000259	MSN	4478	NM_002444	1	1	1	3
hsa-miR-182-5p	MIMAT0000259	MTCH2	23788	NM_014342	1	1	1	3
hsa-miR-182-5p	MIMAT0000259	MTSS1	9788	NM_014751	1	1	1	3
hsa-miR-182-5p	MIMAT0000259	MVB12B	89853	NM_001011703	1	1	1	3
hsa-miR-182-5p	MIMAT0000259	MYRIP	25924	NM_015460	1	1	1	3
hsa-miR-182-5p	MIMAT0000259	NADK2	133686	NM_153013	1	1	1	3
hsa-miR-182-5p	MIMAT0000259	NAV1	89796	NM_020443	1	1	1	3
hsa-miR-182-5p	MIMAT0000259	NCALD	83988	NM_001040630	1	1	1	3
hsa-miR-182-5p	MIMAT0000259	NCKAP1	10787	NM_013436	1	1	1	3
hsa-miR-182-5p	MIMAT0000259	NCOA1	8648	NM_147223	1	1	1	3
hsa-miR-182-5p	MIMAT0000259	NDST3	9348	NM_004784	1	1	1	3
hsa-miR-182-5p	MIMAT0000259	NDUFC2	4718	NM_001204054	1	1	1	3
hsa-miR-182-5p	MIMAT0000259	NELL1	4745	NM_201551	1	1	1	3
hsa-miR-182-5p	MIMAT0000259	NF1	4763	NM_001042492	1	1	1	3
hsa-miR-182-5p	MIMAT0000259	NME2	4831	NM_002512	1	1	1	3
hsa-miR-182-5p	MIMAT0000259	NOTCH2	4853	NM_024408	1	1	1	3
hsa-miR-182-5p	MIMAT0000259	NPM1	4869	NM_002520	1	1	1	3
hsa-miR-182-5p	MIMAT0000259	NPR3	4883	NM_000908	1	1	1	3
hsa-miR-182-5p	MIMAT0000259	NPTX1	4884	NM_002522	1	1	1	3
hsa-miR-182-5p	MIMAT0000259	NR5A2	2494	NM_205860	1	1	1	3
hsa-miR-182-5p	MIMAT0000259	NRAS	4893	NM_002524	1	1	1	3
hsa-miR-182-5p	MIMAT0000259	NRCAM	4897	NM_001193582	1	1	1	3
hsa-miR-182-5p	MIMAT0000259	NRN1	51299	NM_016588	1	1	1	3
hsa-miR-182-5p	MIMAT0000259	NT5DC3	51559	NM_001031701	1	1	1	3
hsa-miR-182-5p	MIMAT0000259	NTNG1	22854	NM_001113226	1	1	1	3
hsa-miR-182-5p	MIMAT0000259	NUAK1	9891	NM_014840	1	1	1	3
hsa-miR-182-5p	MIMAT0000259	NYNRIN	57523	NM_025081	1	1	1	3
hsa-miR-182-5p	MIMAT0000259	OAS3	4940	NM_006187	1	1	1	3
hsa-miR-182-5p	MIMAT0000259	OCRL	4952	NM_001587	1	1	1	3
hsa-miR-182-5p	MIMAT0000259	ONECUT2	9480	NM_004852	1	1	1	3
hsa-miR-182-5p	MIMAT0000259	OOEP	441161	NM_001080507	1	1	1	3
hsa-miR-182-5p	MIMAT0000259	OPN5	221391	NM_181744	1	1	1	3
hsa-miR-182-5p	MIMAT0000259	OR51E1	143503	NM_152430	1	1	1	3
hsa-miR-182-5p	MIMAT0000259	OSBPL10	114884	NM_017784	1	1	1	3
hsa-miR-182-5p	MIMAT0000259	OTUB2	78990	NM_023112	1	1	1	3
hsa-miR-182-5p	MIMAT0000259	OTUD6B	51633	NM_016023	1	1	1	3
hsa-miR-182-5p	MIMAT0000259	OXR1	55074	NM_001198533	1	1	1	3
hsa-miR-182-5p	MIMAT0000259	PAFAH1B1	5048	NM_000430	1	1	1	3
hsa-miR-182-5p	MIMAT0000259	PAIP2	51247	NM_001033112	1	1	1	3
hsa-miR-182-5p	MIMAT0000259	PALLD	23022	NM_001166108	1	1	1	3
hsa-miR-182-5p	MIMAT0000259	PAPPA	5069	NM_002581	1	1	1	3
hsa-miR-182-5p	MIMAT0000259	PASK	23178	NM_001252124	1	1	1	3
hsa-miR-182-5p	MIMAT0000259	PBX2	5089	NM_002586	1	1	1	3
hsa-miR-182-5p	MIMAT0000259	PC	5091	NM_001040716	1	1	1	3
hsa-miR-182-5p	MIMAT0000259	PCDH18	54510	NM_019035	1	1	1	3
hsa-miR-182-5p	MIMAT0000259	PCDH8	5100	NM_002590	1	1	1	3
hsa-miR-182-5p	MIMAT0000259	PCMT1	5110	NM_001252049	1	1	1	3
hsa-miR-182-5p	MIMAT0000259	PCNX	22990	NM_014982	1	1	1	3
hsa-miR-182-5p	MIMAT0000259	PDGFD	80310	NM_033135	1	1	1	3
hsa-miR-182-5p	MIMAT0000259	PDGFRA	5156	NM_006206	1	1	1	3
hsa-miR-182-5p	MIMAT0000259	PDK4	5166	NM_002612	1	1	1	3
hsa-miR-182-5p	MIMAT0000259	PEG10	23089	NM_015068	1	1	1	3
hsa-miR-182-5p	MIMAT0000259	PGGT1B	5229	NM_005023	1	1	1	3
hsa-miR-182-5p	MIMAT0000259	PGR	5241	NM_000926	1	1	1	3
hsa-miR-182-5p	MIMAT0000259	PHB	5245	NM_002634	1	1	1	3
hsa-miR-182-5p	MIMAT0000259	PHKB	5257	NM_001031835	1	1	1	3
hsa-miR-182-5p	MIMAT0000259	PKIA	5569	NM_181839	1	1	1	3
hsa-miR-182-5p	MIMAT0000259	PLCB4	5332	NM_001172646	1	1	1	3
hsa-miR-182-5p	MIMAT0000259	PLD6	201164	NM_178836	1	1	1	3
hsa-miR-182-5p	MIMAT0000259	PLEKHH2	130271	NM_172069	1	1	1	3
hsa-miR-182-5p	MIMAT0000259	PPIL1	51645	NM_016059	1	1	1	3
hsa-miR-182-5p	MIMAT0000259	PPIL4	85313	NM_139126	1	1	1	3
hsa-miR-182-5p	MIMAT0000259	PPM1A	5494	NM_021003	1	1	1	3
hsa-miR-182-5p	MIMAT0000259	PPP1R2	5504	NM_006241	1	1	1	3
hsa-miR-182-5p	MIMAT0000259	PPP3R1	5534	NM_000945	1	1	1	3
hsa-miR-182-5p	MIMAT0000259	PRAF2	11230	NM_007213	1	1	1	3
hsa-miR-182-5p	MIMAT0000259	PREPL	9581	NM_001171606	1	1	1	3
hsa-miR-182-5p	MIMAT0000259	PRKACB	5567	NM_001242858	1	1	1	3
hsa-miR-182-5p	MIMAT0000259	PRLR	5618	NM_001204314	1	1	1	3
hsa-miR-182-5p	MIMAT0000259	PROS1	5627	NM_000313	1	1	1	3
hsa-miR-182-5p	MIMAT0000259	PRTG	283659	NM_173814	1	1	1	3
hsa-miR-182-5p	MIMAT0000259	PRUNE2	158471	NM_015225	1	1	1	3
hsa-miR-182-5p	MIMAT0000259	PTAR1	375743	NM_001099666	1	1	1	3
hsa-miR-182-5p	MIMAT0000259	PTCHD1	139411	NM_173495	1	1	1	3
hsa-miR-182-5p	MIMAT0000259	PTGR2	145482	NM_001146155	1	1	1	3
hsa-miR-182-5p	MIMAT0000259	PTHLH	5744	NM_198965	1	1	1	3
hsa-miR-182-5p	MIMAT0000259	PTPRG	5793	NM_002841	1	1	1	3
hsa-miR-182-5p	MIMAT0000259	PURA	5813	NM_005859	1	1	1	3
hsa-miR-182-5p	MIMAT0000259	PYGO2	90780	NM_138300	1	1	1	3
hsa-miR-182-5p	MIMAT0000259	QKI	9444	NM_206855	1	1	1	3
hsa-miR-182-5p	MIMAT0000259	RAB10	10890	NM_016131	1	1	1	3
hsa-miR-182-5p	MIMAT0000259	RAB27B	5874	NM_004163	1	1	1	3
hsa-miR-182-5p	MIMAT0000259	RAB3GAP2	25782	NM_012414	1	1	1	3
hsa-miR-182-5p	MIMAT0000259	RAB3IP	117177	NM_175625	1	1	1	3
hsa-miR-182-5p	MIMAT0000259	RAB43	339122	NM_001204887	1	1	1	3
hsa-miR-182-5p	MIMAT0000259	RAB6B	51560	NM_016577	1	1	1	3
hsa-miR-182-5p	MIMAT0000259	RABIF	5877	NM_002871	1	1	1	3
hsa-miR-182-5p	MIMAT0000259	RAC1	5879	NM_006908	1	1	1	3
hsa-miR-182-5p	MIMAT0000259	RALYL	138046	NM_001100392	1	1	1	3
hsa-miR-182-5p	MIMAT0000259	RAPGEF5	9771	NM_012294	1	1	1	3
hsa-miR-182-5p	MIMAT0000259	RARG	5916	NM_000966	1	1	1	3
hsa-miR-182-5p	MIMAT0000259	RASA1	5921	NM_022650	1	1	1	3
hsa-miR-182-5p	MIMAT0000259	RECK	8434	NM_021111	1	1	1	3
hsa-miR-182-5p	MIMAT0000259	RELL1	768211	NM_001085400	1	1	1	3
hsa-miR-182-5p	MIMAT0000259	RGS17	26575	NM_012419	1	1	1	3
hsa-miR-182-5p	MIMAT0000259	RGS5	8490	NM_003617	1	1	1	3
hsa-miR-182-5p	MIMAT0000259	RHD	6007	NM_001127691	1	1	1	3
hsa-miR-182-5p	MIMAT0000259	RHOBTB1	9886	NM_014836	1	1	1	3
hsa-miR-182-5p	MIMAT0000259	RHOJ	57381	NM_020663	1	1	1	3
hsa-miR-182-5p	MIMAT0000259	RMND5A	64795	NM_022780	1	1	1	3
hsa-miR-182-5p	MIMAT0000259	RNF208	727800	NM_031297	1	1	1	3
hsa-miR-182-5p	MIMAT0000259	RNF212	285498	NM_194439	1	1	1	3
hsa-miR-182-5p	MIMAT0000259	RNF222	643904	NM_001146684	1	1	1	3
hsa-miR-182-5p	MIMAT0000259	RNLS	55328	NM_001031709	1	1	1	3
hsa-miR-182-5p	MIMAT0000259	RPRD1B	58490	NM_021215	1	1	1	3
hsa-miR-182-5p	MIMAT0000259	RRP1B	23076	NM_015056	1	1	1	3
hsa-miR-182-5p	MIMAT0000259	RSAD2	91543	NM_080657	1	1	1	3
hsa-miR-182-5p	MIMAT0000259	SACS	26278	NM_014363	1	1	1	3
hsa-miR-182-5p	MIMAT0000259	SAMD5	389432	NM_001030060	1	1	1	3
hsa-miR-182-5p	MIMAT0000259	SAR1B	51128	NM_016103	1	1	1	3
hsa-miR-182-5p	MIMAT0000259	SCML4	256380	NM_198081	1	1	1	3
hsa-miR-182-5p	MIMAT0000259	SCUBE3	222663	NM_152753	1	1	1	3
hsa-miR-182-5p	MIMAT0000259	SEPHS1	22929	NM_001195604	1	1	1	3
hsa-miR-182-5p	MIMAT0000259	SEPTIN7	989	NM_001011553	1	1	1	3
hsa-miR-182-5p	MIMAT0000259	SEPTIN9	10801	NM_001113491	1	1	1	3
hsa-miR-182-5p	MIMAT0000259	SERINC5	256987	NM_001174072	1	1	1	3
hsa-miR-182-5p	MIMAT0000259	SERPINB2	5055	NM_001143818	1	1	1	3
hsa-miR-182-5p	MIMAT0000259	SERTAD4	56256	NM_019605	1	1	1	3
hsa-miR-182-5p	MIMAT0000259	SGMS2	166929	NM_152621	1	1	1	3
hsa-miR-182-5p	MIMAT0000259	SH2D1A	4068	NM_001114937	1	1	1	3
hsa-miR-182-5p	MIMAT0000259	SH3BGRL	6451	NM_003022	1	1	1	3
hsa-miR-182-5p	MIMAT0000259	SH3BGRL2	83699	NM_031469	1	1	1	3
hsa-miR-182-5p	MIMAT0000259	SHC4	399694	NM_203349	1	1	1	3
hsa-miR-182-5p	MIMAT0000259	SHROOM4	57477	NM_020717	1	1	1	3
hsa-miR-182-5p	MIMAT0000259	SLAIN2	57606	NM_020846	1	1	1	3
hsa-miR-182-5p	MIMAT0000259	SLC1A2	6506	NM_004171	1	1	1	3
hsa-miR-182-5p	MIMAT0000259	SLC23A2	9962	NM_203327	1	1	1	3
hsa-miR-182-5p	MIMAT0000259	SLC25A21	89874	NM_001171170	1	1	1	3
hsa-miR-182-5p	MIMAT0000259	SLC25A46	91137	NM_138773	1	1	1	3
hsa-miR-182-5p	MIMAT0000259	SLC2A3	6515	NM_006931	1	1	1	3
hsa-miR-182-5p	MIMAT0000259	SLC2A8	29988	NM_014580	1	1	1	3
hsa-miR-182-5p	MIMAT0000259	SLC30A1	7779	NM_021194	1	1	1	3
hsa-miR-182-5p	MIMAT0000259	SLC30A7	148867	NM_133496	1	1	1	3
hsa-miR-182-5p	MIMAT0000259	SLC35A5	55032	NM_017945	1	1	1	3
hsa-miR-182-5p	MIMAT0000259	SLC35D1	23169	NM_015139	1	1	1	3
hsa-miR-182-5p	MIMAT0000259	SLC35G1	159371	NM_001134658	1	1	1	3
hsa-miR-182-5p	MIMAT0000259	SLC39A9	55334	NM_018375	1	1	1	3
hsa-miR-182-5p	MIMAT0000259	SLC7A14	57709	NM_020949	1	1	1	3
hsa-miR-182-5p	MIMAT0000259	SLITRK4	139065	NM_001184749	1	1	1	3
hsa-miR-182-5p	MIMAT0000259	SMAD1	4086	NM_001003688	1	1	1	3
hsa-miR-182-5p	MIMAT0000259	SNAI2	6591	NM_003068	1	1	1	3
hsa-miR-182-5p	MIMAT0000259	SNX16	64089	NM_022133	1	1	1	3
hsa-miR-182-5p	MIMAT0000259	SNX19	399979	NM_014758	1	1	1	3
hsa-miR-182-5p	MIMAT0000259	SNX30	401548	NM_001012994	1	1	1	3
hsa-miR-182-5p	MIMAT0000259	SNX4	8723	NM_003794	1	1	1	3
hsa-miR-182-5p	MIMAT0000259	SORT1	6272	NM_002959	1	1	1	3
hsa-miR-182-5p	MIMAT0000259	SOX2	6657	NM_003106	1	1	1	3
hsa-miR-182-5p	MIMAT0000259	SP3	6670	NM_003111	1	1	1	3
hsa-miR-182-5p	MIMAT0000259	SPAG1	6674	NM_172218	1	1	1	3
hsa-miR-182-5p	MIMAT0000259	SPAG17	200162	NM_206996	1	1	1	3
hsa-miR-182-5p	MIMAT0000259	SPIRE1	56907	NM_001128626	1	1	1	3
hsa-miR-182-5p	MIMAT0000259	SRSF6	6431	NM_006275	1	1	1	3
hsa-miR-182-5p	MIMAT0000259	ST8SIA1	6489	NM_003034	1	1	1	3
hsa-miR-182-5p	MIMAT0000259	STARD13	90627	NM_001243476	1	1	1	3
hsa-miR-182-5p	MIMAT0000259	STK19	8859	NM_004197	1	1	1	3
hsa-miR-182-5p	MIMAT0000259	SUV39H2	79723	NM_001193425	1	1	1	3
hsa-miR-182-5p	MIMAT0000259	SYNCRIP	10492	NM_001159676	1	1	1	3
hsa-miR-182-5p	MIMAT0000259	SYNDIG1	79953	NM_024893	1	1	1	3
hsa-miR-182-5p	MIMAT0000259	SYPL1	6856	NM_182715	1	1	1	3
hsa-miR-182-5p	MIMAT0000259	TACC1	6867	NM_001146216	1	1	1	3
hsa-miR-182-5p	MIMAT0000259	TAF15	8148	NM_139215	1	1	1	3
hsa-miR-182-5p	MIMAT0000259	TAF4B	6875	NM_005640	1	1	1	3
hsa-miR-182-5p	MIMAT0000259	TAGLN3	29114	NM_001008272	1	1	1	3
hsa-miR-182-5p	MIMAT0000259	TAT	6898	NM_000353	1	1	1	3
hsa-miR-182-5p	MIMAT0000259	TBC1D12	23232	NM_015188	1	1	1	3
hsa-miR-182-5p	MIMAT0000259	TBC1D15	64786	NM_022771	1	1	1	3
hsa-miR-182-5p	MIMAT0000259	TCEAL7	56849	NM_152278	1	1	1	3
hsa-miR-182-5p	MIMAT0000259	THBS1	7057	NM_003246	1	1	1	3
hsa-miR-182-5p	MIMAT0000259	THBS2	7058	NM_003247	1	1	1	3
hsa-miR-182-5p	MIMAT0000259	TMEM115	11070	NM_007024	1	1	1	3
hsa-miR-182-5p	MIMAT0000259	TMEM140	55281	NM_018295	1	1	1	3
hsa-miR-182-5p	MIMAT0000259	TMEM145	284339	NM_173633	1	1	1	3
hsa-miR-182-5p	MIMAT0000259	TMEM245	23731	NM_032012	1	1	1	3
hsa-miR-182-5p	MIMAT0000259	TMEM47	83604	NM_031442	1	1	1	3
hsa-miR-182-5p	MIMAT0000259	TMEM50B	757	NM_006134	1	1	1	3
hsa-miR-182-5p	MIMAT0000259	TMEM52B	120939	NM_153022	1	1	1	3
hsa-miR-182-5p	MIMAT0000259	TMOD1	7111	NM_003275	1	1	1	3
hsa-miR-182-5p	MIMAT0000259	TNFAIP8	25816	NM_014350	1	1	1	3
hsa-miR-182-5p	MIMAT0000259	TNFRSF9	3604	NM_001561	1	1	1	3
hsa-miR-182-5p	MIMAT0000259	TNFSF11	8600	NM_003701	1	1	1	3
hsa-miR-182-5p	MIMAT0000259	TOMM20	9804	NM_014765	1	1	1	3
hsa-miR-182-5p	MIMAT0000259	TPST2	8459	NM_003595	1	1	1	3
hsa-miR-182-5p	MIMAT0000259	TRABD2B	388630	NM_001194986	1	1	1	3
hsa-miR-182-5p	MIMAT0000259	TRIQK	286144	NM_001171796	1	1	1	3
hsa-miR-182-5p	MIMAT0000259	TRPM6	140803	NM_017662	1	1	1	3
hsa-miR-182-5p	MIMAT0000259	TRUB1	142940	NM_139169	1	1	1	3
hsa-miR-182-5p	MIMAT0000259	TSN	7247	NM_004622	1	1	1	3
hsa-miR-182-5p	MIMAT0000259	TSNAX	7257	NM_005999	1	1	1	3
hsa-miR-182-5p	MIMAT0000259	TSPAN14	81619	NM_030927	1	1	1	3
hsa-miR-182-5p	MIMAT0000259	TTC4	7268	NM_004623	1	1	1	3
hsa-miR-182-5p	MIMAT0000259	TWISTNB	221830	NM_001002926	1	1	1	3
hsa-miR-182-5p	MIMAT0000259	UBASH3B	84959	NM_032873	1	1	1	3
hsa-miR-182-5p	MIMAT0000259	UBE2Q2	92912	NM_001145335	1	1	1	3
hsa-miR-182-5p	MIMAT0000259	UGT2B17	7367	NM_001077	1	1	1	3
hsa-miR-182-5p	MIMAT0000259	USP13	8975	NM_003940	1	1	1	3
hsa-miR-182-5p	MIMAT0000259	USP6NL	9712	NM_014688	1	1	1	3
hsa-miR-182-5p	MIMAT0000259	VAMP3	9341	NM_004781	1	1	1	3
hsa-miR-182-5p	MIMAT0000259	VEZT	55591	NM_017599	1	1	1	3
hsa-miR-182-5p	MIMAT0000259	VGLL3	389136	NM_016206	1	1	1	3
hsa-miR-182-5p	MIMAT0000259	VLDLR	7436	NM_001018056	1	1	1	3
hsa-miR-182-5p	MIMAT0000259	WASL	8976	NM_003941	1	1	1	3
hsa-miR-182-5p	MIMAT0000259	WDR44	54521	NM_019045	1	1	1	3
hsa-miR-182-5p	MIMAT0000259	WDR76	79968	NM_024908	1	1	1	3
hsa-miR-182-5p	MIMAT0000259	WFDC8	90199	NM_130896	1	1	1	3
hsa-miR-182-5p	MIMAT0000259	WIPF2	147179	NM_133264	1	1	1	3
hsa-miR-182-5p	MIMAT0000259	WIPI2	26100	NM_015610	1	1	1	3
hsa-miR-182-5p	MIMAT0000259	WISP1	8840	NM_003882	1	1	1	3
hsa-miR-182-5p	MIMAT0000259	WWC2	80014	NM_024949	1	1	1	3
hsa-miR-182-5p	MIMAT0000259	YAF2	10138	NM_001190980	1	1	1	3
hsa-miR-182-5p	MIMAT0000259	YES1	7525	NM_005433	1	1	1	3
hsa-miR-182-5p	MIMAT0000259	YWHAG	7532	NM_012479	1	1	1	3
hsa-miR-182-5p	MIMAT0000259	ZBTB44	29068	NM_014155	1	1	1	3
hsa-miR-182-5p	MIMAT0000259	ZC3H12C	85463	NM_033390	1	1	1	3
hsa-miR-182-5p	MIMAT0000259	ZCCHC14	23174	NM_015144	1	1	1	3
hsa-miR-182-5p	MIMAT0000259	ZFAND4	93550	NM_001128324	1	1	1	3
hsa-miR-182-5p	MIMAT0000259	ZFC3H1	196441	NM_144982	1	1	1	3
hsa-miR-182-5p	MIMAT0000259	ZFP14	57677	NM_020917	1	1	1	3
hsa-miR-182-5p	MIMAT0000259	ZFP30	22835	NM_014898	1	1	1	3
hsa-miR-182-5p	MIMAT0000259	ZFP36L1	677	NM_001244701	1	1	1	3
hsa-miR-182-5p	MIMAT0000259	ZNF200	7752	NM_001145446	1	1	1	3
hsa-miR-182-5p	MIMAT0000259	ZNF208	7757	NM_007153	1	1	1	3
hsa-miR-182-5p	MIMAT0000259	ZNF24	7572	NM_006965	1	1	1	3
hsa-miR-182-5p	MIMAT0000259	ZNF254	9534	NM_203282	1	1	1	3
hsa-miR-182-5p	MIMAT0000259	ZNF280B	140883	NM_080764	1	1	1	3
hsa-miR-182-5p	MIMAT0000259	ZNF398	57541	NM_170686	1	1	1	3
hsa-miR-182-5p	MIMAT0000259	ZNF529	57711	NM_001145650	1	1	1	3
hsa-miR-182-5p	MIMAT0000259	ZNF607	84775	NM_001172677	1	1	1	3
hsa-miR-182-5p	MIMAT0000259	ZNF704	619279	NM_001033723	1	1	1	3
hsa-miR-182-5p	MIMAT0000259	ZNF705A	440077	NM_001004328	1	1	1	3
hsa-miR-182-5p	MIMAT0000259	ZNF792	126375	NM_175872	1	1	1	3
hsa-miR-182-5p	MIMAT0000259	ZNF805	390980	NM_001023563	1	1	1	3
hsa-miR-182-5p	MIMAT0000259	ZNF831	128611	NM_178457	1	1	1	3
hsa-miR-182-5p	MIMAT0000259	ZNRF1	84937	NM_032268	1	1	1	3
hsa-miR-182-5p	MIMAT0000259	ZXDA	7789	NM_007156	1	1	1	3
hsa-miR-183-5p	MIMAT0000261	A1CF	29974	NM_001198819	1	1	1	3
hsa-miR-183-5p	MIMAT0000261	ABAT	18	NM_001127448	1	1	1	3
hsa-miR-183-5p	MIMAT0000261	ABCB10	23456	NM_012089	1	1	1	3
hsa-miR-183-5p	MIMAT0000261	ACER2	340485	NM_001010887	1	1	1	3
hsa-miR-183-5p	MIMAT0000261	ACVR2B	93	NM_001106	1	1	1	3
hsa-miR-183-5p	MIMAT0000261	AKAP12	9590	NM_005100	1	1	1	3
hsa-miR-183-5p	MIMAT0000261	ALDH5A1	7915	NM_001080	1	1	1	3
hsa-miR-183-5p	MIMAT0000261	AMD1	262	NM_001033059	1	1	1	3
hsa-miR-183-5p	MIMAT0000261	AMIGO2	347902	NM_001143668	1	1	1	3
hsa-miR-183-5p	MIMAT0000261	ANKRD26	22852	NM_014915	1	1	1	3
hsa-miR-183-5p	MIMAT0000261	ANKRD50	57182	NM_001167882	1	1	1	3
hsa-miR-183-5p	MIMAT0000261	ARHGAP21	57584	NM_020824	1	1	1	3
hsa-miR-183-5p	MIMAT0000261	ARHGAP26	23092	NM_015071	1	1	1	3
hsa-miR-183-5p	MIMAT0000261	ARHGEF18	23370	NM_001130955	1	1	1	3
hsa-miR-183-5p	MIMAT0000261	ARPP19	10776	NM_006628	1	1	1	3
hsa-miR-183-5p	MIMAT0000261	ATG12	9140	NM_004707	1	1	1	3
hsa-miR-183-5p	MIMAT0000261	ATP2B4	493	NM_001684	1	1	1	3
hsa-miR-183-5p	MIMAT0000261	ATP2C1	27032	NM_001199181	1	1	1	3
hsa-miR-183-5p	MIMAT0000261	AUTS2	26053	NM_015570	1	1	1	3
hsa-miR-183-5p	MIMAT0000261	BNIP3L	665	NM_004331	1	1	1	3
hsa-miR-183-5p	MIMAT0000261	BTG1	694	NM_001731	1	1	1	3
hsa-miR-183-5p	MIMAT0000261	C16orf72	29035	NM_014117	1	1	1	3
hsa-miR-183-5p	MIMAT0000261	C2orf44	80304	NM_001142319	1	1	1	3
hsa-miR-183-5p	MIMAT0000261	CACNA1E	777	NM_001205294	1	1	1	3
hsa-miR-183-5p	MIMAT0000261	CCDC121	79635	NM_001142683	1	1	1	3
hsa-miR-183-5p	MIMAT0000261	CCDC50	152137	NM_178335	1	1	1	3
hsa-miR-183-5p	MIMAT0000261	CCL18	6362	NM_002988	1	1	1	3
hsa-miR-183-5p	MIMAT0000261	CDC42EP3	10602	NM_006449	1	1	1	3
hsa-miR-183-5p	MIMAT0000261	CDC73	79577	NM_024529	1	1	1	3
hsa-miR-183-5p	MIMAT0000261	CDK5R1	8851	NM_003885	1	1	1	3
hsa-miR-183-5p	MIMAT0000261	CELF1	10658	NM_001172640	1	1	1	3
hsa-miR-183-5p	MIMAT0000261	CELF2	10659	NM_001025077	1	1	1	3
hsa-miR-183-5p	MIMAT0000261	CEP170B	283638	NM_015005	1	1	1	3
hsa-miR-183-5p	MIMAT0000261	CLIP1	6249	NM_001247997	1	1	1	3
hsa-miR-183-5p	MIMAT0000261	CNOT6	57472	NM_015455	1	1	1	3
hsa-miR-183-5p	MIMAT0000261	COL12A1	1303	NM_004370	1	1	1	3
hsa-miR-183-5p	MIMAT0000261	CPM	1368	NM_001874	1	1	1	3
hsa-miR-183-5p	MIMAT0000261	CSMD1	64478	NM_033225	1	1	1	3
hsa-miR-183-5p	MIMAT0000261	CSN1S1	1446	NM_001890	1	1	1	3
hsa-miR-183-5p	MIMAT0000261	CTDSP1	58190	NM_021198	1	1	1	3
hsa-miR-183-5p	MIMAT0000261	CTDSPL	10217	NM_001008392	1	1	1	3
hsa-miR-183-5p	MIMAT0000261	DDHD1	80821	NM_030637	1	1	1	3
hsa-miR-183-5p	MIMAT0000261	DEPDC5	9681	NM_001007188	1	1	1	3
hsa-miR-183-5p	MIMAT0000261	DHRSX	207063	NM_145177	1	1	1	3
hsa-miR-183-5p	MIMAT0000261	DNALI1	7802	NM_003462	1	1	1	3
hsa-miR-183-5p	MIMAT0000261	DNHD1	144132	NM_173589	1	1	1	3
hsa-miR-183-5p	MIMAT0000261	DUSP10	11221	NM_007207	1	1	1	3
hsa-miR-183-5p	MIMAT0000261	ENAH	55740	NM_018212	1	1	1	3
hsa-miR-183-5p	MIMAT0000261	EPB41L4B	54566	NM_018424	1	1	1	3
hsa-miR-183-5p	MIMAT0000261	EYA4	2070	NM_172105	1	1	1	3
hsa-miR-183-5p	MIMAT0000261	EZR	7430	NM_001111077	1	1	1	3
hsa-miR-183-5p	MIMAT0000261	FAM175B	23172	NM_032182	1	1	1	3
hsa-miR-183-5p	MIMAT0000261	FAM217B	63939	NM_022106	1	1	1	3
hsa-miR-183-5p	MIMAT0000261	FCHO2	115548	NM_001146032	1	1	1	3
hsa-miR-183-5p	MIMAT0000261	FOXN2	3344	NM_002158	1	1	1	3
hsa-miR-183-5p	MIMAT0000261	FRMD6	122786	NM_001042481	1	1	1	3
hsa-miR-183-5p	MIMAT0000261	FRS2	10818	NM_006654	1	1	1	3
hsa-miR-183-5p	MIMAT0000261	FUT2	2524	NM_001097638	1	1	1	3
hsa-miR-183-5p	MIMAT0000261	GCLM	2730	NM_002061	1	1	1	3
hsa-miR-183-5p	MIMAT0000261	GFPT1	2673	NM_002056	1	1	1	3
hsa-miR-183-5p	MIMAT0000261	GJA3	2700	NM_021954	1	1	1	3
hsa-miR-183-5p	MIMAT0000261	GNG5	2787	NM_005274	1	1	1	3
hsa-miR-183-5p	MIMAT0000261	GOLGA6C	653641	NM_001164404	1	1	1	3
hsa-miR-183-5p	MIMAT0000261	GPAM	57678	NM_001244949	1	1	1	3
hsa-miR-183-5p	MIMAT0000261	GPANK1	7918	NM_033177	1	1	1	3
hsa-miR-183-5p	MIMAT0000261	GPR34	2857	NM_005300	1	1	1	3
hsa-miR-183-5p	MIMAT0000261	GTF2H1	2965	NM_001142307	1	1	1	3
hsa-miR-183-5p	MIMAT0000261	GYPA	2993	NM_002099	1	1	1	3
hsa-miR-183-5p	MIMAT0000261	HCN1	348980	NM_021072	1	1	1	3
hsa-miR-183-5p	MIMAT0000261	HDDC2	51020	NM_016063	1	1	1	3
hsa-miR-183-5p	MIMAT0000261	IDH2	3418	NM_002168	1	1	1	3
hsa-miR-183-5p	MIMAT0000261	IL15RA	3601	NM_002189	1	1	1	3
hsa-miR-183-5p	MIMAT0000261	IL6ST	3572	NM_002184	1	1	1	3
hsa-miR-183-5p	MIMAT0000261	IMPAD1	54928	NM_017813	1	1	1	3
hsa-miR-183-5p	MIMAT0000261	IPPK	64768	NM_022755	1	1	1	3
hsa-miR-183-5p	MIMAT0000261	IRS1	3667	NM_005544	1	1	1	3
hsa-miR-183-5p	MIMAT0000261	ITGB1	3688	NM_002211	1	1	1	3
hsa-miR-183-5p	MIMAT0000261	KBTBD6	89890	NM_152903	1	1	1	3
hsa-miR-183-5p	MIMAT0000261	KCND2	3751	NM_012281	1	1	1	3
hsa-miR-183-5p	MIMAT0000261	KCNK10	54207	NM_138317	1	1	1	3
hsa-miR-183-5p	MIMAT0000261	KCNK2	3776	NM_001017425	1	1	1	3
hsa-miR-183-5p	MIMAT0000261	KCNMB1	3779	NM_004137	1	1	1	3
hsa-miR-183-5p	MIMAT0000261	KIF2A	3796	NM_001243952	1	1	1	3
hsa-miR-183-5p	MIMAT0000261	KLHL23	151230	NM_144711	1	1	1	3
hsa-miR-183-5p	MIMAT0000261	KLHL24	54800	NM_017644	1	1	1	3
hsa-miR-183-5p	MIMAT0000261	KLRD1	3824	NM_001114396	1	1	1	3
hsa-miR-183-5p	MIMAT0000261	L3MBTL3	84456	NM_032438	1	1	1	3
hsa-miR-183-5p	MIMAT0000261	LATS2	26524	NM_014572	1	1	1	3
hsa-miR-183-5p	MIMAT0000261	LCK	3932	NM_005356	1	1	1	3
hsa-miR-183-5p	MIMAT0000261	LMBR1	64327	NM_022458	1	1	1	3
hsa-miR-183-5p	MIMAT0000261	LOC200726	200726	NM_001102659	1	1	1	3
hsa-miR-183-5p	MIMAT0000261	LOX	4015	NM_001178102	1	1	1	3
hsa-miR-183-5p	MIMAT0000261	LRP6	4040	NM_002336	1	1	1	3
hsa-miR-183-5p	MIMAT0000261	LYN	4067	NM_001111097	1	1	1	3
hsa-miR-183-5p	MIMAT0000261	MACROD2	140733	NM_080676	1	1	1	3
hsa-miR-183-5p	MIMAT0000261	MAL2	114569	NM_052886	1	1	1	3
hsa-miR-183-5p	MIMAT0000261	MAP3K4	4216	NM_005922	1	1	1	3
hsa-miR-183-5p	MIMAT0000261	MAPK8IP1	9479	NM_005456	1	1	1	3
hsa-miR-183-5p	MIMAT0000261	MBNL1	4154	NM_021038	1	1	1	3
hsa-miR-183-5p	MIMAT0000261	MED12L	116931	NM_053002	1	1	1	3
hsa-miR-183-5p	MIMAT0000261	MEF2C	4208	NM_001193350	1	1	1	3
hsa-miR-183-5p	MIMAT0000261	MFSD6	54842	NM_017694	1	1	1	3
hsa-miR-183-5p	MIMAT0000261	MIA3	375056	NM_198551	1	1	1	3
hsa-miR-183-5p	MIMAT0000261	MICB	4277	NM_005931	1	1	1	3
hsa-miR-183-5p	MIMAT0000261	MID2	11043	NM_052817	1	1	1	3
hsa-miR-183-5p	MIMAT0000261	MON2	23041	NM_015026	1	1	1	3
hsa-miR-183-5p	MIMAT0000261	MTERFD3	80298	NM_025198	1	1	1	3
hsa-miR-183-5p	MIMAT0000261	MYF6	4618	NM_002469	1	1	1	3
hsa-miR-183-5p	MIMAT0000261	MYO1B	4430	NM_001161819	1	1	1	3
hsa-miR-183-5p	MIMAT0000261	MYO5B	4645	NM_001080467	1	1	1	3
hsa-miR-183-5p	MIMAT0000261	NARS2	79731	NM_024678	1	1	1	3
hsa-miR-183-5p	MIMAT0000261	NCK2	8440	NM_001004720	1	1	1	3
hsa-miR-183-5p	MIMAT0000261	NEFL	4747	NM_006158	1	1	1	3
hsa-miR-183-5p	MIMAT0000261	NFKB1	4790	NM_001165412	1	1	1	3
hsa-miR-183-5p	MIMAT0000261	NPAS3	64067	NM_001164749	1	1	1	3
hsa-miR-183-5p	MIMAT0000261	NTN4	59277	NM_021229	1	1	1	3
hsa-miR-183-5p	MIMAT0000261	NTRK2	4915	NM_001018065	1	1	1	3
hsa-miR-183-5p	MIMAT0000261	NUDT4	11163	NM_019094	1	1	1	3
hsa-miR-183-5p	MIMAT0000261	OAS3	4940	NM_006187	1	1	1	3
hsa-miR-183-5p	MIMAT0000261	OR7A5	26659	NM_017506	1	1	1	3
hsa-miR-183-5p	MIMAT0000261	OTUD4	54726	NM_017493	1	1	1	3
hsa-miR-183-5p	MIMAT0000261	PAFAH2	5051	NM_000437	1	1	1	3
hsa-miR-183-5p	MIMAT0000261	PAM	5066	NM_001177306	1	1	1	3
hsa-miR-183-5p	MIMAT0000261	PCGF6	84108	NM_032154	1	1	1	3
hsa-miR-183-5p	MIMAT0000261	PCK2	5106	NM_004563	1	1	1	3
hsa-miR-183-5p	MIMAT0000261	PEX19	5824	NM_002857	1	1	1	3
hsa-miR-183-5p	MIMAT0000261	PFN2	5217	NM_002628	1	1	1	3
hsa-miR-183-5p	MIMAT0000261	PI15	51050	NM_015886	1	1	1	3
hsa-miR-183-5p	MIMAT0000261	PIAS2	9063	NM_173206	1	1	1	3
hsa-miR-183-5p	MIMAT0000261	PIGX	54965	NM_017861	1	1	1	3
hsa-miR-183-5p	MIMAT0000261	PKD2	5311	NM_000297	1	1	1	3
hsa-miR-183-5p	MIMAT0000261	PLAG1	5324	NM_001114634	1	1	1	3
hsa-miR-183-5p	MIMAT0000261	PLAGL2	5326	NM_002657	1	1	1	3
hsa-miR-183-5p	MIMAT0000261	PLCB4	5332	NM_001172646	1	1	1	3
hsa-miR-183-5p	MIMAT0000261	POLR1C	9533	NM_203290	1	1	1	3
hsa-miR-183-5p	MIMAT0000261	PPM1A	5494	NM_021003	1	1	1	3
hsa-miR-183-5p	MIMAT0000261	PPP2CA	5515	NM_002715	1	1	1	3
hsa-miR-183-5p	MIMAT0000261	PPP2CB	5516	NM_001009552	1	1	1	3
hsa-miR-183-5p	MIMAT0000261	PRKRIR	5612	NM_004705	1	1	1	3
hsa-miR-183-5p	MIMAT0000261	PSEN2	5664	NM_000447	1	1	1	3
hsa-miR-183-5p	MIMAT0000261	PTGS2	5743	NM_000963	1	1	1	3
hsa-miR-183-5p	MIMAT0000261	PTPN14	5784	NM_005401	1	1	1	3
hsa-miR-183-5p	MIMAT0000261	PTPN4	5775	NM_002830	1	1	1	3
hsa-miR-183-5p	MIMAT0000261	QKI	9444	NM_206854	1	1	1	3
hsa-miR-183-5p	MIMAT0000261	RAB27B	5874	NM_004163	1	1	1	3
hsa-miR-183-5p	MIMAT0000261	RAB8B	51762	NM_016530	1	1	1	3
hsa-miR-183-5p	MIMAT0000261	RALA	5898	NM_005402	1	1	1	3
hsa-miR-183-5p	MIMAT0000261	RBMS1	5937	NM_016836	1	1	1	3
hsa-miR-183-5p	MIMAT0000261	RCN2	5955	NM_002902	1	1	1	3
hsa-miR-183-5p	MIMAT0000261	RELL1	768211	NM_001085400	1	1	1	3
hsa-miR-183-5p	MIMAT0000261	REV1	51455	NM_001037872	1	1	1	3
hsa-miR-183-5p	MIMAT0000261	RNF2	6045	NM_007212	1	1	1	3
hsa-miR-183-5p	MIMAT0000261	RNMT	8731	NM_003799	1	1	1	3
hsa-miR-183-5p	MIMAT0000261	ROBO2	6092	NM_001128929	1	1	1	3
hsa-miR-183-5p	MIMAT0000261	SACS	26278	NM_014363	1	1	1	3
hsa-miR-183-5p	MIMAT0000261	SEL1L	6400	NM_005065	1	1	1	3
hsa-miR-183-5p	MIMAT0000261	SLAIN1	122060	NM_001242868	1	1	1	3
hsa-miR-183-5p	MIMAT0000261	SLC1A2	6506	NM_004171	1	1	1	3
hsa-miR-183-5p	MIMAT0000261	SLC22A23	63027	NM_015482	1	1	1	3
hsa-miR-183-5p	MIMAT0000261	SLC25A15	10166	NM_014252	1	1	1	3
hsa-miR-183-5p	MIMAT0000261	SLC6A19	340024	NM_001003841	1	1	1	3
hsa-miR-183-5p	MIMAT0000261	SMAD4	4089	NM_005359	1	1	1	3
hsa-miR-183-5p	MIMAT0000261	SMCO4	56935	NM_020179	1	1	1	3
hsa-miR-183-5p	MIMAT0000261	SNX1	6642	NM_003099	1	1	1	3
hsa-miR-183-5p	MIMAT0000261	SOCS6	9306	NM_004232	1	1	1	3
hsa-miR-183-5p	MIMAT0000261	SPRY2	10253	NM_005842	1	1	1	3
hsa-miR-183-5p	MIMAT0000261	SREK1IP1	285672	NM_173829	1	1	1	3
hsa-miR-183-5p	MIMAT0000261	SRSF2	6427	NM_003016	1	1	1	3
hsa-miR-183-5p	MIMAT0000261	ST8SIA3	51046	NM_015879	1	1	1	3
hsa-miR-183-5p	MIMAT0000261	STC1	6781	NM_003155	1	1	1	3
hsa-miR-183-5p	MIMAT0000261	STX18	53407	NM_016930	1	1	1	3
hsa-miR-183-5p	MIMAT0000261	SYNPO2	171024	NM_133477	1	1	1	3
hsa-miR-183-5p	MIMAT0000261	TAB3	257397	NM_152787	1	1	1	3
hsa-miR-183-5p	MIMAT0000261	TCF12	6938	NM_003205	1	1	1	3
hsa-miR-183-5p	MIMAT0000261	TCF4	6925	NM_001243232	1	1	1	3
hsa-miR-183-5p	MIMAT0000261	TCF7L2	6934	NM_001146285	1	1	1	3
hsa-miR-183-5p	MIMAT0000261	TMEM129	92305	NM_138385	1	1	1	3
hsa-miR-183-5p	MIMAT0000261	TMEM135	65084	NM_001168724	1	1	1	3
hsa-miR-183-5p	MIMAT0000261	TMEM184C	55751	NM_018241	1	1	1	3
hsa-miR-183-5p	MIMAT0000261	TMPO	7112	NM_001032283	1	1	1	3
hsa-miR-183-5p	MIMAT0000261	TMSB4X	7114	NM_021109	1	1	1	3
hsa-miR-183-5p	MIMAT0000261	TPD52L3	89882	NM_033516	1	1	1	3
hsa-miR-183-5p	MIMAT0000261	TRIM27	5987	NM_006510	1	1	1	3
hsa-miR-183-5p	MIMAT0000261	TSGA10	80705	NM_025244	1	1	1	3
hsa-miR-183-5p	MIMAT0000261	TTC26	79989	NM_024926	1	1	1	3
hsa-miR-183-5p	MIMAT0000261	TTC7B	145567	NM_001010854	1	1	1	3
hsa-miR-183-5p	MIMAT0000261	VAMP7	6845	NM_005638	1	1	1	3
hsa-miR-183-5p	MIMAT0000261	WDFY1	57590	NM_020830	1	1	1	3
hsa-miR-183-5p	MIMAT0000261	XPNPEP3	63929	NM_001204827	1	1	1	3
hsa-miR-183-5p	MIMAT0000261	YAF2	10138	NM_001190979	1	1	1	3
hsa-miR-183-5p	MIMAT0000261	YPEL5	51646	NM_001127399	1	1	1	3
hsa-miR-183-5p	MIMAT0000261	ZFAND5	7763	NM_001102421	1	1	1	3
hsa-miR-183-5p	MIMAT0000261	ZHX3	23051	NM_015035	1	1	1	3
hsa-miR-183-5p	MIMAT0000261	ZMYM2	7750	NM_197968	1	1	1	3
hsa-miR-183-5p	MIMAT0000261	ZNF197	10168	NM_001024855	1	1	1	3
hsa-miR-183-5p	MIMAT0000261	ZNF750	79755	NM_024702	1	1	1	3
hsa-miR-183-5p	MIMAT0000261	ZNF770	54989	NM_014106	1	1	1	3
hsa-miR-18b-3p	MIMAT0004751	ADCYAP1	116	NM_001117	1	1	1	3
hsa-miR-18b-3p	MIMAT0004751	ANKRD12	23253	NM_015208	1	1	1	3
hsa-miR-18b-3p	MIMAT0004751	ANKRD52	283373	NM_173595	1	1	1	3
hsa-miR-18b-3p	MIMAT0004751	APOL6	80830	NM_030641	1	1	1	3
hsa-miR-18b-3p	MIMAT0004751	AQPEP	206338	NM_173800	1	1	1	3
hsa-miR-18b-3p	MIMAT0004751	BBS2	583	NM_031885	1	1	1	3
hsa-miR-18b-3p	MIMAT0004751	C17orf102	400591	NM_207454	1	1	1	3
hsa-miR-18b-3p	MIMAT0004751	C18orf25	147339	NM_145055	1	1	1	3
hsa-miR-18b-3p	MIMAT0004751	CACUL1	143384	NM_153810	1	1	1	3
hsa-miR-18b-3p	MIMAT0004751	CAPRIN1	4076	NM_005898	1	1	1	3
hsa-miR-18b-3p	MIMAT0004751	CCDC73	493860	NM_001008391	1	1	1	3
hsa-miR-18b-3p	MIMAT0004751	CD44	960	NM_001202555	1	1	1	3
hsa-miR-18b-3p	MIMAT0004751	CDC14A	8556	NM_033313	1	1	1	3
hsa-miR-18b-3p	MIMAT0004751	CERS3	204219	NM_178842	1	1	1	3
hsa-miR-18b-3p	MIMAT0004751	CNST	163882	NM_152609	1	1	1	3
hsa-miR-18b-3p	MIMAT0004751	DAAM2	23500	NM_001201427	1	1	1	3
hsa-miR-18b-3p	MIMAT0004751	DSTN	11034	NM_001011546	1	1	1	3
hsa-miR-18b-3p	MIMAT0004751	EIF2AK2	5610	NM_001135651	1	1	1	3
hsa-miR-18b-3p	MIMAT0004751	EMP2	2013	NM_001424	1	1	1	3
hsa-miR-18b-3p	MIMAT0004751	EVI5	7813	NM_005665	1	1	1	3
hsa-miR-18b-3p	MIMAT0004751	FAM228A	653140	NM_001040710	1	1	1	3
hsa-miR-18b-3p	MIMAT0004751	FLT3	2322	NM_004119	1	1	1	3
hsa-miR-18b-3p	MIMAT0004751	FOXE1	2304	NM_004473	1	1	1	3
hsa-miR-18b-3p	MIMAT0004751	FZD1	8321	NM_003505	1	1	1	3
hsa-miR-18b-3p	MIMAT0004751	GALK2	2585	NM_002044	1	1	1	3
hsa-miR-18b-3p	MIMAT0004751	HNRNPUL2	221092	NM_001079559	1	1	1	3
hsa-miR-18b-3p	MIMAT0004751	IL7	3574	NM_001199887	1	1	1	3
hsa-miR-18b-3p	MIMAT0004751	INO80D	54891	NM_017759	1	1	1	3
hsa-miR-18b-3p	MIMAT0004751	INPPL1	3636	NM_001567	1	1	1	3
hsa-miR-18b-3p	MIMAT0004751	IP6K2	51447	NM_001190317	1	1	1	3
hsa-miR-18b-3p	MIMAT0004751	ITGB1	3688	NM_002211	1	1	1	3
hsa-miR-18b-3p	MIMAT0004751	KCNRG	283518	NM_173605	1	1	1	3
hsa-miR-18b-3p	MIMAT0004751	LGALS8	3964	NM_201544	1	1	1	3
hsa-miR-18b-3p	MIMAT0004751	LRP3	4037	NM_002333	1	1	1	3
hsa-miR-18b-3p	MIMAT0004751	MARCHF5	54708	NM_017824	1	1	1	3
hsa-miR-18b-3p	MIMAT0004751	NEK2	4751	NM_001204183	1	1	1	3
hsa-miR-18b-3p	MIMAT0004751	NMD3	51068	NM_015938	1	1	1	3
hsa-miR-18b-3p	MIMAT0004751	NOC3L	64318	NM_022451	1	1	1	3
hsa-miR-18b-3p	MIMAT0004751	NOVA1	4857	NM_006489	1	1	1	3
hsa-miR-18b-3p	MIMAT0004751	NUP98	4928	NM_016320	1	1	1	3
hsa-miR-18b-3p	MIMAT0004751	OR11A1	26531	NM_013937	1	1	1	3
hsa-miR-18b-3p	MIMAT0004751	PAFAH1B1	5048	NM_000430	1	1	1	3
hsa-miR-18b-3p	MIMAT0004751	PDE4DIP	9659	NM_001002811	1	1	1	3
hsa-miR-18b-3p	MIMAT0004751	PEX3	8504	NM_003630	1	1	1	3
hsa-miR-18b-3p	MIMAT0004751	PLRG1	5356	NM_001201564	1	1	1	3
hsa-miR-18b-3p	MIMAT0004751	PM20D1	148811	NM_152491	1	1	1	3
hsa-miR-18b-3p	MIMAT0004751	PTBP2	58155	NM_021190	1	1	1	3
hsa-miR-18b-3p	MIMAT0004751	RAD21	5885	NM_006265	1	1	1	3
hsa-miR-18b-3p	MIMAT0004751	RBFOX1	54715	NM_145892	1	1	1	3
hsa-miR-18b-3p	MIMAT0004751	RCHY1	25898	NM_001009922	1	1	1	3
hsa-miR-18b-3p	MIMAT0004751	RHOXF2	84528	NM_032498	1	1	1	3
hsa-miR-18b-3p	MIMAT0004751	RHOXF2B	727940	NM_001099685	1	1	1	3
hsa-miR-18b-3p	MIMAT0004751	SCAI	286205	NM_001144877	1	1	1	3
hsa-miR-18b-3p	MIMAT0004751	SEC63	11231	NM_007214	1	1	1	3
hsa-miR-18b-3p	MIMAT0004751	SLC12A2	6558	NM_001046	1	1	1	3
hsa-miR-18b-3p	MIMAT0004751	SLC7A1	6541	NM_003045	1	1	1	3
hsa-miR-18b-3p	MIMAT0004751	SUDS3	64426	NM_022491	1	1	1	3
hsa-miR-18b-3p	MIMAT0004751	SWT1	54823	NM_001105518	1	1	1	3
hsa-miR-18b-3p	MIMAT0004751	SYTL2	54843	NM_001162951	1	1	1	3
hsa-miR-18b-3p	MIMAT0004751	TANC1	85461	NM_001145909	1	1	1	3
hsa-miR-18b-3p	MIMAT0004751	TBCEL	219899	NM_001130047	1	1	1	3
hsa-miR-18b-3p	MIMAT0004751	TNN	63923	NM_022093	1	1	1	3
hsa-miR-18b-3p	MIMAT0004751	TOP1	7150	NM_003286	1	1	1	3
hsa-miR-18b-3p	MIMAT0004751	UBA5	79876	NM_024818	1	1	1	3
hsa-miR-18b-3p	MIMAT0004751	USP48	84196	NM_032236	1	1	1	3
hsa-miR-18b-3p	MIMAT0004751	VAMP7	6845	NM_005638	1	1	1	3
hsa-miR-18b-3p	MIMAT0004751	VGLL3	389136	NM_016206	1	1	1	3
hsa-miR-18b-3p	MIMAT0004751	VWA8	23078	NM_015058	1	1	1	3
hsa-miR-18b-3p	MIMAT0004751	ZCCHC10	54819	NM_017665	1	1	1	3
hsa-miR-18b-3p	MIMAT0004751	ZNF143	7702	NM_003442	1	1	1	3
hsa-miR-18b-3p	MIMAT0004751	ZNF37A	7587	NM_003421	1	1	1	3
hsa-miR-18b-3p	MIMAT0004751	ZNF483	158399	NM_133464	1	1	1	3
hsa-miR-18b-3p	MIMAT0004751	ZNF644	84146	NM_016620	1	1	1	3
hsa-miR-196b-5p	MIMAT0001080	ALDH1L2	160428	NM_001034173	1	1	1	3
hsa-miR-196b-5p	MIMAT0001080	AQP4	361	NM_001650	1	1	1	3
hsa-miR-196b-5p	MIMAT0001080	ARHGAP11A	9824	NM_014783	1	1	1	3
hsa-miR-196b-5p	MIMAT0001080	ARL5A	26225	NM_177985	1	1	1	3
hsa-miR-196b-5p	MIMAT0001080	ARSJ	79642	NM_024590	1	1	1	3
hsa-miR-196b-5p	MIMAT0001080	ATF6	22926	NM_007348	1	1	1	3
hsa-miR-196b-5p	MIMAT0001080	ATP6V1A	523	NM_001690	1	1	1	3
hsa-miR-196b-5p	MIMAT0001080	ATRNL1	26033	NM_207303	1	1	1	3
hsa-miR-196b-5p	MIMAT0001080	AUH	549	NM_001698	1	1	1	3
hsa-miR-196b-5p	MIMAT0001080	BCDIN3D	144233	NM_181708	1	1	1	3
hsa-miR-196b-5p	MIMAT0001080	BIRC6	57448	NM_016252	1	1	1	3
hsa-miR-196b-5p	MIMAT0001080	CASK	8573	NM_003688	1	1	1	3
hsa-miR-196b-5p	MIMAT0001080	CCDC47	57003	NM_020198	1	1	1	3
hsa-miR-196b-5p	MIMAT0001080	CD24	100133941	NM_013230	1	1	1	3
hsa-miR-196b-5p	MIMAT0001080	CDC14A	8556	NM_033313	1	1	1	3
hsa-miR-196b-5p	MIMAT0001080	CEP350	9857	NM_014810	1	1	1	3
hsa-miR-196b-5p	MIMAT0001080	CLEC2B	9976	NM_005127	1	1	1	3
hsa-miR-196b-5p	MIMAT0001080	CNOT7	29883	NM_054026	1	1	1	3
hsa-miR-196b-5p	MIMAT0001080	COL1A2	1278	NM_000089	1	1	1	3
hsa-miR-196b-5p	MIMAT0001080	CTBS	1486	NM_004388	1	1	1	3
hsa-miR-196b-5p	MIMAT0001080	DCDC2	51473	NM_001195610	1	1	1	3
hsa-miR-196b-5p	MIMAT0001080	DCP2	167227	NM_001242377	1	1	1	3
hsa-miR-196b-5p	MIMAT0001080	DDHD1	80821	NM_001160147	1	1	1	3
hsa-miR-196b-5p	MIMAT0001080	DIP2A	23181	NM_015151	1	1	1	3
hsa-miR-196b-5p	MIMAT0001080	DPY19L4	286148	NM_181787	1	1	1	3
hsa-miR-196b-5p	MIMAT0001080	EDNRB	1910	NM_001122659	1	1	1	3
hsa-miR-196b-5p	MIMAT0001080	ELMOD2	255520	NM_153702	1	1	1	3
hsa-miR-196b-5p	MIMAT0001080	ENTPD4	9583	NM_004901	1	1	1	3
hsa-miR-196b-5p	MIMAT0001080	EPS15	2060	NM_001981	1	1	1	3
hsa-miR-196b-5p	MIMAT0001080	ERG	2078	NM_001243429	1	1	1	3
hsa-miR-196b-5p	MIMAT0001080	ERI2	112479	NM_001142725	1	1	1	3
hsa-miR-196b-5p	MIMAT0001080	EXOC5	10640	NM_006544	1	1	1	3
hsa-miR-196b-5p	MIMAT0001080	EXOC8	149371	NM_175876	1	1	1	3
hsa-miR-196b-5p	MIMAT0001080	FAM19A5	25817	NM_001082967	1	1	1	3
hsa-miR-196b-5p	MIMAT0001080	FCRL4	83417	NM_031282	1	1	1	3
hsa-miR-196b-5p	MIMAT0001080	FGD6	55785	NM_018351	1	1	1	3
hsa-miR-196b-5p	MIMAT0001080	FZD3	7976	NM_017412	1	1	1	3
hsa-miR-196b-5p	MIMAT0001080	GAN	8139	NM_022041	1	1	1	3
hsa-miR-196b-5p	MIMAT0001080	GATA6	2627	NM_005257	1	1	1	3
hsa-miR-196b-5p	MIMAT0001080	GCFC2	6936	NM_001201334	1	1	1	3
hsa-miR-196b-5p	MIMAT0001080	HDAC9	9734	NM_001204144	1	1	1	3
hsa-miR-196b-5p	MIMAT0001080	HMGA2	8091	NM_003483	1	1	1	3
hsa-miR-196b-5p	MIMAT0001080	HOXA5	3202	NM_019102	1	1	1	3
hsa-miR-196b-5p	MIMAT0001080	HOXA7	3204	NM_006896	1	1	1	3
hsa-miR-196b-5p	MIMAT0001080	HOXA9	3205	NM_152739	1	1	1	3
hsa-miR-196b-5p	MIMAT0001080	HOXB6	3216	NM_018952	1	1	1	3
hsa-miR-196b-5p	MIMAT0001080	HOXB7	3217	NM_004502	1	1	1	3
hsa-miR-196b-5p	MIMAT0001080	HOXC8	3224	NM_022658	1	1	1	3
hsa-miR-196b-5p	MIMAT0001080	IFT57	55081	NM_018010	1	1	1	3
hsa-miR-196b-5p	MIMAT0001080	ITPRIPL2	162073	NM_001034841	1	1	1	3
hsa-miR-196b-5p	MIMAT0001080	KCNJ2	3759	NM_000891	1	1	1	3
hsa-miR-196b-5p	MIMAT0001080	KLHL23	151230	NM_144711	1	1	1	3
hsa-miR-196b-5p	MIMAT0001080	KLHL4	56062	NM_019117	1	1	1	3
hsa-miR-196b-5p	MIMAT0001080	LAMA4	3910	NM_001105207	1	1	1	3
hsa-miR-196b-5p	MIMAT0001080	LARP4	113251	NM_199190	1	1	1	3
hsa-miR-196b-5p	MIMAT0001080	LCOR	84458	NM_032440	1	1	1	3
hsa-miR-196b-5p	MIMAT0001080	LDOC1	23641	NM_012317	1	1	1	3
hsa-miR-196b-5p	MIMAT0001080	LGALS8	3964	NM_201545	1	1	1	3
hsa-miR-196b-5p	MIMAT0001080	LHFPL2	10184	NM_005779	1	1	1	3
hsa-miR-196b-5p	MIMAT0001080	LONP2	83752	NM_031490	1	1	1	3
hsa-miR-196b-5p	MIMAT0001080	LRP1B	53353	NM_018557	1	1	1	3
hsa-miR-196b-5p	MIMAT0001080	LSAMP	4045	NM_002338	1	1	1	3
hsa-miR-196b-5p	MIMAT0001080	MAP3K1	4214	NM_005921	1	1	1	3
hsa-miR-196b-5p	MIMAT0001080	MAPK9	5601	NM_001135044	1	1	1	3
hsa-miR-196b-5p	MIMAT0001080	MARCHF7	64844	NM_022826	1	1	1	3
hsa-miR-196b-5p	MIMAT0001080	MCM9	254394	NM_153255	1	1	1	3
hsa-miR-196b-5p	MIMAT0001080	MRC1	4360	NM_002438	1	1	1	3
hsa-miR-196b-5p	MIMAT0001080	MRPS7	51081	NM_015971	1	1	1	3
hsa-miR-196b-5p	MIMAT0001080	MTRNR2L4	100463285	NM_001190476	1	1	1	3
hsa-miR-196b-5p	MIMAT0001080	NAALADL2	254827	NM_207015	1	1	1	3
hsa-miR-196b-5p	MIMAT0001080	NDUFAF4	29078	NM_014165	1	1	1	3
hsa-miR-196b-5p	MIMAT0001080	NEDD4L	23327	NM_001144969	1	1	1	3
hsa-miR-196b-5p	MIMAT0001080	NME9	347736	NM_178130	1	1	1	3
hsa-miR-196b-5p	MIMAT0001080	NR2C2	7182	NM_003298	1	1	1	3
hsa-miR-196b-5p	MIMAT0001080	NRAS	4893	NM_002524	1	1	1	3
hsa-miR-196b-5p	MIMAT0001080	P2RY1	5028	NM_002563	1	1	1	3
hsa-miR-196b-5p	MIMAT0001080	PACRGL	133015	NM_145048	1	1	1	3
hsa-miR-196b-5p	MIMAT0001080	PAPOLA	10914	NM_001252007	1	1	1	3
hsa-miR-196b-5p	MIMAT0001080	PAPOLG	64895	NM_022894	1	1	1	3
hsa-miR-196b-5p	MIMAT0001080	PARD3B	117583	NM_152526	1	1	1	3
hsa-miR-196b-5p	MIMAT0001080	PBX1	5087	NM_002585	1	1	1	3
hsa-miR-196b-5p	MIMAT0001080	PBX3	5090	NM_006195	1	1	1	3
hsa-miR-196b-5p	MIMAT0001080	PDE7B	27115	NM_018945	1	1	1	3
hsa-miR-196b-5p	MIMAT0001080	PHOSPHO2-KLHL23	100526832	NM_001199290	1	1	1	3
hsa-miR-196b-5p	MIMAT0001080	PLCXD1	55344	NM_018390	1	1	1	3
hsa-miR-196b-5p	MIMAT0001080	PLD1	5337	NM_001130081	1	1	1	3
hsa-miR-196b-5p	MIMAT0001080	PLN	5350	NM_002667	1	1	1	3
hsa-miR-196b-5p	MIMAT0001080	POLR3D	661	NM_001722	1	1	1	3
hsa-miR-196b-5p	MIMAT0001080	PPP1R15B	84919	NM_032833	1	1	1	3
hsa-miR-196b-5p	MIMAT0001080	PPP6R2	9701	NM_001242899	1	1	1	3
hsa-miR-196b-5p	MIMAT0001080	PRELID2	153768	NM_182960	1	1	1	3
hsa-miR-196b-5p	MIMAT0001080	PRKG1	5592	NM_001098512	1	1	1	3
hsa-miR-196b-5p	MIMAT0001080	PRTG	283659	NM_173814	1	1	1	3
hsa-miR-196b-5p	MIMAT0001080	PTGER3	5733	NM_198715	1	1	1	3
hsa-miR-196b-5p	MIMAT0001080	PTPRG	5793	NM_002841	1	1	1	3
hsa-miR-196b-5p	MIMAT0001080	RASSF3	283349	NM_178169	1	1	1	3
hsa-miR-196b-5p	MIMAT0001080	RAVER2	55225	NM_018211	1	1	1	3
hsa-miR-196b-5p	MIMAT0001080	RBM12B	389677	NM_203390	1	1	1	3
hsa-miR-196b-5p	MIMAT0001080	RBM26	64062	NM_022118	1	1	1	3
hsa-miR-196b-5p	MIMAT0001080	RDH11	51109	NM_016026	1	1	1	3
hsa-miR-196b-5p	MIMAT0001080	RGL2	5863	NM_004761	1	1	1	3
hsa-miR-196b-5p	MIMAT0001080	RNF10	9921	NM_014868	1	1	1	3
hsa-miR-196b-5p	MIMAT0001080	ROCK1	6093	NM_005406	1	1	1	3
hsa-miR-196b-5p	MIMAT0001080	RPL35A	6165	NM_000996	1	1	1	3
hsa-miR-196b-5p	MIMAT0001080	RPL36A	6173	NM_001199972	1	1	1	3
hsa-miR-196b-5p	MIMAT0001080	RTKN2	219790	NM_145307	1	1	1	3
hsa-miR-196b-5p	MIMAT0001080	SCCPDH	51097	NM_016002	1	1	1	3
hsa-miR-196b-5p	MIMAT0001080	SDCBP	6386	NM_001007067	1	1	1	3
hsa-miR-196b-5p	MIMAT0001080	SLC9A2	6549	NM_003048	1	1	1	3
hsa-miR-196b-5p	MIMAT0001080	SLC9A6	10479	NM_001042537	1	1	1	3
hsa-miR-196b-5p	MIMAT0001080	SMC3	9126	NM_005445	1	1	1	3
hsa-miR-196b-5p	MIMAT0001080	SNX16	64089	NM_152836	1	1	1	3
hsa-miR-196b-5p	MIMAT0001080	SNX24	28966	NM_014035	1	1	1	3
hsa-miR-196b-5p	MIMAT0001080	SORCS1	114815	NM_001206572	1	1	1	3
hsa-miR-196b-5p	MIMAT0001080	SPRED1	161742	NM_152594	1	1	1	3
hsa-miR-196b-5p	MIMAT0001080	SRP9	6726	NM_003133	1	1	1	3
hsa-miR-196b-5p	MIMAT0001080	SULT2A1	6822	NM_003167	1	1	1	3
hsa-miR-196b-5p	MIMAT0001080	THSD7A	221981	NM_015204	1	1	1	3
hsa-miR-196b-5p	MIMAT0001080	TKTL2	84076	NM_032136	1	1	1	3
hsa-miR-196b-5p	MIMAT0001080	TMEM245	23731	NM_032012	1	1	1	3
hsa-miR-196b-5p	MIMAT0001080	TMX1	81542	NM_030755	1	1	1	3
hsa-miR-196b-5p	MIMAT0001080	TRERF1	55809	NM_033502	1	1	1	3
hsa-miR-196b-5p	MIMAT0001080	TRMT10A	93587	NM_152292	1	1	1	3
hsa-miR-196b-5p	MIMAT0001080	TRMT1L	81627	NM_001202423	1	1	1	3
hsa-miR-196b-5p	MIMAT0001080	TRPC3	7222	NM_003305	1	1	1	3
hsa-miR-196b-5p	MIMAT0001080	TSPAN12	23554	NM_012338	1	1	1	3
hsa-miR-196b-5p	MIMAT0001080	TSTD3	100130890	NM_001195131	1	1	1	3
hsa-miR-196b-5p	MIMAT0001080	TUB	7275	NM_177972	1	1	1	3
hsa-miR-196b-5p	MIMAT0001080	TYRP1	7306	NM_000550	1	1	1	3
hsa-miR-196b-5p	MIMAT0001080	UGT2A1	10941	NM_006798	1	1	1	3
hsa-miR-196b-5p	MIMAT0001080	UGT2A2	574537	NM_001105677	1	1	1	3
hsa-miR-196b-5p	MIMAT0001080	VPS33A	65082	NM_022916	1	1	1	3
hsa-miR-196b-5p	MIMAT0001080	VSNL1	7447	NM_003385	1	1	1	3
hsa-miR-196b-5p	MIMAT0001080	XAF1	54739	NM_017523	1	1	1	3
hsa-miR-196b-5p	MIMAT0001080	ZMYND11	10771	NM_001202466	1	1	1	3
hsa-miR-196b-5p	MIMAT0001080	ZNF24	7572	NM_006965	1	1	1	3
hsa-miR-196b-5p	MIMAT0001080	ZNF280D	54816	NM_001002844	1	1	1	3
hsa-miR-196b-5p	MIMAT0001080	ZNF670	93474	NM_001204220	1	1	1	3
hsa-miR-1972	MIMAT0009447	ABCB5	340273	NM_001163942	1	1	1	3
hsa-miR-1972	MIMAT0009447	ACVR1	90	NM_001105	1	1	1	3
hsa-miR-1972	MIMAT0009447	ACYP1	97	NM_203488	1	1	1	3
hsa-miR-1972	MIMAT0009447	ADAMTS5	11096	NM_007038	1	1	1	3
hsa-miR-1972	MIMAT0009447	AKR1B15	441282	NM_001080538	1	1	1	3
hsa-miR-1972	MIMAT0009447	ALPK3	57538	NM_020778	1	1	1	3
hsa-miR-1972	MIMAT0009447	ALX4	60529	NM_021926	1	1	1	3
hsa-miR-1972	MIMAT0009447	AMER1	139285	NM_152424	1	1	1	3
hsa-miR-1972	MIMAT0009447	ARMC5	79798	NM_024742	1	1	1	3
hsa-miR-1972	MIMAT0009447	ARMC8	25852	NM_015396	1	1	1	3
hsa-miR-1972	MIMAT0009447	ASIC1	41	NM_020039	1	1	1	3
hsa-miR-1972	MIMAT0009447	ATAD3C	219293	NM_001039211	1	1	1	3
hsa-miR-1972	MIMAT0009447	BACH1	571	NM_206866	1	1	1	3
hsa-miR-1972	MIMAT0009447	BCR	613	NM_021574	1	1	1	3
[truncated: 16,794 more rows]
