# Supplementary material for: Expression profile, molecular functions, and prognostic significance of miRNAs in primary colorectal cancer stem cells
Source: Aging (Albany NY). 2021 Apr 1;13(8):12067–85. doi: 10.18632/aging.202914 (PMC8109135; doi:10.18632/aging.202914)
Supplement: Supplementary Table 3 [file aging-13-202914-s004.xlsx]

## Sheet: Table S3_diff_mirna_TCGA
Supplementary Table 3. Differentially expressed miRNAs between normal and cancer tissues in patients from CRC from the TCGA dataset.
miRNA	logFC	AveExpr	t	P.Value	adj.P.Val	B
hsa-miR-766-3p	-4.07038	2.74411	-15.6587	2.31e-45	2.67e-43	92.3344
hsa-miR-671-3p	-3.56871	1.79707	-15.0827	9.94e-43	8.93e-41	86.3129
hsa-miR-99b-5p	-3.19149	13.6669	-13.0194	1.24e-33	3.6e-32	65.5236
hsa-miR-4728-3p	-2.92337	0.82824	-11.0254	1.75e-25	2.5e-24	46.9332
hsa-miR-3940-3p	-2.87615	0.542324	-15.6813	1.82e-45	2.26e-43	92.5719
hsa-miR-484	-2.64533	5.64288	-10.5133	1.61e-23	1.99e-22	42.4543
hsa-miR-483-3p	-2.56383	1.90372	-2.91943	0.00366281	0.0095742	-3.23392
hsa-miR-3614-5p	-1.92317	1.72356	-6.46439	2.39e-10	1.2e-09	12.5939
hsa-miR-5010-3p	-1.84154	0.691153	-10.2563	1.49e-22	1.75e-21	40.2587
hsa-miR-338-5p	-1.73372	2.48565	-4.9457	1.03e-06	3.91e-06	4.47299
hsa-miR-664b-3p	-1.6608	1.62002	-6.93189	1.27e-11	6.89e-11	15.4657
hsa-miR-1227-3p	-1.48874	0.177802	-14.2162	7.71e-39	3.78e-37	77.4217
hsa-miR-664a-3p	-1.34347	3.74753	-5.49733	6.12e-08	2.54e-07	7.20185
hsa-miR-3620-3p	-1.15458	0.0952698	-14.0521	4.1e-38	1.75e-36	75.7626
hsa-miR-345-5p	-0.960412	4.06679	-2.85875	0.00442837	0.0113913	-3.40615
hsa-miR-4640-3p	-0.681228	0.105023	-8.54005	1.58e-16	1.15e-15	26.5625
hsa-miR-18b-3p	-0.530956	0.0487451	-8.74156	3.39e-17	2.66e-16	28.0774
hsa-miR-4646-3p	-0.529637	0.0429284	-10.0295	1.02e-21	1.13e-20	38.3498
hsa-miR-636	-0.426199	0.219109	-3.8482	0.000134188	0.000411204	-0.166089
hsa-miR-3190-5p	-0.412404	0.118596	-4.84291	1.7e-06	6.32e-06	3.99334
hsa-miR-4769-3p	-0.152275	0.0139305	-4.60595	5.2e-06	1.85e-05	2.92264
hsa-miR-4488	-0.140683	0.0563715	-2.07072	0.0388905	0.0859628	-5.32223
hsa-miR-3613-3p	0.62629	0.663011	3.31023	0.000998591	0.00277615	-2.04123
hsa-miR-200c-5p	0.769643	5.82527	2.21938	0.0269032	0.0614821	-5.00666
hsa-miR-3682-3p	1.05622	0.865988	5.21754	2.65e-07	1.05e-06	5.78543
hsa-miR-584-5p	1.10176	7.94331	2.66497	0.00794498	0.0199558	-3.93266
hsa-miR-494-3p	1.25549	1.22572	5.46163	7.4e-08	3.03e-07	7.01747
hsa-miR-196b-5p	1.33719	11.1054	2.65382	0.00820872	0.0205281	-3.96188
hsa-miR-671-5p	1.60196	2.06229	6.25355	8.53e-10	4.12e-09	11.3542
hsa-miR-223-3p	1.91021	7.90674	4.43966	1.11e-05	3.79e-05	2.20078
hsa-miR-338-3p	1.96583	8.39758	4.41224	1.25e-05	4.27e-05	2.08412
hsa-miR-183-5p	2.21513	12.7464	6.60363	1.02e-10	5.23e-10	13.4316
hsa-miR-598-3p	2.47629	3.59292	6.78312	3.29e-11	1.74e-10	14.5337
hsa-miR-182-5p	3.8511	13.6972	11.5873	1.05e-27	1.77e-26	51.9954
hsa-miR-142-3p	4.59204	10.8033	13.3129	6.88e-35	2.37e-33	68.3958
hsa-miR-486-5p	-5.08785	5.72228	-11.7382	2.6e-28	4.68e-27	53.3794
hsa-miR-328	-5.00229	3.91951	-16.496	3e-49	6.08e-47	101.221
hsa-miR-139-5p	-4.68026	4.4107	-15.1252	6.37e-43	6.06e-41	86.7549
hsa-miR-139-3p	-4.64123	2.36949	-14.4757	5.39e-40	3.75e-38	80.062
hsa-miR-642a-5p	-4.54124	1.9477	-13.7279	1.09e-36	4.19e-35	72.509
hsa-miR-129-5p	-4.46647	1.5699	-12.7429	1.85e-32	4.6e-31	62.8473
hsa-miR-197-3p	-4.38675	7.91009	-14.932	4.79e-42	4.08e-40	84.7516
hsa-miR-149-5p	-4.37529	3.43092	-11.9201	4.76e-29	9.28e-28	55.0619
hsa-let-7d-3p	-4.13733	8.50495	-16.136	1.43e-47	2.32e-45	97.3819
hsa-miR-133a	-4.09711	3.91075	-8.23861	1.5e-15	1.03e-14	24.346
hsa-miR-1306-5p	-4.02148	2.70111	-14.3056	3.09e-39	1.67e-37	78.3293
hsa-miR-194-3p	-3.93635	7.68062	-11.2396	2.53e-26	3.83e-25	48.8449
hsa-miR-1224-5p	-3.88103	0.725688	-11.3462	9.61e-27	1.52e-25	49.8043
hsa-miR-150-5p	-3.87759	8.31951	-9.38028	2.19e-19	1.96e-18	33.0481
hsa-miR-504	-3.83905	0.543679	-16.9586	2.02e-51	5.35e-49	106.191
hsa-miR-125a-5p	-3.79546	7.85429	-14.331	2.38e-39	1.38e-37	78.5874
hsa-miR-145-5p	-3.77637	11.0173	-10.404	4.17e-23	5.03e-22	41.5164
hsa-miR-296-5p	-3.69637	1.85448	-9.19362	9.82e-19	8.5e-18	31.5695
hsa-miR-1976	-3.66312	3.04728	-15.1446	5.2e-43	5.26e-41	86.9567
hsa-miR-378a-5p	-3.64169	6.78629	-12.1807	4.08e-30	8.92e-29	57.4977
hsa-miR-574-3p	-3.53206	5.69473	-12.3238	1.05e-30	2.42e-29	58.8465
hsa-miR-490-3p	-3.46371	1.19298	-6.74475	4.19e-11	2.2e-10	14.296
hsa-miR-1180	-3.43227	3.33303	-11.0426	1.5e-25	2.16e-24	47.0858
hsa-miR-205-5p	-3.42559	1.03357	-5.70801	1.95e-08	8.32e-08	8.31165
hsa-miR-193b-5p	-3.4129	1.76969	-12.9313	2.95e-33	7.96e-32	64.6672
hsa-miR-150-3p	-3.35967	1.36102	-11.1447	5.97e-26	8.79e-25	47.9953
hsa-miR-375	-3.32842	14.287	-7.08346	4.73e-12	2.62e-11	16.4324
hsa-miR-92b-3p	-3.30543	5.85891	-10.5554	1.12e-23	1.42e-22	42.8175
hsa-miR-1296	-3.27348	2.40155	-10.8793	6.44e-25	8.68e-24	45.6417
hsa-miR-532-3p	-3.27304	5.43364	-9.93851	2.2e-21	2.35e-20	37.5926
hsa-miR-744-5p	-3.25181	4.11789	-11.9682	3.03e-29	6.13e-28	55.509
hsa-miR-193a-5p	-3.22166	6.87774	-11.9907	2.45e-29	5.09e-28	55.7186
hsa-let-7b-5p	-3.19417	13.158	-14.5513	2.48e-40	1.91e-38	80.835
hsa-miR-146b-3p	-3.18602	5.60033	-11.4498	3.73e-27	6.09e-26	50.7429
hsa-miR-3127-5p	-3.17075	2.78695	-10.1348	4.19e-22	4.81e-21	39.2326
hsa-miR-1226-3p	-3.16072	1.00996	-13.1596	3.13e-34	1.01e-32	66.892
hsa-miR-195-3p	-3.14915	1.32445	-13.8003	5.25e-37	2.07e-35	73.2323
hsa-miR-3605-3p	-3.12439	1.70661	-13.9434	1.24e-37	5e-36	74.6678
hsa-miR-3150b-3p	-3.11625	1.6972	-8.01044	7.9e-15	5.2e-14	22.7088
hsa-miR-629-3p	-3.10618	2.91327	-10.5287	1.41e-23	1.77e-22	42.5874
hsa-miR-326	-3.06244	2.14775	-9.92087	2.56e-21	2.7e-20	37.4462
hsa-miR-423-3p	-3.04624	6.49944	-11.6194	7.82e-28	1.35e-26	52.2889
hsa-miR-3615	-3.02193	2.24141	-10.525	1.46e-23	1.81e-22	42.5555
hsa-miR-1307-3p	-3.01507	9.86326	-9.38518	2.11e-19	1.9e-18	33.0872
hsa-miR-23a-5p	-3.01383	2.09195	-8.68475	5.24e-17	4.04e-16	27.6477
hsa-miR-181a-5p	-2.9913	9.40185	-11.5114	2.12e-27	3.5e-26	51.3027
hsa-let-7e-3p	-2.93255	2.80302	-10.2198	2.03e-22	2.36e-21	39.9495
hsa-miR-485-3p	-2.91679	1.8062	-10.5343	1.34e-23	1.7e-22	42.6361
hsa-miR-193b-3p	-2.90301	4.90558	-9.05794	2.88e-18	2.47e-17	30.508
hsa-miR-324-3p	-2.90179	3.74476	-11.6549	5.64e-28	9.81e-27	52.6136
hsa-miR-342-5p	-2.83464	1.95133	-10.8148	1.14e-24	1.5e-23	45.0748
hsa-miR-125b-5p	-2.79978	7.63058	-7.63488	1.13e-13	6.92e-13	20.0921
hsa-miR-3917	-2.79741	1.24135	-10.9738	2.77e-25	3.87e-24	46.4759
hsa-miR-331-3p	-2.76602	4.2117	-9.72829	1.27e-20	1.25e-19	35.86
hsa-let-7b-3p	-2.74984	4.40492	-12.1779	4.19e-30	9.04e-29	57.4712
hsa-miR-1249	-2.73441	1.13517	-12.2451	2.21e-30	4.97e-29	58.1033
hsa-miR-99b-3p	-2.71245	4.77401	-9.41456	1.66e-19	1.52e-18	33.3219
hsa-miR-874	-2.71114	4.04837	-8.03674	6.54e-15	4.33e-14	22.8957
hsa-miR-378a-3p	-2.69715	9.60736	-9.78244	8.12e-21	8.21e-20	36.3039
hsa-let-7c	-2.69399	8.51219	-6.54637	1.45e-10	7.41e-10	13.0853
hsa-miR-1247-5p	-2.68633	4.67903	-4.2739	2.3e-05	7.69e-05	1.50568
hsa-miR-433	-2.67555	1.09361	-12.2205	2.8e-30	6.2e-29	57.8713
hsa-let-7i-3p	-2.66996	5.64709	-9.36617	2.46e-19	2.17e-18	32.9355
hsa-miR-605	-2.65022	0.601634	-14.3926	1.27e-39	7.79e-38	79.2147
hsa-miR-15b-5p	-2.61642	7.36042	-9.37877	2.22e-19	1.98e-18	33.036
hsa-miR-370	-2.57845	2.5751	-10.0156	1.15e-21	1.24e-20	38.2345
hsa-miR-3074-5p	-2.56398	2.81105	-8.72806	3.76e-17	2.92e-16	27.9751
hsa-miR-30c-2-3p	-2.55919	2.98703	-10.4308	3.3e-23	4.05e-22	41.7462
hsa-miR-187-3p	-2.55792	0.831439	-7.22182	1.89e-12	1.08e-11	17.3299
hsa-miR-191-3p	-2.54936	2.56861	-8.15851	2.69e-15	1.82e-14	23.7673
hsa-miR-339-5p	-2.5485	4.77309	-6.93175	1.27e-11	6.89e-11	15.4648
hsa-miR-3173-5p	-2.53794	0.601875	-13.9835	8.23e-38	3.42e-36	75.0713
hsa-miR-3940-5p	-2.51226	1.09075	-9.45763	1.17e-19	1.08e-18	33.6669
hsa-miR-2110	-2.49524	1.26328	-9.90484	2.92e-21	3.07e-20	37.3134
hsa-miR-3928	-2.49268	1.25293	-10.8085	1.21e-24	1.57e-23	45.0199
hsa-miR-1468	-2.49047	2.33123	-9.04372	3.22e-18	2.74e-17	30.3974
hsa-miR-361-3p	-2.48088	6.31301	-11.7095	3.4e-28	5.97e-27	53.1153
hsa-miR-29b-2-5p	-2.47144	3.74591	-11.185	4.15e-26	6.16e-25	48.3556
hsa-miR-767-5p	-2.43857	1.13102	-3.87805	0.000119166	0.000367258	-0.0542339
hsa-miR-589-5p	-2.4256	5.66307	-11.1879	4.04e-26	6.06e-25	48.3819
hsa-miR-23b-5p	-2.36277	0.950745	-11.2809	1.74e-26	2.66e-25	49.2158
hsa-miR-490-5p	-2.36186	0.282445	-10.9581	3.19e-25	4.41e-24	46.337
hsa-miR-937	-2.33128	1.68137	-7.16113	2.83e-12	1.6e-11	16.9345
hsa-miR-760	-2.2782	0.76978	-9.36517	2.48e-19	2.18e-18	32.9275
hsa-miR-3622a-3p	-2.26457	0.120414	-18.5649	4.44e-59	2.39e-56	123.71
hsa-miR-3653	-2.25944	2.94415	-6.71568	5.04e-11	2.62e-10	14.1167
hsa-miR-1343	-2.24921	0.570915	-12.7634	1.52e-32	3.83e-31	63.0446
hsa-miR-4676-5p	-2.2335	0.725012	-12.0616	1.26e-29	2.64e-28	56.3807
hsa-miR-133b	-2.22141	1.77478	-4.91682	1.19e-06	4.47e-06	4.33732
hsa-miR-432-5p	-2.20547	2.5692	-8.74889	3.2e-17	2.54e-16	28.133
hsa-miR-431-3p	-2.15873	2.93944	-8.24125	1.47e-15	1.01e-14	24.3652
hsa-miR-455-3p	-2.14811	7.49663	-6.12808	1.79e-09	8.31e-09	10.6332
hsa-miR-885-5p	-2.12579	0.162991	-18.0626	1.14e-56	4.63e-54	118.193
hsa-miR-92a-3p	-2.08902	14.0878	-7.40921	5.35e-13	3.16e-12	18.5677
hsa-miR-2116-3p	-2.08735	0.573431	-13.0062	1.42e-33	4.02e-32	65.3956
hsa-miR-125b-2-3p	-2.06691	1.99792	-5.83773	9.46e-09	4.1e-08	9.0132
hsa-miR-1271-5p	-2.06361	1.62354	-8.61195	9.13e-17	6.87e-16	27.1001
hsa-miR-323a-3p	-2.05894	2.09471	-7.5352	2.26e-13	1.36e-12	19.4142
hsa-miR-1306-3p	-2.04804	0.952999	-10.0622	7.76e-22	8.6e-21	38.624
hsa-miR-615-3p	-2.04491	0.780222	-5.62469	3.08e-08	1.3e-07	7.86835
hsa-miR-501-3p	-2.04032	5.57201	-5.87306	7.75e-09	3.39e-08	9.20672
hsa-miR-1228-5p	-1.98399	0.481379	-12.561	1.07e-31	2.56e-30	61.1022
hsa-miR-4732-3p	-1.95591	0.245072	-12.8737	5.18e-33	1.35e-31	64.1095
hsa-miR-4326	-1.94809	2.46048	-4.26343	2.4e-05	8e-05	1.46263
hsa-miR-675-3p	-1.9393	3.80981	-2.9385	0.00344833	0.00905746	-3.17905
hsa-miR-342-3p	-1.93794	5.9121	-6.32315	5.63e-10	2.77e-09	11.7595
hsa-miR-214-3p	-1.9269	2.58882	-5.71344	1.89e-08	8.09e-08	8.34073
hsa-miR-130b-5p	-1.92225	4.12925	-7.33705	8.73e-13	5.04e-12	18.088
hsa-miR-505-3p	-1.91769	5.45801	-7.58688	1.58e-13	9.58e-13	19.7648
hsa-miR-505-5p	-1.89525	2.9063	-7.19048	2.33e-12	1.32e-11	17.1253
hsa-miR-891a	-1.89191	0.938111	-6.01384	3.47e-09	1.56e-08	9.98768
hsa-miR-127-3p	-1.88272	8.95057	-7.09105	4.5e-12	2.5e-11	16.4813
hsa-miR-1266	-1.86846	3.67424	-4.76198	2.51e-06	9.15e-06	3.62212
hsa-miR-125a-3p	-1.86712	1.60167	-6.80275	2.9e-11	1.54e-10	14.6557
hsa-miR-365a-5p	-1.86684	0.461789	-11.8864	6.53e-29	1.24e-27	54.749
hsa-miR-324-5p	-1.86556	4.03944	-6.45404	2.55e-10	1.28e-09	12.5322
hsa-miR-1538	-1.86331	0.231199	-15.7982	5.26e-46	7.09e-44	93.8043
hsa-miR-363-3p	-1.85813	1.80951	-5.03586	6.62e-07	2.53e-06	4.90126
hsa-miR-105-5p	-1.85317	1.50859	-2.49346	0.0129683	0.0315057	-4.3687
hsa-miR-652-3p	-1.85058	4.75279	-7.35656	7.65e-13	4.44e-12	18.2173
hsa-miR-486-3p	-1.8201	0.546818	-9.04076	3.3e-18	2.79e-17	30.3744
hsa-miR-3127-3p	-1.81852	0.332213	-13.4717	1.42e-35	5.09e-34	69.9633
hsa-miR-423-5p	-1.81746	5.34359	-6.73791	4.38e-11	2.29e-10	14.2537
hsa-miR-1229	-1.80288	0.553267	-9.52411	6.82e-20	6.38e-19	34.2016
hsa-miR-3609	-1.78358	0.50135	-8.50498	2.05e-16	1.48e-15	26.3016
hsa-miR-654-5p	-1.78009	1.19316	-8.22535	1.65e-15	1.13e-14	24.25
hsa-miR-129-2-3p	-1.77083	0.297563	-11.7363	2.65e-28	4.71e-27	53.3621
hsa-miR-219-1-3p	-1.76509	1.77863	-6.87964	1.78e-11	9.55e-11	15.1364
hsa-miR-330-3p	-1.75521	1.82978	-7.74503	5.24e-14	3.24e-13	20.8493
hsa-miR-5187-5p	-1.73101	0.376865	-13.3533	4.61e-35	1.62e-33	68.7936
hsa-miR-3652	-1.71092	0.360399	-11.9623	3.21e-29	6.33e-28	55.4539
hsa-miR-132-3p	-1.69899	6.19839	-8.41117	4.16e-16	2.92e-15	25.6075
hsa-miR-377-5p	-1.68677	1.22862	-6.53199	1.58e-10	8.02e-10	12.9987
hsa-miR-3130-3p	-1.6745	0.383205	-11.9644	3.14e-29	6.28e-28	55.4735
hsa-miR-140-3p	-1.66984	9.16302	-10.8204	1.09e-24	1.44e-23	45.1244
hsa-miR-320a	-1.66641	8.51082	-5.08141	5.28e-07	2.04e-06	5.12026
hsa-miR-200c-3p	-1.66568	13.418	-6.08923	2.24e-09	1.04e-08	10.4125
hsa-miR-323b-3p	-1.66375	2.50926	-5.41111	9.68e-08	3.93e-07	6.75832
hsa-miR-589-3p	-1.66349	1.72089	-6.22693	9.99e-10	4.77e-09	11.2002
hsa-miR-29c-5p	-1.65391	4.0276	-7.7979	3.61e-14	2.25e-13	21.2158
hsa-miR-409-3p	-1.61279	4.40053	-6.87347	1.85e-11	9.9e-11	15.0977
hsa-miR-4685-3p	-1.60016	0.287581	-12.5654	1.03e-31	2.53e-30	61.1439
hsa-miR-1301	-1.59926	2.5367	-5.87083	7.85e-09	3.42e-08	9.19444
hsa-miR-1228-3p	-1.59878	0.497264	-9.61686	3.19e-20	3.06e-19	34.9519
hsa-miR-106b-3p	-1.5877	8.0911	-6.05789	2.69e-09	1.24e-08	10.2353
hsa-miR-200b-5p	-1.56687	6.28471	-5.08699	5.13e-07	2e-06	5.14723
hsa-miR-3130-5p	-1.54949	2.66051	-3.92309	9.95e-05	0.000307746	0.11609
hsa-miR-4746-5p	-1.54387	1.8711	-5.68586	2.2e-08	9.3e-08	8.19326
hsa-miR-877-5p	-1.53191	1.43506	-5.08407	5.21e-07	2.02e-06	5.13312
hsa-miR-1287	-1.51682	3.76969	-6.28636	7.02e-10	3.41e-09	11.5448
hsa-miR-491-5p	-1.51283	1.25077	-6.7447	4.19e-11	2.2e-10	14.2957
hsa-miR-3944-3p	-1.5014	0.329399	-10.6618	4.4e-24	5.7e-23	43.7396
hsa-miR-3199	-1.49939	0.470409	-10.8232	1.06e-24	1.42e-23	45.1489
hsa-miR-425-3p	-1.47868	3.43897	-5.89815	6.72e-09	2.95e-08	9.34472
hsa-miR-204-5p	-1.47699	1.623	-2.90009	0.00389249	0.0101255	-3.28917
hsa-miR-935	-1.46489	2.3957	-2.83259	0.00480108	0.0123108	-3.4793
hsa-miR-30b-3p	-1.45655	1.70843	-5.93174	5.56e-09	2.46e-08	9.53025
hsa-miR-4532	-1.45341	0.300292	-8.53432	1.65e-16	1.19e-15	26.5198
hsa-miR-616-3p	-1.44714	1.1086	-6.15838	1.5e-09	7.02e-09	10.8061
hsa-miR-218-1-3p	-1.44245	0.308854	-10.9154	4.67e-25	6.35e-24	45.9601
hsa-miR-3200-3p	-1.44227	2.09006	-4.0503	5.92e-05	0.000189196	0.607108
hsa-miR-4632	-1.43893	0.161712	-14.5537	2.42e-40	1.91e-38	80.8594
hsa-miR-4787-3p	-1.43708	0.321364	-8.99838	4.6e-18	3.84e-17	30.0456
hsa-miR-625-3p	-1.42157	8.55705	-3.76936	0.000182929	0.000549128	-0.457591
hsa-miR-28-3p	-1.3974	12.2117	-9.54296	5.85e-20	5.5e-19	34.3536
hsa-miR-320c	-1.39202	0.764113	-7.40194	5.62e-13	3.31e-12	18.5192
hsa-miR-2277-3p	-1.3699	0.250754	-11.0191	1.85e-25	2.62e-24	46.8774
hsa-miR-365a-3p	-1.34126	4.57264	-4.75381	2.6e-06	9.45e-06	3.585
hsa-miR-501-5p	-1.32272	2.03557	-4.3217	1.86e-05	6.27e-05	1.70361
hsa-miR-3651	-1.31636	1.57175	-3.7858	0.00017156	0.000515956	-0.397279
hsa-miR-1254	-1.30506	0.724563	-6.54179	1.49e-10	7.6e-10	13.0577
hsa-miR-185-3p	-1.30246	2.18812	-5.04941	6.19e-07	2.37e-06	4.96623
hsa-miR-4521	-1.3004	0.389626	-8.55217	1.44e-16	1.05e-15	26.6529
hsa-miR-1270	-1.2947	0.564538	-6.8805	1.77e-11	9.52e-11	15.1419
hsa-miR-497-5p	-1.28885	3.49958	-4.76517	2.47e-06	9.04e-06	3.63668
hsa-miR-3690	-1.28716	0.468601	-7.9357	1.35e-14	8.69e-14	22.1803
hsa-miR-296-3p	-1.26654	0.868149	-4.15143	3.88e-05	0.00012644	1.00795
hsa-miR-30d-5p	-1.26405	12.2644	-5.70477	1.98e-08	8.44e-08	8.29434
hsa-miR-939	-1.2537	1.23061	-6.01292	3.49e-09	1.57e-08	9.98253
hsa-miR-346	-1.25361	0.116753	-12.9381	2.76e-33	7.57e-32	64.7338
hsa-miR-18a-3p	-1.24829	1.85778	-4.1622	3.7e-05	0.000121052	1.05119
hsa-miR-1181	-1.2254	0.279097	-9.48135	9.67e-20	8.99e-19	33.8573
hsa-miR-5001-5p	-1.22359	0.510977	-7.62313	1.23e-13	7.48e-13	20.0118
hsa-miR-4754	-1.18747	0.129035	-13.1261	4.36e-34	1.33e-32	66.5647
hsa-miR-378c	-1.18387	3.70598	-4.80369	2.05e-06	7.54e-06	3.81274
hsa-miR-4665-5p	-1.17691	0.274686	-8.93027	7.84e-18	6.44e-17	29.5196
hsa-miR-23b-3p	-1.16207	10.068	-6.05537	2.73e-09	1.25e-08	10.2211
hsa-miR-632	-1.15998	0.443276	-7.10049	4.23e-12	2.36e-11	16.5421
hsa-miR-4449	-1.15334	1.09839	-3.82645	0.000146241	0.000443937	-0.247075
hsa-miR-129-1-3p	-1.15259	0.100275	-12.9114	3.58e-33	9.5e-32	64.4748
hsa-miR-500a-3p	-1.13837	8.23294	-3.63671	0.000304386	0.000903663	-0.935171
hsa-miR-1292	-1.13615	0.636396	-6.29442	6.69e-10	3.26e-09	11.5918
hsa-miR-5091	-1.12555	0.658489	-6.23892	9.31e-10	4.48e-09	11.2695
hsa-miR-30a-3p	-1.12422	10.1024	-4.45317	1.04e-05	3.58e-05	2.25852
hsa-miR-92a-1-5p	-1.12395	2.8861	-3.54835	0.00042369	0.0012419	-1.24429
hsa-miR-365b-5p	-1.11353	0.383574	-7.05971	5.52e-12	3.05e-11	16.2798
hsa-miR-1275	-1.11333	0.670277	-4.41784	1.22e-05	4.17e-05	2.10789
hsa-miR-664b-5p	-1.11162	0.289588	-8.71639	4.11e-17	3.18e-16	27.8867
hsa-miR-20b-3p	-1.10708	0.430215	-5.32242	1.54e-07	6.15e-07	6.30864
hsa-miR-181b-5p	-1.10423	7.3256	-4.10418	4.73e-05	0.000153	0.819533
hsa-miR-1295a	-1.10091	0.279895	-8.5967	1.03e-16	7.68e-16	26.9858
hsa-miR-5698	-1.09209	0.508117	-5.94586	5.13e-09	2.27e-08	9.60856
hsa-miR-181a-2-3p	-1.08316	9.05069	-4.14154	4.04e-05	0.000131566	0.968338
hsa-miR-320b	-1.07536	2.66328	-3.13474	0.0018198	0.00494873	-2.59461
hsa-miR-940	-1.05833	1.93381	-3.36834	0.000813784	0.00229391	-1.85163
hsa-miR-191-5p	-1.02969	9.44623	-3.94473	9.11e-05	0.000283616	0.198589
hsa-miR-4772-3p	-0.99912	2.72002	-3.01317	0.0027147	0.00723621	-2.96098
hsa-miR-4638-3p	-0.998874	0.782937	-5.13273	4.08e-07	1.59e-06	5.36916
hsa-let-7a-5p	-0.995009	14.1623	-6.27043	7.72e-10	3.74e-09	11.4522
hsa-miR-197-5p	-0.984185	0.102788	-14.0748	3.26e-38	1.43e-36	75.991
hsa-miR-149-3p	-0.981488	0.0840678	-12.163	4.82e-30	1.03e-28	57.3309
hsa-miR-887	-0.979714	1.48806	-4.06317	5.61e-05	0.000180439	0.657606
hsa-miR-769-3p	-0.973934	1.11526	-4.1098	4.62e-05	0.000149742	0.841827
hsa-miR-639	-0.952265	0.72322	-4.5958	5.45e-06	1.93e-05	2.87787
hsa-miR-616-5p	-0.950869	1.84727	-3.49107	0.000523101	0.00151953	-1.44084
hsa-miR-5090	-0.943343	0.185717	-9.40776	1.76e-19	1.6e-18	33.2675
hsa-miR-125b-1-3p	-0.925784	0.717334	-4.21265	2.99e-05	9.89e-05	1.25507
hsa-miR-30c-5p	-0.918856	8.44759	-3.84442	0.000136214	0.000415838	-0.180201
hsa-miR-3154	-0.89878	0.124218	-10.4127	3.86e-23	4.7e-22	41.5907
hsa-miR-154-5p	-0.896059	2.18076	-3.45588	0.000594553	0.00170565	-1.56004
hsa-miR-26b-3p	-0.894414	4.40448	-3.83107	0.000143598	0.000436769	-0.229905
hsa-miR-3131	-0.871978	1.79352	-2.06063	0.0398485	0.0878405	-5.34289
hsa-miR-330-5p	-0.864209	4.28436	-3.37017	0.000808513	0.00228303	-1.8456
hsa-miR-143-5p	-0.85786	6.70554	-2.36308	0.0185005	0.0433814	-4.68123
hsa-miR-4707-5p	-0.842313	0.20051	-6.96364	1.03e-11	5.68e-11	15.6668
hsa-miR-138-1-3p	-0.834644	0.165364	-7.63952	1.1e-13	6.72e-13	20.1238
hsa-miR-877-3p	-0.825485	0.262737	-6.02517	3.25e-09	1.47e-08	10.0512
hsa-miR-658	-0.816975	0.341489	-5.99308	3.91e-09	1.75e-08	9.87148
hsa-miR-550a-3p	-0.803109	1.81211	-3.09769	0.00205854	0.00557908	-2.70775
hsa-miR-4651	-0.796294	0.0550727	-14.3241	2.56e-39	1.43e-37	78.5167
hsa-miR-4436b-5p	-0.795772	0.0367343	-13.1492	3.47e-34	1.1e-32	66.7897
hsa-miR-485-5p	-0.785266	0.322607	-6.05729	2.7e-09	1.24e-08	10.232
hsa-miR-383	-0.785073	0.570202	-3.26207	0.00118056	0.00325962	-2.19599
hsa-miR-1268b	-0.766803	0.157447	-7.37145	6.92e-13	4.04e-12	18.3162
hsa-miR-34c-3p	-0.760021	1.01424	-3.31151	0.000994142	0.00276854	-2.0371
hsa-miR-543	-0.751991	0.77155	-4.06116	5.66e-05	0.000181227	0.649722
hsa-miR-4738-3p	-0.744934	0.191747	-6.60724	9.93e-11	5.13e-10	13.4536
hsa-let-7e-5p	-0.743254	9.07575	-3.0338	0.00253887	0.00681241	-2.89979
hsa-miR-214-5p	-0.730081	3.85398	-2.4215	0.0158066	0.0375551	-4.54321
hsa-miR-4466	-0.719596	0.50531	-3.26374	0.00117376	0.0032464	-2.19066
hsa-miR-1234	-0.717478	0.0797066	-10.1078	5.28e-22	5.89e-21	39.0059
hsa-miR-4784	-0.709724	0.442236	-3.62709	0.000315659	0.000935416	-0.969208
hsa-miR-539-5p	-0.7078	3.05986	-2.76188	0.00595559	0.0151274	-3.67383
hsa-miR-4446-3p	-0.706498	0.347687	-3.95854	8.62e-05	0.000268689	0.251463
hsa-miR-4492	-0.70364	0.234256	-4.26535	2.38e-05	7.95e-05	1.47052
hsa-miR-4453	-0.700571	0.375814	-4.63302	4.59e-06	1.64e-05	3.04246
hsa-miR-151b	-0.675484	1.08227	-3.5144	0.000480239	0.00140005	-1.36116
hsa-miR-299-5p	-0.671829	1.8996	-2.60599	0.00943056	0.023367	-4.08581
hsa-miR-3158-5p	-0.671492	0.263952	-5.19127	3.03e-07	1.19e-06	5.65584
hsa-miR-3934	-0.663312	0.995303	-2.98177	0.0030038	0.00796745	-3.05333
hsa-miR-502-3p	-0.663137	3.39749	-2.58918	0.00989711	0.0243367	-4.12884
hsa-miR-642b-5p	-0.639164	0.0668313	-9.31478	3.72e-19	3.26e-18	32.5268
hsa-miR-5193	-0.632693	0.100091	-8.00263	8.36e-15	5.48e-14	22.6534
hsa-miR-148b-3p	-0.625987	7.1801	-2.94707	0.00335577	0.00882867	-3.15428
hsa-miR-4800-3p	-0.625253	0.0507169	-10.0161	1.15e-21	1.24e-20	38.2385
hsa-miR-5701	-0.615732	0.141869	-5.61214	3.29e-08	1.38e-07	7.80206
hsa-miR-1260b	-0.611099	0.0632642	-9.21339	8.39e-19	7.3e-18	31.725
hsa-miR-551a	-0.601408	0.463515	-2.86049	0.00440445	0.0113478	-3.40125
hsa-miR-4758-3p	-0.600654	0.087192	-7.70909	6.75e-14	4.15e-13	20.6013
hsa-miR-4433-5p	-0.599258	0.0429385	-10.0248	1.07e-21	1.16e-20	38.3113
hsa-miR-132-5p	-0.596588	1.65147	-2.87023	0.00427321	0.0110272	-3.37383
hsa-miR-1291	-0.596155	0.794735	-2.43926	0.0150594	0.0359381	-4.5006
hsa-miR-1914-5p	-0.59279	0.0963044	-7.15855	2.88e-12	1.62e-11	16.9177
hsa-miR-4742-3p	-0.588941	0.513967	-3.49321	0.000519017	0.00151038	-1.43353
hsa-miR-323a-5p	-0.58501	0.0604309	-8.31136	8.74e-16	6.12e-15	24.8754
hsa-miR-181c-5p	-0.574673	4.7766	-2.08718	0.0373709	0.0830579	-5.28836
hsa-miR-4660	-0.563813	0.356334	-3.94094	9.26e-05	0.00028745	0.184099
hsa-miR-4757-5p	-0.563215	0.0459071	-9.81819	6.03e-21	6.18e-20	36.5978
hsa-miR-93-3p	-0.558076	3.81844	-2.14585	0.0323593	0.0727186	-5.16543
hsa-miR-3619-3p	-0.556404	0.18318	-4.88019	1.42e-06	5.3e-06	4.16625
hsa-miR-4728-5p	-0.555844	0.0886077	-6.20328	1.15e-09	5.45e-09	11.0638
hsa-miR-3188	-0.555329	0.197334	-4.9427	1.05e-06	3.96e-06	4.45889
hsa-miR-1224-3p	-0.550555	0.0190031	-16.2412	4.65e-48	8.36e-46	98.501
hsa-miR-4516	-0.547326	0.204537	-3.98001	7.9e-05	0.000249091	0.333997
hsa-miR-3183	-0.545707	0.109936	-6.90684	1.49e-11	8.07e-11	15.3076
hsa-miR-331-5p	-0.538997	1.95552	-2.47398	0.0136881	0.0329574	-4.41643
hsa-miR-3656	-0.5337	0.0449374	-8.73119	3.67e-17	2.87e-16	27.9988
hsa-miR-449a	-0.526675	0.176584	-3.25615	0.0012049	0.00331553	-2.21484
hsa-miR-1225-5p	-0.523742	0.0517678	-7.41418	5.18e-13	3.07e-12	18.6008
hsa-miR-4479	-0.52264	0.131726	-6.03098	3.14e-09	1.43e-08	10.0838
hsa-miR-4442	-0.521044	0.446971	-3.06668	0.00228015	0.0061488	-2.80145
hsa-miR-2277-5p	-0.508561	0.67347	-2.66454	0.00795517	0.0199558	-3.9338
hsa-miR-4780	-0.508394	0.292932	-3.31398	0.000985584	0.00274944	-2.0291
hsa-miR-4799-5p	-0.507748	0.0311151	-10.5943	7.96e-24	1.02e-22	43.1538
hsa-miR-3157-5p	-0.49388	0.195507	-4.37692	1.46e-05	4.97e-05	1.9348
hsa-miR-3158-3p	-0.489507	0.314566	-3.88133	0.000117613	0.000363164	-0.0418727
hsa-miR-3909	-0.487691	0.360384	-3.84512	0.000135836	0.000415467	-0.177583
hsa-miR-4658	-0.482588	0.0961756	-5.94621	5.12e-09	2.27e-08	9.6105
hsa-miR-4524a-3p	-0.481557	0.0446528	-6.9523	1.11e-11	6.08e-11	15.5949
hsa-miR-3610	-0.479283	1.04582	-2.17153	0.0303543	0.068403	-5.11058
hsa-miR-4286	-0.47265	0.1373	-5.07352	5.49e-07	2.12e-06	5.0822
hsa-miR-659-5p	-0.472109	1.1005	-2.4084	0.0163786	0.0386871	-4.57445
hsa-miR-92b-5p	-0.471063	0.293881	-3.48808	0.000528833	0.00153068	-1.45099
hsa-miR-3680-3p	-0.467159	0.47915	-3.02233	0.00263528	0.00705941	-2.93385
hsa-miR-135a-5p	-0.464711	0.502007	-2.08826	0.0372731	0.0829545	-5.28613
hsa-miR-4525	-0.447434	0.0312607	-9.10787	1.94e-18	1.67e-17	30.8973
hsa-miR-4745-3p	-0.435263	0.134138	-4.65715	4.1e-06	1.48e-05	3.14982
hsa-miR-1251	-0.433053	0.118731	-2.8772	0.00418144	0.0108423	-3.35415
hsa-miR-4634	-0.424432	0.0111543	-11.3297	1.12e-26	1.72e-25	49.6556
hsa-miR-551b-3p	-0.424317	0.756723	-1.99867	0.0461781	0.100831	-5.46746
hsa-miR-3678-5p	-0.423765	0.234871	-3.82449	0.000147379	0.000446553	-0.254367
hsa-miR-138-2-3p	-0.421555	0.0219536	-9.75389	1.03e-20	1.02e-19	36.0697
hsa-miR-4732-5p	-0.419021	0.0324779	-8.77713	2.58e-17	2.05e-16	28.3475
hsa-miR-668	-0.418474	0.0785879	-6.18849	1.25e-09	5.93e-09	10.9787
hsa-miR-5001-3p	-0.4175	0.273175	-3.42202	0.000671846	0.00192058	-1.67369
hsa-miR-3193	-0.412267	0.586638	-2.12604	0.0339828	0.0761554	-5.20731
hsa-miR-3191-5p	-0.410157	0.100228	-5.1646	3.47e-07	1.36e-06	5.52485
hsa-miR-1909-5p	-0.409277	0.0215537	-10.1215	4.69e-22	5.31e-21	39.1213
hsa-miR-4683	-0.402511	0.114473	-4.75004	2.65e-06	9.6e-06	3.56783
hsa-miR-4707-3p	-0.39973	0.192366	-3.48497	0.000534875	0.00154223	-1.46157
hsa-miR-4522	-0.397285	0.340112	-2.6318	0.00875235	0.0217531	-4.0192
hsa-miR-5588-3p	-0.394217	0.106871	-4.59322	5.51e-06	1.95e-05	2.86651
hsa-miR-4763-5p	-0.393739	0.0453136	-7.36134	7.41e-13	4.31e-12	18.249
hsa-miR-1237	-0.390721	0.085613	-5.2324	2.45e-07	9.73e-07	5.85899
hsa-miR-4638-5p	-0.386584	0.0290632	-8.4913	2.28e-16	1.63e-15	26.2001
hsa-miR-3177-3p	-0.381519	0.0988511	-5.4416	8.24e-08	3.36e-07	6.91446
hsa-miR-4674	-0.377274	0.153713	-3.7336	0.00021016	0.000627379	-0.58793
hsa-miR-3922-3p	-0.3732	0.480826	-2.46926	0.013868	0.033341	-4.42795
hsa-miR-4667-3p	-0.369074	0.0386882	-7.49174	3.05e-13	1.81e-12	19.1209
hsa-miR-4512	-0.350928	0.0237721	-8.58988	1.08e-16	8.05e-16	26.9347
hsa-miR-4701-5p	-0.345823	0.0426239	-5.80095	1.16e-08	5.01e-08	8.81289
hsa-miR-5571-5p	-0.345658	0.108175	-3.96063	8.55e-05	0.000267155	0.25946
hsa-miR-4687-3p	-0.343649	0.0445414	-6.03953	2.99e-09	1.36e-08	10.1319
hsa-miR-3162-3p	-0.342483	0.0142063	-10.1138	5.02e-22	5.64e-21	39.0559
hsa-miR-3191-3p	-0.338233	0.166665	-3.57977	0.000376984	0.00111104	-1.13522
hsa-miR-4749-3p	-0.32444	0.017762	-8.57221	1.24e-16	9.12e-16	26.8025
hsa-miR-4505	-0.322115	0.041544	-6.52925	1.61e-10	8.13e-10	12.9823
hsa-miR-4767	-0.318369	0.0230866	-8.86043	1.35e-17	1.1e-16	28.9832
hsa-miR-5008-3p	-0.312748	0.0214919	-7.11325	3.89e-12	2.18e-11	16.6244
hsa-miR-4469	-0.311194	0.0668392	-5.05918	5.9e-07	2.27e-06	5.01315
hsa-miR-4768-5p	-0.309628	0.135455	-3.36106	0.00083504	0.00234565	-1.87554
hsa-miR-5087	-0.303665	0.0498163	-4.85786	1.58e-06	5.89e-06	4.06253
hsa-miR-4494	-0.302517	0.0341933	-6.13531	1.71e-09	7.99e-09	10.6744
hsa-miR-3155a	-0.301165	0.0701591	-4.27585	2.28e-05	7.64e-05	1.51373
hsa-miR-4433-3p	-0.298794	0.0362658	-5.26049	2.12e-07	8.46e-07	5.99857
hsa-miR-4717-3p	-0.297971	0.082279	-4.20486	3.09e-05	0.000101993	1.22343
hsa-miR-1265	-0.283683	0.0084987	-14.4574	6.51e-40	4.21e-38	79.8752
hsa-miR-676-5p	-0.280873	0.200035	-2.36057	0.0186245	0.043547	-4.68707
hsa-miR-5690	-0.280408	0.22941	-2.44999	0.014623	0.0349484	-4.4747
hsa-miR-4725-5p	-0.277402	0.0220386	-6.32551	5.55e-10	2.74e-09	11.7734
hsa-miR-4740-5p	-0.273959	0.0482009	-5.38228	1.13e-07	4.53e-07	6.61143
hsa-miR-135a-3p	-0.271119	0.0660073	-3.80886	0.000156728	0.000472822	-0.312242
hsa-miR-3655	-0.270581	0.199057	-2.35898	0.0187039	0.0436695	-4.69079
hsa-miR-4700-5p	-0.266105	0.0534934	-4.58959	5.61e-06	1.98e-05	2.85055
hsa-miR-4437	-0.260843	0.0133303	-7.28053	1.28e-12	7.35e-12	17.7149
hsa-miR-615-5p	-0.25811	0.0472329	-3.96043	8.55e-05	0.000267155	0.258691
hsa-miR-548q	-0.252282	0.256601	-2.19621	0.0285291	0.0649227	-5.05725
hsa-miR-4739	-0.251868	0.0519149	-4.27319	2.3e-05	7.7e-05	1.50279
hsa-miR-2278	-0.248751	0.0752281	-3.48603	0.000532817	0.00153946	-1.45798
hsa-miR-378g	-0.240068	0.0459613	-4.60407	5.24e-06	1.86e-05	2.91437
hsa-miR-4733-5p	-0.237957	0.111485	-2.93026	0.00353952	0.00928193	-3.20279
hsa-miR-550b-2-5p	-0.235438	0.0357636	-4.35147	1.64e-05	5.53e-05	1.82794
hsa-miR-4723-3p	-0.230734	0.0249541	-5.46281	7.36e-08	3.02e-07	7.02354
hsa-miR-4533	-0.221507	0.0351425	-3.74789	0.000198853	0.000594722	-0.536002
hsa-miR-770-5p	-0.221281	0.0723251	-2.95908	0.00322992	0.00851141	-3.11948
hsa-miR-4745-5p	-0.206206	0.0612339	-3.2899	0.00107197	0.00296994	-2.10682
hsa-miR-4436b-3p	-0.204765	0.0379726	-3.51569	0.000477965	0.00139593	-1.35674
hsa-miR-550b-3p	-0.202864	0.0395795	-3.48088	0.000542911	0.00156027	-1.47546
hsa-miR-5006-3p	-0.201475	0.0433192	-3.86902	0.000123533	0.000379993	-0.0881532
hsa-miR-3194-3p	-0.198458	0.0968562	-2.50815	0.0124477	0.030332	-4.33244
hsa-miR-4716-5p	-0.197473	0.0142855	-6.45067	2.6e-10	1.3e-09	12.5121
hsa-miR-4420	-0.194018	0.0218768	-4.33178	1.78e-05	6.01e-05	1.7456
hsa-miR-187-5p	-0.193684	0.0172222	-4.75976	2.53e-06	9.23e-06	3.61203
hsa-miR-4708-3p	-0.193021	0.0328261	-4.64447	4.35e-06	1.56e-05	3.09337
hsa-miR-766-5p	-0.191729	0.079897	-2.95964	0.0032241	0.00850994	-3.11784
hsa-miR-4731-5p	-0.186623	0.0198874	-4.40586	1.29e-05	4.38e-05	2.05707
hsa-miR-2681-5p	-0.181718	0.0072806	-6.1853	1.28e-09	6.03e-09	10.9605
hsa-miR-3064-5p	-0.176306	0.114809	-2.17996	0.0297202	0.067255	-5.09244
hsa-miR-4689	-0.174762	0.0266733	-3.80854	0.000156926	0.000472822	-0.313426
hsa-miR-1908	-0.172256	0.0153325	-5.39499	1.05e-07	4.25e-07	6.67609
hsa-miR-488-5p	-0.166786	0.0177406	-4.21952	2.9e-05	9.62e-05	1.28303
hsa-miR-3914	-0.166455	0.0175245	-4.55441	6.59e-06	2.31e-05	2.69632
hsa-miR-3175	-0.165307	0.0358016	-3.17945	0.00156581	0.00428677	-2.45639
hsa-miR-3198	-0.16489	0.080289	-2.25419	0.0246106	0.0564823	-4.92966
hsa-miR-3195	-0.162414	0.0165505	-5.47702	6.82e-08	2.82e-07	7.09682
hsa-miR-4710	-0.157104	0.0246422	-3.80995	0.000156061	0.000471975	-0.308227
hsa-miR-3944-5p	-0.150455	0.043082	-2.87574	0.0042005	0.0108743	-3.35827
hsa-miR-4717-5p	-0.147507	0.0175956	-4.09087	5e-05	0.00016143	0.766814
hsa-miR-4682	-0.146825	0.0081815	-5.25059	2.23e-07	8.88e-07	5.9493
hsa-miR-4749-5p	-0.141525	0.0631667	-2.58928	0.00989429	0.0243367	-4.12858
hsa-miR-3141	-0.134307	0.00491332	-6.49691	1.96e-10	9.89e-10	12.7882
hsa-miR-4659a-3p	-0.134037	0.0522522	-2.41313	0.0161702	0.0383065	-4.5632
hsa-miR-4506	-0.133887	0.0106319	-4.46651	9.81e-06	3.4e-05	2.31569
hsa-miR-4687-5p	-0.133127	0.0271997	-3.29403	0.00105667	0.00293257	-2.09353
hsa-miR-3173-3p	-0.132478	0.043558	-2.60314	0.009508	0.0234869	-4.0931
hsa-miR-3124-5p	-0.131378	0.01718	-4.01364	6.88e-05	0.000219199	0.464105
hsa-miR-4787-5p	-0.128384	0.0108543	-4.46337	9.95e-06	3.44e-05	2.30224
hsa-miR-3126-5p	-0.124131	0.0217228	-3.4042	0.00071618	0.00203652	-1.73305
hsa-miR-4482-3p	-0.122534	0.032661	-2.5338	0.0115834	0.0283112	-4.26868
hsa-miR-4653-3p	-0.121696	0.0440444	-2.0862	0.0374598	0.0831413	-5.29038
hsa-miR-432-3p	-0.12029	0.0416646	-2.48513	0.0132719	0.0320505	-4.38915
hsa-miR-4529-3p	-0.118679	0.0536948	-2.17234	0.0302928	0.0683595	-5.10884
hsa-miR-4750	-0.115271	0.00928979	-4.81474	1.95e-06	7.2e-06	3.86346
hsa-miR-4425	-0.114404	0.0307411	-2.55044	0.0110516	0.0270522	-4.22696
hsa-miR-3661	-0.113631	0.0173614	-3.19228	0.00149921	0.0041114	-2.41637
hsa-miR-4723-5p	-0.112396	0.0246931	-2.7783	0.0056672	0.0144402	-3.62909
hsa-miR-3133	-0.112104	0.030311	-2.7012	0.0071404	0.0180237	-3.83696
hsa-miR-4423-3p	-0.110045	0.0289516	-2.63251	0.00873424	0.0217415	-4.01735
hsa-miR-3159	-0.109365	0.0269025	-2.74665	0.00623497	0.0158122	-3.7151
hsa-miR-3151	-0.107938	0.00260619	-7.76641	4.51e-14	2.79e-13	20.9973
hsa-miR-572	-0.107303	0.0365265	-2.18419	0.0294058	0.0667302	-5.0833
hsa-miR-5004-3p	-0.107215	0.00701504	-5.00241	7.82e-07	2.97e-06	4.74156
hsa-miR-5002-3p	-0.106962	0.0181621	-3.13473	0.00181984	0.00494873	-2.59463
hsa-miR-4748	-0.106885	0.0352572	-2.15524	0.0316133	0.071141	-5.14545
hsa-miR-4726-3p	-0.10578	0.0372921	-2.10319	0.0359414	0.080322	-5.25514
hsa-miR-1193	-0.105279	0.0126909	-3.99525	7.42e-05	0.000234522	0.392804
hsa-miR-1225-3p	-0.104669	0.0268732	-2.41663	0.0160171	0.0379995	-4.55484
hsa-miR-5196-3p	-0.102581	0.00669228	-6.32801	5.47e-10	2.71e-09	11.788
hsa-miR-5092	-0.100011	0.016423	-3.21905	0.00136859	0.00375956	-2.33238
hsa-miR-596	-0.0918233	0.00495547	-4.60758	5.16e-06	1.84e-05	2.92987
hsa-miR-4743	-0.0880207	0.0208319	-3.37087	0.0008065	0.00228132	-1.84329
hsa-miR-3162-5p	-0.0865892	0.0090389	-4.06203	5.64e-05	0.00018093	0.65315
hsa-miR-3622b-3p	-0.0862076	0.00568416	-5.96454	4.61e-09	2.05e-08	9.71235
hsa-miR-1260a	-0.0841572	0.00886894	-4.0104	6.97e-05	0.000221695	0.451538
hsa-miR-4537	-0.0835431	0.00377923	-5.46354	7.33e-08	3.02e-07	7.02729
hsa-miR-4800-5p	-0.0830049	0.023369	-2.45923	0.0142567	0.0341738	-4.45234
hsa-miR-3152-3p	-0.0819219	0.00668169	-4.69556	3.43e-06	1.24e-05	3.32176
hsa-miR-4467	-0.0817756	0.00509675	-6.21929	1.05e-09	4.98e-09	11.1561
hsa-miR-1238	-0.0816345	0.0208903	-2.33966	0.0196888	0.0458366	-4.73563
hsa-miR-4700-3p	-0.0773679	0.0241133	-2.17917	0.0297786	0.067293	-5.09413
hsa-miR-3064-3p	0.162343	0.11914	2.03549	0.0423212	0.0926599	-5.39387
hsa-miR-4536-3p	0.16536	0.131687	2.02622	0.0432653	0.0945989	-5.41252
hsa-miR-3913-3p	0.168665	0.133586	1.9757	0.0487311	0.10612	-5.51269
hsa-miR-641	0.171516	0.12683	2.05118	0.0407626	0.0896113	-5.36211
hsa-miR-4775	0.172158	0.137149	2.05919	0.0399862	0.0880239	-5.34581
hsa-miR-3926	0.191258	0.16302	1.98993	0.0471353	0.102783	-5.48472
hsa-miR-100-3p	0.199196	0.156726	2.21067	0.0275047	0.0627681	-5.02574
hsa-miR-1185-1-3p	0.205224	0.164811	2.24578	0.0251479	0.0576336	-4.94836
hsa-miR-4777-3p	0.207033	0.167294	2.25728	0.0244155	0.0561141	-4.92277
hsa-miR-4762-3p	0.207369	0.173681	2.28608	0.0226616	0.0522315	-4.8581
hsa-miR-3664-3p	0.219243	0.182127	2.11169	0.0352015	0.0787774	-5.2374
hsa-miR-4726-5p	0.219781	0.181999	2.20745	0.0277297	0.0631924	-5.03276
hsa-miR-5684	0.225927	0.187603	2.29861	0.021933	0.0507691	-4.82969
hsa-miR-4434	0.232331	0.210449	2.07472	0.0385162	0.0852521	-5.31402
hsa-miR-765	0.232411	0.181495	2.49029	0.013083	0.0317365	-4.37648
hsa-miR-4474-3p	0.234105	0.194483	2.34755	0.019281	0.0449519	-4.71735
hsa-miR-3174	0.245862	0.199632	2.43253	0.0153386	0.0364969	-4.51678
hsa-miR-380-3p	0.249174	0.204338	2.29777	0.0219814	0.0508085	-4.83161
hsa-miR-548k	0.254847	0.215561	2.36972	0.0181751	0.0426812	-4.6657
hsa-miR-2116-5p	0.255784	0.237904	2.13134	0.0335413	0.0752701	-5.19613
hsa-miR-3140-3p	0.255959	0.228153	2.30135	0.0217767	0.0504794	-4.82347
hsa-miR-548t-5p	0.273319	0.234733	2.25995	0.0242481	0.0558086	-4.91681
hsa-miR-4677-5p	0.277121	0.242927	2.39813	0.0168395	0.0396599	-4.59881
hsa-miR-1185-5p	0.282769	0.243763	2.40844	0.0163769	0.0386871	-4.57436
hsa-miR-665	0.285726	0.236202	2.56791	0.0105168	0.0258212	-4.18288
hsa-miR-548j	0.28977	0.343241	2.08195	0.0378478	0.0838874	-5.29914
hsa-miR-4484	0.313007	0.281254	2.1856	0.0293018	0.0665875	-5.08025
hsa-miR-548s	0.314419	0.402379	2.10198	0.0360479	0.080449	-5.25766
hsa-miR-2115-3p	0.314698	0.254303	2.40048	0.0167331	0.0394667	-4.59325
hsa-miR-137	0.334512	0.285572	2.36254	0.0185269	0.0433814	-4.68248
hsa-miR-1284	0.343034	0.295217	2.63361	0.00870644	0.0217057	-4.0145
hsa-miR-15a-3p	0.344508	0.307134	2.48053	0.0134423	0.0324137	-4.40042
hsa-miR-3654	0.371493	0.385968	2.03675	0.0421941	0.092507	-5.39133
hsa-miR-186-3p	0.374545	0.389506	2.488	0.0131667	0.0318518	-4.38212
hsa-miR-487a	0.378613	0.439529	2.43347	0.0152996	0.0364577	-4.51454
hsa-miR-34b-5p	0.390698	0.326834	2.50329	0.0126179	0.0307004	-4.34446
hsa-miR-497-3p	0.391015	0.423992	2.45211	0.0145383	0.0347974	-4.46959
hsa-miR-548au-3p	0.404799	0.454651	2.52912	0.011737	0.0286432	-4.28035
hsa-miR-643	0.406867	0.343288	3.09845	0.00205334	0.00557433	-2.70543
hsa-miR-3194-5p	0.411543	0.378412	2.28923	0.0224764	0.0518785	-4.85097
hsa-miR-541-3p	0.416787	0.538756	2.56486	0.0106084	0.0260067	-4.19059
hsa-miR-30a-5p	0.420782	11.8738	1.96786	0.0496287	0.107784	-5.528
hsa-miR-3684	0.432654	0.392261	3.01555	0.00269383	0.00719243	-2.95393
hsa-miR-128	0.448942	6.74828	2.04915	0.040962	0.0899275	-5.36625
hsa-miR-628-3p	0.449041	0.852852	2.06184	0.0397321	0.0877033	-5.34041
hsa-miR-549	0.456644	0.398013	2.90803	0.00379667	0.00989213	-3.26654
hsa-miR-379-3p	0.461605	0.504934	2.92895	0.00355431	0.00930561	-3.20658
hsa-miR-23a-3p	0.469099	11.6436	2.89768	0.0039221	0.0101861	-3.29605
hsa-miR-548d-3p	0.486158	0.476322	2.80145	0.0052819	0.013501	-3.56556
hsa-miR-4709-3p	0.486691	0.401582	3.44762	0.000612599	0.00175431	-1.58786
hsa-miR-624-5p	0.487663	1.00235	2.48791	0.0131699	0.0318518	-4.38233
hsa-miR-660-3p	0.489687	0.536037	2.69235	0.00732975	0.0184441	-3.86044
hsa-miR-561-5p	0.495456	0.447769	2.72819	0.0065894	0.0166588	-3.76483
hsa-miR-4766-3p	0.514721	0.521865	2.87078	0.0042658	0.0110257	-3.37226
hsa-miR-3942-5p	0.519093	0.444449	3.40468	0.000714946	0.00203652	-1.73145
hsa-miR-30e-3p	0.52535	11.8089	3.13734	0.00180404	0.00492231	-2.58662
hsa-miR-3912	0.536807	0.425544	4.16653	3.64e-05	0.000119092	1.0686
hsa-miR-548e	0.5394	0.477362	3.55589	0.000412021	0.00120989	-1.21822
hsa-miR-5706	0.540162	0.460993	3.48966	0.000525802	0.00152464	-1.44563
hsa-miR-545-5p	0.542748	0.66326	2.84239	0.00465819	0.0119634	-3.45197
hsa-miR-454-5p	0.561679	0.620575	3.00121	0.00282163	0.00750888	-2.99625
hsa-miR-3189-3p	0.574033	0.505081	3.08713	0.00213166	0.00575797	-2.73975
hsa-miR-34a-3p	0.588306	0.514222	3.60484	0.000343215	0.00101521	-1.0475
hsa-miR-502-5p	0.589286	0.921234	2.60439	0.00947394	0.0234386	-4.0899
hsa-miR-4999-5p	0.591024	0.627138	3.17643	0.00158185	0.00432337	-2.46577
hsa-miR-206	0.599703	0.560737	2.18264	0.0295204	0.0668965	-5.08664
hsa-miR-539-3p	0.6005	0.475809	3.99834	7.33e-05	0.000232022	0.404784
hsa-miR-299-3p	0.603132	0.504769	4.12492	4.33e-05	0.000140818	0.901985
hsa-miR-145-3p	0.61697	5.50807	2.30466	0.0215891	0.0501164	-4.81594
hsa-miR-9-3p	0.621861	0.620767	2.6608	0.0080428	0.0201444	-3.94361
hsa-miR-155-3p	0.625772	0.719359	2.74596	0.00624796	0.0158204	-3.71698
hsa-miR-345-3p	0.627426	0.619294	3.32165	0.000959436	0.00268112	-2.00421
hsa-miR-580	0.62962	0.571552	3.48456	0.000535681	0.00154223	-1.46297
hsa-miR-196b-3p	0.634136	0.810571	2.59285	0.0097934	0.0241551	-4.11945
hsa-miR-4652-5p	0.652271	0.944941	1.97376	0.0489513	0.106456	-5.51648
hsa-miR-654-3p	0.652461	4.40363	2.08886	0.037219	0.0829481	-5.28489
hsa-miR-556-3p	0.655551	0.631718	3.41318	0.000693513	0.00197902	-1.70318
hsa-miR-499a-5p	0.659176	0.571445	2.2281	0.0263118	0.0602156	-4.98747
hsa-miR-340-3p	0.663956	2.54632	2.96884	0.0031308	0.00829072	-3.09108
hsa-miR-3614-3p	0.669322	0.61343	3.58144	0.000374643	0.00110615	-1.12939
hsa-miR-3117-3p	0.679156	0.57436	4.00074	7.26e-05	0.000230202	0.41408
hsa-miR-29a-3p	0.684984	12.9428	3.05666	0.00235625	0.00634344	-2.8315
hsa-miR-656	0.693545	0.60787	3.83105	0.00014361	0.000436769	-0.229985
hsa-miR-18b-5p	0.704965	0.67149	3.39504	0.000740027	0.00210064	-1.76347
hsa-miR-216a	0.706363	0.817382	3.05315	0.00238353	0.00640622	-2.84204
hsa-miR-758	0.710471	2.8617	2.64843	0.0083389	0.0208215	-3.97595
hsa-let-7f-2-3p	0.711882	0.615687	4.18569	3.35e-05	0.000110235	1.14581
hsa-miR-224-3p	0.718406	1.52994	2.69324	0.00731054	0.0184244	-3.85808
hsa-miR-652-5p	0.720922	0.749434	3.51811	0.000473727	0.00138606	-1.34843
hsa-miR-380-5p	0.723233	0.578914	4.65	4.24e-06	1.52e-05	3.11798
hsa-miR-556-5p	0.725799	0.676328	3.36415	0.000825973	0.00232422	-1.86542
hsa-miR-376a-3p	0.731093	0.60888	3.85643	0.000129875	0.000398744	-0.135322
hsa-miR-409-5p	0.754807	3.32892	2.37626	0.0178597	0.0420014	-4.65037
hsa-miR-155-5p	0.822645	8.07946	2.46522	0.0140232	0.0336641	-4.43777
hsa-miR-3662	0.832815	0.80989	3.35296	0.000859312	0.00240548	-1.90211
hsa-miR-183-3p	0.842216	1.00801	3.57383	0.00038543	0.00113386	-1.15592
hsa-miR-381	0.843149	5.19781	3.76013	0.000189622	0.000568164	-0.491354
hsa-miR-570-3p	0.857949	0.79113	3.93	9.67e-05	0.000299863	0.142382
hsa-miR-548f	0.85963	0.826726	2.7881	0.00550101	0.0140388	-3.60225
hsa-miR-3065-5p	0.867798	1.09521	2.96464	0.00317307	0.00838892	-3.1033
hsa-miR-576-5p	0.872059	3.49014	3.26053	0.00118684	0.0032714	-2.2009
hsa-miR-186-5p	0.882922	8.06831	4.17997	3.43e-05	0.000112719	1.12272
hsa-miR-25-3p	0.897274	12.8752	3.96984	8.23e-05	0.000258126	0.294824
hsa-miR-219-5p	0.900641	0.896546	3.97036	8.21e-05	0.000258126	0.296841
hsa-miR-107	0.937513	5.82837	4.93486	1.09e-06	4.1e-06	4.42199
hsa-miR-146a-3p	0.942162	0.923174	2.31108	0.0212286	0.0493504	-4.80128
hsa-miR-200b-3p	0.942692	10.8748	3.36045	0.000836863	0.0023467	-1.87756
hsa-miR-223-5p	0.945921	2.16306	2.80429	0.00523625	0.0134055	-3.55773
hsa-miR-431-5p	0.955452	1.64796	3.66569	0.000272704	0.000812588	-0.832248
hsa-miR-32-3p	0.979804	0.995894	4.62808	4.69e-06	1.68e-05	3.02058
hsa-miR-26a-1-3p	0.983705	2.16867	4.75433	2.6e-06	9.45e-06	3.58733
hsa-miR-130a-3p	0.991899	5.01375	3.66443	0.000274006	0.000814966	-0.836709
hsa-miR-148a-5p	0.993627	5.99662	3.3743	0.00079674	0.00225766	-1.832
hsa-miR-5683	0.995317	0.860505	2.76474	0.00590441	0.015021	-3.66605
hsa-miR-491-3p	0.998109	0.946906	4.37039	1.51e-05	5.1e-05	1.90732
hsa-miR-376b	1.00726	0.892806	4.51104	8.02e-06	2.79e-05	2.50766
hsa-miR-411-3p	1.01623	0.937483	4.9582	9.72e-07	3.68e-06	4.53195
hsa-miR-4772-5p	1.03294	0.958472	4.04046	6.16e-05	0.000196665	0.568596
hsa-miR-148b-5p	1.03436	1.82805	4.47022	9.65e-06	3.35e-05	2.33163
hsa-miR-4791	1.03563	1.04379	4.06636	5.54e-05	0.000178419	0.67015
hsa-miR-147b	1.03815	1.81501	2.99872	0.00284437	0.00755697	-3.00358
hsa-miR-103a-3p	1.04055	13.5482	4.83205	1.79e-06	6.64e-06	3.9432
hsa-miR-1277-3p	1.06599	1.20651	4.53494	7.2e-06	2.52e-05	2.61139
hsa-miR-376a-5p	1.07189	1.09509	4.80733	2.02e-06	7.42e-06	3.82943
hsa-miR-377-3p	1.08011	1.12092	5.01094	7.5e-07	2.86e-06	4.78217
hsa-miR-301b	1.12431	1.13358	4.23832	2.68e-05	8.89e-05	1.35968
hsa-miR-3913-5p	1.15859	1.34083	6.04456	2.91e-09	1.33e-08	10.1602
hsa-miR-3677-5p	1.18308	1.33968	4.54846	6.77e-06	2.37e-05	2.67031
hsa-miR-28-5p	1.18558	6.71251	8.67703	5.56e-17	4.26e-16	27.5894
hsa-miR-627	1.18647	1.50508	4.52336	7.59e-06	2.65e-05	2.56105
hsa-miR-5586-5p	1.20939	1.09769	5.75921	1.47e-08	6.31e-08	8.58691
hsa-miR-33a-3p	1.23125	1.41487	5.00485	7.73e-07	2.94e-06	4.75319
hsa-miR-154-3p	1.23462	1.21226	5.57942	3.93e-08	1.65e-07	7.62989
hsa-miR-4444	1.24756	1.26475	5.42931	8.79e-08	3.58e-07	6.85144
hsa-miR-493-3p	1.27633	2.58535	5.40738	9.87e-08	4e-07	6.73927
hsa-miR-4668-3p	1.27666	1.58148	5.92817	5.67e-09	2.5e-08	9.51049
hsa-miR-34c-5p	1.27901	1.33156	4.88633	1.38e-06	5.16e-06	4.19481
hsa-miR-496	1.28977	1.36468	5.53753	4.93e-08	2.06e-07	7.41075
hsa-miR-135b-3p	1.29093	1.25968	4.37101	1.5e-05	5.09e-05	1.90992
hsa-miR-301a-5p	1.29272	2.27226	3.97026	8.22e-05	0.000258126	0.296448
hsa-miR-5000-3p	1.32794	1.38753	6.15929	1.49e-09	7.01e-09	10.8114
hsa-miR-493-5p	1.32849	3.03772	5.56032	4.36e-08	1.82e-07	7.52978
hsa-miR-382-3p	1.40625	1.34454	6.23543	9.5e-10	4.55e-09	11.2493
hsa-miR-27b-5p	1.40766	3.94491	6.76093	3.78e-11	2e-10	14.3961
hsa-miR-22-3p	1.46435	15.4176	8.78373	2.45e-17	1.96e-16	28.3977
hsa-miR-655	1.46891	1.36872	6.31412	5.94e-10	2.91e-09	11.7068
hsa-miR-2355-3p	1.51748	2.03014	5.40388	1.01e-07	4.07e-07	6.72143
hsa-let-7g-5p	1.52444	9.19037	7.50482	2.78e-13	1.66e-12	19.209
hsa-miR-362-3p	1.54213	1.56449	5.68822	2.17e-08	9.2e-08	8.20582
hsa-miR-146a-5p	1.55446	7.50192	4.20439	3.1e-05	0.000101993	1.22154
hsa-miR-31-5p	1.59419	2.46068	2.62657	0.00888608	0.0220517	-4.03274
hsa-miR-10b-3p	1.60055	3.31296	5.82367	1.02e-08	4.43e-08	8.93654
hsa-miR-31-3p	1.60099	1.80029	3.02041	0.00265172	0.0070917	-2.93954
hsa-miR-27a-5p	1.60171	4.52139	4.55457	6.58e-06	2.31e-05	2.69699
hsa-miR-34a-5p	1.61753	6.63761	5.72708	1.75e-08	7.52e-08	8.41395
hsa-miR-26a-5p	1.63151	10.5959	8.74438	3.31e-17	2.62e-16	28.0988
hsa-miR-514a-3p	1.6423	1.51496	3.0906	0.00210734	0.00570179	-2.72924
hsa-miR-130b-3p	1.65553	4.44172	6.04979	2.82e-09	1.29e-08	10.1897
hsa-miR-651	1.65926	1.91716	5.9166	6.06e-09	2.66e-08	9.44651
hsa-miR-3677-3p	1.68931	2.83247	4.91408	1.21e-06	4.52e-06	4.32445
hsa-miR-30d-3p	1.68998	2.22457	7.39258	5.99e-13	3.51e-12	18.4568
hsa-miR-24-1-5p	1.69413	3.70746	6.95348	1.1e-11	6.05e-11	15.6024
hsa-miR-508-3p	1.70094	2.80115	2.91078	0.00376394	0.00982268	-3.25867
hsa-miR-199a-3p	1.70593	11.0197	6.53894	1.52e-10	7.71e-10	13.0405
hsa-miR-369-5p	1.71222	2.26477	5.32979	1.48e-07	5.94e-07	6.34573
hsa-miR-151a-3p	1.72059	11.1654	8.18273	2.26e-15	1.53e-14	23.9418
hsa-let-7f-1-3p	1.75061	1.89946	8.05548	5.71e-15	3.8e-14	23.0292
hsa-miR-10b-5p	1.76409	14.8688	6.31736	5.83e-10	2.86e-09	11.7257
hsa-miR-33b-5p	1.77178	2.33207	5.05112	6.14e-07	2.36e-06	4.97443
hsa-miR-146b-5p	1.78248	8.70268	6.66707	6.83e-11	3.54e-10	13.8183
hsa-miR-224-5p	1.78447	6.10208	4.45929	1.01e-05	3.5e-05	2.28475
hsa-miR-181d	1.8052	3.9594	5.36036	1.26e-07	5.07e-07	6.50017
hsa-miR-21-3p	1.82899	11.465	7.25537	1.51e-12	8.67e-12	17.5496
hsa-miR-374b-3p	1.86402	1.73814	8.43744	3.41e-16	2.41e-15	25.8013
hsa-miR-26a-2-3p	1.87015	2.23534	7.83094	2.86e-14	1.8e-13	21.4459
hsa-miR-194-5p	1.91073	13.9829	6.34068	5.07e-10	2.51e-09	11.8622
hsa-miR-153	1.93153	1.81949	5.47444	6.92e-08	2.85e-07	7.08351
hsa-miR-17-3p	1.96319	8.39381	7.53711	2.23e-13	1.35e-12	19.4272
hsa-miR-16-1-3p	1.97645	2.23648	8.03176	6.78e-15	4.47e-14	22.8603
hsa-miR-193a-3p	1.99857	2.80421	6.85009	2.15e-11	1.15e-10	14.9512
hsa-miR-24-3p	2.01505	10.8698	11.3321	1.09e-26	1.7e-25	49.6774
hsa-miR-95	2.02107	3.77908	5.5097	5.73e-08	2.38e-07	7.266
hsa-miR-22-5p	2.02781	4.33753	7.12292	3.65e-12	2.05e-11	16.6869
hsa-miR-421	2.0299	1.92744	7.24094	1.66e-12	9.52e-12	17.455
hsa-miR-503	2.04235	2.917	5.14621	3.81e-07	1.49e-06	5.43494
hsa-miR-4662a-5p	2.0579	2.96995	5.18066	3.2e-07	1.26e-06	5.60363
hsa-miR-101-5p	2.06915	2.63783	7.9072	1.66e-14	1.06e-13	21.9797
hsa-miR-451a	2.0711	7.73079	4.4585	1.02e-05	3.5e-05	2.28133
hsa-miR-4677-3p	2.11795	2.81058	9.61847	3.15e-20	3.03e-19	34.965
hsa-miR-192-5p	2.12142	15.7937	5.98043	4.21e-09	1.88e-08	9.80088
hsa-miR-27a-3p	2.13007	10.4374	8.14071	3.07e-15	2.06e-14	23.6392
hsa-miR-196a-5p	2.14305	7.73577	4.81189	1.98e-06	7.28e-06	3.85036
hsa-miR-10a-3p	2.14328	2.98302	6.39464	3.66e-10	1.82e-09	12.1799
hsa-miR-188-5p	2.14941	2.38848	6.10036	2.1e-09	9.75e-09	10.4756
hsa-miR-29a-5p	2.14994	3.55052	7.92419	1.47e-14	9.4e-14	22.0992
hsa-miR-495	2.17957	2.7242	9.43962	1.36e-19	1.25e-18	33.5225
hsa-miR-653	2.18672	2.41342	5.231	2.47e-07	9.78e-07	5.85202
hsa-miR-190a	2.22775	2.32285	8.30848	8.93e-16	6.23e-15	24.8544
hsa-miR-301a-3p	2.26736	2.91379	7.88434	1.95e-14	1.24e-13	21.8192
hsa-miR-590-3p	2.27073	2.66476	8.89214	1.06e-17	8.63e-17	29.2264
hsa-miR-582-5p	2.29142	3.49262	8.99451	4.74e-18	3.94e-17	30.0157
hsa-miR-136-3p	2.30279	2.91509	8.20744	1.88e-15	1.29e-14	24.1203
hsa-miR-185-5p	2.31799	5.62815	11.3413	1e-26	1.58e-25	49.7606
hsa-miR-195-5p	2.3493	4.54202	7.95266	1.2e-14	7.72e-14	22.2998
hsa-miR-16-2-3p	2.36463	3.08051	8.5385	1.59e-16	1.16e-15	26.551
hsa-miR-144-3p	2.4156	2.62445	5.68871	2.17e-08	9.2e-08	8.20844
hsa-miR-454-3p	2.45951	2.80208	10.2205	2.02e-22	2.36e-21	39.9554
hsa-miR-337-3p	2.46269	4.50161	9.6017	3.62e-20	3.42e-19	34.8289
hsa-miR-376c	2.47391	2.36445	8.26125	1.27e-15	8.79e-15	24.5104
hsa-miR-29c-3p	2.49807	9.61117	7.80767	3.37e-14	2.11e-13	21.2837
hsa-miR-369-3p	2.50248	2.89101	9.8577	4.34e-21	4.47e-20	36.9236
hsa-miR-127-5p	2.55743	7.59576	9.77445	8.68e-21	8.72e-20	36.2383
hsa-miR-1307-5p	2.57945	8.23483	5.85267	8.69e-09	3.78e-08	9.0949
hsa-miR-10a-5p	2.58669	15.84	7.77723	4.18e-14	2.6e-13	21.0723
hsa-miR-222-5p	2.58768	3.41219	7.98716	9.35e-15	6.1e-14	22.5438
hsa-miR-628-5p	2.60042	3.68347	12.5634	1.05e-31	2.54e-30	61.1255
hsa-miR-450a-5p	2.66231	2.56339	8.8145	1.93e-17	1.55e-16	28.6322
hsa-miR-19b-1-5p	2.6762	3.66115	9.02306	3.79e-18	3.18e-17	30.237
hsa-miR-126-3p	2.67889	10.8015	10.9398	3.76e-25	5.15e-24	46.1752
hsa-miR-218-5p	2.67952	3.82203	8.15963	2.67e-15	1.81e-14	23.7753
hsa-miR-199b-5p	2.68715	6.3939	8.66764	5.97e-17	4.54e-16	27.5186
hsa-miR-30b-5p	2.68912	8.15403	8.84013	1.58e-17	1.28e-16	28.8279
hsa-miR-15b-3p	2.69262	4.97992	9.72296	1.33e-20	1.3e-19	35.8164
hsa-miR-136-5p	2.71411	4.36195	8.94515	6.98e-18	5.76e-17	29.6343
hsa-miR-200a-3p	2.73271	8.99818	8.06226	5.43e-15	3.63e-14	23.0775
hsa-miR-148a-3p	2.73788	15.79	9.73243	1.23e-20	1.21e-19	35.8939
hsa-miR-30e-5p	2.75013	12.0663	14.3901	1.3e-39	7.79e-38	79.1892
hsa-miR-452-3p	2.76369	3.14287	7.53459	2.27e-13	1.36e-12	19.4101
hsa-miR-411-5p	2.77411	2.79694	10.4024	4.22e-23	5.06e-22	41.5027
hsa-miR-7-1-3p	2.82331	4.79829	9.87773	3.67e-21	3.81e-20	37.0891
hsa-miR-181b-3p	2.82848	3.65372	8.66782	5.96e-17	4.54e-16	27.52
hsa-miR-455-5p	2.83736	3.85643	9.69497	1.68e-20	1.62e-19	35.5878
hsa-miR-152	2.84116	7.49433	13.2145	1.82e-34	6.04e-33	67.4294
hsa-miR-143-3p	2.8413	16.7205	7.96853	1.07e-14	6.92e-14	22.412
hsa-miR-26b-5p	2.84376	9.06731	11.017	1.88e-25	2.65e-24	46.8584
hsa-miR-17-5p	2.9113	9.76239	8.45885	2.91e-16	2.06e-15	25.9596
hsa-miR-450b-5p	2.91868	3.13922	10.1774	2.92e-22	3.37e-21	39.5912
hsa-miR-16-5p	2.94669	9.16625	11.6018	9.21e-28	1.57e-26	52.1277
hsa-miR-140-5p	2.97199	5.12873	14.0747	3.26e-38	1.43e-36	75.9903
hsa-miR-2355-5p	2.98873	4.86389	12.3442	8.61e-31	2.02e-29	59.0394
hsa-miR-24-2-5p	3.0062	4.61645	12.3171	1.11e-30	2.54e-29	58.7834
hsa-miR-15a-5p	3.05263	6.84401	11.9784	2.76e-29	5.64e-28	55.6042
hsa-miR-660-5p	3.06285	5.40803	9.97618	1.61e-21	1.72e-20	37.9057
hsa-miR-590-5p	3.0792	4.03377	10.3757	5.32e-23	6.33e-22	41.2742
hsa-miR-3613-5p	3.12276	3.73045	9.81694	6.09e-21	6.2e-20	36.5876
hsa-miR-20a-3p	3.17711	4.22196	8.55699	1.39e-16	1.02e-15	26.6889
hsa-miR-203	3.20954	13.9784	8.63797	7.49e-17	5.66e-16	27.2954
hsa-miR-7-5p	3.26631	3.48167	7.87535	2.08e-14	1.32e-13	21.7562
hsa-miR-96-5p	3.2737	4.10948	10.1305	4.35e-22	4.96e-21	39.1963
hsa-miR-340-5p	3.2768	3.40037	11.7733	1.88e-28	3.49e-27	53.703
hsa-miR-217	3.3182	4.7671	8.58166	1.15e-16	8.53e-16	26.8732
hsa-miR-708-5p	3.35262	4.08976	9.77048	8.97e-21	8.96e-20	36.2057
hsa-miR-98	3.36714	5.54988	14.5044	4.02e-40	2.95e-38	80.3548
hsa-miR-1	3.39542	4.78885	6.74915	4.08e-11	2.15e-10	14.3232
hsa-let-7a-3p	3.44025	4.65913	13.1323	4.1e-34	1.28e-32	66.6252
hsa-miR-379-5p	3.45767	9.359	13.063	8.11e-34	2.38e-32	65.9486
hsa-miR-889	3.46055	3.86039	14.0742	3.28e-38	1.43e-36	75.9855
hsa-miR-215	3.51075	8.95326	6.1574	1.51e-09	7.04e-09	10.8005
hsa-miR-708-3p	3.5146	4.95299	11.3701	7.73e-27	1.24e-25	50.0206
hsa-miR-374b-5p	3.536	6.02384	14.2567	5.1e-39	2.58e-37	77.8325
hsa-miR-335-5p	3.54983	4.12439	11.7583	2.16e-28	3.97e-27	53.5648
hsa-miR-552	3.55061	5.29212	6.23521	9.51e-10	4.55e-09	11.248
hsa-let-7f-5p	3.58173	12.5357	14.1159	2.14e-38	1.02e-36	76.4063
hsa-miR-141-3p	3.73136	9.79199	11.1032	8.69e-26	1.27e-24	47.6246
hsa-miR-18a-5p	3.76275	4.63007	9.39738	1.91e-19	1.73e-18	33.1846
hsa-miR-141-5p	3.80607	9.25471	13.0819	6.73e-34	2.02e-32	66.1326
hsa-miR-335-3p	3.81014	7.44799	11.7478	2.38e-28	4.33e-27	53.4679
hsa-miR-452-5p	3.81673	6.50369	11.9086	5.3e-29	1.02e-27	54.9554
hsa-miR-582-3p	3.82881	8.20174	12.9962	1.56e-33	4.36e-32	65.2984
hsa-miR-126-5p	3.86054	7.04142	15.1632	4.28e-43	4.61e-41	87.1503
hsa-miR-32-5p	3.90846	4.69752	13.2141	1.83e-34	6.04e-33	67.4258
hsa-miR-577	3.91732	5.67446	7.98092	9.78e-15	6.35e-14	22.4996
hsa-miR-106b-5p	3.92955	8.04608	14.4728	5.56e-40	3.75e-38	80.0325
hsa-miR-33a-5p	3.95903	5.21177	8.47461	2.58e-16	1.84e-15	26.0762
hsa-miR-144-5p	3.96955	5.66361	9.61561	3.22e-20	3.07e-19	34.9418
hsa-miR-592	3.97741	4.29905	6.54961	1.42e-10	7.29e-10	13.1048
hsa-miR-101-3p	3.9897	12.4348	17.118	3.57e-52	1.16e-49	107.912
hsa-miR-3545-3p	4.09685	7.11648	9.02507	3.73e-18	3.14e-17	30.2525
hsa-miR-20a-5p	4.19031	8.75272	11.529	1.8e-27	3e-26	51.4633
hsa-miR-29b-3p	4.28681	9.42825	13.52	8.75e-36	3.22e-34	70.441
hsa-miR-374a-5p	4.29087	4.8932	16.946	2.32e-51	5.35e-49	106.055
hsa-miR-429	4.33977	8.33794	11.7882	1.63e-28	3.07e-27	53.8403
hsa-miR-19a-3p	4.4891	5.43863	11.4325	4.37e-27	7.06e-26	50.5859
hsa-miR-142-5p	4.61297	6.13464	13.6635	2.08e-36	7.82e-35	71.8674
hsa-miR-424-5p	4.69642	6.79204	12.8251	8.32e-33	2.14e-31	63.6393
hsa-miR-542-3p	4.76646	6.9997	16.0558	3.38e-47	4.97e-45	96.5306
hsa-miR-135b-5p	4.90625	5.93309	9.88939	3.33e-21	3.47e-20	37.1855
hsa-miR-21-5p	5.03016	17.4526	22.0407	5.35e-76	8.65e-73	162.419
hsa-miR-19b-3p	5.03847	7.50612	14.2961	3.41e-39	1.78e-37	78.2319
hsa-miR-374a-3p	5.9557	9.56432	18.7196	7.98e-60	6.46e-57	125.414
