# Supplementary material for: Expression profile, molecular functions, and prognostic significance of miRNAs in primary colorectal cancer stem cells
Source: Aging (Albany NY). 2021 Apr 1;13(8):12067–85. doi: 10.18632/aging.202914 (PMC8109135; doi:10.18632/aging.202914)
Supplement: Supplementary Table 4 [file aging-13-202914-s005.xlsx]

## Sheet: Table S4_diff_mRNA_FC_2.0_TCGA
Supplementary Table 4. Differentially expressed mRNAs between normal and cancer tissues in patients with CRC from the TCGA dataset.
mRNA	logFC	AveExpr	t	P.Value	adj.P.Val	B
CA1	-229.499	6.81099	-44.3868	9.46e-177	1.43e-172	379.863
BEST4	-42.7539	1.50335	-42.7354	3.67e-170	2.79e-166	365.83
OTOP2	-37.6577	0.758484	-40.4701	6.94e-161	3.51e-157	345.971
TRPM6	-15.5362	1.04793	-38.1044	6.7e-151	2.54e-147	324.467
TMIGD1	-119.097	3.53896	-36.7538	4.6e-145	1.39e-141	311.841
GUCA2A	-1208.2	50.1948	-36.5636	3.11e-144	7.86e-141	310.042
CA2	-637.58	36.2099	-36.5147	5.09e-144	1.1e-140	309.578
BMP3	-11.8944	0.529486	-36.478	7.36e-144	1.39e-140	309.231
CHP2	-167.156	13.2943	-35.7494	1.17e-140	1.97e-137	302.285
SLC51B	-86.1052	6.68763	-35.3681	5.67e-139	8.6e-136	298.621
SLC4A4	-36.2809	2.15936	-34.1276	1.96e-133	2.71e-130	286.563
GUCA2B	-231.756	6.78358	-32.4064	1.29e-125	1.63e-122	269.49
CA4	-206.279	9.70925	-31.7853	9.3e-123	1.09e-119	263.235
SLC26A3	-1212.02	69.4031	-30.8956	1.24e-118	1.35e-115	254.189
ADAMDEC1	-114.736	12.4988	-30.8169	2.89e-118	2.93e-115	253.384
SCARA5	-17.2679	1.20456	-30.7123	8.9e-118	8.43e-115	252.313
C2orf88	-18.4222	1.82262	-30.1662	3.2e-115	2.85e-112	246.7
PYY	-56.712	2.19563	-29.3905	1.44e-111	1.19e-108	238.668
USP2	-11.4406	0.795861	-29.387	1.49e-111	1.19e-108	238.632
TMEM72	-7.63588	0.541773	-29.0808	4.2e-110	3.18e-107	235.443
TMEM236	-20.2885	2.04369	-28.9592	1.58e-109	1.14e-106	234.173
UGT1A8	-7.11788	0.478667	-28.6759	3.51e-108	2.42e-105	231.208
PKIB	-42.8719	3.55709	-28.4602	3.73e-107	2.46e-104	228.947
PHLPP2	-8.37791	1.64302	-28.2927	2.34e-106	1.48e-103	227.186
CLCA4	-390.839	14.7808	-27.8548	2.9e-104	1.76e-101	222.572
SLC25A34	-6.2973	0.496825	-27.1114	1.07e-100	6.25e-98	214.693
SCGN	-9.40404	0.59127	-26.9658	5.38e-100	3.02e-97	213.144
CDKN2B	-37.6752	4.63291	-25.9981	2.55e-95	1.38e-92	202.802
CLDN23	-67.3838	8.90373	-25.963	3.77e-95	1.97e-92	202.425
SLC26A2	-222.734	17.0861	-25.6087	1.97e-93	9.98e-91	198.619
TMEM37	-62.717	8.24384	-25.5542	3.63e-93	1.77e-90	198.034
CLEC3B	-29.9892	2.86916	-25.4614	1.02e-92	4.85e-90	197.035
CEACAM7	-1144.86	83.8128	-25.43	1.46e-92	6.69e-90	196.696
UGT1A10	-17.2012	1.67679	-25.294	6.68e-92	2.98e-89	195.231
CD163L1	-8.59558	1.21719	-24.8873	6.37e-90	2.76e-87	190.843
SULT1A2	-10.9377	0.853481	-24.8323	1.18e-89	4.97e-87	190.249
ADH1C	-211.251	18.0854	-24.6971	5.38e-89	2.21e-86	188.787
MS4A12	-239.93	9.96791	-23.7971	1.34e-84	5.34e-82	179.032
SEMA6D	-7.12379	0.967693	-23.291	4e-82	1.56e-79	173.53
UGP2	-49.1241	16.1969	-23.2128	9.66e-82	3.66e-79	172.679
IL6R	-11.1326	2.17239	-22.9224	2.55e-80	9.44e-78	169.518
SMPDL3A	-48.9026	9.17935	-22.7699	1.42e-79	5.14e-77	167.857
SLC22A5	-5.39535	1.96156	-22.693	3.39e-79	1.2e-76	167.019
CD177	-229.292	9.0855	-22.4795	3.77e-78	1.3e-75	164.693
EDN3	-27.0731	3.18468	-22.3255	2.14e-77	7.21e-75	163.015
AQP8	-898.778	22.3437	-22.2763	3.73e-77	1.23e-74	162.478
SLC51A	-13.3501	0.986852	-22.1635	1.33e-76	4.29e-74	161.249
HHLA2	-62.2671	10.1603	-21.9775	1.08e-75	3.42e-73	159.22
RETSAT	-80.1451	29.3418	-21.4163	6.06e-73	1.88e-70	153.101
SPIB	-12.085	0.81127	-21.3816	8.96e-73	2.72e-70	152.722
APPL2	-29.4427	11.8327	-21.254	3.77e-72	1.1e-69	151.332
RPL12P14	-5.38231	0.926159	-21.2536	3.79e-72	1.1e-69	151.327
CA7	-58.8906	2.26437	-21.1809	8.59e-72	2.46e-69	150.535
AHCYL2	-69.1328	13.6083	-21.11	1.91e-71	5.36e-69	149.763
ENTPD5	-28.0947	6.27331	-20.9973	6.79e-71	1.87e-68	148.534
PEX26	-8.63365	3.57932	-20.9808	8.17e-71	2.21e-68	148.355
SLC9A3	-147.196	12.7441	-20.9626	1e-70	2.67e-68	148.156
NR3C2	-18.4824	3.48195	-20.8099	5.59e-70	1.46e-67	146.492
UGT2B17	-322.234	22.3799	-20.7516	1.08e-69	2.77e-67	145.857
SLC36A1	-12.2401	3.89924	-20.7479	1.12e-69	2.84e-67	145.817
SECTM1	-79.4486	10.0037	-20.7243	1.46e-69	3.64e-67	145.56
C1orf115	-45.4258	9.45505	-20.2303	3.76e-67	9.2e-65	140.185
BTNL8	-31.8568	3.21428	-20.1132	1.4e-66	3.37e-64	138.912
TMEM82	-13.2484	1.54758	-20.1006	1.61e-66	3.82e-64	138.775
PLAC8	-98.2344	12.8235	-20.0113	4.38e-66	1.02e-63	137.805
GNA11	-56.1704	22.0215	-19.7926	5.08e-65	1.17e-62	135.43
TP53INP2	-54.9309	11.3196	-19.6927	1.55e-64	3.51e-62	134.347
CWH43	-14.4081	1.25444	-19.6473	2.58e-64	5.75e-62	133.855
PLCD1	-17.1934	4.67767	-19.5302	9.54e-64	2.1e-61	132.586
IGHV3OR16-13	-17.9597	1.17591	-19.4148	3.46e-63	7.5e-61	131.336
IGHV3-7	-41.1816	2.6678	-19.413	3.53e-63	7.55e-61	131.316
ACADS	-80.6527	21.8685	-19.367	5.91e-63	1.24e-60	130.818
MAMDC2	-4.97411	0.388223	-19.247	2.25e-62	4.68e-60	129.52
MT1M	-65.5411	4.66196	-19.2052	3.59e-62	7.35e-60	129.068
LDHD	-34.61	5.38448	-19.1918	4.17e-62	8.42e-60	128.923
HSD17B2	-17.9632	1.9716	-19.0218	2.77e-61	5.52e-59	127.086
ETFDH	-11.2903	4.42653	-18.8354	2.2e-60	4.33e-58	125.075
ABCG2	-21.5968	0.981805	-18.794	3.48e-60	6.77e-58	124.629
IGKV2-30	-38.7132	3.0651	-18.7545	5.4e-60	1.04e-57	124.203
PP7080	-114.729	14.923	-18.5879	3.43e-59	6.5e-57	122.41
SLC22A18AS	-18.0339	4.41247	-18.544	5.57e-59	1.04e-56	121.938
SLC17A4	-9.02497	1.24242	-18.5309	6.45e-59	1.19e-56	121.796
PDCD4	-57.9334	21.5245	-18.3467	4.95e-58	9.05e-56	119.817
GDPD2	-11.5809	1.22929	-18.3026	8.06e-58	1.46e-55	119.344
LRRC19	-32.8283	6.5474	-18.1772	3.22e-57	5.75e-55	117.999
TSPAN7	-26.6977	5.35802	-18.0077	2.09e-56	3.68e-54	116.184
DHRS11	-32.6047	7.85914	-17.9154	5.77e-56	1.01e-53	115.197
WSCD1	-4.99877	0.808863	-17.8515	1.16e-55	2.01e-53	114.515
KLF4	-109.138	23.8107	-17.8265	1.53e-55	2.61e-53	114.248
ADTRP	-33.2979	4.26767	-17.6852	7.23e-55	1.22e-52	112.741
TMEM253	-6.0683	0.735727	-17.6184	1.51e-54	2.51e-52	112.029
PADI2	-79.1465	11.5839	-17.5697	2.57e-54	4.23e-52	111.511
FUCA1	-105.981	43.4505	-17.5034	5.3e-54	8.64e-52	110.806
JCHAIN	-2483.77	251.063	-17.4381	1.08e-53	1.75e-51	110.111
MT1G	-462.006	53.3744	-17.435	1.12e-53	1.79e-51	110.078
NAAA	-24.988	7.59191	-17.4109	1.46e-53	2.3e-51	109.823
TMCC3	-15.3549	3.93481	-17.3978	1.68e-53	2.63e-51	109.683
GPR15	-10.2992	1.02963	-17.3772	2.11e-53	3.26e-51	109.465
MOGAT2	-33.0493	5.45211	-17.3359	3.31e-53	5.07e-51	109.027
TMEM100	-2.62543	0.3308	-17.2631	7.33e-53	1.11e-50	108.254
GLTP	-24.9463	14.6069	-17.0397	8.35e-52	1.25e-49	105.89
CLDN8	-19.9536	1.10393	-16.9562	2.07e-51	3.07e-49	105.009
ZG16	-330.726	25.3001	-16.8315	7.99e-51	1.18e-48	103.695
MIER3	-17.3342	6.3306	-16.7867	1.3e-50	1.89e-48	103.223
GPT	-31.6598	4.65278	-16.615	8.3e-50	1.2e-47	101.418
TMEM220	-7.82109	0.925137	-16.6072	9.04e-50	1.29e-47	101.336
AKR1B10	-90.8595	11.5402	-16.5079	2.64e-49	3.74e-47	100.295
SCIN	-9.27964	1.52865	-16.5053	2.71e-49	3.81e-47	100.268
AC103563.1	-14.2584	1.06258	-16.4991	2.9e-49	4.03e-47	100.203
CD177P1	-5.57557	0.165454	-16.4984	2.92e-49	4.03e-47	100.196
BTNL3	-38.8744	6.17226	-16.4836	3.43e-49	4.68e-47	100.041
IGHA2	-7378.44	717.533	-16.4047	8.01e-49	1.08e-46	99.2148
ACOX1	-28.1698	12.7929	-16.3709	1.15e-48	1.55e-46	98.8619
CNNM2	-2.28891	1.05786	-16.3216	1.96e-48	2.6e-46	98.3463
PDK4	-27.0052	4.56018	-16.3094	2.23e-48	2.94e-46	98.2195
LYPD8	-178.609	18.2987	-16.2788	3.1e-48	4.05e-46	97.8999
NR5A2	-6.04837	1.59707	-16.2336	5.03e-48	6.52e-46	97.4283
MALL	-16.5189	3.73315	-16.0929	2.27e-47	2.92e-45	95.9629
P2RY1	-5.22627	1.27213	-16.0916	2.3e-47	2.93e-45	95.9497
PBLD	-19.3551	4.54806	-16.0888	2.37e-47	2.99e-45	95.9208
METTL7A	-42.7438	11.9205	-16.0301	4.44e-47	5.56e-45	95.3113
FGL2	-23.5663	4.97242	-16.0071	5.67e-47	7.05e-45	95.0718
PLCL2	-6.35485	1.39714	-15.9721	8.24e-47	1.02e-44	94.7088
HPGDS	-2.27572	0.393746	-15.9151	1.51e-46	1.85e-44	94.1183
RNF152	-3.90483	0.674857	-15.759	7.96e-46	9.65e-44	92.5031
SELENOP	-122.047	15.2934	-15.7347	1.03e-45	1.24e-43	92.2517
STBD1	-2.67329	1.0679	-15.6912	1.63e-45	1.95e-43	91.8031
IGKV3OR2-268	-13.0751	1.26693	-15.6625	2.21e-45	2.62e-43	91.5075
TMEM171	-43.3394	10.9002	-15.6524	2.46e-45	2.9e-43	91.4034
DNASE1L3	-8.67589	1.1711	-15.5983	4.37e-45	5.1e-43	90.8454
ZZEF1	-11.4292	4.51809	-15.5746	5.62e-45	6.5e-43	90.602
RDH5	-2.55171	0.712592	-15.5503	7.26e-45	8.34e-43	90.352
TTC22	-13.3839	5.55547	-15.4881	1.4e-44	1.6e-42	89.7132
ZNF575	-3.43848	1.11938	-15.4689	1.72e-44	1.94e-42	89.5154
LRRN2	-5.53356	0.739475	-15.4658	1.77e-44	1.99e-42	89.4842
TRANK1	-11.3403	3.0746	-15.4546	2e-44	2.23e-42	89.3685
MT1F	-37.7196	5.79166	-15.4154	3.02e-44	3.34e-42	88.9665
NKX2-3	-7.79855	1.82032	-15.3925	3.84e-44	4.22e-42	88.7316
HSD11B2	-183.144	51.719	-15.3909	3.91e-44	4.26e-42	88.7157
CHAD	-4.38852	0.718411	-15.3897	3.95e-44	4.28e-42	88.7036
SLC25A23	-32.7796	15.6271	-15.3514	5.92e-44	6.36e-42	88.3112
HRASLS2	-16.4597	1.96923	-15.3153	8.65e-44	9.24e-42	87.942
SDCBP2	-91.6702	20.6929	-15.3067	9.47e-44	1e-41	87.8533
PLPP1	-31.3338	12.4671	-15.2267	2.19e-43	2.31e-41	87.0364
GPAT3	-10.5591	2.38662	-15.1843	3.42e-43	3.58e-41	86.6033
B3GALT1	-2.41365	0.364535	-15.1492	4.94e-43	5.14e-41	86.2457
TNFRSF17	-10.7537	1.55924	-15.1391	5.49e-43	5.67e-41	86.1431
CDHR5	-191.475	36.6292	-15.0815	1e-42	1.03e-40	85.557
TEF	-9.06234	3.93529	-15.0752	1.07e-42	1.09e-40	85.4926
SCNN1B	-19.9294	2.361	-15.0654	1.19e-42	1.2e-40	85.3923
CASP7	-43.0765	19.9155	-15.049	1.41e-42	1.42e-40	85.2261
PLCE1	-5.83032	2.12476	-15.0455	1.46e-42	1.46e-40	85.1908
CADM3	-4.29026	0.371924	-15.0258	1.8e-42	1.78e-40	84.9902
RMDN2	-2.36657	0.889798	-15.0196	1.92e-42	1.89e-40	84.9273
PAPSS2	-69.8124	22.8266	-14.9776	2.97e-42	2.91e-40	84.5004
TLR3	-5.00296	1.52999	-14.9533	3.83e-42	3.72e-40	84.2544
PTPRH	-36.5869	10.9946	-14.938	4.49e-42	4.34e-40	84.0987
C11orf86	-31.5079	2.91852	-14.8507	1.11e-41	1.07e-39	83.2154
B4GALNT2	-21.9258	1.54911	-14.7956	1.97e-41	1.88e-39	82.6584
ZBTB7B	-38.4564	20.5843	-14.7523	3.09e-41	2.93e-39	82.221
GBA3	-17.8273	0.611247	-14.7499	3.17e-41	2.98e-39	82.1974
CEACAM1	-172.879	45.0993	-14.7458	3.31e-41	3.1e-39	82.1553
WDR78	-1.82558	0.489846	-14.6833	6.32e-41	5.88e-39	81.5251
GRAMD2B	-8.02277	4.19886	-14.673	7.03e-41	6.5e-39	81.4221
CNNM4	-33.4223	16.8599	-14.6637	7.74e-41	7.11e-39	81.3283
MYO1A	-74.9534	19.2899	-14.4628	6.15e-40	5.62e-38	79.3115
SULT1B1	-44.9897	8.67535	-14.4581	6.46e-40	5.86e-38	79.264
TDP2	-83.3529	32.3395	-14.449	7.09e-40	6.4e-38	79.1728
C1orf210	-32.9468	16.4415	-14.41	1.06e-39	9.5e-38	78.7828
EPB41L3	-8.55793	1.61033	-14.2916	3.56e-39	3.18e-37	77.6015
CNTFR	-12.2932	0.99099	-14.2457	5.7e-39	5.05e-37	77.1442
SGK1	-21.5115	4.38546	-14.2093	8.26e-39	7.28e-37	76.7828
SPPL2A	-14.5122	7.71348	-14.2017	8.93e-39	7.83e-37	76.707
UGT2B15	-18.9826	2.2574	-14.1821	1.09e-38	9.51e-37	76.512
ANK3	-2.29744	0.92963	-14.16	1.37e-38	1.18e-36	76.2928
CHP1	-77.1987	41.046	-14.1319	1.82e-38	1.57e-36	76.0145
ZER1	-19.5283	13.1452	-14.1301	1.85e-38	1.59e-36	75.9969
TMEM238L	-34.5651	13.5396	-13.8758	2.45e-37	2.09e-35	73.4841
FMO5	-11.1138	3.03628	-13.8257	4.06e-37	3.44e-35	72.992
ITM2C	-671.145	205.642	-13.7971	5.41e-37	4.56e-35	72.7117
TRIM40	-5.44854	0.878015	-13.7936	5.61e-37	4.7e-35	72.6773
C4orf19	-14.9126	6.51026	-13.7808	6.38e-37	5.32e-35	72.5511
TNXB	-5.12605	0.602137	-13.7788	6.52e-37	5.4e-35	72.5312
MEP1A	-231.97	42.7167	-13.754	8.36e-37	6.89e-35	72.289
CDC14A	-3.30319	1.24857	-13.7053	1.36e-36	1.12e-34	71.8116
ARL14	-29.32	7.03027	-13.6378	2.69e-36	2.19e-34	71.1518
SEMA6A	-9.48155	2.41694	-13.6277	2.97e-36	2.41e-34	71.0534
SULT1A1	-10.2045	2.43739	-13.5869	4.48e-36	3.61e-34	70.6548
GREM2	-9.39412	1.09911	-13.5505	6.44e-36	5.17e-34	70.3008
2021-03-08	-7.73232	4.55653	-13.527	8.15e-36	6.5e-34	70.0718
PCK1	-54.0581	8.43636	-13.4729	1.4e-35	1.11e-33	69.5465
PAQR5	-9.54494	3.35718	-13.4565	1.65e-35	1.3e-33	69.3873
MXI1	-16.8823	9.3765	-13.374	3.74e-35	2.94e-33	68.5878
C15orf48	-331.189	89.486	-13.3702	3.89e-35	3.04e-33	68.5509
LGALS4	-1257.2	472.762	-13.3595	4.33e-35	3.36e-33	68.4469
MT1X	-44.2672	11.3299	-13.3458	4.95e-35	3.83e-33	68.3148
HPGD	-36.573	6.52382	-13.3405	5.22e-35	4.02e-33	68.2633
ACAA2	-57.4276	24.2071	-13.3195	6.43e-35	4.93e-33	68.0603
LGALS9C	-5.74016	0.820776	-13.2823	9.3e-35	7.08e-33	67.702
ABHD3	-20.3447	8.13864	-13.2227	1.68e-34	1.27e-32	67.1273
CPT2	-15.8327	10.4266	-13.202	2.06e-34	1.55e-32	66.9285
SMPD1	-27.5705	10.9438	-13.2006	2.09e-34	1.57e-32	66.9151
TSPAN1	-550.16	147.251	-13.1204	4.6e-34	3.44e-32	66.1445
KRT20	-944.359	175.285	-13.0792	6.91e-34	5.13e-32	65.7497
BEST2	-9.44161	1.30956	-13.0528	8.95e-34	6.62e-32	65.497
FMO4	-3.39157	1.41494	-13.0242	1.19e-33	8.73e-32	65.2237
RHOU	-17.1443	7.84673	-12.9987	1.52e-33	1.12e-31	64.9798
PXMP2	-20.2254	11.3192	-12.9966	1.55e-33	1.13e-31	64.9603
TUBAL3	-19.7354	4.12485	-12.9827	1.78e-33	1.29e-31	64.8279
GPD1L	-20.7786	12.1495	-12.9491	2.48e-33	1.79e-31	64.5067
ISX	-26.4476	7.00929	-12.9358	2.82e-33	2.03e-31	64.3808
ENDOD1	-20.8396	11.4123	-12.9216	3.24e-33	2.32e-31	64.2452
PINK1	-9.04528	5.02098	-12.9178	3.36e-33	2.39e-31	64.209
ATP1A2	-4.77111	0.349962	-12.8806	4.83e-33	3.43e-31	63.8555
MAL	-2.69607	0.393307	-12.8792	4.9e-33	3.46e-31	63.8421
CITED2	-23.5496	11.2232	-12.8411	7.11e-33	4.99e-31	63.4804
SUGCT	-3.57176	1.00361	-12.8395	7.22e-33	5.04e-31	63.465
KIAA1211	-7.04907	2.03729	-12.7933	1.13e-32	7.87e-31	63.027
PRDX6	-123.368	81.654	-12.7898	1.17e-32	8.11e-31	62.994
HMOX1	-31.7199	12.4932	-12.7852	1.22e-32	8.44e-31	62.9504
CLIC5	-21.8329	6.35553	-12.7685	1.44e-32	9.89e-31	62.7919
PTGDR2	-2.78379	0.665232	-12.7635	1.51e-32	1.03e-30	62.7453
FBLIM1	-26.3624	19.4057	-12.7268	2.16e-32	1.47e-30	62.3981
HADHA	-70.7822	68.5527	-12.6832	3.3e-32	2.23e-30	61.9868
PRIMA1	-3.56246	0.299478	-12.6152	6.37e-32	4.29e-30	61.3458
KIAA0513	-5.09796	1.84017	-12.6031	7.15e-32	4.8e-30	61.2329
ANPEP	-630.22	36.2393	-12.5886	8.23e-32	5.5e-30	61.0959
PCSK5	-5.22994	1.09238	-12.5537	1.15e-31	7.66e-30	60.7691
FAM107A	-3.11256	0.590959	-12.5457	1.24e-31	8.24e-30	60.6939
ADCY9	-4.73171	2.56851	-12.4979	1.97e-31	1.3e-29	60.2462
SLC25A20	-19.7984	11.2213	-12.4542	3e-31	1.97e-29	59.8368
CD209	-6.46045	1.54987	-12.4456	3.26e-31	2.13e-29	59.7567
SLC20A1	-20.5785	11.6981	-12.3541	7.82e-31	5.09e-29	58.9042
CES3	-30.8326	8.99266	-12.3486	8.24e-31	5.33e-29	58.8533
MAOA	-73.4779	23.3841	-12.3483	8.27e-31	5.33e-29	58.85
ARHGAP44	-6.85713	2.21637	-12.3349	9.4e-31	6.04e-29	58.7251
FLVCR2	-4.15218	1.27509	-12.3217	1.07e-30	6.82e-29	58.6028
DHRS9	-43.2506	5.04678	-12.3181	1.1e-30	7.03e-29	58.5691
ASAP3	-6.51053	2.62836	-12.3145	1.14e-30	7.24e-29	58.5356
IGHV3OR16-6	-3.88757	0.504959	-12.2762	1.64e-30	1.04e-28	58.1805
CA12	-60.5725	17.4403	-12.268	1.78e-30	1.12e-28	58.1049
HRCT1	-31.2159	7.45605	-12.2485	2.14e-30	1.34e-28	57.9243
ALPI	-33.6647	1.41004	-12.178	4.18e-30	2.61e-28	57.2718
FABP1	-970.183	186.463	-12.1703	4.5e-30	2.8e-28	57.2006
BCAS1	-22.8563	5.58294	-12.1298	6.6e-30	4.08e-28	56.8279
TST	-164.035	85.1498	-12.1249	6.91e-30	4.26e-28	56.7829
MOB3B	-8.35465	4.59452	-12.058	1.3e-29	7.99e-28	56.1668
CMBL	-62.6935	24.2402	-12.0335	1.64e-29	1e-27	55.942
TESK2	-3.56879	2.31284	-11.9787	2.74e-29	1.67e-27	55.4405
MT2A	-201.053	50.8945	-11.9352	4.13e-29	2.51e-27	55.0425
CES2	-146.801	42.4292	-11.8863	6.53e-29	3.95e-27	54.5968
GPA33	-234.105	88.9216	-11.8789	7e-29	4.21e-27	54.5294
EIF4E3	-5.15189	2.05062	-11.8775	7.09e-29	4.25e-27	54.5166
UBE2FP1	-3.03136	1.20141	-11.8618	8.21e-29	4.9e-27	54.374
MPEG1	-19.2718	5.83635	-11.8139	1.29e-28	7.64e-27	53.938
CLEC10A	-6.26441	1.2939	-11.7624	2.08e-28	1.23e-26	53.471
AOC1	-167.17	63.3399	-11.7486	2.36e-28	1.39e-26	53.3459
RBKS	-2.39855	1.32033	-11.7072	3.47e-28	2.04e-26	52.9718
GNG7	-2.78886	0.698933	-11.6977	3.79e-28	2.22e-26	52.886
LILRB5	-1.92107	0.475448	-11.6797	4.48e-28	2.61e-26	52.7235
MXD1	-29.4651	10.6808	-11.6517	5.8e-28	3.37e-26	52.4713
DPT	-34.8326	5.03236	-11.6487	5.96e-28	3.45e-26	52.4443
SQOR	-56.046	29.5121	-11.6335	6.86e-28	3.96e-26	52.3072
TCN2	-21.4196	7.63639	-11.622	7.63e-28	4.38e-26	52.2041
DHDDS	-8.22105	7.03578	-11.6053	8.91e-28	5.1e-26	52.0533
CGN	-33.8084	19.4216	-11.5848	1.08e-27	6.13e-26	51.8699
RBM47	-25.3205	18.6476	-11.4724	3.03e-27	1.72e-25	50.8634
RIOK3	-26.7668	14.1797	-11.4025	5.74e-27	3.25e-25	50.2403
ADH1B	-15.081	1.2941	-11.3878	6.57e-27	3.7e-25	50.1097
XDH	-21.5976	4.55121	-11.3743	7.43e-27	4.17e-25	49.9897
CHGA	-92.7989	6.43675	-11.3699	7.74e-27	4.33e-25	49.95
IGSF9	-9.49253	3.78299	-11.3661	8.01e-27	4.46e-25	49.9163
SUCLG2	-61.193	40.7095	-11.3654	8.06e-27	4.48e-25	49.9102
IRF4	-4.96232	0.951511	-11.3465	9.57e-27	5.3e-25	49.7429
MARVELD3	-8.65145	6.10048	-11.3411	1.01e-26	5.55e-25	49.6944
CIPC	-6.42825	5.45908	-11.3394	1.02e-26	5.61e-25	49.6792
LYVE1	-8.79427	1.01224	-11.3348	1.06e-26	5.83e-25	49.6391
ATP8B1	-52.8701	27.3381	-11.3313	1.1e-26	6e-25	49.6081
CDHR2	-62.4702	10.0232	-11.3305	1.11e-26	6.02e-25	49.6003
SLC2A13	-3.17363	1.39407	-11.3023	1.43e-26	7.75e-25	49.351
PDE9A	-15.3317	4.51307	-11.2918	1.58e-26	8.5e-25	49.2578
SLCO2A1	-16.0152	5.15222	-11.2309	2.74e-26	1.47e-24	48.7204
MT1H	-85.1555	6.28303	-11.2136	3.2e-26	1.72e-24	48.5677
SYNPO	-15.0553	6.82483	-11.2113	3.27e-26	1.75e-24	48.5475
PLS1	-67.2456	36.9716	-11.1869	4.08e-26	2.17e-24	48.3322
TMEM35A	-3.43323	0.562942	-11.1643	5e-26	2.65e-24	48.134
MMP28	-15.5474	3.33978	-11.1569	5.35e-26	2.83e-24	48.0686
TMEM127	-16.3346	18.3232	-11.1409	6.18e-26	3.25e-24	47.9281
SLC1A1	-18.2099	4.92097	-11.1211	7.38e-26	3.87e-24	47.7548
BCHE	-3.89844	0.338796	-11.1163	7.71e-26	4.03e-24	47.7129
LRRC66	-5.99374	2.21553	-11.0932	9.49e-26	4.95e-24	47.5102
IGHV3OR16-9	-6.28715	0.939529	-11.0911	9.67e-26	5.02e-24	47.4919
HADHB	-27.8716	26.4771	-11.0491	1.41e-25	7.3e-24	47.1245
CCDC68	-7.88699	2.49106	-11.0362	1.58e-25	8.17e-24	47.0124
MPZ	-2.44002	0.603261	-11.0285	1.7e-25	8.73e-24	46.9447
SLC23A3	-2.27212	0.540154	-11.0129	1.95e-25	1e-23	46.8086
NR1H4	-6.5912	0.453811	-10.9929	2.34e-25	1.19e-23	46.6344
CPM	-8.32056	2.36254	-10.9684	2.91e-25	1.48e-23	46.4217
UGDH	-36.6625	18.9002	-10.9643	3.02e-25	1.53e-23	46.3856
CAPN5	-47.67	27.6521	-10.9359	3.89e-25	1.96e-23	46.1391
ETHE1	-191.512	90.3994	-10.9011	5.3e-25	2.67e-23	45.8371
SLC41A2	-7.92237	3.74602	-10.8929	5.7e-25	2.86e-23	45.7663
NAALADL1	-22.1336	1.46669	-10.8811	6.33e-25	3.17e-23	45.664
B3GNT7	-59.6762	11.0479	-10.8436	8.84e-25	4.41e-23	45.3398
FABP2	-32.8057	3.69331	-10.8408	9.06e-25	4.5e-23	45.3158
NBPF1	-1.85093	1.05723	-10.7781	1.58e-24	7.82e-23	44.7755
C5orf30	-11.4512	7.79416	-10.7758	1.61e-24	7.96e-23	44.7559
PLAC9	-5.16082	1.56525	-10.7678	1.73e-24	8.51e-23	44.6875
IGKV1OR2-108	-37.1827	5.02112	-10.7632	1.8e-24	8.84e-23	44.6473
ABHD5	-5.77719	4.23361	-10.7601	1.85e-24	9.05e-23	44.6209
MT1DP	-3.77839	0.871514	-10.7439	2.14e-24	1.04e-22	44.4817
SST	-19.5308	1.26726	-10.7285	2.45e-24	1.19e-22	44.3498
PGM1	-31.5937	18.0846	-10.7257	2.51e-24	1.21e-22	44.3257
RNU6-140P	-2.41459	0.486571	-10.7121	2.83e-24	1.37e-22	44.2089
OPN3	-3.89968	2.14798	-10.7088	2.91e-24	1.4e-22	44.1808
IGHV3-74	-226.221	35.6155	-10.7079	2.93e-24	1.41e-22	44.1734
IGKV1-12	-19.347	2.20846	-10.6843	3.61e-24	1.73e-22	43.9712
PTGS1	-10.7698	3.08496	-10.6553	4.66e-24	2.22e-22	43.7234
LPCAT3	-7.09876	4.73121	-10.6331	5.66e-24	2.69e-22	43.5337
NTN1	-3.47696	0.893075	-10.62	6.35e-24	3.01e-22	43.4223
TCF21	-2.61613	0.946344	-10.6024	7.4e-24	3.5e-22	43.2723
AP3S2	-3.10003	2.70936	-10.5852	8.61e-24	4.05e-22	43.126
CCNYL1	-7.01895	4.97887	-10.5763	9.31e-24	4.37e-22	43.05
PTPN21	-3.30269	2.20706	-10.576	9.33e-24	4.37e-22	43.0474
STYK1	-6.96957	3.06302	-10.5428	1.25e-23	5.82e-22	42.7656
BMP2	-13.0578	5.06563	-10.5259	1.44e-23	6.72e-22	42.6225
B3GALT5	-12.5117	2.38272	-10.4754	2.24e-23	1.04e-21	42.1954
IGHV3-72	-105.809	16.949	-10.459	2.59e-23	1.2e-21	42.0562
MEP1B	-43.4049	1.08659	-10.4452	2.91e-23	1.34e-21	41.9401
TENT5C	-14.4789	4.82276	-10.3913	4.65e-23	2.13e-21	41.4863
GGT6	-53.8685	22.691	-10.3504	6.61e-23	3.03e-21	41.143
CCDC69	-13.5617	4.00593	-10.3254	8.2e-23	3.75e-21	40.9338
HSD17B11	-73.6741	45.1177	-10.2958	1.06e-22	4.82e-21	40.6856
MTM1	-8.18472	5.42613	-10.285	1.16e-22	5.27e-21	40.5954
BMP5	-2.29235	0.563296	-10.2755	1.26e-22	5.7e-21	40.5167
PACSIN2	-21.6936	21.6355	-10.2733	1.28e-22	5.8e-21	40.4977
EDIL3	-10.5497	4.12801	-10.2602	1.44e-22	6.46e-21	40.3887
SLC35G1	-2.78655	1.6168	-10.2564	1.48e-22	6.66e-21	40.3574
MGLL	-28.4979	17.1953	-10.2327	1.82e-22	8.13e-21	40.1596
VIPR1	-11.4542	5.32298	-10.2256	1.93e-22	8.62e-21	40.1006
SPECC1L	-3.61699	3.68776	-10.2167	2.08e-22	9.27e-21	40.0267
VSIG2	-96.0257	21.0244	-10.2156	2.1e-22	9.33e-21	40.0177
ST6GALNAC6	-29.0331	8.05932	-10.2048	2.31e-22	1.02e-20	39.9275
MYORG	-19.6113	13.274	-10.1859	2.71e-22	1.2e-20	39.7712
ANO10	-10.3276	8.68607	-10.1754	2.97e-22	1.3e-20	39.6835
B3GNT8	-25.5871	13.0216	-10.1507	3.66e-22	1.61e-20	39.4788
B3GALT4	-8.25383	4.77891	-10.147	3.78e-22	1.65e-20	39.4481
P2RY14	-3.15318	0.844303	-10.1455	3.83e-22	1.67e-20	39.4363
CCL15-CCL14	-2.07996	0.659073	-10.1256	4.53e-22	1.97e-20	39.2712
MGAT4A	-10.6336	6.52672	-10.1249	4.56e-22	1.97e-20	39.2661
IGHV3-76	-3.40266	0.506182	-10.1209	4.72e-22	2.04e-20	39.2326
NXPE4	-67.6317	14.5885	-10.114	5e-22	2.16e-20	39.1754
IGHV2-5	-46.9471	6.50334	-10.1022	5.53e-22	2.38e-20	39.0781
PPP2R3A	-2.41355	0.983871	-10.0932	5.97e-22	2.56e-20	39.0042
HIGD1A	-59.43	35.4041	-10.0884	6.21e-22	2.65e-20	38.9648
NEURL1B	-16.1242	9.3388	-10.0861	6.34e-22	2.7e-20	38.9452
RILP	-11.6448	5.80944	-10.0538	8.34e-22	3.54e-20	38.6793
TLCD2	-5.9811	3.13755	-10.0498	8.62e-22	3.65e-20	38.6469
C7orf31	-2.72887	1.38132	-10.0483	8.73e-22	3.69e-20	38.6345
JOSD1	-19.6789	19.6429	-10.0411	9.28e-22	3.91e-20	38.5752
DSC2	-17.0284	8.96908	-10.0325	9.98e-22	4.19e-20	38.5046
PLCD3	-32.7432	16.1372	-10.0303	1.02e-21	4.26e-20	38.4862
CPT1A	-30.0023	22.9893	-10.0207	1.1e-21	4.61e-20	38.4075
MT1E	-162.907	39.4788	-10.0151	1.16e-21	4.82e-20	38.3612
C16orf89	-3.27971	0.509633	-9.98952	1.43e-21	5.96e-20	38.1518
SLC44A4	-162.308	90.3844	-9.9665	1.74e-21	7.21e-20	37.9633
KAT2B	-4.89973	2.15499	-9.96564	1.75e-21	7.25e-20	37.9563
FAM129A	-8.9009	1.88886	-9.95957	1.85e-21	7.61e-20	37.9067
SFRP1	-7.60254	0.841113	-9.92424	2.48e-21	1.02e-19	37.6182
CROT	-4.73624	2.91686	-9.90777	2.85e-21	1.17e-19	37.4839
HSD3B2	-12.5329	0.435338	-9.87924	3.62e-21	1.48e-19	37.2517
PPP1R14D	-93.015	45.2382	-9.86578	4.05e-21	1.65e-19	37.1423
ASB2	-3.81746	0.934213	-9.86211	4.18e-21	1.7e-19	37.1125
ITGA8	-1.5511	0.621397	-9.83983	5.03e-21	2.04e-19	36.9318
PDE8A	-6.33654	5.11325	-9.8374	5.14e-21	2.08e-19	36.912
SLC9A1	-18.7243	12.078	-9.83103	5.42e-21	2.18e-19	36.8604
DISP2	-1.58397	0.438888	-9.8247	5.71e-21	2.3e-19	36.8091
LRRC1	-9.26507	8.65973	-9.81779	6.05e-21	2.43e-19	36.7532
SLC22A4	-3.62537	1.05511	-9.79872	7.09e-21	2.84e-19	36.5988
SCUBE2	-2.26868	0.631769	-9.79664	7.21e-21	2.88e-19	36.582
CPNE5	-4.37001	1.55508	-9.78269	8.1e-21	3.22e-19	36.4693
SLC9A3R1	-87.2961	55.1571	-9.76037	9.75e-21	3.87e-19	36.2891
CYB561A3	-3.34015	3.64963	-9.74968	1.07e-20	4.22e-19	36.2029
FAM151A	-4.89438	0.75584	-9.73886	1.17e-20	4.6e-19	36.1157
ARRDC4	-13.9135	7.28193	-9.69982	1.61e-20	6.33e-19	35.8018
SIAE	-20.6718	11.9587	-9.69981	1.61e-20	6.33e-19	35.8017
THRB	-2.99465	0.90866	-9.69862	1.63e-20	6.37e-19	35.7921
IGKV3-7	-17.9426	3.04891	-9.69556	1.67e-20	6.52e-19	35.7676
HMGCS2	-391.783	90.0198	-9.68965	1.75e-20	6.83e-19	35.7201
LITAF	-37.2977	30.9349	-9.67641	1.95e-20	7.6e-19	35.6139
ACO2	-37.4583	31.6096	-9.63881	2.66e-20	1.03e-18	35.3129
SLC23A1	-10.1093	0.940391	-9.61163	3.33e-20	1.29e-18	35.0957
STPG1	-1.48888	1.22879	-9.578	4.39e-20	1.69e-18	34.8277
PTN	-5.7155	1.62065	-9.54868	5.58e-20	2.15e-18	34.5945
CD101	-1.16322	0.583173	-9.53982	6e-20	2.3e-18	34.5241
HMCN2	-2.72149	0.757105	-9.53674	6.15e-20	2.36e-18	34.4996
P2RX4	-7.40784	5.21732	-9.52311	6.88e-20	2.63e-18	34.3915
MOCS1	-4.36394	1.90077	-9.50356	8.07e-20	3.07e-18	34.2365
SCAMP2	-32.3902	33.3959	-9.48159	9.65e-20	3.67e-18	34.0626
IGKV3-20	-912.862	200.395	-9.47561	1.01e-19	3.84e-18	34.0154
ACAT1	-15.1311	10.4928	-9.46639	1.09e-19	4.13e-18	33.9426
MYH11	-167.129	18.0351	-9.44526	1.3e-19	4.89e-18	33.7759
EPB41L4B	-20.3335	13.5727	-9.41261	1.69e-19	6.36e-18	33.5187
SCP2	-17.4501	15.6704	-9.40616	1.78e-19	6.68e-18	33.4679
CLDN7	-163.555	136.116	-9.3931	1.98e-19	7.41e-18	33.3653
IGKV2D-30	-4.50942	0.471233	-9.37509	2.29e-19	8.55e-18	33.2239
LGALS2	-56.8782	10.1191	-9.37025	2.38e-19	8.86e-18	33.186
ANKRD40CL	-7.70453	3.44306	-9.3564	2.66e-19	9.89e-18	33.0774
SMIM6	-6.89634	2.8888	-9.35442	2.7e-19	1e-17	33.0619
SLC46A3	-16.0824	8.08678	-9.34819	2.84e-19	1.05e-17	33.0131
SESN2	-9.83764	7.3416	-9.34651	2.88e-19	1.06e-17	32.9999
ABI3BP	-2.89729	0.644382	-9.33869	3.07e-19	1.13e-17	32.9387
PTK2B	-10.655	7.1741	-9.31568	3.69e-19	1.36e-17	32.7589
EDN2	-5.49486	0.778324	-9.31385	3.75e-19	1.37e-17	32.7446
TM6SF2	-7.20654	0.533699	-9.29468	4.37e-19	1.6e-17	32.595
CTSG	-4.50773	0.771163	-9.28839	4.6e-19	1.68e-17	32.5459
KLRB1	-4.98199	1.76359	-9.25246	6.13e-19	2.23e-17	32.2664
LPAR1	-5.22683	2.17429	-9.25068	6.22e-19	2.26e-17	32.2525
POLD4	-10.3109	8.7768	-9.24193	6.67e-19	2.42e-17	32.1845
PGM5	-10.4692	1.91025	-9.2299	7.35e-19	2.65e-17	32.0911
UGT2A3	-35.8921	5.34655	-9.22883	7.41e-19	2.67e-17	32.0828
MPND	-15.5995	13.2967	-9.21353	8.37e-19	3.01e-17	31.9642
ZBTB7C	-9.4251	3.00424	-9.20992	8.62e-19	3.09e-17	31.9362
SLC22A23	-7.53493	4.49553	-9.18633	1.04e-18	3.72e-17	31.7536
VILL	-22.6471	10.9263	-9.18522	1.05e-18	3.74e-17	31.745
ACACB	-2.61547	1.44107	-9.18419	1.06e-18	3.77e-17	31.7371
CASP5	-12.7276	4.1245	-9.18148	1.08e-18	3.84e-17	31.7161
TOM1L2	-7.5143	6.41787	-9.17531	1.14e-18	4.02e-17	31.6684
SYNM	-28.3286	3.43122	-9.17383	1.15e-18	4.06e-17	31.657
AMN	-35.0087	12.4712	-9.16491	1.23e-18	4.35e-17	31.5881
APOBEC3B	-10.0684	4.7151	-9.16468	1.24e-18	4.35e-17	31.5863
BDKRB1	-1.37189	0.645179	-9.13489	1.57e-18	5.5e-17	31.3566
CYP2C18	-6.34953	1.28113	-9.12498	1.69e-18	5.93e-17	31.2803
ENHO	-2.16084	0.537633	-9.1068	1.96e-18	6.83e-17	31.1405
CBX7	-4.41869	2.61092	-9.10421	2e-18	6.96e-17	31.1206
EPHX2	-22.5318	10.5335	-9.1038	2e-18	6.97e-17	31.1174
TMEM30B	-17.5053	14.9245	-9.0954	2.14e-18	7.43e-17	31.0529
IQGAP2	-12.7208	5.84567	-9.08503	2.32e-18	8.05e-17	30.9733
ACVRL1	-23.5822	13.2047	-9.07438	2.53e-18	8.73e-17	30.8917
RXRA	-8.24126	7.62851	-9.07309	2.55e-18	8.8e-17	30.8817
IGSF3	-5.05523	3.81451	-9.05487	2.95e-18	1.01e-16	30.7422
CREB3L3	-29.4135	1.00578	-9.05326	2.99e-18	1.02e-16	30.7299
SLC6A19	-32.3347	0.895246	-9.0522	3.01e-18	1.03e-16	30.7217
IGHV1-2	-253.665	38.6865	-9.03815	3.36e-18	1.15e-16	30.6143
PIGCP1	-2.64477	1.68263	-9.02488	3.73e-18	1.27e-16	30.5129
LRRC75A	-9.43661	6.54642	-8.98885	4.96e-18	1.68e-16	30.2381
SMIM14	-19.1698	10.4544	-8.98868	4.96e-18	1.68e-16	30.2369
SRI	-73.9015	42.4309	-8.98475	5.12e-18	1.73e-16	30.2069
RAVER2	-8.42577	7.31279	-8.97974	5.32e-18	1.8e-16	30.1689
CCL23	-1.72845	0.419788	-8.97568	5.5e-18	1.85e-16	30.1379
TJP3	-37.1947	24.978	-8.96994	5.75e-18	1.93e-16	30.0943
GDPD3	-18.3275	5.51715	-8.94755	6.85e-18	2.3e-16	29.9242
NEU4	-8.06784	2.42641	-8.94678	6.89e-18	2.31e-16	29.9184
LGALS9B	-5.37902	1.15812	-8.94538	6.97e-18	2.33e-16	29.9078
SLC9A9	-1.9581	0.752984	-8.94342	7.08e-18	2.36e-16	29.8929
SUSD6	-15.0434	12.3402	-8.92999	7.86e-18	2.61e-16	29.7911
P2RX1	-1.60618	0.559572	-8.91517	8.82e-18	2.93e-16	29.6788
IGHV4-59	-250.5	50.4858	-8.91289	8.98e-18	2.97e-16	29.6615
FHL1	-21.8154	4.76644	-8.89262	1.05e-17	3.47e-16	29.5083
MAF	-10.8416	2.96008	-8.85445	1.42e-17	4.66e-16	29.2204
TMPRSS2	-53.006	34.9129	-8.8343	1.65e-17	5.44e-16	29.0687
ABCD3	-10.3682	9.39352	-8.83274	1.67e-17	5.5e-16	29.057
C7	-16.3697	2.21137	-8.82183	1.82e-17	5.97e-16	28.975
PTGR1	-20.0249	9.01493	-8.81314	1.95e-17	6.37e-16	28.9097
F2RL1	-39.7803	32.4483	-8.81016	1.99e-17	6.49e-16	28.8874
RAB27A	-7.30232	4.74381	-8.81016	1.99e-17	6.49e-16	28.8873
LIMA1	-41.3554	26.4153	-8.80817	2.03e-17	6.58e-16	28.8725
AC034105.1	-5.91338	0.786607	-8.80173	2.13e-17	6.9e-16	28.8242
PLXNA2	-5.782	4.55769	-8.7755	2.61e-17	8.43e-16	28.6277
AL354798.1	-2.21898	0.477448	-8.76955	2.73e-17	8.81e-16	28.5832
RIMKLA	-2.34503	1.37655	-8.76306	2.87e-17	9.24e-16	28.5346
CCL28	-18.8975	6.51216	-8.76252	2.88e-17	9.26e-16	28.5306
ARHGEF37	-4.04959	2.42758	-8.74173	3.38e-17	1.08e-15	28.3753
SLC9A2	-11.0798	3.90287	-8.72722	3.78e-17	1.21e-15	28.2671
PAFAH2	-9.27293	8.25271	-8.72649	3.8e-17	1.21e-15	28.2617
ACSF2	-11.5298	6.43441	-8.68326	5.3e-17	1.69e-15	27.9401
IGLV7-43	-79.5696	14.3888	-8.67553	5.62e-17	1.79e-15	27.8827
CHMP1B	-20.9969	20.6676	-8.6729	5.73e-17	1.82e-15	27.8632
DENND1C	-7.71768	6.60116	-8.65836	6.41e-17	2.03e-15	27.7554
RCAN1	-8.2671	5.54745	-8.65346	6.65e-17	2.1e-15	27.7191
TTLL6	-1.34833	0.451684	-8.64766	6.95e-17	2.19e-15	27.6762
SOWAHB	-6.03121	4.38364	-8.62529	8.25e-17	2.59e-15	27.5108
PRKACB	-17.9843	7.54705	-8.59998	1e-16	3.14e-15	27.324
STIM1	-6.81908	7.85751	-8.59217	1.06e-16	3.32e-15	27.2664
BSG	-223.362	223.518	-8.59179	1.06e-16	3.33e-15	27.2636
TNFSF10	-30.0374	20.1165	-8.5829	1.14e-16	3.55e-15	27.1981
MISP	-195.435	135.283	-8.58042	1.16e-16	3.61e-15	27.1798
CYBRD1	-35.1738	8.74963	-8.5718	1.24e-16	3.85e-15	27.1164
TMEM131	-5.91253	6.36371	-8.55026	1.46e-16	4.52e-15	26.9582
ARHGEF18	-2.13632	1.71233	-8.54485	1.52e-16	4.7e-15	26.9185
AC142381.1	-4.80582	0.907093	-8.5196	1.84e-16	5.68e-15	26.7334
IGHA1	-5966.27	1194.64	-8.51029	1.97e-16	6.08e-15	26.6653
IGHV3-49	-167.163	28.5543	-8.48103	2.46e-16	7.56e-15	26.4515
IGHV3-21	-158.684	36.0992	-8.47973	2.48e-16	7.62e-15	26.4421
CAPN2	-33.5653	27.7277	-8.47498	2.57e-16	7.88e-15	26.4074
GLIPR2	-11.2255	6.4369	-8.46085	2.86e-16	8.75e-15	26.3044
ADCY5	-2.43522	0.601573	-8.45593	2.97e-16	9.06e-15	26.2686
MPP5	-4.10084	3.89356	-8.44843	3.14e-16	9.57e-15	26.214
NCOA4	-40.6905	43.3822	-8.44561	3.21e-16	9.75e-15	26.1935
VIP	-19.3334	3.69929	-8.43484	3.48e-16	1.06e-14	26.1152
CALM1	-41.4416	58.3808	-8.4343	3.49e-16	1.06e-14	26.1113
CXCL12	-14.3103	4.20146	-8.40485	4.36e-16	1.32e-14	25.8976
GNG12	-36.1471	29.5994	-8.39794	4.59e-16	1.38e-14	25.8475
ATP6V0D2	-1.38214	0.437624	-8.3911	4.83e-16	1.45e-14	25.798
KIF13B	-11.5862	7.98121	-8.38467	5.06e-16	1.52e-14	25.7514
BDKRB2	-4.40419	2.89888	-8.38014	5.24e-16	1.57e-14	25.7187
VWA5A	-11.3852	6.48499	-8.37971	5.25e-16	1.57e-14	25.7156
NEDD4L	-5.01125	4.13173	-8.34288	6.91e-16	2.06e-14	25.4497
ARRB1	-7.0623	6.361	-8.34088	7.02e-16	2.09e-14	25.4353
IGKV1D-27	-10.4995	1.22268	-8.31974	8.21e-16	2.44e-14	25.2831
AC136428.1	-4.49286	0.959299	-8.3141	8.56e-16	2.54e-14	25.2425
SLC35D1	-13.3551	10.5367	-8.31328	8.61e-16	2.55e-14	25.2367
MYZAP	-2.49708	1.56267	-8.30414	9.22e-16	2.72e-14	25.171
OCEL1	-9.85089	7.59556	-8.30002	9.5e-16	2.8e-14	25.1414
STK17B	-8.85037	6.05132	-8.29032	1.02e-15	3.01e-14	25.0718
VAT1L	-1.39194	0.570912	-8.28221	1.08e-15	3.19e-14	25.0136
ELMSAN1	-3.66702	3.08019	-8.27066	1.18e-15	3.46e-14	24.9309
GRAMD1C	-1.67789	0.834427	-8.2697	1.19e-15	3.48e-14	24.9241
PNLIPRP2	-15.0825	2.23817	-8.26133	1.27e-15	3.7e-14	24.8641
SHISAL1	-1.62449	0.372996	-8.26004	1.28e-15	3.72e-14	24.8549
KBTBD11-OT1	-1.38734	0.66036	-8.25857	1.29e-15	3.76e-14	24.8444
FRMD3	-3.34972	1.17061	-8.24055	1.47e-15	4.28e-14	24.7157
PEX11A	-4.94144	4.23758	-8.23062	1.59e-15	4.59e-14	24.6448
NPTX1	-3.02693	0.22158	-8.229	1.61e-15	4.64e-14	24.6332
CAB39	-16.324	19.913	-8.22287	1.68e-15	4.84e-14	24.5895
SLC6A9	-7.04779	3.79346	-8.2215	1.7e-15	4.88e-14	24.5798
IGHV3-52	-4.92827	0.974117	-8.21737	1.75e-15	5.02e-14	24.5503
APOBR	-33.2471	14.0547	-8.21645	1.76e-15	5.05e-14	24.5438
PRR5L	-8.2327	7.4057	-8.21485	1.78e-15	5.1e-14	24.5324
PAG1	-6.13479	2.66076	-8.20785	1.88e-15	5.36e-14	24.4825
C10orf99	-237.541	94.7547	-8.18746	2.18e-15	6.21e-14	24.3375
NIPAL1	-6.63345	4.70882	-8.1744	2.4e-15	6.82e-14	24.2448
BMF	-5.66199	3.24226	-8.17155	2.45e-15	6.95e-14	24.2245
GNG2	-3.09218	1.44165	-8.16697	2.53e-15	7.18e-14	24.192
JAML	-2.24414	1.03452	-8.1662	2.55e-15	7.2e-14	24.1866
CLMN	-4.79374	3.53603	-8.15721	2.72e-15	7.68e-14	24.1229
GNA13	-14.4667	13.6062	-8.15178	2.83e-15	7.98e-14	24.0844
BTD	-4.30139	4.32813	-8.14648	2.94e-15	8.28e-14	24.0469
MYO1D	-64.5103	51.916	-8.14604	2.95e-15	8.29e-14	24.0438
MAST2	-12.6594	11.817	-8.14475	2.98e-15	8.35e-14	24.0346
LARGE1	-2.92337	2.3574	-8.13766	3.14e-15	8.78e-14	23.9845
GBP3	-24.3052	12.6488	-8.1281	3.36e-15	9.39e-14	23.9169
SMPD3	-9.9205	5.82285	-8.12346	3.48e-15	9.7e-14	23.8841
SELENBP1	-331.472	104.893	-8.11786	3.63e-15	1.01e-13	23.8446
DCAF11	-10.1557	13.8857	-8.11587	3.68e-15	1.02e-13	23.8306
NHSL1	-7.96659	6.48936	-8.1087	3.88e-15	1.07e-13	23.7799
CCL13	-13.1747	3.09694	-8.10155	4.08e-15	1.13e-13	23.7295
FGFR2	-7.10842	2.31574	-8.10008	4.13e-15	1.14e-13	23.7192
JAM2	-2.5497	0.872101	-8.09298	4.35e-15	1.2e-13	23.6692
IGLV2-8	-140.87	27.6214	-8.0914	4.4e-15	1.21e-13	23.658
FNBP1	-8.81994	5.28377	-8.09112	4.4e-15	1.21e-13	23.6561
ITPKA	-14.8252	6.96356	-8.0412	6.33e-15	1.73e-13	23.3054
PAMR1	-2.5186	1.37951	-8.03991	6.39e-15	1.75e-13	23.2964
MAN1A1	-20.8878	12.8948	-8.0217	7.28e-15	1.99e-13	23.1689
SLC15A1	-15.7924	1.45249	-8.02159	7.29e-15	1.99e-13	23.1682
PRKCB	-1.95761	0.622117	-8.01791	7.49e-15	2.04e-13	23.1424
MARCKS	-51.1271	42.4102	-8.01745	7.51e-15	2.04e-13	23.1392
WASL	-19.785	20.2516	-8.0155	7.62e-15	2.07e-13	23.1256
TAX1BP3	-23.1194	21.4033	-8.01126	7.86e-15	2.13e-13	23.0959
ABCB1	-23.6134	7.73743	-8.00982	7.94e-15	2.15e-13	23.0858
LMOD1	-36.3882	6.8431	-8.00645	8.13e-15	2.19e-13	23.0623
KLF9	-10.0375	4.70526	-7.98407	9.56e-15	2.57e-13	22.9061
AQP11	-3.21401	1.5684	-7.97489	1.02e-14	2.74e-13	22.8422
ABHD6	-4.98012	4.5448	-7.9647	1.1e-14	2.95e-13	22.7713
KIAA1522	-31.4079	33.914	-7.96112	1.13e-14	3.02e-13	22.7464
PTGER4	-11.1612	6.52363	-7.96037	1.13e-14	3.03e-13	22.7412
HAND2	-3.6384	0.643718	-7.95432	1.18e-14	3.16e-13	22.6991
C3orf85	-4.57112	1.36301	-7.95068	1.21e-14	3.24e-13	22.6739
IL10RB	-19.3895	19.8952	-7.9468	1.25e-14	3.32e-13	22.6469
BTBD3	-7.55614	6.4284	-7.94658	1.25e-14	3.32e-13	22.6454
PJA2	-16.3311	13.6116	-7.93856	1.33e-14	3.51e-13	22.5897
SLC3A1	-6.74437	2.27994	-7.93705	1.34e-14	3.54e-13	22.5792
SGK2	-11.1056	5.96245	-7.93649	1.35e-14	3.55e-13	22.5753
VDR	-21.3052	19.0115	-7.93122	1.4e-14	3.68e-13	22.5388
IGHV3OR15-7	-5.23659	1.14534	-7.92203	1.49e-14	3.92e-13	22.4751
SLC25A42	-1.97924	1.6014	-7.92196	1.49e-14	3.92e-13	22.4746
PDCD6IP	-16.2838	21.1272	-7.90443	1.69e-14	4.44e-13	22.3533
CALCOCO2	-9.88007	12.3964	-7.88401	1.96e-14	5.13e-13	22.2122
APOA4	-187.992	4.40832	-7.88146	1.99e-14	5.21e-13	22.1946
CPO	-22.8971	0.612355	-7.87938	2.02e-14	5.28e-13	22.1803
RELL1	-4.9694	2.09297	-7.87901	2.03e-14	5.28e-13	22.1778
APOB	-41.1735	1.01831	-7.87759	2.05e-14	5.33e-13	22.1679
APOC3	-86.2177	2.0835	-7.87182	2.14e-14	5.54e-13	22.1282
APOA1	-344.969	8.38926	-7.87144	2.14e-14	5.55e-13	22.1255
CD1D	-2.29974	1.19742	-7.86615	2.22e-14	5.75e-13	22.0891
PLPP3	-9.26196	6.39252	-7.84714	2.54e-14	6.57e-13	21.9582
TRAF3IP2	-5.53852	6.01122	-7.84132	2.65e-14	6.84e-13	21.9183
PPARGC1A	-2.92931	1.23097	-7.83999	2.68e-14	6.89e-13	21.9091
AQP7	-2.2281	0.617622	-7.83984	2.68e-14	6.89e-13	21.908
FCER1A	-2.07566	0.627649	-7.83669	2.74e-14	7.03e-13	21.8864
FOXF2	-5.97218	2.80579	-7.83181	2.84e-14	7.27e-13	21.8529
CCL8	-5.60681	1.47821	-7.81426	3.21e-14	8.22e-13	21.7325
C2CD2L	-2.36498	2.60276	-7.79213	3.76e-14	9.59e-13	21.581
EGLN1	-6.38133	7.8906	-7.78767	3.88e-14	9.88e-13	21.5505
CNST	-3.62536	4.24424	-7.78679	3.9e-14	9.93e-13	21.5445
NDRG2	-12.7351	10.1414	-7.78588	3.93e-14	9.98e-13	21.5383
EMP1	-39.1298	15.7769	-7.775	4.24e-14	1.08e-12	21.464
TMEM59	-30.2704	32.1392	-7.75571	4.86e-14	1.23e-12	21.3324
ANKRD13A	-5.03981	5.72109	-7.74115	5.38e-14	1.36e-12	21.2333
DYRK2	-8.03675	7.55799	-7.73226	5.73e-14	1.45e-12	21.1728
GGTA1P	-1.6386	0.54772	-7.73055	5.8e-14	1.46e-12	21.1612
STMN2	-8.28537	1.32342	-7.72665	5.96e-14	1.5e-12	21.1347
IGKV1-39	-9.99536	1.66975	-7.71037	6.68e-14	1.68e-12	21.0242
TMIGD3	-1.24546	0.545112	-7.70867	6.76e-14	1.7e-12	21.0126
LEAP2	-1.34933	0.673569	-7.69476	7.46e-14	1.87e-12	20.9184
GSTA1	-72.6062	3.15816	-7.69413	7.49e-14	1.87e-12	20.9141
PDE2A	-1.47451	0.521712	-7.694	7.5e-14	1.87e-12	20.9132
HECTD3	-14.9214	16.8748	-7.69201	7.6e-14	1.89e-12	20.8998
SI	-45.6537	3.44089	-7.6785	8.35e-14	2.08e-12	20.8084
IGKV3D-15	-16.0107	3.14843	-7.67451	8.59e-14	2.13e-12	20.7814
AP001972.5	-6.25316	4.262	-7.67415	8.61e-14	2.13e-12	20.7789
IGKV1-17	-130.482	28.9864	-7.66969	8.89e-14	2.2e-12	20.7488
CPNE8	-2.92035	1.13708	-7.66516	9.17e-14	2.26e-12	20.7182
STAP2	-44.4453	35.5939	-7.66313	9.3e-14	2.29e-12	20.7046
OGN	-7.57771	1.05971	-7.66227	9.36e-14	2.3e-12	20.6987
MGST3	-10.8	12.4696	-7.64874	1.03e-13	2.53e-12	20.6075
CASQ2	-5.21718	0.745688	-7.64411	1.06e-13	2.61e-12	20.5763
MSRA	-3.74729	3.07191	-7.6362	1.12e-13	2.75e-12	20.523
PTPRF	-43.3068	42.3701	-7.61824	1.27e-13	3.11e-12	20.4022
LGR4	-14.3337	11.7144	-7.5946	1.5e-13	3.66e-12	20.2437
PLEKHA7	-4.24054	4.22199	-7.59109	1.54e-13	3.74e-12	20.2201
ENPEP	-16.2154	1.09637	-7.58233	1.63e-13	3.97e-12	20.1614
PIP5K1B	-11.6294	10.156	-7.57366	1.73e-13	4.21e-12	20.1034
PARM1	-57.56	36.9847	-7.56102	1.89e-13	4.59e-12	20.019
PTP4A1	-38.847	35.9787	-7.55224	2.01e-13	4.87e-12	19.9604
MYL9	-240.727	70.321	-7.53793	2.22e-13	5.36e-12	19.865
GALNT12	-21.9938	14.8412	-7.52965	2.35e-13	5.67e-12	19.8098
FAM107B	-10.6305	6.76019	-7.52934	2.35e-13	5.67e-12	19.8077
ANGPTL1	-3.6961	0.551291	-7.52256	2.46e-13	5.93e-12	19.7627
SH3BP1	-9.37661	8.4296	-7.52114	2.49e-13	5.98e-12	19.7532
IGLV5-48	-6.90942	0.61731	-7.52088	2.49e-13	5.98e-12	19.7515
CYP2D6	-10.282	1.00999	-7.51803	2.54e-13	6.09e-12	19.7325
TMEM120A	-25.7668	22.6601	-7.51687	2.56e-13	6.13e-12	19.7248
TRIM36	-2.43004	1.39413	-7.51636	2.57e-13	6.14e-12	19.7214
BMX	-2.08352	0.596089	-7.51454	2.6e-13	6.21e-12	19.7093
HADH	-38.6191	38.2007	-7.5118	2.65e-13	6.32e-12	19.6911
BCAR3	-5.95594	3.88474	-7.50788	2.73e-13	6.48e-12	19.6651
IGHV3OR16-8	-5.20371	1.09486	-7.50661	2.75e-13	6.53e-12	19.6567
GNAO1	-2.17383	0.424821	-7.50292	2.82e-13	6.68e-12	19.6322
SHROOM3	-11.453	10.1493	-7.49911	2.9e-13	6.85e-12	19.6068
MS4A8	-19.2334	3.68722	-7.48104	3.28e-13	7.74e-12	19.4871
PDZK1	-4.61736	0.602827	-7.47841	3.34e-13	7.87e-12	19.4697
EPAS1	-24.3833	20.1454	-7.47529	3.41e-13	8.03e-12	19.449
PAQR8	-29.9673	18.1001	-7.46707	3.61e-13	8.48e-12	19.3946
SOS2	-5.43207	5.18891	-7.44854	4.09e-13	9.61e-12	19.2722
MVP	-69.2743	73.1925	-7.44206	4.28e-13	1e-11	19.2295
CAVIN2	-9.1132	2.38426	-7.43101	4.61e-13	1.08e-11	19.1567
SIDT2	-5.14344	4.96021	-7.43007	4.64e-13	1.08e-11	19.1505
MB	-5.68187	1.61669	-7.41515	5.14e-13	1.2e-11	19.0523
GCNT3	-54.8249	17.125	-7.40325	5.57e-13	1.3e-11	18.9741
TMEM56	-6.89501	3.63496	-7.40186	5.63e-13	1.31e-11	18.965
TRAK2	-5.74201	6.52242	-7.4002	5.69e-13	1.32e-11	18.9541
GSN	-57.9671	31.7968	-7.39516	5.89e-13	1.37e-11	18.921
SOWAHA	-12.5556	5.85586	-7.39199	6.02e-13	1.39e-11	18.9002
TREH	-6.91448	0.780416	-7.39155	6.04e-13	1.39e-11	18.8973
ALDOB	-568.525	30.1561	-7.38587	6.27e-13	1.45e-11	18.8601
PI16	-6.70927	0.716868	-7.385	6.31e-13	1.45e-11	18.8543
IGLV2-14	-428.646	125.127	-7.38288	6.4e-13	1.47e-11	18.8405
TCP11L1	-1.53953	1.35178	-7.3791	6.57e-13	1.51e-11	18.8157
TCEA3	-27.0007	17.3243	-7.37649	6.68e-13	1.53e-11	18.7986
DAAM2	-2.22291	1.14399	-7.36937	7.01e-13	1.61e-11	18.752
NAT2	-9.39664	4.21092	-7.36759	7.1e-13	1.62e-11	18.7403
MYLK	-18.9775	4.93171	-7.35374	7.8e-13	1.78e-11	18.6498
KCTD9	-7.34228	5.76887	-7.33715	8.72e-13	1.99e-11	18.5416
PSEN1	-6.93216	10.1076	-7.33427	8.89e-13	2.02e-11	18.5228
AGFG2	-8.97341	8.16088	-7.32793	9.28e-13	2.11e-11	18.4815
KBTBD11	-6.70456	5.00461	-7.32665	9.36e-13	2.13e-11	18.4732
ZFYVE28	-1.90368	1.3505	-7.32632	9.38e-13	2.13e-11	18.471
CYP3A4	-35.0625	1.13075	-7.31987	9.8e-13	2.22e-11	18.429
IGKV1-27	-103.732	23.5657	-7.31311	1.03e-12	2.32e-11	18.385
TNIP1	-22.0596	31.316	-7.30329	1.1e-12	2.47e-11	18.3212
VPS4B	-13.7086	14.3224	-7.2912	1.19e-12	2.68e-11	18.2427
HK2	-40.5488	27.3581	-7.28921	1.2e-12	2.71e-11	18.2298
FRMD1	-4.71792	1.97805	-7.28578	1.23e-12	2.77e-11	18.2076
LYNX1	-1.58316	0.486995	-7.28567	1.23e-12	2.77e-11	18.2069
PPM1A	-4.50694	5.057	-7.28184	1.27e-12	2.83e-11	18.182
SLC7A9	-20.9168	0.917095	-7.27816	1.3e-12	2.9e-11	18.1582
TMEM140	-7.68565	6.61802	-7.27488	1.33e-12	2.96e-11	18.1369
CAPN13	-3.83406	1.74712	-7.26429	1.42e-12	3.17e-11	18.0684
MPC1	-25.5016	23.0681	-7.25243	1.54e-12	3.43e-11	17.9918
PLSCR4	-5.34881	3.73874	-7.24006	1.67e-12	3.72e-11	17.9119
PIGZ	-20.0297	10.6334	-7.23478	1.73e-12	3.85e-11	17.8779
ACADM	-11.0007	8.44602	-7.23253	1.76e-12	3.9e-11	17.8634
RNF185	-4.89718	7.86337	-7.22671	1.83e-12	4.05e-11	17.8259
PCK2	-35.8439	27.8094	-7.21255	2.01e-12	4.45e-11	17.7347
ECI2	-9.60206	6.15466	-7.21094	2.03e-12	4.49e-11	17.7244
ADD1	-7.82706	14.0658	-7.20392	2.13e-12	4.7e-11	17.6793
ACE	-25.3347	4.99219	-7.20299	2.14e-12	4.72e-11	17.6733
CORO2A	-13.8047	12.1786	-7.20099	2.17e-12	4.77e-11	17.6605
PLCG2	-1.80142	0.828646	-7.19241	2.3e-12	5.05e-11	17.6054
RAP1A	-9.40831	10.8911	-7.18329	2.44e-12	5.36e-11	17.5469
CCR2	-1.78226	0.592243	-7.17408	2.6e-12	5.68e-11	17.4879
FTH1P23	-2.98847	1.88461	-7.16752	2.71e-12	5.93e-11	17.4459
HSPB8	-16.0379	3.36645	-7.16634	2.73e-12	5.97e-11	17.4384
MAGI3	-3.38025	3.09464	-7.16366	2.78e-12	6.06e-11	17.4212
STX12	-10.163	12.0711	-7.16268	2.8e-12	6.1e-11	17.415
MPI	-4.03877	4.04143	-7.15753	2.9e-12	6.3e-11	17.3821
MATN2	-13.4492	6.17996	-7.15625	2.92e-12	6.34e-11	17.3739
KIF1C	-20.8762	23.0856	-7.15574	2.93e-12	6.35e-11	17.3706
FZD5	-12.4783	13.3963	-7.15089	3.03e-12	6.55e-11	17.3396
TMEM45B	-61.5213	51.3419	-7.14753	3.1e-12	6.69e-11	17.3182
CLCN2	-13.473	9.63924	-7.14099	3.23e-12	6.98e-11	17.2765
DDX31	2.71455	4.24893	7.13944	3.27e-12	7.04e-11	17.2666
SH3BGR	-2.49054	1.38501	-7.13808	3.3e-12	7.09e-11	17.2579
PROB1	-1.15165	0.979328	-7.13349	3.4e-12	7.3e-11	17.2286
ACAA1	-7.64625	8.34145	-7.1318	3.44e-12	7.37e-11	17.2179
NAT1	-5.54273	3.32535	-7.12809	3.52e-12	7.54e-11	17.1942
GOLM1	-88.8895	68.6954	-7.11615	3.81e-12	8.15e-11	17.1182
EIF4EBP2	-22.327	27.6958	-7.09091	4.5e-12	9.61e-11	16.9579
PHGR1	-704.204	244.361	-7.08728	4.61e-12	9.83e-11	16.9349
SPINT1	-70.1879	74.9966	-7.0836	4.72e-12	1.01e-10	16.9116
EHHADH	-5.28339	4.49685	-7.06685	5.27e-12	1.12e-10	16.8056
TMC4	-37.8279	36.9973	-7.06447	5.35e-12	1.14e-10	16.7905
POPDC2	-4.40166	1.05846	-7.0545	5.71e-12	1.21e-10	16.7275
CHST5	-5.10137	1.46937	-7.0521	5.8e-12	1.23e-10	16.7123
SLC2A5	-3.48475	0.918242	-7.04809	5.96e-12	1.26e-10	16.687
MAOB	-17.4395	3.38488	-7.04785	5.97e-12	1.26e-10	16.6855
INPP5A	-5.2238	8.13454	-7.04744	5.98e-12	1.26e-10	16.6829
RPS6KA1	-19.5871	23.0947	-7.04605	6.04e-12	1.27e-10	16.6741
XPNPEP2	-42.1009	5.98128	-7.03462	6.51e-12	1.37e-10	16.6021
FBXO32	-12.5688	5.65289	-7.01124	7.58e-12	1.59e-10	16.455
SH3BGRL2	-25.9404	26.5038	-7.00662	7.81e-12	1.64e-10	16.426
ANAPC7	5.9087	9.67871	6.98355	9.08e-12	1.9e-10	16.2813
BORCS6	-3.00961	3.38349	-6.97786	9.42e-12	1.97e-10	16.2456
RIPK3	-5.8557	6.44287	-6.95537	1.09e-11	2.28e-10	16.1051
MAB21L2	-13.4562	3.60246	-6.9544	1.1e-11	2.29e-10	16.099
CYP4F12	-7.98766	4.63493	-6.94466	1.17e-11	2.43e-10	16.0382
LGALS3	-416.686	347.552	-6.93518	1.24e-11	2.58e-10	15.9792
TNFRSF1A	-22.7208	31.2938	-6.90105	1.55e-11	3.21e-10	15.7671
SYNPO2	-20.8437	3.50589	-6.90077	1.55e-11	3.21e-10	15.7653
SOCS6	-6.24969	5.51884	-6.89845	1.57e-11	3.25e-10	15.7509
PPARGC1B	-1.85516	1.50976	-6.8836	1.73e-11	3.58e-10	15.6589
IGHV3-23	-440.613	125.901	-6.86552	1.94e-11	4.01e-10	15.5471
SULT2A1	-9.15052	0.643647	-6.855	2.08e-11	4.28e-10	15.4822
CRADD	-1.45791	1.92446	-6.84628	2.2e-11	4.52e-10	15.4284
MAPK3	-42.063	39.6945	-6.84487	2.22e-11	4.56e-10	15.4198
RHBDL2	-6.28961	3.40117	-6.83138	2.42e-11	4.96e-10	15.3367
SRPX	-7.9275	2.6954	-6.82693	2.49e-11	5.09e-10	15.3094
SLC16A9	-5.78971	2.65097	-6.82376	2.54e-11	5.19e-10	15.2899
IGHV3-11	-136.618	33.9555	-6.81968	2.61e-11	5.32e-10	15.2648
ACSS2	-30.254	30.3777	-6.81622	2.66e-11	5.43e-10	15.2436
ZSWIM6	-3.40966	3.42382	-6.81328	2.71e-11	5.52e-10	15.2256
PDLIM1	-83.9437	122.077	-6.80957	2.78e-11	5.65e-10	15.2028
TSPAN3	-42.9596	45.0089	-6.806	2.84e-11	5.77e-10	15.1808
TP53I3	-14.3872	14.0142	-6.79931	2.97e-11	6.01e-10	15.1399
PIGS	-8.28563	11.2822	-6.79565	3.04e-11	6.15e-10	15.1174
SNX24	-2.43962	1.66104	-6.79413	3.07e-11	6.2e-10	15.1082
TPRG1L	-28.8497	39.9326	-6.77609	3.44e-11	6.94e-10	14.9978
SLAMF7	-8.09004	3.32061	-6.75865	3.84e-11	7.74e-10	14.8914
LRRFIP2	-3.64622	4.7992	-6.75605	3.9e-11	7.86e-10	14.8755
RNASEL	-2.27976	2.16339	-6.75138	4.02e-11	8.08e-10	14.8471
AVPI1	-19.228	19.5234	-6.74386	4.22e-11	8.46e-10	14.8013
TXNDC11	-8.69384	13.6324	-6.74219	4.26e-11	8.53e-10	14.7911
ATP2A3	-36.4746	20.1507	-6.73343	4.5e-11	9.01e-10	14.7378
PTPRR	-5.45515	2.21341	-6.73032	4.59e-11	9.17e-10	14.719
PDLIM2	-1.85045	1.32078	-6.72697	4.69e-11	9.36e-10	14.6986
LXN	-13.7363	10.8238	-6.72182	4.84e-11	9.65e-10	14.6674
RCAN2	-4.21251	2.25996	-6.70277	5.46e-11	1.09e-09	14.5519
BCL2	-2.41349	1.29755	-6.70226	5.48e-11	1.09e-09	14.5488
INAVA	-14.4672	13.6602	-6.69914	5.59e-11	1.11e-09	14.5299
FER1L6	-4.75288	0.972879	-6.69448	5.75e-11	1.14e-09	14.5017
IGKV1-9	-170.843	42.9729	-6.69403	5.77e-11	1.14e-09	14.499
IGLV10-54	-96.9329	16.5134	-6.68349	6.17e-11	1.22e-09	14.4353
TMOD1	-1.52037	0.460738	-6.67331	6.57e-11	1.3e-09	14.3739
A1CF	-4.01451	2.7098	-6.67227	6.61e-11	1.3e-09	14.3676
PRKCD	-16.7408	22.254	-6.66527	6.91e-11	1.36e-09	14.3254
IDH3A	-4.04123	5.02175	-6.66405	6.96e-11	1.37e-09	14.318
SLC13A2	-14.2063	3.39024	-6.65858	7.21e-11	1.42e-09	14.2851
SPECC1	-2.58747	2.13621	-6.64994	7.61e-11	1.49e-09	14.2331
EML1	-1.89964	0.952674	-6.6405	8.07e-11	1.58e-09	14.1764
SLC2A4	-2.26851	0.963208	-6.63887	8.15e-11	1.59e-09	14.1666
FRMD4B	-1.87151	1.67172	-6.63862	8.16e-11	1.6e-09	14.1651
EYA2	-7.13386	1.18034	-6.6323	8.49e-11	1.66e-09	14.1271
FAM162A	-16.8852	19.0591	-6.63165	8.53e-11	1.66e-09	14.1232
ENPP1	-2.07576	1.22482	-6.62695	8.78e-11	1.71e-09	14.0951
FABP6	-98.4616	11.9847	-6.62627	8.82e-11	1.71e-09	14.0909
CTSS	-59.6516	58.996	-6.6251	8.88e-11	1.72e-09	14.084
CNGA1	-2.11386	0.91554	-6.61928	9.21e-11	1.79e-09	14.0491
IGHV5-51	-383.49	102.036	-6.61565	9.42e-11	1.82e-09	14.0273
MEIS3P1	-3.15052	1.52141	-6.61218	9.63e-11	1.86e-09	14.0066
PIGR	-1748.26	765.117	-6.61077	9.71e-11	1.88e-09	13.9981
SVIL	-11.3391	7.71486	-6.60923	9.8e-11	1.89e-09	13.9889
CKMT1A	-5.86351	4.68864	-6.60905	9.81e-11	1.89e-09	13.9878
KLF13	-11.2103	12.5745	-6.60421	1.01e-10	1.95e-09	13.9589
SIPA1L3	-6.77634	8.66608	-6.59817	1.05e-10	2.02e-09	13.9228
AKAP9	-4.6721	3.28147	-6.58572	1.13e-10	2.18e-09	13.8484
FOLR2	-11.8768	4.55774	-6.57806	1.19e-10	2.28e-09	13.8027
NXPE1	-11.2159	4.1936	-6.57609	1.2e-10	2.31e-09	13.791
TSHZ1	-3.57717	3.4378	-6.57579	1.21e-10	2.31e-09	13.7892
MTHFD1L	9.32628	10.9401	6.5752	1.21e-10	2.31e-09	13.7857
AADAC	-11.5433	0.731379	-6.57417	1.22e-10	2.32e-09	13.7796
GBA	-8.8304	11.5328	-6.56345	1.3e-10	2.48e-09	13.7158
MEF2D	-8.7146	10.1092	-6.55702	1.36e-10	2.58e-09	13.6775
SLC39A5	-53.0399	32.1521	-6.55501	1.37e-10	2.61e-09	13.6656
IGLJ1	-1.79343	0.445689	-6.54896	1.42e-10	2.7e-09	13.6296
FTH1P2	-2.58248	1.41812	-6.53548	1.55e-10	2.93e-09	13.5497
DENND5B	-1.34984	0.9285	-6.53443	1.56e-10	2.95e-09	13.5435
IGHV3-73	-75.7092	17.8012	-6.5344	1.56e-10	2.95e-09	13.5433
METTL1	6.7984	9.55168	6.51798	1.72e-10	3.25e-09	13.4461
INAFM2	-11.1503	9.49828	-6.51466	1.76e-10	3.32e-09	13.4264
RUVBL1	7.72037	11.3928	6.50759	1.84e-10	3.46e-09	13.3846
LETM1	-8.9451	10.8609	-6.50374	1.88e-10	3.54e-09	13.3619
ECE1	-19.5182	21.7057	-6.50105	1.91e-10	3.59e-09	13.3461
FCGBP	-272.586	68.2902	-6.4859	2.1e-10	3.94e-09	13.2568
FAM102A	-15.5923	17.8416	-6.48519	2.11e-10	3.95e-09	13.2525
MAPK6	-8.28985	8.7963	-6.4797	2.18e-10	4.08e-09	13.2202
DOLPP1	-10.6215	13.1096	-6.47486	2.25e-10	4.2e-09	13.1918
MPPE1	-1.55187	1.63736	-6.47376	2.26e-10	4.22e-09	13.1853
RAB8A	-4.5793	10.2511	-6.46749	2.35e-10	4.38e-09	13.1485
KCNK5	-15.9288	13.7588	-6.46667	2.36e-10	4.4e-09	13.1436
RASD2	-7.67687	2.88608	-6.45992	2.46e-10	4.58e-09	13.104
PSD	-3.84668	0.975873	-6.45953	2.47e-10	4.58e-09	13.1017
CCNDBP1	-4.48975	5.73958	-6.45309	2.56e-10	4.76e-09	13.0639
LRMP	-2.46096	0.725937	-6.45115	2.6e-10	4.81e-09	13.0526
KCNMA1	-2.89022	0.760449	-6.44101	2.76e-10	5.11e-09	12.9932
DDX60	-10.1122	5.4149	-6.43658	2.84e-10	5.24e-09	12.9672
MRPL17	20.1604	29.1982	6.43448	2.87e-10	5.31e-09	12.9549
PLEKHG6	-17.0144	16.2893	-6.43318	2.9e-10	5.34e-09	12.9473
CD48	-5.26583	2.63668	-6.43294	2.9e-10	5.34e-09	12.9459
CTNND1	-29.1109	45.6256	-6.43134	2.93e-10	5.39e-09	12.9366
S100B	-4.2739	1.93597	-6.42651	3.02e-10	5.54e-09	12.9083
FOXN3	-4.89407	4.12997	-6.42463	3.05e-10	5.6e-09	12.8974
CSNK1E	11.897	19.4839	6.42437	3.05e-10	5.6e-09	12.8958
GRAMD4	-12.2818	13.1464	-6.42406	3.06e-10	5.6e-09	12.894
IGKV4-1	-633.911	177.689	-6.42334	3.07e-10	5.62e-09	12.8898
TXNIP	-171.572	121.715	-6.42053	3.13e-10	5.71e-09	12.8734
MINDY1	-5.71417	6.68508	-6.41679	3.2e-10	5.84e-09	12.8516
RGP1	-5.44705	6.87591	-6.41236	3.29e-10	5.99e-09	12.8257
TTC38	-32.5001	28.6326	-6.40421	3.45e-10	6.28e-09	12.7782
PC	-3.92527	3.34017	-6.38774	3.81e-10	6.94e-09	12.6823
STRADB	-5.30893	5.74566	-6.38752	3.82e-10	6.94e-09	12.6811
IGLV1-50	-4.06177	0.961104	-6.38195	3.95e-10	7.17e-09	12.6487
NAT8B	-10.1628	1.79184	-6.38043	3.99e-10	7.22e-09	12.6399
RIPK1	-5.80986	10.2422	-6.38015	3.99e-10	7.23e-09	12.6382
F13A1	-12.1705	3.34691	-6.35943	4.53e-10	8.18e-09	12.5181
OSBPL1A	-3.54553	2.57814	-6.35308	4.7e-10	8.49e-09	12.4813
2021-03-02	-5.27033	7.21701	-6.34453	4.95e-10	8.93e-09	12.4319
BARX2	-5.34063	1.99043	-6.34061	5.07e-10	9.13e-09	12.4092
PDE5A	-4.52824	2.27551	-6.33833	5.14e-10	9.24e-09	12.396
MIER1	-5.69857	5.33832	-6.33737	5.17e-10	9.28e-09	12.3905
IGKV1D-39	-9.36601	1.17824	-6.33729	5.17e-10	9.28e-09	12.39
TACR2	-7.20305	1.41792	-6.32419	5.59e-10	1e-08	12.3145
TMEM54	-188.082	151.174	-6.32342	5.62e-10	1.01e-08	12.31
SMYD5	8.7921	13.4855	6.32257	5.65e-10	1.01e-08	12.3051
MZB1	-21.5207	6.88232	-6.32159	5.68e-10	1.01e-08	12.2995
HERC3	-2.50782	2.72776	-6.32065	5.71e-10	1.02e-08	12.294
CCNJL	-4.24731	2.20231	-6.31882	5.78e-10	1.03e-08	12.2835
RBPMS2	-5.36502	1.30865	-6.31807	5.8e-10	1.03e-08	12.2792
PELI2	-2.72067	1.73291	-6.31631	5.87e-10	1.04e-08	12.269
CNN1	-86.8561	17.5264	-6.31208	6.02e-10	1.07e-08	12.2447
CD79A	-23.4475	6.70366	-6.30901	6.13e-10	1.09e-08	12.227
AHNAK	-39.6458	25.9341	-6.30701	6.2e-10	1.1e-08	12.2155
FLNC	-20.8875	5.37216	-6.30649	6.22e-10	1.1e-08	12.2125
PLD1	-3.1322	2.45509	-6.30315	6.35e-10	1.12e-08	12.1933
ITGB7	-2.52462	1.23461	-6.29999	6.47e-10	1.14e-08	12.1752
MAST3	-3.44295	3.98659	-6.29949	6.49e-10	1.14e-08	12.1723
PMP22	-40.1963	17.3371	-6.29567	6.64e-10	1.17e-08	12.1504
IGKC	-1540.08	505.382	-6.29464	6.68e-10	1.17e-08	12.1445
AC007318.1	-5.2412	3.71392	-6.28786	6.95e-10	1.22e-08	12.1055
CYS1	-1.83472	0.832542	-6.28564	7.05e-10	1.24e-08	12.0928
EXOSC2	5.53696	8.46333	6.26788	7.83e-10	1.37e-08	11.9911
NDRG1	-57.0895	40.2669	-6.26738	7.86e-10	1.38e-08	11.9882
SAP30L	-3.74955	5.72709	-6.26635	7.91e-10	1.38e-08	11.9823
IGHV6-1	-24.3405	2.93038	-6.26508	7.97e-10	1.39e-08	11.9751
ZFYVE1	-2.37842	3.15566	-6.25432	8.49e-10	1.48e-08	11.9136
VPS26C	-3.32717	5.80958	-6.2541	8.5e-10	1.48e-08	11.9123
KLF3	-14.3729	20.2607	-6.2474	8.85e-10	1.54e-08	11.874
NOB1	27.3583	41.6727	6.24565	8.94e-10	1.55e-08	11.8641
PIK3CG	-1.21094	0.550858	-6.24514	8.97e-10	1.56e-08	11.8612
HNF4G	-10.7652	8.71741	-6.24077	9.2e-10	1.6e-08	11.8363
POLR1B	4.7526	7.33267	6.22934	9.85e-10	1.71e-08	11.7712
CFD	-78.6644	22.496	-6.2277	9.95e-10	1.72e-08	11.7618
CSRP1	-31.4084	23.3929	-6.22054	1.04e-09	1.79e-08	11.7211
DDX56	15.2525	25.3902	6.21897	1.05e-09	1.81e-08	11.7122
IGHJ3P	-23.2457	5.94695	-6.21789	1.05e-09	1.82e-08	11.7061
CKMT1B	-5.90818	5.0605	-6.21636	1.06e-09	1.83e-08	11.6974
BCL2L11	-3.50082	3.87736	-6.21505	1.07e-09	1.85e-08	11.6899
IGKV1-16	-115.438	30.2405	-6.21057	1.1e-09	1.89e-08	11.6645
CYP2J2	-14.9862	11.4388	-6.20969	1.11e-09	1.9e-08	11.6595
HMGCL	-6.97909	9.33874	-6.20618	1.13e-09	1.94e-08	11.6396
ARPIN	-4.15687	5.2178	-6.20436	1.14e-09	1.96e-08	11.6292
TFAP4	2.83904	4.12603	6.20425	1.14e-09	1.96e-08	11.6286
LIPH	-20.0124	15.377	-6.19685	1.19e-09	2.04e-08	11.5867
CCL15	-4.83459	3.352	-6.1914	1.23e-09	2.1e-08	11.5558
NR3C1	-3.33029	1.64429	-6.19132	1.23e-09	2.1e-08	11.5554
AC046185.2	-1.13349	0.853112	-6.18536	1.28e-09	2.18e-08	11.5216
CPED1	-2.98215	1.15511	-6.18253	1.3e-09	2.21e-08	11.5056
GINM1	-10.4595	14.1623	-6.18219	1.3e-09	2.21e-08	11.5037
PLN	-14.7407	3.74528	-6.18171	1.31e-09	2.22e-08	11.501
NEO1	-15.6189	15.7003	-6.18146	1.31e-09	2.22e-08	11.4996
TWNK	6.83759	9.45182	6.18068	1.31e-09	2.22e-08	11.4952
SUN2	-13.7878	17.5274	-6.17884	1.33e-09	2.25e-08	11.4847
PDGFD	-2.0291	1.33205	-6.17829	1.33e-09	2.25e-08	11.4817
MADCAM1	-1.81517	0.557761	-6.17722	1.34e-09	2.26e-08	11.4756
ADGRG7	-6.60213	2.20519	-6.17495	1.36e-09	2.29e-08	11.4628
ATP2B1	-5.87488	6.33749	-6.17002	1.4e-09	2.36e-08	11.4349
CACFD1	-12.9631	14.0467	-6.1688	1.41e-09	2.37e-08	11.4281
HSPB6	-24.318	5.74776	-6.16772	1.42e-09	2.38e-08	11.422
CAP2	-2.47931	1.30449	-6.16622	1.43e-09	2.4e-08	11.4135
BAHD1	-4.72462	7.24823	-6.1646	1.44e-09	2.42e-08	11.4044
MORN5	-1.96215	0.239169	-6.16196	1.47e-09	2.46e-08	11.3895
SMAD7	-6.9965	6.92881	-6.1579	1.5e-09	2.51e-08	11.3666
TNK1	-3.80791	4.98599	-6.15707	1.51e-09	2.52e-08	11.3619
P3H2	-5.02034	2.32057	-6.14616	1.61e-09	2.68e-08	11.3005
UTP4	7.79941	12.0619	6.13957	1.67e-09	2.79e-08	11.2634
TMEM206	2.97965	4.10886	6.13222	1.75e-09	2.91e-08	11.2222
CAMTA2	-5.59365	7.30017	-6.13195	1.75e-09	2.91e-08	11.2206
HERPUD1	-16.6756	22.0318	-6.12882	1.78e-09	2.96e-08	11.2031
URB2	3.02718	4.69727	6.12428	1.83e-09	3.03e-08	11.1776
IGKV1D-42	-6.7217	1.23282	-6.12419	1.83e-09	3.03e-08	11.1771
PCOLCE2	-2.75489	0.441345	-6.12414	1.83e-09	3.03e-08	11.1768
ATP6V0D1	-12.7444	15.8565	-6.12346	1.84e-09	3.04e-08	11.173
CDKN1A	-78.5917	55.9829	-6.11116	1.97e-09	3.26e-08	11.1041
ZMYND19	9.26572	12.927	6.10925	2e-09	3.29e-08	11.0934
STAB1	-7.9017	4.54565	-6.10891	2e-09	3.3e-08	11.0915
CRY2	-3.12297	4.43803	-6.10418	2.06e-09	3.39e-08	11.065
CTDSP2	-27.8628	43.946	-6.10356	2.06e-09	3.39e-08	11.0615
TMEM9B	-13.3009	20.9925	-6.09967	2.11e-09	3.47e-08	11.0398
PRR13P5	-6.34108	5.11992	-6.09764	2.14e-09	3.51e-08	11.0284
IGLV2-33	-1.61647	0.431279	-6.09658	2.15e-09	3.52e-08	11.0226
EXOC6B	-1.54163	1.90566	-6.09488	2.17e-09	3.55e-08	11.013
RPSAP9	-1.00484	0.857593	-6.08567	2.29e-09	3.75e-08	10.9616
TINAG	-5.99185	3.60982	-6.0758	2.43e-09	3.96e-08	10.9066
IGHV3-71	-6.09921	1.27161	-6.0647	2.59e-09	4.22e-08	10.8448
ERBIN	-6.77687	6.79948	-6.06319	2.61e-09	4.25e-08	10.8364
ZC3H12C	-1.83051	1.18883	-6.05914	2.67e-09	4.35e-08	10.8139
MFSD11	-2.16542	3.26421	-6.05666	2.71e-09	4.41e-08	10.8002
FLNB	-34.784	33.6528	-6.05592	2.72e-09	4.42e-08	10.796
GLOD5	-2.83617	1.73992	-6.05466	2.74e-09	4.45e-08	10.789
IGHV4-4	-10.3628	1.83289	-6.05066	2.81e-09	4.55e-08	10.7669
IGLV8-61	-116.286	28.2576	-6.04267	2.94e-09	4.76e-08	10.7225
PPP1R16B	-2.78753	1.29719	-6.03841	3.01e-09	4.87e-08	10.6989
CPTP	-14.3955	16.2489	-6.03756	3.03e-09	4.89e-08	10.6942
ARSA	-14.343	14.8056	-6.02998	3.16e-09	5.1e-08	10.6522
OAT	-54.7865	28.5323	-6.02815	3.2e-09	5.15e-08	10.6421
BMP6	-2.04054	0.766143	-6.02712	3.21e-09	5.17e-08	10.6364
FXYD3	-243.443	161.405	-6.02603	3.24e-09	5.2e-08	10.6304
IGKV1OR2-6	-7.15558	1.63502	-6.02513	3.25e-09	5.22e-08	10.6254
CLRN3	-46.2586	45.679	-6.0179	3.39e-09	5.44e-08	10.5854
CIDEC	-10.0147	1.64695	-6.01272	3.49e-09	5.6e-08	10.5568
MUT	-7.84317	11.3577	-6.00279	3.7e-09	5.92e-08	10.502
ANKRD9	-9.28877	6.71297	-5.99883	3.78e-09	6.05e-08	10.4803
RTKN	10.6145	17.2993	5.99731	3.82e-09	6.1e-08	10.4719
WASHC2C	-3.81651	4.53462	-5.99349	3.9e-09	6.23e-08	10.4508
ETNK1	-11.2319	10.3261	-5.98413	4.12e-09	6.56e-08	10.3993
DIRC2	-3.55662	4.07945	-5.9784	4.25e-09	6.78e-08	10.3679
GNG8	-2.37121	0.383817	-5.97613	4.31e-09	6.86e-08	10.3554
TENT5B	-1.98348	0.672088	-5.97415	4.36e-09	6.93e-08	10.3445
MUL1	-7.45009	14.5	-5.96985	4.47e-09	7.09e-08	10.3209
NIT1	-4.30292	7.56719	-5.96836	4.51e-09	7.15e-08	10.3127
LRRC31	-6.51506	4.36134	-5.968	4.52e-09	7.16e-08	10.3108
GTPBP4	7.41931	11.8843	5.96285	4.65e-09	7.36e-08	10.2825
ATP5F1A	-35.3377	43.6109	-5.9548	4.87e-09	7.7e-08	10.2384
PDK2	-5.73095	5.65842	-5.95181	4.95e-09	7.83e-08	10.222
IGKV1-5	-426.264	147.519	-5.95025	5e-09	7.89e-08	10.2135
GAREM1	-2.3307	2.1105	-5.94896	5.04e-09	7.94e-08	10.2065
MYO15B	-16.0029	12.1185	-5.9487	5.04e-09	7.94e-08	10.2051
INPP5J	-5.53441	3.80658	-5.94814	5.06e-09	7.96e-08	10.202
MIGA2	-3.97387	5.13828	-5.94244	5.23e-09	8.21e-08	10.1708
FOSL2	-19.4852	21.2726	-5.93795	5.36e-09	8.42e-08	10.1463
IGKV3D-20	-47.0344	10.0094	-5.93471	5.46e-09	8.56e-08	10.1286
VPS35L	-3.33117	2.63759	-5.93146	5.56e-09	8.72e-08	10.1109
CASD1	-3.98621	3.87909	-5.91975	5.95e-09	9.31e-08	10.047
POLR2D	4.97225	9.63512	5.91462	6.12e-09	9.57e-08	10.0191
IGHV3-19	-6.22973	1.63705	-5.91385	6.15e-09	9.6e-08	10.0149
ACTG2	-175.459	34.4858	-5.91366	6.16e-09	9.6e-08	10.0139
GPM6B	-1.82391	0.618318	-5.91049	6.27e-09	9.77e-08	9.99666
WDR75	6.3718	9.98372	5.90782	6.36e-09	9.91e-08	9.98215
BTBD9	-1.95119	2.5563	-5.90765	6.37e-09	9.91e-08	9.98118
VAPA	-6.92736	9.30998	-5.90221	6.57e-09	1.02e-07	9.95166
SEMA3G	-3.9182	1.27301	-5.90203	6.58e-09	1.02e-07	9.95064
TMEM25	-1.81437	0.840322	-5.89787	6.73e-09	1.04e-07	9.92805
IGLV1-44	-213.575	49.9149	-5.89731	6.76e-09	1.05e-07	9.92505
PPP1R12B	-8.05282	2.93295	-5.89174	6.97e-09	1.08e-07	9.8948
PRPF4	7.84273	14.7215	5.88669	7.17e-09	1.11e-07	9.86742
ZMIZ1	-6.75789	9.30207	-5.87917	7.49e-09	1.16e-07	9.82667
CCT3	54.3716	100.079	5.87817	7.53e-09	1.16e-07	9.82126
PDCD2L	6.38282	8.53483	5.87591	7.63e-09	1.18e-07	9.80906
ARHGAP35	-5.68932	8.04507	-5.87242	7.78e-09	1.2e-07	9.79019
GPBP1L1	-9.25356	18.0342	-5.86995	7.89e-09	1.21e-07	9.77679
FTH1P7	-3.30178	2.51917	-5.8678	7.98e-09	1.23e-07	9.76518
ATL1	-1.35802	1.28488	-5.85667	8.5e-09	1.3e-07	9.7051
CD180	-1.18221	0.602939	-5.85074	8.79e-09	1.35e-07	9.67311
MYOCD	-1.88374	0.546021	-5.84838	8.91e-09	1.36e-07	9.66041
IGKV3D-11	-12.4932	3.77278	-5.84534	9.06e-09	1.39e-07	9.64399
NDN	-7.5142	4.85779	-5.84214	9.22e-09	1.41e-07	9.62675
RNASEK	-2.2287	3.13688	-5.84171	9.25e-09	1.41e-07	9.62445
UBAP2L	10.9017	22.3154	5.83976	9.35e-09	1.43e-07	9.61393
ATP1B3	-51.4405	74.3818	-5.838	9.44e-09	1.44e-07	9.60448
CNOT9	6.66678	13.733	5.83736	9.48e-09	1.44e-07	9.60103
NEDD9	-7.82524	6.58259	-5.83391	9.66e-09	1.47e-07	9.58248
TRIM27	6.20715	11.7412	5.83332	9.69e-09	1.47e-07	9.57929
GFRA3	-2.86886	0.447381	-5.83111	9.81e-09	1.49e-07	9.56744
RCL1	2.45236	3.9867	5.82762	1e-08	1.52e-07	9.54869
GPRIN2	-6.99596	4.56863	-5.82269	1.03e-08	1.56e-07	9.5222
OAF	-21.6077	29.118	-5.82249	1.03e-08	1.56e-07	9.52115
GALM	-16.3059	19.4206	-5.81755	1.06e-08	1.6e-07	9.4946
ENOPH1	17.4144	29.6939	5.81184	1.09e-08	1.65e-07	9.46402
VTI1B	-5.88795	10.8941	-5.81009	1.1e-08	1.67e-07	9.45462
ASB8	-2.97223	6.38786	-5.80738	1.12e-08	1.69e-07	9.44009
CNPPD1	-21.5003	37.2282	-5.80511	1.14e-08	1.71e-07	9.42794
RPUSD4	4.95656	9.15342	5.80465	1.14e-08	1.71e-07	9.4255
SERINC1	-30.1087	41.5381	-5.80429	1.14e-08	1.71e-07	9.42354
ALAD	-6.44414	10.5698	-5.7961	1.19e-08	1.79e-07	9.37972
NOP2	11.1233	15.8441	5.78625	1.26e-08	1.89e-07	9.32711
BMP8B	-2.81864	2.69758	-5.7833	1.28e-08	1.92e-07	9.31137
CDC42SE2	-12.5837	18.259	-5.78163	1.29e-08	1.94e-07	9.30243
IGKV6-21	-16.7749	4.41141	-5.7776	1.32e-08	1.98e-07	9.28098
JPH2	-3.34384	0.933545	-5.77703	1.33e-08	1.98e-07	9.27791
EAF2	-1.55516	1.61168	-5.77661	1.33e-08	1.99e-07	9.27569
MOB3A	-5.92233	9.22584	-5.776	1.34e-08	1.99e-07	9.27243
PER1	-5.97349	3.68088	-5.75909	1.47e-08	2.18e-07	9.18238
ZPR1	4.43534	8.6061	5.75906	1.47e-08	2.18e-07	9.18225
IGHV3-63	-4.25349	1.07424	-5.75716	1.48e-08	2.2e-07	9.17212
CASZ1	-1.82035	2.21599	-5.75373	1.51e-08	2.24e-07	9.15389
IL16	-1.41256	0.721565	-5.7532	1.52e-08	2.25e-07	9.15109
GHITM	-69.5264	112.84	-5.74675	1.57e-08	2.33e-07	9.11683
CDH3	17.3373	16.8611	5.7453	1.58e-08	2.34e-07	9.10913
GTF2IRD1	10.1112	12.6202	5.74442	1.59e-08	2.35e-07	9.10446
GPER1	-2.29427	0.955611	-5.74397	1.6e-08	2.36e-07	9.10208
FAM83G	-4.44814	6.36005	-5.73877	1.64e-08	2.42e-07	9.07452
PQLC1	-7.78231	8.84539	-5.73628	1.67e-08	2.45e-07	9.06132
NFE2L1	-25.7683	42.6114	-5.73306	1.7e-08	2.5e-07	9.04426
NIPAL3	-3.0383	4.71288	-5.73244	1.7e-08	2.5e-07	9.04097
ARHGAP17	-3.61132	6.58996	-5.73194	1.71e-08	2.51e-07	9.03834
WDR43	12.6688	19.308	5.72422	1.78e-08	2.61e-07	8.99748
SDHD	-25.0035	31.4187	-5.72372	1.79e-08	2.62e-07	8.99483
PLEKHB2	-14.4529	25.3922	-5.72116	1.81e-08	2.65e-07	8.98131
SEMA4G	-11.7891	12.4569	-5.72026	1.82e-08	2.66e-07	8.97652
SH3RF1	-6.09343	8.64191	-5.71523	1.87e-08	2.74e-07	8.94995
TBC1D9	-3.57151	2.67904	-5.71248	1.9e-08	2.78e-07	8.93543
PWP1	9.18473	19.8573	5.70968	1.93e-08	2.82e-07	8.92064
SNRK	-3.22299	4.05213	-5.709	1.94e-08	2.82e-07	8.91709
TEX10	3.12574	5.1721	5.70869	1.94e-08	2.83e-07	8.91543
C8orf88	-1.53444	0.476302	-5.7073	1.96e-08	2.85e-07	8.90812
CYP4F2	-17.718	3.75239	-5.70326	2e-08	2.91e-07	8.88681
ENTR1	11.9692	18.4009	5.70283	2e-08	2.91e-07	8.88455
ATP8A1	-4.56769	3.04881	-5.70209	2.01e-08	2.92e-07	8.88062
TMEM170A	-4.78534	6.95202	-5.6977	2.06e-08	2.99e-07	8.85747
RHOC	-44.3147	55.7428	-5.69334	2.11e-08	3.06e-07	8.83456
CBR1	-26.2016	24.3624	-5.68585	2.2e-08	3.18e-07	8.79514
DDX55	3.21694	4.6706	5.68578	2.2e-08	3.18e-07	8.79477
PHYH	-12.4133	12.3738	-5.68332	2.23e-08	3.22e-07	8.78183
PYCR1	38.2677	47.8713	5.68305	2.23e-08	3.22e-07	8.78042
C6orf136	-9.16232	13.9017	-5.68117	2.26e-08	3.25e-07	8.77052
MFSD4A	-4.78762	2.32978	-5.6768	2.31e-08	3.33e-07	8.7476
SCGB2A1	-3.98366	1.29153	-5.67502	2.34e-08	3.36e-07	8.73823
B3GNT5	-3.83496	4.08495	-5.67357	2.35e-08	3.38e-07	8.73062
AFG3L2	-8.22778	10.3666	-5.67124	2.38e-08	3.42e-07	8.71838
LSP1	-9.73231	6.30488	-5.67055	2.39e-08	3.43e-07	8.71478
RRP12	5.4598	8.00508	5.66633	2.45e-08	3.51e-07	8.69264
RAB37	-1.62905	0.95629	-5.66304	2.49e-08	3.57e-07	8.67539
FTSJ1	11.7868	18.3114	5.66221	2.51e-08	3.58e-07	8.67105
MRGPRF	-8.55906	3.59466	-5.65481	2.61e-08	3.73e-07	8.6323
GIMAP1	-1.132	0.698335	-5.65397	2.62e-08	3.74e-07	8.62792
VPS37B	-9.59664	14.4107	-5.65265	2.64e-08	3.76e-07	8.621
DKC1	28.1689	39.5655	5.65255	2.64e-08	3.76e-07	8.62052
IGKV1-6	-94.9981	26.3304	-5.65177	2.65e-08	3.77e-07	8.6164
UBFD1	4.27315	7.95765	5.64124	2.81e-08	3.99e-07	8.56138
ATIC	22.1739	39.4822	5.63972	2.83e-08	4.02e-07	8.55347
CD27	-5.58001	2.61685	-5.63827	2.86e-08	4.05e-07	8.54589
CFL2	-3.25293	1.62429	-5.63091	2.97e-08	4.21e-07	8.50747
ADRA2A	-9.04466	3.99435	-5.62876	3.01e-08	4.26e-07	8.49629
CLDN5	-6.34352	2.68219	-5.62872	3.01e-08	4.26e-07	8.4961
NTMT1	6.63536	10.5696	5.62307	3.1e-08	4.39e-07	8.46663
GAP43	-1.62824	0.404681	-5.61908	3.17e-08	4.48e-07	8.4459
MAP2K6	-3.98456	3.77565	-5.61753	3.2e-08	4.51e-07	8.4378
ESPN	-13.5953	9.16065	-5.61569	3.23e-08	4.55e-07	8.42822
OGFOD1	3.78212	7.71295	5.61401	3.26e-08	4.59e-07	8.41948
PPRC1	7.16394	11.7795	5.61228	3.29e-08	4.63e-07	8.41051
MMRN1	-3.27519	0.664247	-5.6116	3.3e-08	4.64e-07	8.40698
GNL3	24.1458	37.198	5.61	3.33e-08	4.68e-07	8.39865
BCL2L15	-12.7917	10.5413	-5.60393	3.44e-08	4.83e-07	8.36716
KIAA1671	-4.62123	5.63768	-5.60388	3.45e-08	4.83e-07	8.3669
FAM189A1	-2.118	0.872022	-5.59619	3.59e-08	5.03e-07	8.32699
CYB561D1	-2.12259	2.81942	-5.59394	3.64e-08	5.09e-07	8.31531
ADA2	-8.97649	5.31658	-5.5937	3.64e-08	5.09e-07	8.31408
ZNF263	2.78248	5.61501	5.58509	3.82e-08	5.33e-07	8.26947
C1orf109	2.70366	4.59937	5.58496	3.82e-08	5.33e-07	8.26881
EAPP	-13.049	18.435	-5.5806	3.91e-08	5.45e-07	8.24625
CNN2	37.0859	58.4094	5.57696	3.99e-08	5.55e-07	8.22741
SLC17A5	-9.33974	10.9715	-5.57634	4e-08	5.56e-07	8.2242
ARMCX1	-2.94873	1.8635	-5.57433	4.04e-08	5.62e-07	8.21384
COPS7B	3.65442	7.06372	5.55939	4.38e-08	6.09e-07	8.13674
RBM28	1.72667	2.72294	5.55881	4.4e-08	6.1e-07	8.13373
TRIP13	7.10187	8.53653	5.55721	4.44e-08	6.15e-07	8.12549
NOL6	8.8499	14.1359	5.55593	4.47e-08	6.19e-07	8.11889
ADAMTS1	-7.49744	3.42376	-5.55488	4.49e-08	6.21e-07	8.11349
IGKV1OR22-5	-2.23699	0.534037	-5.55337	4.53e-08	6.26e-07	8.10571
ERCC3	2.69288	6.43686	5.55191	4.56e-08	6.3e-07	8.09818
DEFB1	-19.1195	6.75382	-5.55127	4.58e-08	6.32e-07	8.09491
ACBD6	3.08721	5.3951	5.54797	4.66e-08	6.43e-07	8.07794
IGHV3-15	-281.815	69.0368	-5.54667	4.7e-08	6.47e-07	8.07126
SAR1B	-3.24762	4.75627	-5.54544	4.73e-08	6.5e-07	8.06489
RAB1B	-38.7261	83.653	-5.54252	4.8e-08	6.6e-07	8.0499
CBX8	3.12726	4.20569	5.53585	4.98e-08	6.84e-07	8.01562
NAT8	-5.51529	0.601102	-5.52959	5.15e-08	7.06e-07	7.98348
CALML4	-3.83346	4.9205	-5.5293	5.16e-08	7.07e-07	7.982
NFE2L3	30.2623	34.4058	5.52498	5.28e-08	7.22e-07	7.95982
CCDC86	14.2904	21.0154	5.52491	5.28e-08	7.22e-07	7.95949
BRPF3	-6.46388	9.39759	-5.52112	5.39e-08	7.37e-07	7.94004
KCNMB1	-3.50607	1.0364	-5.51999	5.42e-08	7.4e-07	7.93425
AUH	-4.4691	7.40846	-5.51489	5.57e-08	7.6e-07	7.90817
ATG4A	-3.47389	4.81988	-5.51186	5.66e-08	7.72e-07	7.89264
ABHD11-AS1	-26.6977	13.7441	-5.51106	5.69e-08	7.75e-07	7.88858
TXNRD3	1.61856	2.36671	5.51063	5.7e-08	7.76e-07	7.88636
CAMK2D	-6.31554	7.57924	-5.50991	5.72e-08	7.78e-07	7.8827
ADCY6	-6.79306	9.36545	-5.50937	5.74e-08	7.8e-07	7.87991
NDST1	-5.30908	7.02363	-5.50856	5.76e-08	7.82e-07	7.87576
TTC26	1.62265	2.08262	5.50776	5.79e-08	7.85e-07	7.87169
CCT7	54.488	104.725	5.50699	5.81e-08	7.87e-07	7.86773
GAB1	-2.35605	2.55005	-5.49002	6.36e-08	8.62e-07	7.78111
MCOLN2	-5.56868	2.89911	-5.48869	6.41e-08	8.67e-07	7.77435
KAT2A	19.1148	26.3795	5.48493	6.54e-08	8.83e-07	7.75518
PLA2G10	-5.04623	3.05852	-5.48113	6.67e-08	9e-07	7.73585
MYO1C	-20.6204	29.3781	-5.47644	6.84e-08	9.22e-07	7.71197
C11orf54	-5.56103	5.96837	-5.47476	6.9e-08	9.28e-07	7.7034
ATP23	-4.1063	6.05361	-5.4746	6.91e-08	9.28e-07	7.70262
KIAA1549	2.15207	2.50938	5.47457	6.91e-08	9.28e-07	7.70244
MBOAT1	-8.61293	8.82737	-5.4745	6.91e-08	9.28e-07	7.7021
AJUBA	4.31527	4.58161	5.473	6.97e-08	9.35e-07	7.69445
DTX4	-9.08651	14.979	-5.46969	7.09e-08	9.51e-07	7.67765
NCOA1	-3.38112	4.72194	-5.46826	7.15e-08	9.57e-07	7.67039
IGHV5-78	-4.02647	1.44156	-5.46616	7.23e-08	9.67e-07	7.6597
CCT2	33.0247	56.2495	5.46204	7.39e-08	9.88e-07	7.63881
FNIP2	-3.59739	3.74666	-5.45954	7.49e-08	1e-06	7.62609
PUS7	6.42673	8.26869	5.45826	7.54e-08	1.01e-06	7.61962
SF3B3	10.7857	20.4828	5.45668	7.6e-08	1.01e-06	7.61159
RNPS1	8.41198	18.0824	5.45297	7.75e-08	1.03e-06	7.59282
MRGBP	11.9976	16.3264	5.45054	7.85e-08	1.05e-06	7.5805
SETD6	2.12854	3.34922	5.44989	7.88e-08	1.05e-06	7.57719
ARF3	-22.3934	46.2956	-5.44656	8.02e-08	1.07e-06	7.56033
APLP2	-40.4758	71.7319	-5.44547	8.07e-08	1.07e-06	7.5548
SPINDOC	7.34539	9.78866	5.44073	8.27e-08	1.1e-06	7.53084
PAFAH1B1	-7.05348	12.5336	-5.43986	8.31e-08	1.1e-06	7.52644
WDR74	5.97372	9.50118	5.43379	8.58e-08	1.14e-06	7.49578
FAM214A	-1.7784	1.71923	-5.43327	8.61e-08	1.14e-06	7.49314
TADA2B	-2.57374	5.44897	-5.42852	8.83e-08	1.17e-06	7.46918
FOXO4	-6.92103	7.80566	-5.42615	8.94e-08	1.18e-06	7.45722
ENC1	25.5297	31.4714	5.42079	9.19e-08	1.21e-06	7.43018
BCL10	-11.2896	14.1908	-5.4202	9.22e-08	1.22e-06	7.42718
ABCA5	-1.89088	1.32047	-5.42014	9.23e-08	1.22e-06	7.4269
PREB	14.7509	29.9977	5.41679	9.39e-08	1.24e-06	7.40999
RAN	50.3268	85.0074	5.41154	9.65e-08	1.27e-06	7.38358
NAT10	12.2296	19.6675	5.40663	9.91e-08	1.3e-06	7.35888
CTPS1	6.03339	8.97054	5.39817	1.04e-07	1.36e-06	7.31637
CBFB	11.8361	16.7673	5.39801	1.04e-07	1.36e-06	7.31558
KLC4	-10.4008	10.8409	-5.39359	1.06e-07	1.39e-06	7.29335
PID1	-10.2603	6.35723	-5.39259	1.07e-07	1.4e-06	7.28836
NOM1	2.49651	4.44276	5.3907	1.08e-07	1.41e-06	7.27888
SEPHS2	-45.4702	55.2903	-5.38841	1.09e-07	1.42e-06	7.26738
RNF103	-4.2325	5.99775	-5.38662	1.1e-07	1.44e-06	7.2584
CCT6A	48.5388	79.51	5.38267	1.12e-07	1.47e-06	7.23862
BAK1	-17.1107	22.9346	-5.38154	1.13e-07	1.47e-06	7.23294
BYSL	13.345	16.3635	5.37961	1.14e-07	1.49e-06	7.2233
RNF11	-11.7476	17.0002	-5.37838	1.15e-07	1.5e-06	7.21714
TMEM185B	8.28348	14.1369	5.37736	1.16e-07	1.5e-06	7.21204
NOP16	8.95194	13.9924	5.37619	1.16e-07	1.51e-06	7.20615
MUC13	-191.959	199.742	-5.37376	1.18e-07	1.53e-06	7.194
FTH1P3	-1.21226	0.942221	-5.36862	1.21e-07	1.57e-06	7.16829
CAST	-16.1624	22.2692	-5.36773	1.22e-07	1.57e-06	7.16385
NR2C2AP	10.585	16.8422	5.36629	1.22e-07	1.58e-06	7.15668
ALDH6A1	-3.70242	4.14946	-5.3564	1.29e-07	1.67e-06	7.10732
ZNF202	1.85621	3.22619	5.35571	1.29e-07	1.67e-06	7.10385
WDR12	3.39718	5.72911	5.35327	1.31e-07	1.69e-06	7.09172
MFAP4	-47.3745	21.2289	-5.35312	1.31e-07	1.69e-06	7.09097
NMNAT1	-2.24036	3.53763	-5.3517	1.32e-07	1.7e-06	7.08387
FAM89A	4.25001	5.22147	5.35165	1.32e-07	1.7e-06	7.08365
NUP93	2.92211	5.8092	5.35141	1.32e-07	1.7e-06	7.08242
CHTOP	5.79282	16.1174	5.35071	1.33e-07	1.71e-06	7.07896
ASB7	-1.85672	3.27947	-5.34976	1.34e-07	1.71e-06	7.07421
SLC30A4	-2.82361	1.05886	-5.34969	1.34e-07	1.71e-06	7.07386
MFN2	-13.0287	24.3046	-5.33504	1.44e-07	1.85e-06	7.00098
PPM1G	22.1195	48.0114	5.33325	1.46e-07	1.86e-06	6.99205
CCDC85C	-1.77849	2.32454	-5.32879	1.49e-07	1.91e-06	6.96994
CAT	-22.7558	31.3223	-5.32415	1.53e-07	1.95e-06	6.94691
CNDP2	-11.9779	15.7085	-5.32272	1.54e-07	1.96e-06	6.93982
RRP9	23.4887	33.0072	5.3196	1.56e-07	1.99e-06	6.92435
HSP90AB1	325.763	551.766	5.30905	1.65e-07	2.1e-06	6.87208
ARMC10	6.83865	10.9057	5.30554	1.68e-07	2.14e-06	6.85471
EXT1	-4.19496	7.17359	-5.30472	1.69e-07	2.15e-06	6.85068
GRAMD1A	11.8725	16.0169	5.30467	1.69e-07	2.15e-06	6.85041
ELAVL1	5.41219	14.7267	5.30385	1.7e-07	2.15e-06	6.84637
P2RY8	-1.83197	1.00252	-5.30361	1.7e-07	2.16e-06	6.84517
GYPC	-4.01379	2.7546	-5.30347	1.7e-07	2.16e-06	6.84446
RGMA	-1.41997	0.611685	-5.3006	1.73e-07	2.18e-06	6.8303
RNF125	-2.14325	1.504	-5.30058	1.73e-07	2.18e-06	6.8302
VAMP2	-11.0617	10.6696	-5.29575	1.77e-07	2.24e-06	6.80636
COLGALT1	18.8004	34.289	5.29467	1.78e-07	2.25e-06	6.80103
SDHA	-15.5881	20.9629	-5.29217	1.8e-07	2.28e-06	6.78868
DAB2IP	-10.4363	14.4906	-5.29112	1.81e-07	2.29e-06	6.78349
HEBP1	-8.53551	10.1864	-5.29046	1.82e-07	2.29e-06	6.78026
LMBRD1	-16.2577	21.4818	-5.28977	1.83e-07	2.3e-06	6.77685
NAT9	6.23827	9.77054	5.2883	1.84e-07	2.31e-06	6.76958
SLC44A1	-10.4647	17.4185	-5.28392	1.88e-07	2.37e-06	6.74801
QSOX2	5.4647	8.11052	5.28187	1.9e-07	2.39e-06	6.73792
OPTN	-15.0377	18.7958	-5.28007	1.92e-07	2.41e-06	6.72905
CDK4	24.7551	37.9288	5.27623	1.96e-07	2.46e-06	6.71014
ALKBH2	5.17539	7.73866	5.27483	1.97e-07	2.47e-06	6.70325
CD3EAP	2.20807	2.75008	5.27311	1.99e-07	2.49e-06	6.69476
EPHA10	-2.3076	2.13459	-5.26617	2.06e-07	2.58e-06	6.66066
IARS	16.3425	26.7457	5.26568	2.07e-07	2.58e-06	6.65824
EDNRB	-2.66422	2.02225	-5.26039	2.12e-07	2.65e-06	6.6323
CDK2	6.8539	11.3625	5.25886	2.14e-07	2.67e-06	6.62477
EPHB4	17.9923	27.015	5.25459	2.19e-07	2.73e-06	6.60386
BIN2	-2.01025	1.8354	-5.25313	2.21e-07	2.75e-06	6.59669
WBP1L	-6.70293	12.5662	-5.24946	2.25e-07	2.8e-06	6.57868
MYO5B	-9.89886	13.6177	-5.24545	2.29e-07	2.85e-06	6.55904
GABARAP	-13.5724	14.4156	-5.24541	2.29e-07	2.85e-06	6.55888
ANKS4B	-9.03523	12.2588	-5.24314	2.32e-07	2.88e-06	6.54777
IGHV3-60	-2.87888	0.865484	-5.24171	2.34e-07	2.9e-06	6.54077
PPP2CB	-11.029	16.7276	-5.23944	2.37e-07	2.93e-06	6.52967
SSTR1	-2.9638	1.78642	-5.23855	2.38e-07	2.95e-06	6.52531
TRDC	-2.78662	0.850305	-5.21887	2.63e-07	3.26e-06	6.42922
PGRMC2	-7.6925	14.9337	-5.21745	2.65e-07	3.28e-06	6.42233
MYO7B	-16.8357	17.7234	-5.21448	2.69e-07	3.32e-06	6.40784
PRR13	-28.2616	51.0659	-5.2144	2.69e-07	3.32e-06	6.40747
DCTD	12.2731	26.5332	5.21348	2.7e-07	3.34e-06	6.40299
NTS	-27.5072	2.4894	-5.21305	2.71e-07	3.34e-06	6.4009
EXOSC7	5.58488	9.40522	5.20583	2.81e-07	3.46e-06	6.36576
PNCK	-1.26379	0.358746	-5.20403	2.84e-07	3.49e-06	6.357
TAB2	-7.81525	13.3159	-5.20376	2.84e-07	3.49e-06	6.35573
DACT3	-1.85233	0.818927	-5.1993	2.91e-07	3.57e-06	6.33402
INTS7	3.77406	6.76214	5.19384	2.99e-07	3.67e-06	6.30756
GARS	29.6655	45.4217	5.19115	3.03e-07	3.72e-06	6.29448
PSMD14	6.80587	12.1062	5.19093	3.03e-07	3.72e-06	6.29343
CMTM8	9.42395	14.4834	5.19021	3.04e-07	3.73e-06	6.28991
PPP1R14A	-8.8085	4.3215	-5.19002	3.05e-07	3.73e-06	6.28903
HEATR5A	-1.55026	2.21505	-5.18607	3.11e-07	3.8e-06	6.26984
FAM98A	4.32098	10.2726	5.18523	3.12e-07	3.82e-06	6.26577
EIF3B	23.8167	39.8397	5.18391	3.14e-07	3.84e-06	6.25939
IGLV3-1	-159.638	39.2009	-5.18272	3.16e-07	3.86e-06	6.25362
LUZP1	-3.9805	5.88336	-5.18266	3.16e-07	3.86e-06	6.25335
NUDT16	-4.57862	7.4513	-5.17	3.37e-07	4.11e-06	6.19212
CASP10	-4.5523	5.16085	-5.16976	3.38e-07	4.11e-06	6.19095
ATP2B4	-10.4013	6.42011	-5.16848	3.4e-07	4.14e-06	6.18477
ZNF473	1.37012	2.21579	5.1677	3.41e-07	4.15e-06	6.18101
ARL4D	-2.64569	1.60634	-5.16667	3.43e-07	4.17e-06	6.17601
BUD23	7.85428	14.7129	5.16603	3.44e-07	4.18e-06	6.17295
PNO1	8.83853	13.5541	5.16581	3.45e-07	4.18e-06	6.17187
P2RY10	-1.26032	0.66793	-5.16205	3.51e-07	4.26e-06	6.15371
PPARD	-10.0119	14.0002	-5.16076	3.54e-07	4.28e-06	6.14748
ZNF746	1.48885	3.44545	5.15968	3.56e-07	4.3e-06	6.14231
ACP2	-7.24647	12.1626	-5.15862	3.58e-07	4.32e-06	6.13718
SLC22A17	-2.1307	1.28208	-5.15781	3.59e-07	4.33e-06	6.13325
DCUN1D5	12.7448	17.7468	5.15666	3.61e-07	4.36e-06	6.12772
DNAJB5	-1.74892	0.886065	-5.15529	3.64e-07	4.38e-06	6.12112
SPATA24	-1.52896	2.07326	-5.15489	3.64e-07	4.39e-06	6.11921
MLXIP	-12.6288	17.7159	-5.15328	3.67e-07	4.42e-06	6.11142
TBC1D24	1.12941	1.85699	5.15251	3.69e-07	4.43e-06	6.10771
IGHV1-12	-8.03533	2.04179	-5.15155	3.71e-07	4.45e-06	6.10308
GCG	-14.8192	1.19226	-5.15079	3.72e-07	4.47e-06	6.09946
DDX10	2.88284	4.58152	5.15068	3.72e-07	4.47e-06	6.09892
ST7	2.1853	4.4251	5.14822	3.77e-07	4.52e-06	6.08707
TRAP1	17.0395	26.7925	5.14729	3.79e-07	4.54e-06	6.08257
RBMX	15.9028	36.0388	5.14624	3.81e-07	4.56e-06	6.07753
IGHV1-14	-3.02133	0.853058	-5.14605	3.81e-07	4.56e-06	6.07664
MPV17	3.55298	7.36227	5.14333	3.86e-07	4.62e-06	6.06354
KALRN	-1.3453	1.82676	-5.14176	3.89e-07	4.65e-06	6.056
CAMK2N1	-69.1988	54.0456	-5.14043	3.92e-07	4.68e-06	6.04957
MORC2	4.49808	8.62199	5.13703	3.99e-07	4.75e-06	6.03328
AC135068.2	-2.47986	0.454999	-5.13695	3.99e-07	4.75e-06	6.03287
CCNG2	-3.99411	4.69233	-5.13558	4.02e-07	4.78e-06	6.02628
POLR1C	10.6209	15.6017	5.1309	4.11e-07	4.89e-06	6.00381
NEBL	6.69755	7.67278	5.12649	4.21e-07	5e-06	5.98265
THUMPD2	1.92792	3.13832	5.12295	4.28e-07	5.08e-06	5.96569
HAUS5	3.12819	4.75602	5.12193	4.3e-07	5.1e-06	5.9608
AMPD2	5.10563	8.93442	5.12191	4.31e-07	5.1e-06	5.96072
SUCLG1	-21.8347	33.8554	-5.12116	4.32e-07	5.11e-06	5.95709
DECR1	-14.1789	21.625	-5.12104	4.32e-07	5.11e-06	5.95653
ETV4	35.2974	35.4351	5.11944	4.36e-07	5.15e-06	5.94889
POLD2	30.0034	45.6491	5.11817	4.39e-07	5.17e-06	5.9428
NUMB	-3.75768	7.50453	-5.11811	4.39e-07	5.17e-06	5.9425
GSTM4	-5.968	5.98427	-5.11188	4.53e-07	5.34e-06	5.91268
KIF20A	5.17806	7.37071	5.11026	4.57e-07	5.37e-06	5.90495
IGLC3	-569.899	181.908	-5.10914	4.59e-07	5.4e-06	5.89961
PPP1R3C	-1.81564	0.923432	-5.10867	4.6e-07	5.41e-06	5.89733
XPOT	11.8084	16.9218	5.10855	4.6e-07	5.41e-06	5.89675
ORC6	3.31789	4.08705	5.10835	4.61e-07	5.41e-06	5.8958
LRP10	-36.7619	48.3743	-5.10794	4.62e-07	5.42e-06	5.89387
TNS1	-15.1912	6.18506	-5.10579	4.67e-07	5.47e-06	5.88359
HJURP	5.59158	7.43523	5.10453	4.7e-07	5.5e-06	5.87755
ICAM3	-1.1238	0.590131	-5.10343	4.73e-07	5.53e-06	5.87229
CSNK2A2	6.51606	13.0623	5.1026	4.74e-07	5.55e-06	5.86832
RHBDF2	5.98944	7.86958	5.10015	4.8e-07	5.61e-06	5.85665
STIP1	22.7019	44.3851	5.09775	4.86e-07	5.68e-06	5.8452
NONO	47.5217	88.9662	5.09471	4.94e-07	5.76e-06	5.8307
RANGAP1	17.2621	29.4215	5.09449	4.94e-07	5.76e-06	5.82962
ZADH2	-3.13267	5.05886	-5.09094	5.03e-07	5.85e-06	5.81272
EZH2	5.75498	8.73923	5.09073	5.04e-07	5.85e-06	5.81173
PBXIP1	-19.0584	22.3739	-5.08981	5.06e-07	5.87e-06	5.80733
NUP43	5.96854	10.7917	5.08955	5.07e-07	5.87e-06	5.80608
DPM2	9.853	18.1533	5.08633	5.15e-07	5.96e-06	5.79077
NUP85	5.24875	10.3429	5.086	5.16e-07	5.97e-06	5.78917
S100A11	534.801	675.001	5.08405	5.21e-07	6.02e-06	5.7799
ARHGEF25	-3.29783	1.84293	-5.08228	5.25e-07	6.07e-06	5.7715
VAMP8	-69.081	110.507	-5.08073	5.3e-07	6.11e-06	5.76411
TRPM4	-18.5655	19.1294	-5.07981	5.32e-07	6.14e-06	5.75972
ACTR3B	1.29405	1.94814	5.07957	5.33e-07	6.14e-06	5.75857
NUTF2	21.4598	35.3857	5.07679	5.4e-07	6.22e-06	5.74539
TKT	30.1495	51.8188	5.0765	5.41e-07	6.23e-06	5.744
PUM3	12.5266	19.5905	5.07297	5.5e-07	6.33e-06	5.72721
SRPRB	12.9213	23.7708	5.07224	5.52e-07	6.35e-06	5.72377
IGKV1OR22-1	-4.74067	0.820731	-5.07162	5.54e-07	6.37e-06	5.72081
DES	-371.605	77.1755	-5.07128	5.55e-07	6.37e-06	5.71917
UBE2I	6.19673	14.2507	5.07092	5.56e-07	6.38e-06	5.71749
NIFK	14.1793	23.5157	5.07062	5.57e-07	6.38e-06	5.71604
RCC2	26.9009	53.2111	5.06975	5.59e-07	6.41e-06	5.71194
SMG9	2.525	5.18137	5.06777	5.65e-07	6.47e-06	5.70251
MRPL3	24.4955	47.2961	5.0676	5.65e-07	6.47e-06	5.70171
DPYD	-2.95261	1.50732	-5.0659	5.7e-07	6.52e-06	5.69366
EARS2	3.58684	7.41246	5.06545	5.72e-07	6.53e-06	5.69154
RIOX2	2.14573	4.39782	5.06307	5.78e-07	6.6e-06	5.68022
ACVR1C	-1.02816	0.727038	-5.06285	5.79e-07	6.6e-06	5.67917
KANK2	-9.20696	7.72914	-5.06002	5.87e-07	6.69e-06	5.66577
MARK2	-7.07416	15.5611	-5.05821	5.93e-07	6.75e-06	5.65718
DHX37	4.03414	7.43873	5.05503	6.02e-07	6.85e-06	5.64211
C17orf78	-9.57834	1.08459	-5.05484	6.03e-07	6.85e-06	5.64123
RETREG1	-8.49312	6.91858	-5.05242	6.1e-07	6.93e-06	5.62977
SND1	30.7393	59.6564	5.04772	6.24e-07	7.08e-06	5.60754
RFWD3	5.54018	9.83305	5.03887	6.53e-07	7.39e-06	5.5657
EXOSC3	4.39273	8.12991	5.03864	6.53e-07	7.39e-06	5.56462
IGLV3-9	-71.4648	13.1632	-5.03861	6.53e-07	7.39e-06	5.56452
LTK	-4.15745	1.91297	-5.03788	6.56e-07	7.41e-06	5.56107
PRSS36	-1.14478	0.739606	-5.03486	6.66e-07	7.52e-06	5.54679
PUS1	6.7415	9.13578	5.03423	6.68e-07	7.54e-06	5.54381
TBC1D10A	-1.26871	2.1142	-5.03277	6.73e-07	7.59e-06	5.53694
GRWD1	4.77564	9.98849	5.03268	6.73e-07	7.59e-06	5.53651
OGDH	-19.1983	37.2803	-5.03154	6.77e-07	7.62e-06	5.53116
COX5A	-79.8073	118.257	-5.03003	6.82e-07	7.68e-06	5.524
RIOK1	5.42207	9.57003	5.02887	6.86e-07	7.71e-06	5.51853
TPM1	-24.936	27.1609	-5.02838	6.87e-07	7.73e-06	5.51625
CDCA5	9.45541	13.1807	5.02312	7.06e-07	7.93e-06	5.49146
NOC3L	3.65178	5.23667	5.0214	7.12e-07	7.99e-06	5.48339
PRRG2	-4.39414	6.78722	-5.01971	7.18e-07	8.05e-06	5.47544
MRTO4	14.2798	23.515	5.01545	7.33e-07	8.21e-06	5.45537
CAD	9.60398	13.7364	5.0134	7.4e-07	8.29e-06	5.44576
PPAT	3.9159	5.20677	5.01091	7.5e-07	8.39e-06	5.43403
ZDHHC7	-8.58724	18.6766	-5.01015	7.53e-07	8.41e-06	5.43047
NSUN5	7.41458	12.9476	5.0076	7.62e-07	8.52e-06	5.4185
SOCS2	-1.57645	1.54699	-5.00309	7.79e-07	8.7e-06	5.39734
PALB2	2.34777	4.28515	5.00114	7.87e-07	8.77e-06	5.3882
IGHV1OR15-2	-7.07313	2.01857	-5.00114	7.87e-07	8.77e-06	5.38817
FRAT1	-1.54511	2.35439	-5.00055	7.89e-07	8.79e-06	5.3854
LRRN4CL	-1.37555	0.99688	-4.99696	8.03e-07	8.94e-06	5.36859
IGKV3-11	-333.339	109.37	-4.99586	8.08e-07	8.98e-06	5.36344
PCSK6	-1.56567	1.67585	-4.99211	8.23e-07	9.15e-06	5.34588
ILF3	14.2885	31.1192	4.99187	8.24e-07	9.15e-06	5.34474
TAMM41	1.29435	2.25741	4.99151	8.25e-07	9.16e-06	5.34305
POLR1E	6.15198	11.5264	4.99019	8.31e-07	9.21e-06	5.33688
LSG1	5.03567	11.6641	4.99001	8.31e-07	9.21e-06	5.33607
CPSF3	7.43195	15.2255	4.98996	8.31e-07	9.21e-06	5.33581
CCNF	4.09411	5.91923	4.98627	8.47e-07	9.37e-06	5.31855
CMSS1	5.09661	7.31781	4.98551	8.5e-07	9.4e-06	5.31498
XPO5	6.59844	10.1325	4.98538	8.5e-07	9.4e-06	5.31438
B2M	-645.695	665.091	-4.984	8.56e-07	9.46e-06	5.30794
COBL	-2.99744	3.63932	-4.98303	8.6e-07	9.49e-06	5.30339
KIF18B	4.36765	5.61311	4.98051	8.71e-07	9.61e-06	5.29163
NOP58	21.8119	32.0132	4.97999	8.73e-07	9.62e-06	5.2892
PPME1	3.35054	8.35038	4.97316	9.03e-07	9.95e-06	5.25729
ZNF74	2.16718	3.26127	4.97118	9.12e-07	1e-05	5.24806
RCSD1	-2.15332	1.47694	-4.96307	9.49e-07	1.04e-05	5.21029
PLB1	-1.99797	0.645709	-4.96268	9.51e-07	1.04e-05	5.20848
SMYD2	5.26763	9.47181	4.96181	9.55e-07	1.05e-05	5.20442
NOP14	11.9314	22.8219	4.95552	9.85e-07	1.08e-05	5.17514
RP9	3.10901	5.59168	4.95189	1e-06	1.1e-05	5.15828
SLC44A2	-13.3976	27.4485	-4.9499	1.01e-06	1.11e-05	5.14903
OSBPL3	4.53256	5.69074	4.94733	1.03e-06	1.12e-05	5.13709
ILKAP	2.93577	6.92543	4.94593	1.03e-06	1.13e-05	5.13059
SLC27A4	-15.0197	21.9666	-4.9435	1.04e-06	1.14e-05	5.1193
RRP1	7.74691	12.0307	4.94302	1.05e-06	1.14e-05	5.11708
PANK3	-6.91452	7.67234	-4.93858	1.07e-06	1.17e-05	5.09645
GIPC2	-7.42098	9.33164	-4.93605	1.08e-06	1.18e-05	5.08475
EIF2AK3	-2.55678	4.51651	-4.93603	1.08e-06	1.18e-05	5.08464
IMPDH1	21.8527	29.3297	4.93273	1.1e-06	1.2e-05	5.06936
BUB3	7.57402	15.5679	4.93186	1.11e-06	1.2e-05	5.06533
ZNF200	1.06022	1.88879	4.93105	1.11e-06	1.21e-05	5.0616
IGLV4-69	-148.973	39.5928	-4.92914	1.12e-06	1.22e-05	5.05273
RANBP1	13.9314	23.2845	4.92878	1.12e-06	1.22e-05	5.05108
GMPS	4.94141	9.67867	4.92739	1.13e-06	1.23e-05	5.04465
PPM1H	6.26189	7.36992	4.9247	1.15e-06	1.24e-05	5.03222
SLC27A2	-9.53569	11.3207	-4.9234	1.15e-06	1.25e-05	5.02618
TRMT1	11.4241	16.1465	4.92247	1.16e-06	1.25e-05	5.02188
RBM19	3.17322	6.15783	4.92169	1.16e-06	1.26e-05	5.01829
ULK3	-6.80319	11.6022	-4.9211	1.17e-06	1.26e-05	5.01554
MRM2	6.3136	13.2038	4.92005	1.17e-06	1.26e-05	5.01071
MSTO1	1.30551	2.27816	4.92004	1.17e-06	1.26e-05	5.01064
TMEM39A	3.29227	7.09844	4.91998	1.17e-06	1.26e-05	5.01039
SLC6A4	-2.63548	0.737043	-4.91882	1.18e-06	1.27e-05	5.00502
PRSS8	-83.233	95.8156	-4.91875	1.18e-06	1.27e-05	5.00473
SYTL2	-6.00449	5.53531	-4.91769	1.19e-06	1.28e-05	4.99982
SPEG	-1.08554	0.379357	-4.9169	1.19e-06	1.28e-05	4.99618
ARHGEF9	-2.10966	3.09113	-4.90863	1.24e-06	1.33e-05	4.95801
ME2	-4.76975	6.22212	-4.90747	1.25e-06	1.34e-05	4.95265
KDM4A	-4.94996	9.99635	-4.90737	1.25e-06	1.34e-05	4.95217
SIPA1L2	-5.3399	5.12717	-4.90344	1.27e-06	1.36e-05	4.93407
LGALSL	-4.08031	5.55709	-4.90001	1.29e-06	1.38e-05	4.91829
SLC12A8	2.83428	4.5135	4.89404	1.33e-06	1.42e-05	4.8908
NLE1	4.80704	7.28936	4.89236	1.34e-06	1.43e-05	4.88311
CD44	25.0884	36.9343	4.89125	1.35e-06	1.44e-05	4.87798
PA2G4	31.0314	57.6061	4.88893	1.36e-06	1.46e-05	4.86731
IDNK	-2.39636	2.75974	-4.88324	1.4e-06	1.5e-05	4.84119
GART	8.0481	14.4325	4.88318	1.4e-06	1.5e-05	4.84095
NUP107	3.60227	6.30025	4.88002	1.42e-06	1.52e-05	4.82645
IGKV2-24	-101.944	23.0123	-4.87985	1.42e-06	1.52e-05	4.82566
CPQ	-5.55794	5.45349	-4.87976	1.42e-06	1.52e-05	4.82522
RIPK2	6.94894	9.55924	4.87876	1.43e-06	1.52e-05	4.82065
GNAQ	-8.11418	10.4989	-4.87002	1.49e-06	1.59e-05	4.78061
DNAAF5	6.30548	10.7766	4.86834	1.51e-06	1.6e-05	4.77294
PDE3A	-5.52763	2.79848	-4.86563	1.53e-06	1.62e-05	4.76053
C1orf21	-4.5441	4.82903	-4.86504	1.53e-06	1.62e-05	4.75781
WDR3	3.1628	5.38089	4.85948	1.57e-06	1.67e-05	4.73242
MKRN2OS	-1.61618	1.68836	-4.85618	1.6e-06	1.69e-05	4.71731
AUNIP	2.08459	2.53877	4.85597	1.6e-06	1.69e-05	4.71639
PLEKHA8P1	1.1045	1.43381	4.85432	1.61e-06	1.7e-05	4.70883
TRAIP	2.19819	3.31318	4.85222	1.63e-06	1.72e-05	4.69925
KIF2C	7.79583	11.4884	4.85166	1.63e-06	1.72e-05	4.6967
TRIP4	-3.35413	7.14118	-4.84937	1.65e-06	1.74e-05	4.68625
LRRC20	3.82874	6.05089	4.8492	1.65e-06	1.74e-05	4.68547
ACD	5.22272	8.80116	4.84864	1.66e-06	1.75e-05	4.68292
ANKZF1	4.81371	8.06421	4.84782	1.66e-06	1.75e-05	4.67921
CSE1L	38.3892	52.7568	4.84573	1.68e-06	1.77e-05	4.66967
WDR77	16.51	21.9181	4.84527	1.68e-06	1.77e-05	4.66757
SLC28A2	-10.34	2.14785	-4.84519	1.68e-06	1.77e-05	4.66722
PRKAR2B	-3.25564	1.69745	-4.84223	1.71e-06	1.79e-05	4.65372
C12orf73	1.68694	2.93813	4.83901	1.73e-06	1.82e-05	4.63908
YTHDF1	18.1852	31.752	4.83823	1.74e-06	1.83e-05	4.63552
SNRPA	18.7958	37.861	4.83794	1.74e-06	1.83e-05	4.63421
PSRC1	3.64569	5.24942	4.83684	1.75e-06	1.84e-05	4.62918
CSTF1	5.54704	10.5538	4.83682	1.75e-06	1.84e-05	4.62911
E2F6	1.55743	2.95295	4.83608	1.76e-06	1.84e-05	4.62572
POLR1A	3.85291	6.98188	4.83561	1.76e-06	1.84e-05	4.62359
MARS	10.0485	19.6288	4.83443	1.77e-06	1.85e-05	4.61823
APC	-1.85857	1.92002	-4.83335	1.78e-06	1.86e-05	4.61331
UQCRFS1	-15.8477	26.4659	-4.83277	1.79e-06	1.87e-05	4.61068
SNAP29	-2.80409	7.23018	-4.83239	1.79e-06	1.87e-05	4.60897
WLS	-10.2636	16.0204	-4.82628	1.84e-06	1.92e-05	4.58119
TRMU	2.20771	3.85021	4.82627	1.84e-06	1.92e-05	4.58113
NOLC1	28.4812	47.0618	4.82567	1.85e-06	1.92e-05	4.57841
RPL7L1	9.33248	17.3173	4.82553	1.85e-06	1.92e-05	4.57776
SFXN1	-4.78184	7.85314	-4.82548	1.85e-06	1.92e-05	4.57755
IGHV1-18	-243.448	86.4913	-4.82536	1.85e-06	1.92e-05	4.57703
ITM2A	-7.68799	3.63115	-4.82524	1.85e-06	1.92e-05	4.57646
DHODH	1.33832	2.59823	4.8206	1.89e-06	1.97e-05	4.55544
GTSE1	3.71179	5.43193	4.81681	1.93e-06	2e-05	4.53822
TENT5A	-6.09475	4.94263	-4.81674	1.93e-06	2e-05	4.5379
IPO9	3.35239	7.41753	4.81613	1.94e-06	2e-05	4.53514
RPP40	3.4225	4.89756	4.81541	1.94e-06	2.01e-05	4.53189
CENPN	3.7046	5.58891	4.81197	1.97e-06	2.04e-05	4.5163
NBR1	-11.5818	21.0424	-4.8116	1.98e-06	2.04e-05	4.51463
SLIT3	-2.70999	1.08007	-4.81127	1.98e-06	2.05e-05	4.51314
UMPS	2.71934	6.46912	4.80992	1.99e-06	2.06e-05	4.50703
C17orf53	1.89683	2.7047	4.80861	2.01e-06	2.07e-05	4.50108
MTHFD2	15.4291	20.9088	4.80839	2.01e-06	2.07e-05	4.5001
POLR3E	3.18754	6.08193	4.80827	2.01e-06	2.07e-05	4.49956
GPR108	-11.1048	20.0314	-4.80753	2.02e-06	2.08e-05	4.49621
ABCG1	-6.09078	6.58149	-4.80714	2.02e-06	2.08e-05	4.49443
RPF2	6.34374	10.1568	4.80627	2.03e-06	2.08e-05	4.49049
MEF2C	-1.50478	1.10773	-4.80577	2.03e-06	2.09e-05	4.48824
WDR46	10.6383	21.2454	4.80541	2.04e-06	2.09e-05	4.48663
SRSF7	15.2773	35.8339	4.80503	2.04e-06	2.09e-05	4.4849
IGHV3-13	-30.7325	7.78656	-4.80032	2.09e-06	2.14e-05	4.46362
PGAM5	15.7485	26.4385	4.7993	2.1e-06	2.15e-05	4.45898
AEN	5.59496	8.41903	4.79857	2.11e-06	2.15e-05	4.45568
ZC3HAV1L	4.00525	4.83252	4.79793	2.11e-06	2.16e-05	4.45282
PAQR4	9.2045	12.0336	4.79707	2.12e-06	2.17e-05	4.44894
RSL1D1	20.4734	36.3888	4.79476	2.14e-06	2.19e-05	4.4385
MSANTD3	2.99023	4.92163	4.79336	2.16e-06	2.2e-05	4.43218
PECR	-2.8614	3.62222	-4.78699	2.22e-06	2.27e-05	4.40344
OSBPL11	-2.39968	4.669	-4.78534	2.24e-06	2.29e-05	4.39603
THSD4	-1.36907	1.41476	-4.78446	2.25e-06	2.29e-05	4.39206
ZNF485	1.3726	1.9771	4.78382	2.26e-06	2.3e-05	4.38917
DLGAP4	7.18006	13.4598	4.7816	2.28e-06	2.32e-05	4.3792
CBX4	11.3933	15.8487	4.77984	2.3e-06	2.34e-05	4.37127
SPOUT1	4.27719	9.27033	4.77927	2.31e-06	2.34e-05	4.36868
DPH7	3.68972	6.17758	4.77881	2.31e-06	2.35e-05	4.36663
WDR59	1.93964	4.77529	4.77859	2.32e-06	2.35e-05	4.36564
PCP4L1	-1.2111	0.295269	-4.77548	2.35e-06	2.38e-05	4.35162
SERINC2	-67.0043	73.6923	-4.77498	2.36e-06	2.39e-05	4.34941
DARS	16.4125	28.1603	4.77375	2.37e-06	2.4e-05	4.34384
RAE1	8.22133	12.0795	4.77327	2.37e-06	2.4e-05	4.34171
BDH2	-4.16439	4.41877	-4.76937	2.42e-06	2.45e-05	4.32418
SLC38A7	1.81374	3.64414	4.76828	2.43e-06	2.46e-05	4.31928
NCAPG2	4.35299	6.68032	4.76732	2.44e-06	2.46e-05	4.31496
RNASEH2A	16.2179	23.7466	4.76705	2.45e-06	2.47e-05	4.31378
IGHV1OR21-1	-1.93077	0.67621	-4.76481	2.47e-06	2.49e-05	4.30372
BDH1	-6.58446	9.35079	-4.76354	2.49e-06	2.5e-05	4.29801
AGAP3	4.84083	8.44417	4.76164	2.51e-06	2.52e-05	4.28951
CTU2	4.21731	6.68096	4.76149	2.51e-06	2.52e-05	4.2888
PTPN9	-2.36156	5.65653	-4.76133	2.51e-06	2.52e-05	4.28809
POC5	1.74868	3.13191	4.76102	2.52e-06	2.53e-05	4.28673
TNF	-1.15352	0.746087	-4.76071	2.52e-06	2.53e-05	4.28533
WDCP	1.27853	2.48681	4.76063	2.52e-06	2.53e-05	4.28495
YEATS2	2.61569	4.7142	4.75564	2.58e-06	2.59e-05	4.26258
TMEM161A	11.1208	16.167	4.75494	2.59e-06	2.59e-05	4.25946
OR2A7	-1.02644	0.691244	-4.75374	2.61e-06	2.61e-05	4.25407
ODF2	4.48152	8.47368	4.74846	2.67e-06	2.67e-05	4.23045
PMM1	-4.63084	6.21279	-4.74634	2.7e-06	2.7e-05	4.22098
NUP62	6.47485	15.1728	4.74478	2.72e-06	2.71e-05	4.21401
PDCD2	5.43022	10.845	4.7437	2.73e-06	2.73e-05	4.20918
TP53INP1	-4.48731	4.2096	-4.74184	2.76e-06	2.75e-05	4.20084
ACP1	11.8834	27.1854	4.74078	2.77e-06	2.76e-05	4.19612
FBP1	-40.1826	31.0586	-4.74071	2.77e-06	2.76e-05	4.19581
CCT5	23.6394	48.5492	4.74043	2.78e-06	2.76e-05	4.19454
MFSD12	9.97793	13.5832	4.73863	2.8e-06	2.78e-05	4.1865
WDR4	6.8292	9.2782	4.73382	2.86e-06	2.84e-05	4.16503
ITIH5	-2.48811	1.44739	-4.73366	2.87e-06	2.85e-05	4.16434
SFPQ	17.1569	43.0058	4.7333	2.87e-06	2.85e-05	4.16274
DDX19A	2.10094	5.09059	4.73109	2.9e-06	2.88e-05	4.15289
TPM2	-61.0411	35.533	-4.72765	2.95e-06	2.92e-05	4.13752
PNPT1	6.24208	10.1302	4.72362	3e-06	2.98e-05	4.11957
PLXNA1	6.22085	8.63075	4.72239	3.02e-06	2.99e-05	4.1141
ANKS6	3.29615	5.54639	4.72058	3.05e-06	3.01e-05	4.10606
PPA1	40.8807	68.0903	4.72056	3.05e-06	3.01e-05	4.10596
ARMH3	-2.56092	7.03765	-4.71563	3.12e-06	3.08e-05	4.08402
NCAPH	5.65566	8.77588	4.71166	3.18e-06	3.14e-05	4.06642
CHCHD6	4.10762	6.31102	4.71074	3.19e-06	3.15e-05	4.06232
DDX21	24.8841	38.3113	4.70895	3.22e-06	3.17e-05	4.05436
IGHV3-66	-27.2905	7.09492	-4.70701	3.25e-06	3.2e-05	4.04576
SLC35B3	-8.47956	15.7361	-4.70649	3.26e-06	3.21e-05	4.04346
TTC7A	-3.48754	5.77575	-4.70511	3.28e-06	3.22e-05	4.03732
BUB1	4.88492	7.21495	4.70506	3.28e-06	3.22e-05	4.03712
FXYD5	36.2166	43.2769	4.70399	3.29e-06	3.24e-05	4.03237
AC002310.6	-1.36142	1.50168	-4.7031	3.31e-06	3.25e-05	4.0284
USP30	-1.81179	4.02022	-4.70258	3.32e-06	3.25e-05	4.0261
CDCA4	8.2723	11.9117	4.7022	3.32e-06	3.26e-05	4.0244
EMC8	5.43529	10.9961	4.70216	3.32e-06	3.26e-05	4.02424
ACADVL	-36.1405	56.55	-4.70118	3.34e-06	3.27e-05	4.0199
RHOF	-1.62512	0.981137	-4.70087	3.34e-06	3.27e-05	4.01851
GIMAP8	-2.24889	1.62581	-4.69939	3.37e-06	3.29e-05	4.01194
SUV39H2	2.81398	4.36527	4.69898	3.37e-06	3.3e-05	4.01013
ZC3H8	1.61535	2.44257	4.69867	3.38e-06	3.3e-05	4.00879
TEAD4	14.6824	14.1104	4.69818	3.39e-06	3.31e-05	4.00658
DAP3	10.6471	25.9991	4.69707	3.4e-06	3.32e-05	4.00167
DESI1	6.46495	13.3029	4.69706	3.4e-06	3.32e-05	4.00166
PRELID2	-2.50183	3.11619	-4.6961	3.42e-06	3.33e-05	3.99739
TFCP2L1	-8.2759	7.57142	-4.69596	3.42e-06	3.33e-05	3.99678
FXYD6	-3.81771	1.95938	-4.69394	3.45e-06	3.36e-05	3.98782
HEATR1	4.06633	6.28563	4.69377	3.46e-06	3.36e-05	3.98705
GPATCH4	6.5421	10.9359	4.6904	3.51e-06	3.41e-05	3.97215
MARCKSL1	114.284	220.418	4.68794	3.55e-06	3.45e-05	3.96127
SIGLEC1	-1.9917	1.09947	-4.68739	3.56e-06	3.45e-05	3.95885
IGHV3-38	-3.97121	1.00728	-4.68654	3.58e-06	3.47e-05	3.95507
RETREG2	-7.32464	19.6569	-4.68624	3.58e-06	3.47e-05	3.95379
NIT2	3.22923	5.84319	4.68518	3.6e-06	3.48e-05	3.94907
PPP1R36	-1.53357	1.23352	-4.68455	3.61e-06	3.49e-05	3.94631
MET	19.7427	25.1366	4.68351	3.63e-06	3.5e-05	3.94171
PRMT3	3.56821	5.16731	4.68301	3.64e-06	3.51e-05	3.93949
RACGAP1	9.65351	16.019	4.68237	3.65e-06	3.52e-05	3.93668
DHDH	-4.58846	1.52103	-4.68148	3.66e-06	3.53e-05	3.93276
LRP8	2.3256	2.50998	4.68121	3.67e-06	3.53e-05	3.93152
MCM7	39.3915	62.1684	4.68004	3.69e-06	3.55e-05	3.92638
AOC3	-12.9912	5.53674	-4.67998	3.69e-06	3.55e-05	3.92611
GEMIN5	3.23156	5.97203	4.67336	3.8e-06	3.66e-05	3.89692
PPP1R14B	27.0148	50.2058	4.67199	3.83e-06	3.68e-05	3.89088
CIAO1	6.64372	21.9507	4.66816	3.9e-06	3.74e-05	3.87398
IMPA1	-6.31765	7.65959	-4.66815	3.9e-06	3.74e-05	3.87396
DMD	-1.29982	0.739824	-4.66813	3.9e-06	3.74e-05	3.87387
RABEPK	6.12019	10.6855	4.66798	3.9e-06	3.74e-05	3.87318
TROAP	5.88353	7.38819	4.66565	3.94e-06	3.78e-05	3.86295
2021-03-09	3.53279	6.35896	4.66538	3.95e-06	3.78e-05	3.86174
KARS	21.7532	54.9318	4.66531	3.95e-06	3.78e-05	3.86143
UTP25	1.97047	3.6376	4.66317	3.99e-06	3.81e-05	3.85205
PCSK7	-1.8158	2.40309	-4.66179	4.01e-06	3.84e-05	3.84595
CDCA8	12.0076	20.3436	4.66131	4.02e-06	3.84e-05	3.84383
UBE2O	3.7928	7.96263	4.66	4.05e-06	3.86e-05	3.83808
GORASP2	8.09321	27.7979	4.6596	4.05e-06	3.87e-05	3.83631
PAICS	19.5949	30.5005	4.65661	4.11e-06	3.92e-05	3.82316
IGHV3-35	-6.77977	1.62325	-4.65642	4.12e-06	3.92e-05	3.82234
URB1	3.10962	5.10958	4.65619	4.12e-06	3.92e-05	3.82134
CEP89	1.34562	2.84575	4.65568	4.13e-06	3.93e-05	3.81911
LGI4	-2.02028	0.966165	-4.65332	4.17e-06	3.97e-05	3.80873
GHR	-1.0427	0.474892	-4.65292	4.18e-06	3.98e-05	3.80697
RAD18	2.34041	3.91521	4.65258	4.19e-06	3.98e-05	3.80549
CD36	-4.25058	0.967307	-4.65246	4.19e-06	3.98e-05	3.80495
RNF8	1.77743	3.69613	4.6507	4.23e-06	4.01e-05	3.79721
USP39	7.15455	18.3098	4.64902	4.26e-06	4.04e-05	3.78985
TUBB	91.4179	200.844	4.64654	4.31e-06	4.08e-05	3.77896
SEC23A	-5.25939	8.02556	-4.6438	4.36e-06	4.13e-05	3.76698
GRIN2D	8.41033	8.59518	4.64334	4.37e-06	4.14e-05	3.76495
LYAR	10.3742	14.6098	4.64139	4.41e-06	4.17e-05	3.7564
NFXL1	2.30794	3.98077	4.64116	4.42e-06	4.18e-05	3.75537
NUP37	5.97353	10.3891	4.64055	4.43e-06	4.19e-05	3.75272
TRMT112	45.5252	74.6239	4.64006	4.44e-06	4.19e-05	3.75058
UAP1	-13.8018	22.8798	-4.63846	4.47e-06	4.22e-05	3.74355
PDCD11	6.26801	11.0612	4.63827	4.48e-06	4.22e-05	3.74274
DENND2A	-1.88813	1.7498	-4.63716	4.5e-06	4.24e-05	3.73789
C1orf112	1.29332	1.95853	4.63692	4.51e-06	4.24e-05	3.73683
NKRF	3.21676	4.83337	4.63517	4.54e-06	4.27e-05	3.72917
TPD52L2	21.9499	39.3001	4.63511	4.54e-06	4.27e-05	3.72888
TTI1	7.32492	11.1577	4.63416	4.56e-06	4.29e-05	3.72474
XRCC2	1.78741	2.07926	4.6328	4.59e-06	4.31e-05	3.71877
ZNF692	5.04646	6.75269	4.63258	4.6e-06	4.32e-05	3.71784
SORD	6.4785	9.46505	4.63165	4.62e-06	4.33e-05	3.71378
AFMID	4.44243	7.94093	4.63142	4.62e-06	4.33e-05	3.71277
PRAP1	-117.874	74.2196	-4.63094	4.63e-06	4.34e-05	3.71066
CAPN10	2.06823	3.79799	4.62937	4.67e-06	4.37e-05	3.7038
C12orf66	1.09292	1.87248	4.62809	4.69e-06	4.39e-05	3.69819
SLC7A7	-7.27051	5.04858	-4.62734	4.71e-06	4.41e-05	3.69493
IL4R	-7.73984	15.2409	-4.62711	4.71e-06	4.41e-05	3.69393
EIF2S2	37.8928	60.7353	4.62544	4.75e-06	4.44e-05	3.68665
WWP2	-4.4236	10.3689	-4.62119	4.85e-06	4.52e-05	3.66806
HAND1	-4.23223	0.67621	-4.62029	4.87e-06	4.54e-05	3.66416
SECISBP2L	-2.75704	3.47053	-4.61862	4.9e-06	4.57e-05	3.65686
CENPA	4.59829	6.41054	4.61807	4.92e-06	4.58e-05	3.65446
TEP1	-3.25958	4.37789	-4.61757	4.93e-06	4.59e-05	3.65228
TNPO2	6.68985	13.7166	4.61744	4.93e-06	4.59e-05	3.6517
KDM1A	13.915	23.7013	4.61649	4.95e-06	4.61e-05	3.64757
CCT4	47.5759	86.1758	4.61639	4.95e-06	4.61e-05	3.64712
CLIP3	-4.35738	2.92984	-4.61491	4.99e-06	4.64e-05	3.6407
FOXK2	2.95834	6.81846	4.60999	5.1e-06	4.74e-05	3.61927
IGHV4-28	-30.9926	9.86763	-4.60958	5.11e-06	4.74e-05	3.61746
ZFP3	-1.32667	1.50455	-4.60903	5.13e-06	4.75e-05	3.61509
NPTN	-12.5928	26.1066	-4.60636	5.19e-06	4.81e-05	3.60344
INPP5K	-3.50044	5.87444	-4.60606	5.2e-06	4.81e-05	3.60213
DPH2	9.97796	17.2673	4.60525	5.22e-06	4.83e-05	3.59863
PER3	-1.56612	1.1404	-4.60462	5.23e-06	4.84e-05	3.59589
TCEAL7	-1.83184	1.15553	-4.60173	5.3e-06	4.9e-05	3.58331
CDC42BPG	-4.73198	6.43013	-4.60153	5.31e-06	4.9e-05	3.58246
PBX1	-2.43232	2.08104	-4.6013	5.31e-06	4.91e-05	3.58143
GTPBP3	3.28056	5.6352	4.60013	5.34e-06	4.93e-05	3.57638
DAZAP2	-19.6299	53.1889	-4.59956	5.35e-06	4.94e-05	3.57389
ZFAND2B	-4.75392	10.184	-4.59796	5.39e-06	4.97e-05	3.56695
MKNK2	-21.2073	37.7878	-4.59644	5.43e-06	5e-05	3.56032
ADGRG1	22.1187	32.4954	4.5964	5.43e-06	5e-05	3.56018
FARSA	21.5692	46.005	4.59515	5.46e-06	5.03e-05	3.55472
CHMP6	-4.86663	10.0237	-4.59487	5.47e-06	5.03e-05	3.55352
FEZ2	-2.11696	3.61763	-4.59482	5.47e-06	5.03e-05	3.5533
METTL3	2.77758	5.56479	4.59481	5.47e-06	5.03e-05	3.55328
TCOF1	6.18032	9.31705	4.59353	5.51e-06	5.05e-05	3.54771
MAGI1	-1.64343	2.5218	-4.59324	5.51e-06	5.06e-05	3.54643
PHF19	4.95279	8.30055	4.59197	5.55e-06	5.08e-05	3.54092
CYP27A1	-19.9353	16.2338	-4.5919	5.55e-06	5.08e-05	3.54063
EEF1E1	3.95083	5.68137	4.58935	5.61e-06	5.14e-05	3.52956
RCC1	13.9873	24.0971	4.58901	5.62e-06	5.14e-05	3.52809
KPNA2	28.5769	46.3504	4.58895	5.62e-06	5.14e-05	3.52785
CPA3	-7.6291	4.45373	-4.58838	5.64e-06	5.15e-05	3.52534
ABCE1	9.52671	15.4683	4.5869	5.68e-06	5.18e-05	3.51896
WDR5	10.0087	20.8489	4.5852	5.72e-06	5.22e-05	3.51158
SHCBP1	2.35158	3.5644	4.58507	5.72e-06	5.22e-05	3.51101
EFTUD2	6.02723	14.8365	4.58474	5.73e-06	5.23e-05	3.50961
HDAC2	4.76761	9.41845	4.58345	5.77e-06	5.25e-05	3.50399
SET	45.7939	89.0703	4.58323	5.77e-06	5.26e-05	3.50305
ZC3HC1	2.09073	5.11103	4.58151	5.82e-06	5.3e-05	3.4956
KNOP1	1.69821	3.46904	4.5801	5.86e-06	5.33e-05	3.48952
RFC4	5.63906	8.6793	4.57745	5.93e-06	5.39e-05	3.47805
LHFPL2	-4.17774	5.72927	-4.57724	5.93e-06	5.39e-05	3.47714
C14orf132	-1.35598	0.709652	-4.57706	5.94e-06	5.39e-05	3.47633
BCL2L12	8.18545	12.9556	4.57683	5.94e-06	5.39e-05	3.47533
ANLN	8.6006	10.5587	4.57557	5.98e-06	5.42e-05	3.46991
URAD	-19.8422	8.16399	-4.57535	5.99e-06	5.42e-05	3.46894
ASAP2	-2.7833	4.16674	-4.57317	6.05e-06	5.48e-05	3.45953
PCGF1	2.52533	5.97311	4.57202	6.08e-06	5.5e-05	3.45455
TMEM63B	-10.0929	14.7583	-4.57087	6.11e-06	5.53e-05	3.44957
SRRT	12.7055	30.7555	4.5686	6.17e-06	5.58e-05	3.43978
FTH1P20	-4.1338	2.93899	-4.5685	6.18e-06	5.58e-05	3.43936
IGLV3-10	-101.294	33.3142	-4.56849	6.18e-06	5.58e-05	3.43932
CDC45	6.24142	8.27274	4.56653	6.23e-06	5.62e-05	3.43086
CCDC137	6.7276	12.7451	4.56634	6.24e-06	5.63e-05	3.43002
PCID2	6.46725	10.2327	4.56614	6.24e-06	5.63e-05	3.42917
BPNT1	-11.2551	16.9746	-4.56428	6.3e-06	5.67e-05	3.42113
LSM8	3.38719	5.86923	4.56367	6.31e-06	5.69e-05	3.4185
TRMT11	3.7366	6.36741	4.56176	6.37e-06	5.73e-05	3.41026
SGPP1	-4.34447	5.13592	-4.56041	6.41e-06	5.76e-05	3.40446
TAOK3	-2.57799	5.14896	-4.55894	6.45e-06	5.8e-05	3.39809
ATG4D	-8.24863	12.0492	-4.55737	6.5e-06	5.84e-05	3.39134
SCG2	-3.4907	1.39969	-4.55504	6.57e-06	5.9e-05	3.3813
MIER2	2.90889	6.10378	4.55415	6.6e-06	5.92e-05	3.37749
SVEP1	-1.38698	0.793669	-4.55259	6.64e-06	5.96e-05	3.37074
SNRNP70	20.3144	40.3905	4.55243	6.65e-06	5.96e-05	3.37006
SAMD9	-5.75281	3.24512	-4.55231	6.65e-06	5.96e-05	3.36957
PFDN2	49.015	79.2754	4.55188	6.66e-06	5.96e-05	3.36771
SMARCC1	12.779	26.8501	4.55127	6.68e-06	5.98e-05	3.36506
RFC3	11.0373	14.0458	4.54827	6.77e-06	6.06e-05	3.35216
NEK2	6.62724	9.54763	4.54687	6.82e-06	6.09e-05	3.34615
MRPL35	-6.31847	13.6743	-4.54307	6.94e-06	6.19e-05	3.32984
FAM8A1	-6.33897	9.58236	-4.54307	6.94e-06	6.19e-05	3.32983
DHX34	5.21309	7.58209	4.53728	7.12e-06	6.35e-05	3.30498
GATD1	8.03019	14.4047	4.53507	7.19e-06	6.41e-05	3.29547
SPTBN2	4.46823	4.89655	4.53449	7.21e-06	6.42e-05	3.29298
WRAP73	2.03959	4.2981	4.53383	7.24e-06	6.44e-05	3.29015
PVR	13.3505	22.7986	4.53281	7.27e-06	6.46e-05	3.28578
AP5M1	-2.13685	3.48101	-4.5326	7.28e-06	6.47e-05	3.28491
DFFB	1.89868	3.7536	4.5307	7.34e-06	6.51e-05	3.27675
UBE2C	61.7282	75.802	4.53057	7.34e-06	6.51e-05	3.2762
RFC2	9.01084	17.8673	4.53055	7.34e-06	6.51e-05	3.2761
RRP7BP	1.03025	1.4896	4.53039	7.35e-06	6.51e-05	3.27542
ALAS1	-17.406	32.6478	-4.53037	7.35e-06	6.51e-05	3.27534
MCM3	29.9984	50.2045	4.52986	7.37e-06	6.53e-05	3.27317
POLA2	3.08452	5.74975	4.5272	7.46e-06	6.6e-05	3.26177
RFT1	2.41391	5.66976	4.52711	7.46e-06	6.6e-05	3.26137
FBXO8	-2.83893	5.99377	-4.52697	7.46e-06	6.6e-05	3.26077
ANKRD13D	2.6763	4.38639	4.52436	7.55e-06	6.67e-05	3.24959
TAF1A	1.63848	2.27634	4.52075	7.68e-06	6.78e-05	3.23415
SAPCD2	17.9651	21.8693	4.52061	7.68e-06	6.78e-05	3.23357
TDRD7	-4.2297	7.74062	-4.51894	7.74e-06	6.83e-05	3.22641
ACP6	1.31011	2.3461	4.51439	7.9e-06	6.97e-05	3.20698
TPX2	31.7507	40.8778	4.51352	7.93e-06	6.99e-05	3.20326
IGKV3-15	-125.286	57.306	-4.5129	7.96e-06	7.01e-05	3.20062
BEX4	-10.1093	6.0096	-4.5116	8e-06	7.04e-05	3.19506
ACTR5	4.44067	7.37965	4.51124	8.02e-06	7.05e-05	3.19354
LIPA	-14.1464	16.1466	-4.51122	8.02e-06	7.05e-05	3.19343
FAS	-4.71059	4.55935	-4.5105	8.04e-06	7.07e-05	3.19036
DNAJA3	7.14284	15.2432	4.51019	8.06e-06	7.07e-05	3.18902
EXOSC5	19.5384	29.0567	4.50791	8.14e-06	7.14e-05	3.17932
SPATA33	1.37194	2.16814	4.50631	8.2e-06	7.19e-05	3.17249
CD276	10.8383	17.4942	4.50547	8.23e-06	7.21e-05	3.16889
FAM214B	-3.03011	3.61883	-4.50349	8.3e-06	7.27e-05	3.16048
TRIT1	4.68373	8.92816	4.50256	8.34e-06	7.3e-05	3.1565
PES1	14.0336	26.1345	4.5013	8.39e-06	7.34e-05	3.15113
AGTRAP	10.9026	16.997	4.49953	8.45e-06	7.39e-05	3.14358
CPOX	4.53917	9.0163	4.49895	8.48e-06	7.41e-05	3.14114
NPRL3	5.16245	8.67631	4.49842	8.5e-06	7.42e-05	3.13888
GZMA	-14.5755	7.03564	-4.49759	8.53e-06	7.44e-05	3.13535
UTP6	4.01571	8.30243	4.49741	8.54e-06	7.45e-05	3.13458
SLC35D2	-14.8465	26.1913	-4.49728	8.54e-06	7.45e-05	3.13404
NSUN4	1.19644	3.10701	4.49698	8.55e-06	7.45e-05	3.13277
LTBP4	-19.1935	17.3036	-4.49689	8.56e-06	7.45e-05	3.13238
RP9P	2.58186	3.81361	4.49646	8.57e-06	7.46e-05	3.13052
INSL5	-6.45431	1.24987	-4.49638	8.58e-06	7.46e-05	3.13019
TBL2	6.68543	15.114	4.49624	8.58e-06	7.46e-05	3.12962
CERS5	1.91894	4.69555	4.49566	8.6e-06	7.48e-05	3.12713
CEP164	1.24075	2.23734	4.49527	8.62e-06	7.48e-05	3.12548
AAAS	5.19796	12.5879	4.49506	8.63e-06	7.49e-05	3.12458
C5orf34	1.13842	1.48509	4.49461	8.64e-06	7.5e-05	3.12266
RMND5A	-6.94619	12.8219	-4.49368	8.68e-06	7.53e-05	3.1187
DDX39A	19.2886	32.1151	4.49184	8.75e-06	7.58e-05	3.11088
NME1	18.6252	24.7848	4.48952	8.85e-06	7.66e-05	3.10102
TBC1D22A	-3.08704	8.08708	-4.48887	8.87e-06	7.68e-05	3.09825
TMEM231P1	-2.10353	1.01962	-4.48881	8.87e-06	7.68e-05	3.09803
PDZD3	-3.03569	2.22741	-4.48864	8.88e-06	7.68e-05	3.09727
GUCD1	-12.8807	27.452	-4.48857	8.88e-06	7.68e-05	3.09697
CDK5RAP1	5.48584	9.26656	4.48816	8.9e-06	7.68e-05	3.09524
FAM120AOS	-6.07166	12.8789	-4.48795	8.91e-06	7.69e-05	3.09437
ALYREF	35.2189	65.4099	4.4855	9.01e-06	7.77e-05	3.08396
E2F4	14.1622	31.6822	4.48377	9.08e-06	7.83e-05	3.0766
FOXF1	-5.12061	4.8996	-4.48123	9.18e-06	7.91e-05	3.06582
NUP205	6.12674	11.5818	4.48061	9.21e-06	7.93e-05	3.06319
ZCCHC7	4.08131	7.22185	4.48021	9.22e-06	7.94e-05	3.0615
TRIM65	5.69282	10.0099	4.47893	9.28e-06	7.98e-05	3.05608
P2RY2	-2.62433	2.65536	-4.4785	9.3e-06	7.99e-05	3.05427
KRT8P45	-3.19029	2.14622	-4.47828	9.3e-06	7.99e-05	3.05332
SSBP1	9.73989	18.4672	4.47795	9.32e-06	8e-05	3.05194
TAF1D	7.10928	9.59541	4.47199	9.57e-06	8.21e-05	3.02669
IKZF1	-1.51751	0.954632	-4.47054	9.63e-06	8.26e-05	3.02053
TOMM34	38.4229	51.0108	4.46896	9.7e-06	8.32e-05	3.01384
FAM241B	4.80993	6.27219	4.46466	9.89e-06	8.47e-05	2.99565
SOX4	22.3537	30.004	4.46183	1e-05	8.57e-05	2.98368
SPDL1	2.12195	3.30617	4.46104	1.01e-05	8.6e-05	2.98036
SLC7A6	2.28393	3.30365	4.46048	1.01e-05	8.62e-05	2.97798
SIM2	2.14846	2.1778	4.4581	1.02e-05	8.7e-05	2.96794
PITPNB	7.06112	15.9727	4.45804	1.02e-05	8.7e-05	2.96771
PCDH1	-15.4491	22.3547	-4.45744	1.02e-05	8.72e-05	2.96515
DOK4	-15.2132	22.1363	-4.45661	1.03e-05	8.75e-05	2.96164
SKA3	7.65829	9.34605	4.45563	1.03e-05	8.78e-05	2.95752
PTMA	177.649	378.051	4.45492	1.03e-05	8.8e-05	2.95453
CASP2	4.15837	8.57663	4.45385	1.04e-05	8.84e-05	2.95
NCAPD3	3.50027	6.07141	4.45319	1.04e-05	8.86e-05	2.94724
E2F3	3.46421	6.18963	4.45265	1.04e-05	8.88e-05	2.94494
RRP8	1.33994	3.50969	4.45192	1.05e-05	8.9e-05	2.94186
EBPL	22.0186	34.1697	4.45177	1.05e-05	8.9e-05	2.94126
TTLL4	2.9806	5.04512	4.45081	1.05e-05	8.94e-05	2.9372
FEM1C	-5.66562	6.74787	-4.44733	1.07e-05	9.07e-05	2.92254
HNRNPA1	70.679	160.084	4.44694	1.07e-05	9.08e-05	2.92088
NHP2	22.6382	44.8244	4.44685	1.07e-05	9.08e-05	2.9205
NIP7	7.73693	15.0956	4.4468	1.07e-05	9.08e-05	2.92029
METTL2B	2.26712	4.51009	4.44515	1.08e-05	9.14e-05	2.91335
RBMX2	5.64065	10.2748	4.44485	1.08e-05	9.15e-05	2.91207
BTG1	-14.9745	23.0839	-4.4417	1.1e-05	9.27e-05	2.89882
NUP35	2.36038	4.14378	4.44159	1.1e-05	9.27e-05	2.89835
RPN2	114.619	209.805	4.44126	1.1e-05	9.28e-05	2.89697
SMIM32	-5.43445	2.74561	-4.44106	1.1e-05	9.28e-05	2.89612
BRAT1	7.55354	13.1808	4.44067	1.1e-05	9.3e-05	2.89449
USP36	4.07365	7.77927	4.43817	1.11e-05	9.39e-05	2.88396
HSPD1	107.461	171.718	4.43797	1.11e-05	9.4e-05	2.88315
IGLL5	-51.9943	20.2967	-4.43744	1.12e-05	9.41e-05	2.8809
RCN1	14.5886	22.7712	4.43548	1.13e-05	9.49e-05	2.87268
ACOT11	-2.72836	3.33682	-4.43539	1.13e-05	9.49e-05	2.87229
VPS72	4.08452	10.6567	4.43401	1.13e-05	9.54e-05	2.8665
RGS2	-15.7668	10.1495	-4.43394	1.14e-05	9.54e-05	2.86619
CGREF1	7.19705	7.54461	4.43197	1.15e-05	9.62e-05	2.85794
EME1	1.19247	1.55221	4.43024	1.15e-05	9.69e-05	2.85065
NAP1L1	12.9447	20.3423	4.42917	1.16e-05	9.73e-05	2.84617
AARS	20.4752	40.946	4.4284	1.16e-05	9.76e-05	2.84294
BRINP3	-4.02856	0.391458	-4.42605	1.18e-05	9.86e-05	2.83307
NUP188	6.10711	11.6416	4.42593	1.18e-05	9.86e-05	2.83258
SLC20A2	-6.52807	9.70634	-4.42578	1.18e-05	9.86e-05	2.83194
YARS	8.59272	16.3273	4.42536	1.18e-05	9.87e-05	2.8302
CD96	-1.08928	0.768396	-4.42533	1.18e-05	9.87e-05	2.83006
TCEAL2	-1.63011	0.324155	-4.42473	1.18e-05	9.89e-05	2.82756
CFAP20	5.91485	14.7	4.42426	1.19e-05	9.9e-05	2.82559
ARHGAP42	-1.648	1.56613	-4.42373	1.19e-05	9.92e-05	2.82335
MRPL9	11.2474	26.9168	4.42062	1.2e-05	0.00010054	2.81031
SUSD2	-4.18092	1.32665	-4.41908	1.21e-05	0.000101175	2.80387
ZSWIM4	2.95948	4.48587	4.41861	1.22e-05	0.00010133	2.80191
NOP56	22.9907	32.9257	4.41841	1.22e-05	0.000101365	2.80108
TMEM41A	2.35855	5.18061	4.41674	1.23e-05	0.000102066	2.79408
UBE2T	19.436	26.6834	4.41643	1.23e-05	0.000102152	2.79278
RNF216P1	1.39757	2.82461	4.41523	1.23e-05	0.00010264	2.78777
RRP1B	5.91153	11.4001	4.4141	1.24e-05	0.000103105	2.78301
ILF2	41.7299	94.3539	4.41387	1.24e-05	0.000103151	2.78207
SLC39A10	5.08753	6.20213	4.41244	1.25e-05	0.000103754	2.77608
PTCD3	4.62641	9.70422	4.41218	1.25e-05	0.000103804	2.77501
PAK1IP1	8.69123	14.7653	4.41208	1.25e-05	0.000103804	2.7746
ATAD3B	3.17142	4.36066	4.41145	1.25e-05	0.000104039	2.77196
SPC24	3.81852	5.83884	4.41126	1.26e-05	0.000104069	2.77118
PRKACA	-3.82932	10.3508	-4.41042	1.26e-05	0.000104404	2.76764
CEP55	9.70874	13.3045	4.40994	1.26e-05	0.000104571	2.76563
CLBA1	1.61037	2.2634	4.40952	1.27e-05	0.000104708	2.76388
AKIP1	3.09553	7.91112	4.40815	1.27e-05	0.000105244	2.75816
HM13	18.0233	28.4237	4.40813	1.27e-05	0.000105244	2.75805
HACD3	11.8097	20.3417	4.40667	1.28e-05	0.000105838	2.75196
NR4A3	-2.38677	0.8835	-4.40309	1.3e-05	0.00010745	2.73702
BCS1L	4.80391	9.69913	4.40183	1.31e-05	0.000107995	2.73176
SSPN	-1.92205	1.51213	-4.40074	1.32e-05	0.000108437	2.72723
TGIF2	9.62324	12.0301	4.40054	1.32e-05	0.000108437	2.72639
ADAM33	-1.05873	0.590381	-4.40028	1.32e-05	0.000108463	2.72531
CMKLR1	-2.1909	1.54376	-4.40015	1.32e-05	0.000108463	2.72475
EXOSC8	6.8737	10.7613	4.40012	1.32e-05	0.000108463	2.72463
C1orf174	2.75123	6.65453	4.39803	1.33e-05	0.000109353	2.71593
DBF4B	1.11759	1.65796	4.39712	1.34e-05	0.000109737	2.71213
ABHD17C	-16.5658	31.0229	-4.3968	1.34e-05	0.000109834	2.71079
NAA15	3.87586	6.97165	4.39556	1.35e-05	0.000110378	2.70564
GRPEL2	3.8549	6.17973	4.39353	1.36e-05	0.00011132	2.69715
E2F1	12.1328	14.8805	4.39324	1.36e-05	0.000111402	2.69595
TEDC2	2.64888	3.48304	4.39291	1.36e-05	0.000111503	2.69459
TCF3	12.9456	23.7679	4.392	1.37e-05	0.000111896	2.69078
SORBS2	-1.91185	1.55849	-4.39015	1.38e-05	0.000112754	2.68309
DNAJC2	4.67195	7.00919	4.38962	1.38e-05	0.00011291	2.6809
PTTG1IP	-39.8303	84.6638	-4.38959	1.38e-05	0.00011291	2.68078
CPSF4	4.74567	8.80653	4.38901	1.39e-05	0.00011314	2.67836
CLSTN1	-27.7436	56.5392	-4.38786	1.39e-05	0.000113658	2.67357
ATP6V1F	69.6841	125.444	4.38755	1.4e-05	0.000113754	2.67227
DEF8	3.09489	7.1454	4.38729	1.4e-05	0.000113824	2.67118
FBXO41	2.45029	3.00678	4.38386	1.42e-05	0.000115502	2.65693
RERG	-1.53237	0.837384	-4.38327	1.42e-05	0.000115713	2.6545
TMA16	3.26623	6.29732	4.3832	1.42e-05	0.000115713	2.65421
TICAM1	-8.58306	15.0175	-4.3829	1.42e-05	0.000115807	2.65294
TBC1D1	-3.81285	6.22298	-4.38261	1.43e-05	0.000115892	2.65175
TMBIM1	-35.4661	62.3544	-4.38237	1.43e-05	0.000115955	2.65073
CLPB	2.95778	4.96469	4.38223	1.43e-05	0.000115966	2.65014
R3HDM4	17.1735	38.869	4.38167	1.43e-05	0.000116188	2.64784
MCM10	2.10118	2.80348	4.381	1.44e-05	0.000116474	2.64503
CDH17	-115.624	157.686	-4.3799	1.44e-05	0.000116979	2.64046
AURKA	14.0233	19.4525	4.37799	1.46e-05	0.000117907	2.63254
RNASEH1	3.14047	7.21058	4.37567	1.47e-05	0.000119056	2.62292
TBRG4	14.8812	28.0214	4.37329	1.49e-05	0.00012025	2.61305
ACTL6A	12.4258	23.5734	4.372	1.49e-05	0.000120871	2.60771
UBQLN4	7.44787	16.2728	4.37175	1.5e-05	0.000120943	2.60665
PLK1	11.2041	16.2673	4.37144	1.5e-05	0.000120979	2.60539
POLG2	1.81446	2.98521	4.37144	1.5e-05	0.000120979	2.60537
CEP83	1.38436	2.14502	4.37006	1.51e-05	0.000121652	2.59966
TMEM164	-8.0314	13.9956	-4.36864	1.52e-05	0.000122351	2.59378
RGL1	-2.47865	2.60505	-4.36706	1.53e-05	0.00012314	2.58724
HBB	-54.1441	15.1933	-4.36461	1.54e-05	0.000124412	2.57709
GIMAP7	-5.81884	4.13278	-4.36388	1.55e-05	0.000124747	2.57406
HDAC7	3.28549	6.51631	4.36301	1.56e-05	0.000125162	2.57045
LMNB2	22.0648	36.8411	4.36255	1.56e-05	0.000125341	2.56857
MAD2L2	5.56874	8.07247	4.36244	1.56e-05	0.000125341	2.56811
FANCA	2.0692	3.01188	4.36227	1.56e-05	0.000125369	2.5674
EXO1	2.7277	3.75447	4.36117	1.57e-05	0.000125912	2.56284
KIF23	3.31915	4.79918	4.35879	1.58e-05	0.000127171	2.553
JPT2	13.7289	32.5164	4.35772	1.59e-05	0.000127703	2.54859
TIMP1	179.615	204.861	4.35589	1.6e-05	0.00012867	2.541
GAS8	1.56122	3.19205	4.35426	1.62e-05	0.000129525	2.53429
VARS	15.7296	28.3206	4.35269	1.63e-05	0.000130355	2.5278
PRR11	4.53302	6.68701	4.35132	1.64e-05	0.000131075	2.52213
BCL2L2	-5.04297	9.55882	-4.35091	1.64e-05	0.00013124	2.52045
PKP2	-11.9889	19.0254	-4.34988	1.65e-05	0.000131768	2.51618
RAD54L	3.16712	4.50419	4.3468	1.67e-05	0.000133493	2.50348
C2orf15	1.58911	2.4786	4.34501	1.68e-05	0.000134477	2.49609
DNM2	-11.4636	22.9373	-4.34391	1.69e-05	0.000134982	2.49158
PATZ1	4.8647	9.28679	4.34272	1.7e-05	0.000135619	2.48667
DBF4	3.39925	5.18222	4.34211	1.7e-05	0.000135912	2.48415
C20orf194	-1.02655	0.648467	-4.34075	1.72e-05	0.000136655	2.47854
PYCR2	7.8452	16.5804	4.3397	1.72e-05	0.00013719	2.47421
TMEM120B	1.02321	1.99095	4.33952	1.72e-05	0.00013719	2.47348
PRPF19	30.3748	73.8502	4.3395	1.72e-05	0.00013719	2.47339
C1orf35	2.74833	5.07082	4.33932	1.73e-05	0.000137225	2.47266
GPN3	4.20305	8.14336	4.33899	1.73e-05	0.000137351	2.47131
NOL10	5.12383	11.4465	4.33668	1.75e-05	0.000138677	2.4618
IGHV3-48	-37.5406	16.1078	-4.33469	1.76e-05	0.000139818	2.45362
NAA25	2.26246	3.50381	4.33175	1.78e-05	0.000141429	2.44151
WDR5B	1.505	2.5547	4.33172	1.78e-05	0.000141429	2.44139
GNAI1	-2.99143	2.92443	-4.33148	1.79e-05	0.000141503	2.44041
IFRD2	16.2238	26.0313	4.33106	1.79e-05	0.000141644	2.43867
GNPTAB	-3.80044	6.49897	-4.33101	1.79e-05	0.000141644	2.43849
THOC3	2.62195	4.57443	4.33077	1.79e-05	0.000141722	2.43748
MOGS	10.9618	30.4501	4.3296	1.8e-05	0.000142377	2.43267
MIEF2	-1.48603	2.80677	-4.32927	1.8e-05	0.000142508	2.43131
UTP14A	8.3902	12.1193	4.32904	1.81e-05	0.000142577	2.43037
CENPO	1.53917	3.14286	4.32856	1.81e-05	0.000142761	2.4284
ADH6	-3.29391	2.09595	-4.3285	1.81e-05	0.000142761	2.42818
TCF7L1	-1.22748	1.33989	-4.32755	1.82e-05	0.000143282	2.42428
MCM2	13.8828	21.736	4.32725	1.82e-05	0.000143398	2.42303
NABP2	11.0607	25.8696	4.32704	1.82e-05	0.000143454	2.42218
PAXX	18.8307	30.4864	4.32685	1.82e-05	0.000143504	2.42136
MCM6	10.9103	19.7381	4.326	1.83e-05	0.000143961	2.41789
CXXC5	13.1441	23.4679	4.32477	1.84e-05	0.000144598	2.41285
R3HDM1	2.95224	5.67483	4.32475	1.84e-05	0.000144598	2.41277
CDC123	15.4214	35.5532	4.32455	1.84e-05	0.000144651	2.41194
SLC16A1	-17.4622	23.8418	-4.32211	1.86e-05	0.000146128	2.40192
KLHDC4	2.12355	4.06901	4.32129	1.87e-05	0.000146579	2.39854
CKAP5	8.59583	17.027	4.32104	1.87e-05	0.000146658	2.39755
DONSON	2.6182	4.42351	4.32076	1.87e-05	0.000146766	2.39638
MTTP	-9.97339	1.70843	-4.3202	1.88e-05	0.000147047	2.3941
PMS1	1.63711	2.95298	4.31982	1.88e-05	0.000147214	2.39255
FUS	12.9127	30.0764	4.31961	1.88e-05	0.000147256	2.39166
EIPR1	3.06962	6.93522	4.31952	1.88e-05	0.000147256	2.39131
BIRC5	14.0614	20.2325	4.31805	1.89e-05	0.00014813	2.38528
TBC1D30	1.35707	2.06253	4.31618	1.91e-05	0.000149264	2.37763
PDCD5	22.9989	34.0002	4.31417	1.93e-05	0.000150505	2.36938
LARP1	14.3227	33.0802	4.31382	1.93e-05	0.000150646	2.36795
MYBBP1A	8.9096	14.8302	4.31372	1.93e-05	0.000150646	2.36754
NDE1	2.70556	5.24239	4.31355	1.93e-05	0.000150682	2.36683
CBX3	35.185	54.6061	4.31296	1.94e-05	0.000150993	2.36442
EZR	-90.314	145.169	-4.30995	1.96e-05	0.000152907	2.35211
KIFC1	10.6006	16.5361	4.30767	1.98e-05	0.000154357	2.34278
MLKL	2.4604	5.14322	4.30385	2.02e-05	0.000156864	2.32718
GDE1	-12.1625	26.7034	-4.30329	2.02e-05	0.000157169	2.32488
RRM2	17.8302	25.2308	4.30204	2.03e-05	0.000157948	2.31976
DFFA	4.00315	9.25849	4.29896	2.06e-05	0.000159917	2.30717
CEP72	2.6637	3.3282	4.29882	2.06e-05	0.000159929	2.30663
RFK	-10.7118	14.1185	-4.29683	2.08e-05	0.000161241	2.29848
SMAP1	-2.15396	4.24144	-4.29658	2.08e-05	0.000161331	2.29748
NELFCD	17.397	26.1199	4.29539	2.09e-05	0.000162029	2.29264
CPSF6	5.52525	12.6239	4.29535	2.09e-05	0.000162029	2.29247
ABCC1	7.73224	12.7106	4.29445	2.1e-05	0.000162574	2.28879
EBNA1BP2	11.9676	23.6527	4.29434	2.1e-05	0.000162574	2.28836
SOX9	51.5707	68.5913	4.29357	2.11e-05	0.000163039	2.2852
FLNA	-106.656	70.901	-4.29196	2.12e-05	0.000164103	2.27863
MEST	10.8206	18.1358	4.29069	2.13e-05	0.000164842	2.27346
NOC4L	10.5767	18.8642	4.28987	2.14e-05	0.000165303	2.27011
SNAPC4	2.99747	5.373	4.28979	2.14e-05	0.000165303	2.26981
DNMT1	6.60731	11.8923	4.28969	2.14e-05	0.000165303	2.2694
ILK	-2.31473	3.60182	-4.28908	2.15e-05	0.000165605	2.26692
SPARCL1	-38.8387	21.893	-4.28904	2.15e-05	0.000165605	2.26674
SLC30A1	-6.76401	10.4241	-4.28643	2.17e-05	0.000167406	2.25612
PSMB2	12.1525	30.34	4.28616	2.18e-05	0.000167517	2.25502
TCF7	4.8364	6.14961	4.28562	2.18e-05	0.000167781	2.25281
PELO	2.28412	5.99113	4.28557	2.18e-05	0.000167781	2.25259
QTRT2	1.96723	4.25323	4.28388	2.2e-05	0.000168926	2.24574
C1orf198	6.91719	12.5369	4.283	2.21e-05	0.00016949	2.24214
ITM2B	-22.5402	35.7339	-4.28164	2.22e-05	0.000170407	2.23661
CD2AP	-11.6433	16.4421	-4.28145	2.22e-05	0.000170455	2.23587
CHEK1	2.99417	4.85891	4.28126	2.22e-05	0.000170512	2.23508
IGHD6-25	-2.34621	0.604863	-4.28017	2.23e-05	0.000171235	2.23064
PHYKPL	-3.23918	4.57944	-4.27866	2.25e-05	0.000172271	2.22451
ABCF2	7.52901	19.369	4.27799	2.25e-05	0.000172685	2.22178
CHAF1B	2.35964	3.5749	4.2775	2.26e-05	0.000172962	2.21981
MELK	7.61171	11.0442	4.27604	2.27e-05	0.000173975	2.21386
FTH1	-216.121	241.85	-4.27457	2.29e-05	0.000174995	2.20791
GIPC1	-28.2036	46.1278	-4.27441	2.29e-05	0.000175031	2.20724
FAXDC2	-2.69666	2.07087	-4.27278	2.31e-05	0.000176185	2.20061
DHCR7	19.4886	28.6156	4.27191	2.32e-05	0.000176757	2.19709
COA1	1.92751	3.39251	4.27152	2.32e-05	0.000176923	2.1955
MMS19	4.39962	11.763	4.27146	2.32e-05	0.000176923	2.19527
SRSF2	21.7187	51.8385	4.271	2.32e-05	0.000177189	2.19339
DTYMK	12.5563	20.8054	4.26649	2.37e-05	0.000180494	2.17513
CLNS1A	9.67878	22.5368	4.26628	2.37e-05	0.000180572	2.17425
RRP15	1.89453	3.30085	4.26592	2.38e-05	0.000180759	2.17281
P3H1	3.02574	4.41467	4.26228	2.41e-05	0.000183536	2.15805
RRS1	20.7312	30.3515	4.2611	2.43e-05	0.000184381	2.15327
KHK	-9.56153	7.1215	-4.26086	2.43e-05	0.000184482	2.15229
CYP3A5	-10.3843	7.91998	-4.26043	2.43e-05	0.000184733	2.15055
DDX51	2.8062	5.20342	4.26004	2.44e-05	0.00018495	2.14898
CCNB1	26.0943	37.2957	4.25877	2.45e-05	0.000185871	2.14385
IGHV4-39	-343.345	101.524	-4.25802	2.46e-05	0.000186386	2.14079
TTC27	3.65842	7.68249	4.25728	2.47e-05	0.000186884	2.13782
C19orf48	32.001	39.5731	4.25698	2.47e-05	0.00018696	2.1366
DDIAS	1.67297	2.03492	4.25696	2.47e-05	0.00018696	2.13651
FAM136A	9.36155	22.4424	4.25677	2.47e-05	0.000186972	2.13576
IQGAP3	9.03126	11.4254	4.25671	2.47e-05	0.000186972	2.13551
IMP4	11.2015	24.3895	4.2562	2.48e-05	0.000187288	2.13346
FANCI	4.76239	7.26458	4.256	2.48e-05	0.000187361	2.13263
MAD2L1	6.81822	9.37846	4.25507	2.49e-05	0.000188019	2.12887
RAD23A	17.9429	49.6193	4.25278	2.51e-05	0.000189787	2.11964
CDC42EP4	-6.87821	15.6265	-4.25162	2.53e-05	0.000190588	2.11492
PISD	3.1387	7.83528	4.25158	2.53e-05	0.000190588	2.11476
PSMG3	12.6974	21.8128	4.24891	2.56e-05	0.000192698	2.10398
OR7E14P	-2.58656	3.35644	-4.24841	2.56e-05	0.000193015	2.10197
GIMAP6	-3.23289	2.7895	-4.24645	2.58e-05	0.000194557	2.09405
BRIX1	6.01715	8.93556	4.24469	2.6e-05	0.000195882	2.08695
PLS3	8.99424	13.348	4.24464	2.6e-05	0.000195882	2.08676
SYNJ2BP	-3.34539	5.57804	-4.24062	2.65e-05	0.000199202	2.07055
CKAP2L	2.43255	3.34803	4.23876	2.67e-05	0.000200702	2.06305
SLBP	16.6283	32.756	4.2386	2.67e-05	0.000200746	2.06239
OLA1	11.9915	21.8393	4.23802	2.68e-05	0.000201147	2.06005
SLC35B2	19.2094	40.3739	4.23776	2.68e-05	0.000201274	2.059
SLC29A1	23.2355	32.1569	4.23742	2.69e-05	0.000201462	2.05766
AGK	2.26192	4.93582	4.23645	2.7e-05	0.000202097	2.05375
CDIP1	-4.39976	3.6616	-4.23638	2.7e-05	0.000202097	2.05346
WDR62	1.48366	1.90013	4.23635	2.7e-05	0.000202097	2.05332
ANKRD16	1.7159	3.31408	4.23483	2.72e-05	0.000203319	2.04721
PXYLP1	1.47121	2.85871	4.23444	2.72e-05	0.000203562	2.04563
NELFA	4.1011	9.57939	4.23429	2.72e-05	0.000203585	2.04506
LGALS9	-17.8329	24.7421	-4.2337	2.73e-05	0.000204005	2.04267
LASP1	-29.6857	57.4392	-4.23261	2.74e-05	0.000204767	2.03829
[truncated: 3,560 more rows]
