# Supplementary material for: Expression profile, molecular functions, and prognostic significance of miRNAs in primary colorectal cancer stem cells
Source: Aging (Albany NY). 2021 Apr 1;13(8):12067–85. doi: 10.18632/aging.202914 (PMC8109135; doi:10.18632/aging.202914)
Supplement: Supplementary Table 5 [file aging-13-202914-s006.xlsx]

## Sheet: Sheet1
Supplementary Table 5. The integrated target genes of pCRCSC-related miRNAs using the database and TCGA miRNA–mRNA pairs*.
miRNA	mRNA	Target	miR_logFC	mRNA_logFC
hsa-miR-142-3p	AFF1	target	4.59204	-3.72213
hsa-miR-142-3p	CALCOCO2	target	4.59204	-9.88007
hsa-miR-142-3p	CD1D	target	4.59204	-2.29974
hsa-miR-142-3p	CFL2	target	4.59204	-3.25293
hsa-miR-142-3p	DIRC2	target	4.59204	-3.55662
hsa-miR-142-3p	FAM114A1	target	4.59204	-4.83781
hsa-miR-142-3p	FAM177A1	target	4.59204	-2.84902
hsa-miR-142-3p	FOXF2	target	4.59204	-5.97218
hsa-miR-142-3p	FOXO4	target	4.59204	-6.92103
hsa-miR-142-3p	GAB1	target	4.59204	-2.35605
hsa-miR-142-3p	INPP5A	target	4.59204	-5.2238
hsa-miR-142-3p	KAT2B	target	4.59204	-4.89973
hsa-miR-142-3p	MGAT4A	target	4.59204	-10.6336
hsa-miR-142-3p	MYLK	target	4.59204	-18.9775
hsa-miR-142-3p	PGM1	target	4.59204	-31.5937
hsa-miR-142-3p	SLC38A4	target	4.59204	-2.34566
hsa-miR-142-3p	STX12	target	4.59204	-10.163
hsa-miR-142-3p	SYNJ2BP	target	4.59204	-3.34539
hsa-miR-142-3p	TAB2	target	4.59204	-7.81525
hsa-miR-142-3p	TMEM59	target	4.59204	-30.2704
hsa-miR-142-3p	WASL	target	4.59204	-19.785
hsa-miR-182-5p	A1CF	target	3.8511	-4.01451
hsa-miR-182-5p	AADAC	target	3.8511	-11.5433
hsa-miR-182-5p	ADH6	target	3.8511	-3.29391
hsa-miR-182-5p	ANK3	target	3.8511	-2.29744
hsa-miR-182-5p	APOL6	target	3.8511	-4.23317
hsa-miR-182-5p	ATP1B3	target	3.8511	-51.4405
hsa-miR-182-5p	B3GALT1	target	3.8511	-2.41365
hsa-miR-182-5p	BCL10	target	3.8511	-11.2896
hsa-miR-182-5p	BMP3	target	3.8511	-11.8944
hsa-miR-182-5p	C2orf72	target	3.8511	-6.99489
hsa-miR-182-5p	CAPN5	target	3.8511	-47.67
hsa-miR-182-5p	CD2AP	target	3.8511	-11.6433
hsa-miR-182-5p	CHMP2B	target	3.8511	-11.0916
hsa-miR-182-5p	CPXM2	target	3.8511	-4.14927
hsa-miR-182-5p	DAZAP2	target	3.8511	-19.6299
hsa-miR-182-5p	DQX1	target	3.8511	-3.83065
hsa-miR-182-5p	DSG2	target	3.8511	-26.8768
hsa-miR-182-5p	EDNRB	target	3.8511	-2.66422
hsa-miR-182-5p	EPAS1	target	3.8511	-24.3833
hsa-miR-182-5p	FOXF2	target	3.8511	-5.97218
hsa-miR-182-5p	FOXN3	target	3.8511	-4.89407
hsa-miR-182-5p	GIMAP8	target	3.8511	-2.24889
hsa-miR-182-5p	GK	target	3.8511	-4.43773
hsa-miR-182-5p	IGSF3	target	3.8511	-5.05523
hsa-miR-182-5p	INSR	target	3.8511	-3.97953
hsa-miR-182-5p	KIAA0513	target	3.8511	-5.09796
hsa-miR-182-5p	KITLG	target	3.8511	-2.88852
hsa-miR-182-5p	KLF13	target	3.8511	-11.2103
hsa-miR-182-5p	KTN1	target	3.8511	-5.95477
hsa-miR-182-5p	LMTK2	target	3.8511	-4.44894
hsa-miR-182-5p	MARCKS	target	3.8511	-51.1271
hsa-miR-182-5p	MGLL	target	3.8511	-28.4979
hsa-miR-182-5p	MLX	target	3.8511	-4.54724
hsa-miR-182-5p	NCOA1	target	3.8511	-3.38112
hsa-miR-182-5p	NPTX1	target	3.8511	-3.02693
hsa-miR-182-5p	NR5A2	target	3.8511	-6.04837
hsa-miR-182-5p	PAFAH1B1	target	3.8511	-7.05348
hsa-miR-182-5p	PALLD	target	3.8511	-9.01732
hsa-miR-182-5p	PC	target	3.8511	-3.92527
hsa-miR-182-5p	PDGFD	target	3.8511	-2.0291
hsa-miR-182-5p	PDGFRA	target	3.8511	-2.62486
hsa-miR-182-5p	PDK4	target	3.8511	-27.0052
hsa-miR-182-5p	PPM1A	target	3.8511	-4.50694
hsa-miR-182-5p	PRKACB	target	3.8511	-17.9843
hsa-miR-182-5p	RELL1	target	3.8511	-4.9694
hsa-miR-182-5p	RMND5A	target	3.8511	-6.94619
hsa-miR-182-5p	RSAD2	target	3.8511	-4.46143
hsa-miR-182-5p	SAR1B	target	3.8511	-3.24762
hsa-miR-182-5p	SGMS2	target	3.8511	-2.45184
hsa-miR-182-5p	SH3BGRL	target	3.8511	-17.3349
hsa-miR-182-5p	SH3BGRL2	target	3.8511	-25.9404
hsa-miR-182-5p	SLC30A1	target	3.8511	-6.76401
hsa-miR-182-5p	SLC35D1	target	3.8511	-13.3551
hsa-miR-182-5p	SLC35G1	target	3.8511	-2.78655
hsa-miR-182-5p	SNX30	target	3.8511	-2.00691
hsa-miR-182-5p	SNX4	target	3.8511	-4.74753
hsa-miR-182-5p	SORT1	target	3.8511	-7.69999
hsa-miR-182-5p	TMEM140	target	3.8511	-7.68565
hsa-miR-182-5p	TRPM6	target	3.8511	-15.5362
hsa-miR-182-5p	UGT2B17	target	3.8511	-322.234
hsa-miR-182-5p	WASL	target	3.8511	-19.785
hsa-miR-182-5p	WIPF2	target	3.8511	-5.81597
hsa-miR-598-3p	MSRB3	target	2.47629	-5.89229
hsa-miR-598-3p	SOS2	target	2.47629	-5.43207
hsa-miR-183-5p	A1CF	target	2.21513	-4.01451
hsa-miR-183-5p	AKAP12	target	2.21513	-5.01646
hsa-miR-183-5p	ARHGAP21	target	2.21513	-2.17419
hsa-miR-183-5p	ARHGEF18	target	2.21513	-2.13632
hsa-miR-183-5p	ATP2B4	target	2.21513	-10.4013
hsa-miR-183-5p	BTG1	target	2.21513	-14.9745
hsa-miR-183-5p	CPM	target	2.21513	-8.32056
hsa-miR-183-5p	CTDSP1	target	2.21513	-10.0371
hsa-miR-183-5p	EPB41L4B	target	2.21513	-20.3335
hsa-miR-183-5p	EZR	target	2.21513	-90.314
hsa-miR-183-5p	FCHO2	target	2.21513	-2.54454
hsa-miR-183-5p	GPR34	target	2.21513	-2.45976
hsa-miR-183-5p	IL6ST	target	2.21513	-5.59606
hsa-miR-183-5p	KCNMB1	target	2.21513	-3.50607
hsa-miR-183-5p	MBNL1	target	2.21513	-6.39394
hsa-miR-183-5p	MYO5B	target	2.21513	-9.89886
hsa-miR-183-5p	NTN4	target	2.21513	-2.33307
hsa-miR-183-5p	PAFAH2	target	2.21513	-9.27293
hsa-miR-183-5p	PCK2	target	2.21513	-35.8439
hsa-miR-183-5p	PEX19	target	2.21513	-3.51553
hsa-miR-183-5p	PPM1A	target	2.21513	-4.50694
hsa-miR-183-5p	PPP2CB	target	2.21513	-11.029
hsa-miR-183-5p	RELL1	target	2.21513	-4.9694
hsa-miR-183-5p	SEL1L	target	2.21513	-6.35154
hsa-miR-183-5p	SLC22A23	target	2.21513	-7.53493
hsa-miR-183-5p	SLC6A19	target	2.21513	-32.3347
hsa-miR-183-5p	SMCO4	target	2.21513	-6.33531
hsa-miR-183-5p	SNX1	target	2.21513	-2.61413
hsa-miR-183-5p	SOCS6	target	2.21513	-6.24969
hsa-miR-183-5p	SYNPO2	target	2.21513	-20.8437
hsa-miR-183-5p	TCF7L2	target	2.21513	-7.48079
hsa-miR-183-5p	YPEL5	target	2.21513	-8.57535
hsa-miR-338-3p	C1orf21	target	1.96583	-4.5441
hsa-miR-338-3p	CDH1	target	1.96583	-34.3103
hsa-miR-338-3p	CLMN	target	1.96583	-4.79374
hsa-miR-338-3p	GPD2	target	1.96583	-3.76479
hsa-miR-338-3p	GREM2	target	1.96583	-9.39412
hsa-miR-338-3p	HNF4G	target	1.96583	-10.7652
hsa-miR-338-3p	IDNK	target	1.96583	-2.39636
hsa-miR-338-3p	LCP1	target	1.96583	-11.198
hsa-miR-338-3p	LGALSL	target	1.96583	-4.08031
hsa-miR-338-3p	LRRC66	target	1.96583	-5.99374
hsa-miR-338-3p	MTUS1	target	1.96583	-4.00082
hsa-miR-338-3p	NHSL1	target	1.96583	-7.96659
hsa-miR-338-3p	NNT	target	1.96583	-3.58416
hsa-miR-338-3p	PDK4	target	1.96583	-27.0052
hsa-miR-338-3p	PLAC8	target	1.96583	-98.2344
hsa-miR-338-3p	PPARA	target	1.96583	-2.17991
hsa-miR-338-3p	PTEN	target	1.96583	-3.14548
hsa-miR-338-3p	RAB14	target	1.96583	-7.8136
hsa-miR-338-3p	SDCBP2	target	1.96583	-91.6702
hsa-miR-338-3p	SLC25A34	target	1.96583	-6.2973
hsa-miR-338-3p	SLC35G1	target	1.96583	-2.78655
hsa-miR-338-3p	SNAP29	target	1.96583	-2.80409
hsa-miR-338-3p	TAX1BP3	target	1.96583	-23.1194
hsa-miR-338-3p	TMCC3	target	1.96583	-15.3549
hsa-miR-223-3p	ARMCX1	target	1.91021	-2.94873
hsa-miR-223-3p	CALML4	target	1.91021	-3.83346
hsa-miR-223-3p	CLDN8	target	1.91021	-19.9536
hsa-miR-223-3p	FBXO8	target	1.91021	-2.83893
hsa-miR-223-3p	FEZ2	target	1.91021	-2.11696
hsa-miR-223-3p	FHL1	target	1.91021	-21.8154
hsa-miR-223-3p	FNIP2	target	1.91021	-3.59739
hsa-miR-223-3p	FOXO1	target	1.91021	-4.11314
hsa-miR-223-3p	IL6ST	target	1.91021	-5.59606
hsa-miR-223-3p	MED11	target	1.91021	-2.73057
hsa-miR-223-3p	MPP7	target	1.91021	-3.34495
hsa-miR-223-3p	MYO5B	target	1.91021	-9.89886
hsa-miR-223-3p	OGN	target	1.91021	-7.57771
hsa-miR-223-3p	PITPNA	target	1.91021	-5.07914
hsa-miR-223-3p	PPARA	target	1.91021	-2.17991
hsa-miR-223-3p	PRDM1	target	1.91021	-3.16984
hsa-miR-223-3p	RASSF6	target	1.91021	-3.41429
hsa-miR-223-3p	RRAS2	target	1.91021	-3.82422
hsa-miR-223-3p	SLC4A4	target	1.91021	-36.2809
hsa-miR-223-3p	SLC9A2	target	1.91021	-11.0798
hsa-miR-223-3p	SORBS1	target	1.91021	-7.59258
hsa-miR-223-3p	STIM1	target	1.91021	-6.81908
hsa-miR-223-3p	TRIM14	target	1.91021	-4.91571
hsa-miR-223-3p	TSPAN7	target	1.91021	-26.6977
hsa-miR-671-5p	BMP8B	target	1.60196	-2.81864
hsa-miR-671-5p	CMTM4	target	1.60196	-6.60813
hsa-miR-671-5p	CPNE2	target	1.60196	-3.65626
hsa-miR-671-5p	CSF2RB	target	1.60196	-2.90585
hsa-miR-671-5p	EPB41L4B	target	1.60196	-20.3335
hsa-miR-671-5p	HIGD1A	target	1.60196	-59.43
hsa-miR-671-5p	ITPK1	target	1.60196	-6.67225
hsa-miR-671-5p	KBTBD11	target	1.60196	-6.70456
hsa-miR-671-5p	KLF6	target	1.60196	-25.2585
hsa-miR-671-5p	PRR5L	target	1.60196	-8.2327
hsa-miR-671-5p	RIMKLA	target	1.60196	-2.34503
hsa-miR-671-5p	RNF185	target	1.60196	-4.89718
hsa-miR-671-5p	SASH3	target	1.60196	-4.78592
hsa-miR-671-5p	SATB2	target	1.60196	-7.82493
hsa-miR-671-5p	TMEM127	target	1.60196	-16.3346
hsa-miR-671-5p	TMEM164	target	1.60196	-8.0314
hsa-miR-671-5p	TRIM14	target	1.60196	-4.91571
hsa-miR-671-5p	TRIM25	target	1.60196	-6.43286
hsa-miR-671-5p	WASF2	target	1.60196	-9.72346
hsa-miR-671-5p	WSCD1	target	1.60196	-4.99877
hsa-miR-196b-5p	AUH	target	1.33719	-4.4691
hsa-miR-196b-5p	CCDC47	target	1.33719	-8.45213
hsa-miR-196b-5p	CD24	target	1.33719	-230.157
hsa-miR-196b-5p	CDC14A	target	1.33719	-3.30319
hsa-miR-196b-5p	EDNRB	target	1.33719	-2.66422
hsa-miR-196b-5p	LHFPL2	target	1.33719	-4.17774
hsa-miR-196b-5p	MRC1	target	1.33719	-3.84259
hsa-miR-196b-5p	NEDD4L	target	1.33719	-5.01125
hsa-miR-196b-5p	P2RY1	target	1.33719	-5.22627
hsa-miR-196b-5p	PBX1	target	1.33719	-2.43232
hsa-miR-196b-5p	PLD1	target	1.33719	-3.1322
hsa-miR-196b-5p	PLN	target	1.33719	-14.7407
hsa-miR-196b-5p	PRELID2	target	1.33719	-2.50183
hsa-miR-196b-5p	RAVER2	target	1.33719	-8.42577
hsa-miR-196b-5p	RNF10	target	1.33719	-5.72057
hsa-miR-196b-5p	SLC9A2	target	1.33719	-11.0798
hsa-miR-196b-5p	SNX24	target	1.33719	-2.43962
hsa-miR-196b-5p	SULT2A1	target	1.33719	-9.15052
hsa-miR-494-3p	A1CF	target	1.25549	-4.01451
hsa-miR-494-3p	ADRA2A	target	1.25549	-9.04466
hsa-miR-494-3p	AFF1	target	1.25549	-3.72213
hsa-miR-494-3p	AGAP1	target	1.25549	-2.19575
hsa-miR-494-3p	ANXA11	target	1.25549	-13.6766
hsa-miR-494-3p	ARHGAP44	target	1.25549	-6.85713
hsa-miR-494-3p	ASAP2	target	1.25549	-2.7833
hsa-miR-494-3p	ATP8A1	target	1.25549	-4.56769
hsa-miR-494-3p	BCHE	target	1.25549	-3.89844
hsa-miR-494-3p	BCL2L15	target	1.25549	-12.7917
hsa-miR-494-3p	CAMK2D	target	1.25549	-6.31554
hsa-miR-494-3p	CDH17	target	1.25549	-115.624
hsa-miR-494-3p	CMTM4	target	1.25549	-6.60813
hsa-miR-494-3p	CNST	target	1.25549	-3.62536
hsa-miR-494-3p	CPT1A	target	1.25549	-30.0023
hsa-miR-494-3p	CYB5A	target	1.25549	-3.68445
hsa-miR-494-3p	CYSTM1	target	1.25549	-26.8038
hsa-miR-494-3p	DCN	target	1.25549	-18.6157
hsa-miR-494-3p	DPYD	target	1.25549	-2.95261
hsa-miR-494-3p	DSG2	target	1.25549	-26.8768
hsa-miR-494-3p	ENPEP	target	1.25549	-16.2154
hsa-miR-494-3p	ENPP1	target	1.25549	-2.07576
hsa-miR-494-3p	EVI2B	target	1.25549	-5.53352
hsa-miR-494-3p	FAM114A1	target	1.25549	-4.83781
hsa-miR-494-3p	FGFR2	target	1.25549	-7.10842
hsa-miR-494-3p	FGL2	target	1.25549	-23.5663
hsa-miR-494-3p	FMO5	target	1.25549	-11.1138
hsa-miR-494-3p	GALNT7	target	1.25549	-6.95137
hsa-miR-494-3p	GK	target	1.25549	-4.43773
hsa-miR-494-3p	HADH	target	1.25549	-38.6191
hsa-miR-494-3p	HEPACAM2	target	1.25549	-22.3454
hsa-miR-494-3p	IL6ST	target	1.25549	-5.59606
hsa-miR-494-3p	LGR4	target	1.25549	-14.3337
hsa-miR-494-3p	LRRC19	target	1.25549	-32.8283
hsa-miR-494-3p	LRRFIP2	target	1.25549	-3.64622
hsa-miR-494-3p	LYSMD3	target	1.25549	-2.15027
hsa-miR-494-3p	MTUS1	target	1.25549	-4.00082
hsa-miR-494-3p	MUT	target	1.25549	-7.84317
hsa-miR-494-3p	MXD1	target	1.25549	-29.4651
hsa-miR-494-3p	NADK	target	1.25549	-3.83902
hsa-miR-494-3p	NEDD4L	target	1.25549	-5.01125
hsa-miR-494-3p	NNT	target	1.25549	-3.58416
hsa-miR-494-3p	NUDT9	target	1.25549	-2.6393
hsa-miR-494-3p	OTUD1	target	1.25549	-3.51049
hsa-miR-494-3p	PLS1	target	1.25549	-67.2456
hsa-miR-494-3p	PLSCR4	target	1.25549	-5.34881
hsa-miR-494-3p	PPM1A	target	1.25549	-4.50694
hsa-miR-494-3p	PPP1CB	target	1.25549	-15.9374
hsa-miR-494-3p	PPP1R12B	target	1.25549	-8.05282
hsa-miR-494-3p	PPP2R3A	target	1.25549	-2.41355
hsa-miR-494-3p	PSEN1	target	1.25549	-6.93216
hsa-miR-494-3p	PTEN	target	1.25549	-3.14548
hsa-miR-494-3p	RAB27A	target	1.25549	-7.30232
hsa-miR-494-3p	RNF103	target	1.25549	-4.2325
hsa-miR-494-3p	RNF138	target	1.25549	-4.50104
hsa-miR-494-3p	SAR1B	target	1.25549	-3.24762
hsa-miR-494-3p	SCARB2	target	1.25549	-18.0733
hsa-miR-494-3p	SFXN1	target	1.25549	-4.78184
hsa-miR-494-3p	SGMS2	target	1.25549	-2.45184
hsa-miR-494-3p	SHISA3	target	1.25549	-2.5498
hsa-miR-494-3p	SHOC2	target	1.25549	-5.09677
hsa-miR-494-3p	SHROOM3	target	1.25549	-11.453
hsa-miR-494-3p	SLC26A3	target	1.25549	-1212.02
hsa-miR-494-3p	SLC30A4	target	1.25549	-2.82361
hsa-miR-494-3p	SLC46A3	target	1.25549	-16.0824
hsa-miR-494-3p	SNX9	target	1.25549	-7.05182
hsa-miR-494-3p	SOCS6	target	1.25549	-6.24969
hsa-miR-494-3p	TAOK3	target	1.25549	-2.57799
hsa-miR-494-3p	TCF7L2	target	1.25549	-7.48079
hsa-miR-494-3p	TMEM164	target	1.25549	-8.0314
hsa-miR-494-3p	TNFSF10	target	1.25549	-30.0374
hsa-miR-494-3p	TOX4	target	1.25549	-2.21311
hsa-miR-494-3p	UBE2J1	target	1.25549	-9.92535
hsa-miR-494-3p	UGT2B17	target	1.25549	-322.234
hsa-miR-494-3p	WDR1	target	1.25549	-15.8909
hsa-miR-494-3p	ZDHHC3	target	1.25549	-4.30501
hsa-miR-584-5p	AFF1	target	1.10176	-3.72213
hsa-miR-584-5p	CYP2J2	target	1.10176	-14.9862
hsa-miR-584-5p	KIF13B	target	1.10176	-11.5862
hsa-miR-584-5p	MYO5B	target	1.10176	-9.89886
hsa-miR-584-5p	NCOR1	target	1.10176	-4.20536
hsa-miR-584-5p	NET1	target	1.10176	-17.8909
hsa-miR-584-5p	PELI2	target	1.10176	-2.72067
hsa-miR-584-5p	PPM1A	target	1.10176	-4.50694
hsa-miR-584-5p	PTP4A1	target	1.10176	-38.847
hsa-miR-584-5p	TOX4	target	1.10176	-2.21311
hsa-miR-584-5p	TTC22	target	1.10176	-13.3839
hsa-miR-584-5p	UBTD2	target	1.10176	-2.41188
hsa-miR-584-5p	ZDHHC3	target	1.10176	-4.30501
hsa-miR-3682-3p	AP1B1	target	1.05622	-8.36495
hsa-miR-3682-3p	ATP1A2	target	1.05622	-4.77111
hsa-miR-3682-3p	BCL2	target	1.05622	-2.41349
hsa-miR-3682-3p	DSG2	target	1.05622	-26.8768
hsa-miR-3682-3p	F13A1	target	1.05622	-12.1705
hsa-miR-3682-3p	FAM114A1	target	1.05622	-4.83781
hsa-miR-3682-3p	FBXO32	target	1.05622	-12.5688
hsa-miR-3682-3p	FNBP1	target	1.05622	-8.81994
hsa-miR-3682-3p	FRYL	target	1.05622	-3.28662
hsa-miR-3682-3p	KCNMA1	target	1.05622	-2.89022
hsa-miR-3682-3p	KIAA1211	target	1.05622	-7.04907
hsa-miR-3682-3p	KLF3	target	1.05622	-14.3729
hsa-miR-3682-3p	LUZP1	target	1.05622	-3.9805
hsa-miR-3682-3p	NEDD4L	target	1.05622	-5.01125
hsa-miR-3682-3p	OPTN	target	1.05622	-15.0377
hsa-miR-3682-3p	PPM1A	target	1.05622	-4.50694
hsa-miR-3682-3p	PPP2R5A	target	1.05622	-5.80421
hsa-miR-3682-3p	RAP1A	target	1.05622	-9.40831
hsa-miR-3682-3p	SEMA6A	target	1.05622	-9.48155
hsa-miR-3682-3p	SLC35A3	target	1.05622	-8.14221
hsa-miR-3682-3p	SUCLG2	target	1.05622	-61.193
hsa-miR-200c-5p	ATP1A2	target	0.769643	-4.77111
hsa-miR-200c-5p	HECA	target	0.769643	-4.32925
hsa-miR-200c-5p	KITLG	target	0.769643	-2.88852
hsa-miR-200c-5p	MTTP	target	0.769643	-9.97339
hsa-miR-200c-5p	TGFA	target	0.769643	-4.43719
hsa-miR-200c-5p	THRB	target	0.769643	-2.99465
hsa-miR-3613-3p	A1CF	target	0.62629	-4.01451
hsa-miR-3613-3p	ABHD5	target	0.62629	-5.77719
hsa-miR-3613-3p	ABL1	target	0.62629	-6.34514
hsa-miR-3613-3p	ACACB	target	0.62629	-2.61547
hsa-miR-3613-3p	ACOX1	target	0.62629	-28.1698
hsa-miR-3613-3p	AFF1	target	0.62629	-3.72213
hsa-miR-3613-3p	AGAP1	target	0.62629	-2.19575
hsa-miR-3613-3p	AGPAT3	target	0.62629	-3.98008
hsa-miR-3613-3p	AKAP12	target	0.62629	-5.01646
hsa-miR-3613-3p	AMOTL1	target	0.62629	-2.09512
hsa-miR-3613-3p	ANKMY2	target	0.62629	-2.6817
hsa-miR-3613-3p	ANKS4B	target	0.62629	-9.03523
hsa-miR-3613-3p	ANTXR2	target	0.62629	-6.07008
hsa-miR-3613-3p	AP3S2	target	0.62629	-3.10003
hsa-miR-3613-3p	APOL6	target	0.62629	-4.23317
hsa-miR-3613-3p	ARF6	target	0.62629	-13.6666
hsa-miR-3613-3p	ARL4A	target	0.62629	-4.77186
hsa-miR-3613-3p	ASAP2	target	0.62629	-2.7833
hsa-miR-3613-3p	ATP1B3	target	0.62629	-51.4405
hsa-miR-3613-3p	ATP2B1	target	0.62629	-5.87488
hsa-miR-3613-3p	B4GALT1	target	0.62629	-10.3604
hsa-miR-3613-3p	BARX2	target	0.62629	-5.34063
hsa-miR-3613-3p	BCL10	target	0.62629	-11.2896
hsa-miR-3613-3p	BCL2L11	target	0.62629	-3.50082
hsa-miR-3613-3p	BCL2L15	target	0.62629	-12.7917
hsa-miR-3613-3p	BDH2	target	0.62629	-4.16439
hsa-miR-3613-3p	BHLHE41	target	0.62629	-5.0418
hsa-miR-3613-3p	C1orf21	target	0.62629	-4.5441
hsa-miR-3613-3p	C9orf40	target	0.62629	-2.35994
hsa-miR-3613-3p	CAB39	target	0.62629	-16.324
hsa-miR-3613-3p	CALCOCO2	target	0.62629	-9.88007
hsa-miR-3613-3p	CALM1	target	0.62629	-41.4416
hsa-miR-3613-3p	CAPZB	target	0.62629	-20.7512
hsa-miR-3613-3p	CASP10	target	0.62629	-4.5523
hsa-miR-3613-3p	CASQ2	target	0.62629	-5.21718
hsa-miR-3613-3p	CAST	target	0.62629	-16.1624
hsa-miR-3613-3p	CCNDBP1	target	0.62629	-4.48975
hsa-miR-3613-3p	CD164	target	0.62629	-33.9385
hsa-miR-3613-3p	CD209	target	0.62629	-6.46045
hsa-miR-3613-3p	CD2AP	target	0.62629	-11.6433
hsa-miR-3613-3p	CDC42	target	0.62629	-25.3309
hsa-miR-3613-3p	CDC42BPA	target	0.62629	-2.12374
hsa-miR-3613-3p	CDC42SE2	target	0.62629	-12.5837
hsa-miR-3613-3p	CFL2	target	0.62629	-3.25293
hsa-miR-3613-3p	CHMP1B	target	0.62629	-20.9969
hsa-miR-3613-3p	CHP1	target	0.62629	-77.1987
hsa-miR-3613-3p	CITED2	target	0.62629	-23.5496
hsa-miR-3613-3p	CKB	target	0.62629	-339.898
hsa-miR-3613-3p	CLCA1	target	0.62629	-503.743
hsa-miR-3613-3p	CLMN	target	0.62629	-4.79374
hsa-miR-3613-3p	CMBL	target	0.62629	-62.6935
hsa-miR-3613-3p	COQ10B	target	0.62629	-2.94649
hsa-miR-3613-3p	CORO2A	target	0.62629	-13.8047
hsa-miR-3613-3p	CPM	target	0.62629	-8.32056
hsa-miR-3613-3p	CPT1A	target	0.62629	-30.0023
hsa-miR-3613-3p	CROT	target	0.62629	-4.73624
hsa-miR-3613-3p	CSNK1G3	target	0.62629	-2.98749
hsa-miR-3613-3p	CTNND1	target	0.62629	-29.1109
hsa-miR-3613-3p	CYB561D1	target	0.62629	-2.12259
hsa-miR-3613-3p	DOCK1	target	0.62629	-2.80177
hsa-miR-3613-3p	DOK4	target	0.62629	-15.2132
hsa-miR-3613-3p	DPYD	target	0.62629	-2.95261
hsa-miR-3613-3p	DSG2	target	0.62629	-26.8768
hsa-miR-3613-3p	DST	target	0.62629	-2.54531
hsa-miR-3613-3p	DUSP1	target	0.62629	-45.9076
hsa-miR-3613-3p	DUSP5	target	0.62629	-14.5518
hsa-miR-3613-3p	DYRK2	target	0.62629	-8.03675
hsa-miR-3613-3p	ECE1	target	0.62629	-19.5182
hsa-miR-3613-3p	EDNRB	target	0.62629	-2.66422
hsa-miR-3613-3p	EGLN1	target	0.62629	-6.38133
hsa-miR-3613-3p	EIF2AK3	target	0.62629	-2.55678
hsa-miR-3613-3p	EIF4E3	target	0.62629	-5.15189
hsa-miR-3613-3p	ELMSAN1	target	0.62629	-3.66702
hsa-miR-3613-3p	ENPP1	target	0.62629	-2.07576
hsa-miR-3613-3p	EPB41L4B	target	0.62629	-20.3335
hsa-miR-3613-3p	EPS8	target	0.62629	-8.97394
hsa-miR-3613-3p	ETNK1	target	0.62629	-11.2319
hsa-miR-3613-3p	EYA2	target	0.62629	-7.13386
hsa-miR-3613-3p	EZR	target	0.62629	-90.314
hsa-miR-3613-3p	FAM107B	target	0.62629	-10.6305
hsa-miR-3613-3p	FAM114A1	target	0.62629	-4.83781
hsa-miR-3613-3p	FBXO32	target	0.62629	-12.5688
hsa-miR-3613-3p	FECH	target	0.62629	-2.20707
hsa-miR-3613-3p	FEM1C	target	0.62629	-5.66562
hsa-miR-3613-3p	FGFR2	target	0.62629	-7.10842
hsa-miR-3613-3p	FOSB	target	0.62629	-11.1651
hsa-miR-3613-3p	FOXF1	target	0.62629	-5.12061
hsa-miR-3613-3p	FOXN3	target	0.62629	-4.89407
hsa-miR-3613-3p	FOXO1	target	0.62629	-4.11314
hsa-miR-3613-3p	FRYL	target	0.62629	-3.28662
hsa-miR-3613-3p	FZD5	target	0.62629	-12.4783
hsa-miR-3613-3p	GAB1	target	0.62629	-2.35605
hsa-miR-3613-3p	GBP3	target	0.62629	-24.3052
hsa-miR-3613-3p	GDA	target	0.62629	-3.582
hsa-miR-3613-3p	GHITM	target	0.62629	-69.5264
hsa-miR-3613-3p	GIPC2	target	0.62629	-7.42098
hsa-miR-3613-3p	GLIPR2	target	0.62629	-11.2255
hsa-miR-3613-3p	GLTP	target	0.62629	-24.9463
hsa-miR-3613-3p	GNA13	target	0.62629	-14.4667
hsa-miR-3613-3p	GNAQ	target	0.62629	-8.11418
hsa-miR-3613-3p	GNG7	target	0.62629	-2.78886
hsa-miR-3613-3p	GOLPH3L	target	0.62629	-6.60608
hsa-miR-3613-3p	GPBP1L1	target	0.62629	-9.25356
hsa-miR-3613-3p	GUCD1	target	0.62629	-12.8807
hsa-miR-3613-3p	HADH	target	0.62629	-38.6191
hsa-miR-3613-3p	HIGD1A	target	0.62629	-59.43
hsa-miR-3613-3p	HNF4G	target	0.62629	-10.7652
hsa-miR-3613-3p	HPGD	target	0.62629	-36.573
hsa-miR-3613-3p	IDH3A	target	0.62629	-4.04123
hsa-miR-3613-3p	IFNLR1	target	0.62629	-2.0801
hsa-miR-3613-3p	IL6R	target	0.62629	-11.1326
hsa-miR-3613-3p	IMPA1	target	0.62629	-6.31765
hsa-miR-3613-3p	INSR	target	0.62629	-3.97953
hsa-miR-3613-3p	IQGAP2	target	0.62629	-12.7208
hsa-miR-3613-3p	IRF4	target	0.62629	-4.96232
hsa-miR-3613-3p	ITM2A	target	0.62629	-7.68799
hsa-miR-3613-3p	KCNK5	target	0.62629	-15.9288
hsa-miR-3613-3p	KCNMA1	target	0.62629	-2.89022
hsa-miR-3613-3p	KCTD12	target	0.62629	-7.98073
hsa-miR-3613-3p	KIAA0232	target	0.62629	-2.4763
hsa-miR-3613-3p	KIAA1211	target	0.62629	-7.04907
hsa-miR-3613-3p	KIAA1671	target	0.62629	-4.62123
hsa-miR-3613-3p	KIAA2013	target	0.62629	-10.4207
hsa-miR-3613-3p	KIF16B	target	0.62629	-3.43437
hsa-miR-3613-3p	KIF1C	target	0.62629	-20.8762
hsa-miR-3613-3p	KIT	target	0.62629	-2.34406
hsa-miR-3613-3p	KLF10	target	0.62629	-9.42297
hsa-miR-3613-3p	KLF3	target	0.62629	-14.3729
hsa-miR-3613-3p	KLF6	target	0.62629	-25.2585
hsa-miR-3613-3p	KLF9	target	0.62629	-10.0375
hsa-miR-3613-3p	KRCC1	target	0.62629	-13.6088
hsa-miR-3613-3p	KRT8	target	0.62629	-349.71
hsa-miR-3613-3p	KTN1	target	0.62629	-5.95477
hsa-miR-3613-3p	LETM1	target	0.62629	-8.9451
hsa-miR-3613-3p	LGALSL	target	0.62629	-4.08031
hsa-miR-3613-3p	LMTK2	target	0.62629	-4.44894
hsa-miR-3613-3p	LPCAT4	target	0.62629	-9.07913
hsa-miR-3613-3p	LRRC1	target	0.62629	-9.26507
hsa-miR-3613-3p	LRRC19	target	0.62629	-32.8283
hsa-miR-3613-3p	LRRFIP2	target	0.62629	-3.64622
hsa-miR-3613-3p	LUZP1	target	0.62629	-3.9805
hsa-miR-3613-3p	LYSMD3	target	0.62629	-2.15027
hsa-miR-3613-3p	MAF	target	0.62629	-10.8416
hsa-miR-3613-3p	MALL	target	0.62629	-16.5189
hsa-miR-3613-3p	MAN1A1	target	0.62629	-20.8878
hsa-miR-3613-3p	MARCKS	target	0.62629	-51.1271
hsa-miR-3613-3p	MARK2	target	0.62629	-7.07416
hsa-miR-3613-3p	MAST3	target	0.62629	-3.44295
hsa-miR-3613-3p	MBNL1	target	0.62629	-6.39394
hsa-miR-3613-3p	MBOAT1	target	0.62629	-8.61293
hsa-miR-3613-3p	ME2	target	0.62629	-4.76975
hsa-miR-3613-3p	METRNL	target	0.62629	-14.6957
hsa-miR-3613-3p	METTL7A	target	0.62629	-42.7438
hsa-miR-3613-3p	MGAT3	target	0.62629	-2.24211
hsa-miR-3613-3p	MGAT4A	target	0.62629	-10.6336
hsa-miR-3613-3p	MIDN	target	0.62629	-14.1051
hsa-miR-3613-3p	MIER1	target	0.62629	-5.69857
hsa-miR-3613-3p	MIER3	target	0.62629	-17.3342
hsa-miR-3613-3p	MKRN1	target	0.62629	-10.2172
hsa-miR-3613-3p	MOB3A	target	0.62629	-5.92233
hsa-miR-3613-3p	MPP7	target	0.62629	-3.34495
hsa-miR-3613-3p	MT1G	target	0.62629	-462.006
hsa-miR-3613-3p	MXI1	target	0.62629	-16.8823
hsa-miR-3613-3p	MYO1C	target	0.62629	-20.6204
hsa-miR-3613-3p	NACC2	target	0.62629	-2.21953
hsa-miR-3613-3p	NADK	target	0.62629	-3.83902
hsa-miR-3613-3p	NEDD4L	target	0.62629	-5.01125
hsa-miR-3613-3p	NEDD9	target	0.62629	-7.82524
hsa-miR-3613-3p	NHSL1	target	0.62629	-7.96659
hsa-miR-3613-3p	NMNAT1	target	0.62629	-2.24036
hsa-miR-3613-3p	NR3C2	target	0.62629	-18.4824
hsa-miR-3613-3p	NR4A3	target	0.62629	-2.38677
hsa-miR-3613-3p	NRARP	target	0.62629	-18.354
hsa-miR-3613-3p	NRIP1	target	0.62629	-3.6213
hsa-miR-3613-3p	NTS	target	0.62629	-27.5072
hsa-miR-3613-3p	OAT	target	0.62629	-54.7865
hsa-miR-3613-3p	OLFML2A	target	0.62629	-2.44445
hsa-miR-3613-3p	OTUD1	target	0.62629	-3.51049
hsa-miR-3613-3p	PAQR5	target	0.62629	-9.54494
hsa-miR-3613-3p	PARM1	target	0.62629	-57.56
hsa-miR-3613-3p	PBX1	target	0.62629	-2.43232
hsa-miR-3613-3p	PDCD4	target	0.62629	-57.9334
hsa-miR-3613-3p	PDCD6IP	target	0.62629	-16.2838
hsa-miR-3613-3p	PDE3A	target	0.62629	-5.52763
hsa-miR-3613-3p	PDE5A	target	0.62629	-4.52824
hsa-miR-3613-3p	PDGFD	target	0.62629	-2.0291
hsa-miR-3613-3p	PDK4	target	0.62629	-27.0052
hsa-miR-3613-3p	PDLIM3	target	0.62629	-3.40139
hsa-miR-3613-3p	PGPEP1	target	0.62629	-3.53716
hsa-miR-3613-3p	PHLPP2	target	0.62629	-8.37791
hsa-miR-3613-3p	PIGR	target	0.62629	-1748.26
hsa-miR-3613-3p	PLAC8	target	0.62629	-98.2344
hsa-miR-3613-3p	PLEKHF2	target	0.62629	-4.19004
hsa-miR-3613-3p	PLOD2	target	0.62629	-7.78721
hsa-miR-3613-3p	PLS1	target	0.62629	-67.2456
hsa-miR-3613-3p	PLXNA2	target	0.62629	-5.782
hsa-miR-3613-3p	POU2AF1	target	0.62629	-2.97126
hsa-miR-3613-3p	PPARGC1A	target	0.62629	-2.92931
hsa-miR-3613-3p	PPM1A	target	0.62629	-4.50694
hsa-miR-3613-3p	PPP1CB	target	0.62629	-15.9374
hsa-miR-3613-3p	PPP2R5A	target	0.62629	-5.80421
hsa-miR-3613-3p	PRELID2	target	0.62629	-2.50183
hsa-miR-3613-3p	PRKAR2B	target	0.62629	-3.25564
hsa-miR-3613-3p	PROM2	target	0.62629	-5.93256
hsa-miR-3613-3p	PRR13	target	0.62629	-28.2616
hsa-miR-3613-3p	PRRG4	target	0.62629	-2.34876
hsa-miR-3613-3p	PTGER4	target	0.62629	-11.1612
hsa-miR-3613-3p	PTN	target	0.62629	-5.7155
hsa-miR-3613-3p	PTP4A1	target	0.62629	-38.847
hsa-miR-3613-3p	PTPRJ	target	0.62629	-4.05188
hsa-miR-3613-3p	RAB14	target	0.62629	-7.8136
hsa-miR-3613-3p	RALB	target	0.62629	-9.67292
hsa-miR-3613-3p	RAP1A	target	0.62629	-9.40831
hsa-miR-3613-3p	RASSF2	target	0.62629	-2.20491
hsa-miR-3613-3p	RBM47	target	0.62629	-25.3205
hsa-miR-3613-3p	RELL1	target	0.62629	-4.9694
hsa-miR-3613-3p	RERE	target	0.62629	-4.35378
hsa-miR-3613-3p	RIOK3	target	0.62629	-26.7668
hsa-miR-3613-3p	RMND5A	target	0.62629	-6.94619
hsa-miR-3613-3p	RNF103	target	0.62629	-4.2325
hsa-miR-3613-3p	RNF125	target	0.62629	-2.14325
hsa-miR-3613-3p	RSAD2	target	0.62629	-4.46143
hsa-miR-3613-3p	SAP30L	target	0.62629	-3.74955
hsa-miR-3613-3p	SAR1B	target	0.62629	-3.24762
hsa-miR-3613-3p	SATB2	target	0.62629	-7.82493
hsa-miR-3613-3p	SEC23A	target	0.62629	-5.25939
hsa-miR-3613-3p	SECISBP2L	target	0.62629	-2.75704
hsa-miR-3613-3p	SEL1L	target	0.62629	-6.35154
hsa-miR-3613-3p	SFXN1	target	0.62629	-4.78184
hsa-miR-3613-3p	SGCB	target	0.62629	-3.26573
hsa-miR-3613-3p	SGCE	target	0.62629	-2.96521
hsa-miR-3613-3p	SGK1	target	0.62629	-21.5115
hsa-miR-3613-3p	SGMS2	target	0.62629	-2.45184
hsa-miR-3613-3p	SGPP1	target	0.62629	-4.34447
hsa-miR-3613-3p	SH3BGRL2	target	0.62629	-25.9404
hsa-miR-3613-3p	SH3KBP1	target	0.62629	-9.54843
hsa-miR-3613-3p	SIPA1L2	target	0.62629	-5.3399
hsa-miR-3613-3p	SLC15A1	target	0.62629	-15.7924
hsa-miR-3613-3p	SLC25A34	target	0.62629	-6.2973
hsa-miR-3613-3p	SLC26A2	target	0.62629	-222.734
hsa-miR-3613-3p	SLC2A13	target	0.62629	-3.17363
hsa-miR-3613-3p	SLC2A4	target	0.62629	-2.26851
hsa-miR-3613-3p	SLC35D1	target	0.62629	-13.3551
hsa-miR-3613-3p	SLC35G1	target	0.62629	-2.78655
hsa-miR-3613-3p	SLC41A2	target	0.62629	-7.92237
hsa-miR-3613-3p	SLC4A4	target	0.62629	-36.2809
hsa-miR-3613-3p	SLC9A2	target	0.62629	-11.0798
hsa-miR-3613-3p	SMAD7	target	0.62629	-6.9965
hsa-miR-3613-3p	SNAP23	target	0.62629	-2.97908
hsa-miR-3613-3p	SNAP29	target	0.62629	-2.80409
hsa-miR-3613-3p	SNX1	target	0.62629	-2.61413
hsa-miR-3613-3p	SNX30	target	0.62629	-2.00691
hsa-miR-3613-3p	SNX4	target	0.62629	-4.74753
hsa-miR-3613-3p	SOCS6	target	0.62629	-6.24969
hsa-miR-3613-3p	SOWAHA	target	0.62629	-12.5556
hsa-miR-3613-3p	SPATS2L	target	0.62629	-5.6292
hsa-miR-3613-3p	SPECC1	target	0.62629	-2.58747
hsa-miR-3613-3p	SRSF5	target	0.62629	-10.3958
hsa-miR-3613-3p	STIM1	target	0.62629	-6.81908
hsa-miR-3613-3p	SVIL	target	0.62629	-11.3391
hsa-miR-3613-3p	SYNJ2BP	target	0.62629	-3.34539
hsa-miR-3613-3p	SYNPO2	target	0.62629	-20.8437
hsa-miR-3613-3p	TAOK3	target	0.62629	-2.57799
hsa-miR-3613-3p	TCF7L2	target	0.62629	-7.48079
hsa-miR-3613-3p	TEP1	target	0.62629	-3.25958
hsa-miR-3613-3p	TESK2	target	0.62629	-3.56879
hsa-miR-3613-3p	THRB	target	0.62629	-2.99465
hsa-miR-3613-3p	TLCD2	target	0.62629	-5.9811
hsa-miR-3613-3p	TM4SF20	target	0.62629	-13.6327
hsa-miR-3613-3p	TMBIM6	target	0.62629	-49.4761
hsa-miR-3613-3p	TMEM220	target	0.62629	-7.82109
hsa-miR-3613-3p	TMEM45B	target	0.62629	-61.5213
hsa-miR-3613-3p	TMEM56	target	0.62629	-6.89501
hsa-miR-3613-3p	TMEM63B	target	0.62629	-10.0929
hsa-miR-3613-3p	TMPRSS2	target	0.62629	-53.006
hsa-miR-3613-3p	TOX	target	0.62629	-2.66241
hsa-miR-3613-3p	TP53INP1	target	0.62629	-4.48731
hsa-miR-3613-3p	TPMT	target	0.62629	-11.7866
hsa-miR-3613-3p	TRIM36	target	0.62629	-2.43004
hsa-miR-3613-3p	TSPYL1	target	0.62629	-6.45399
hsa-miR-3613-3p	TXNIP	target	0.62629	-171.572
hsa-miR-3613-3p	UBE2G1	target	0.62629	-3.02861
hsa-miR-3613-3p	UBE2J1	target	0.62629	-9.92535
hsa-miR-3613-3p	UBL3	target	0.62629	-7.63583
hsa-miR-3613-3p	UGDH	target	0.62629	-36.6625
hsa-miR-3613-3p	VAPA	target	0.62629	-6.92736
hsa-miR-3613-3p	VASP	target	0.62629	-18.0198
hsa-miR-3613-3p	VSIG10	target	0.62629	-3.53882
hsa-miR-3613-3p	WASL	target	0.62629	-19.785
hsa-miR-3613-3p	WBP1L	target	0.62629	-6.70293
hsa-miR-3613-3p	XK	target	0.62629	-4.9431
hsa-miR-3613-3p	XYLT1	target	0.62629	-2.13256
hsa-miR-3613-3p	ZDHHC3	target	0.62629	-4.30501
hsa-miR-3613-3p	ZDHHC7	target	0.62629	-8.58724
hsa-miR-3613-3p	ZER1	target	0.62629	-19.5283
hsa-miR-3613-3p	ZFAND3	target	0.62629	-4.4936
hsa-miR-3613-3p	ZFP91	target	0.62629	-6.4459
hsa-miR-3613-3p	ZSWIM6	target	0.62629	-3.40966
hsa-miR-4488	AGAP3	target	-0.140683	4.84083
hsa-miR-4488	FOXP4	target	-0.140683	16.0461
hsa-miR-4488	PNPO	target	-0.140683	5.97327
hsa-miR-4488	SLC43A1	target	-0.140683	7.5838
hsa-miR-4488	SOX12	target	-0.140683	4.07465
hsa-miR-4488	STXBP1	target	-0.140683	4.58293
hsa-miR-4769-3p	ASPH	target	-0.152275	6.59078
hsa-miR-4769-3p	CSTF3	target	-0.152275	3.048
hsa-miR-4769-3p	FXR1	target	-0.152275	2.09557
hsa-miR-4769-3p	HDAC2	target	-0.152275	4.76761
hsa-miR-4769-3p	MCTS1	target	-0.152275	7.71003
hsa-miR-4769-3p	NUP98	target	-0.152275	3.31958
hsa-miR-4769-3p	PPM1H	target	-0.152275	6.26189
hsa-miR-4769-3p	PRIM1	target	-0.152275	3.16887
hsa-miR-4769-3p	PTCD3	target	-0.152275	4.62641
hsa-miR-4769-3p	SART3	target	-0.152275	3.51814
hsa-miR-4769-3p	SFPQ	target	-0.152275	17.1569
hsa-miR-4769-3p	SRD5A3	target	-0.152275	3.58936
hsa-miR-4769-3p	WDR3	target	-0.152275	3.1628
hsa-miR-4769-3p	WIPI2	target	-0.152275	3.11992
hsa-miR-3190-5p	AFMID	target	-0.412404	4.44243
hsa-miR-3190-5p	ARIH2	target	-0.412404	2.43924
hsa-miR-3190-5p	BAIAP2	target	-0.412404	2.39045
hsa-miR-3190-5p	CAPRIN1	target	-0.412404	13.6596
hsa-miR-3190-5p	CCNF	target	-0.412404	4.09411
hsa-miR-3190-5p	CMTR1	target	-0.412404	3.13643
hsa-miR-3190-5p	FAM83H	target	-0.412404	19.9702
hsa-miR-3190-5p	FBXO45	target	-0.412404	2.40448
hsa-miR-3190-5p	FXN	target	-0.412404	2.50648
hsa-miR-3190-5p	LARS2	target	-0.412404	2.7674
hsa-miR-3190-5p	MCTS1	target	-0.412404	7.71003
hsa-miR-3190-5p	RBM3	target	-0.412404	32.2567
hsa-miR-3190-5p	RRP7A	target	-0.412404	7.24584
hsa-miR-3190-5p	SLC48A1	target	-0.412404	2.02509
hsa-miR-3190-5p	SRSF2	target	-0.412404	21.7187
hsa-miR-3190-5p	SRSF6	target	-0.412404	17.7823
hsa-miR-3190-5p	SRSF7	target	-0.412404	15.2773
hsa-miR-3190-5p	STK4	target	-0.412404	3.18825
hsa-miR-3190-5p	TCERG1	target	-0.412404	3.5672
hsa-miR-3190-5p	TRMT2A	target	-0.412404	4.42122
hsa-miR-3190-5p	TRMT61A	target	-0.412404	7.48074
hsa-miR-3190-5p	ZNF579	target	-0.412404	2.65355
hsa-miR-3190-5p	ZNF587	target	-0.412404	2.49067
hsa-miR-636	BTF3L4	target	-0.426199	2.42602
hsa-miR-636	CD47	target	-0.426199	7.18635
hsa-miR-636	CETN2	target	-0.426199	13.6651
hsa-miR-636	COLGALT1	target	-0.426199	18.8004
hsa-miR-636	DESI1	target	-0.426199	6.46495
hsa-miR-636	FASTKD2	target	-0.426199	3.12142
hsa-miR-636	IL20RA	target	-0.426199	4.43579
hsa-miR-636	KDELR3	target	-0.426199	14.0001
hsa-miR-636	NFYA	target	-0.426199	3.32721
hsa-miR-636	RAB22A	target	-0.426199	3.39955
hsa-miR-636	RPL36A	target	-0.426199	15.6436
hsa-miR-636	ZDHHC8	target	-0.426199	4.13109
hsa-miR-4646-3p	CDK10	target	-0.529637	5.84457
hsa-miR-4646-3p	CPXM1	target	-0.529637	5.72374
hsa-miR-4646-3p	ERF	target	-0.529637	7.31751
hsa-miR-4646-3p	FADS1	target	-0.529637	2.2066
hsa-miR-4646-3p	IFFO2	target	-0.529637	2.04786
hsa-miR-4646-3p	PCBP2	target	-0.529637	8.08093
hsa-miR-4646-3p	PTCD3	target	-0.529637	4.62641
hsa-miR-4646-3p	SLC35A2	target	-0.529637	7.90787
hsa-miR-4646-3p	SNRPC	target	-0.529637	30.9163
hsa-miR-4646-3p	SRSF7	target	-0.529637	15.2773
hsa-miR-4646-3p	STAU1	target	-0.529637	21.6232
hsa-miR-4646-3p	TAF12	target	-0.529637	2.65857
hsa-miR-18b-3p	CAPRIN1	target	-0.530956	13.6596
hsa-miR-18b-3p	CD44	target	-0.530956	25.0884
hsa-miR-18b-3p	NEK2	target	-0.530956	6.62724
hsa-miR-18b-3p	NMD3	target	-0.530956	6.21281
hsa-miR-18b-3p	NOC3L	target	-0.530956	3.65178
hsa-miR-18b-3p	NUP98	target	-0.530956	3.31958
hsa-miR-18b-3p	PEX3	target	-0.530956	2.13213
hsa-miR-18b-3p	SLC12A2	target	-0.530956	35.5172
hsa-miR-18b-3p	SLC7A1	target	-0.530956	13.384
hsa-miR-4640-3p	CARHSP1	target	-0.681228	3.92029
hsa-miR-4640-3p	ERF	target	-0.681228	7.31751
hsa-miR-4640-3p	HNRNPU	target	-0.681228	17.7274
hsa-miR-4640-3p	LARP4	target	-0.681228	3.30217
hsa-miR-4640-3p	NOM1	target	-0.681228	2.49651
hsa-miR-4640-3p	PHF19	target	-0.681228	4.95279
hsa-miR-4640-3p	PSMD8	target	-0.681228	16.5187
hsa-miR-4640-3p	SHROOM4	target	-0.681228	2.37229
hsa-miR-4640-3p	SIM2	target	-0.681228	2.14846
hsa-miR-4640-3p	STC1	target	-0.681228	3.38771
hsa-miR-4640-3p	STC2	target	-0.681228	5.07629
hsa-miR-4640-3p	UBFD1	target	-0.681228	4.27315
hsa-miR-4640-3p	USP36	target	-0.681228	4.07365
hsa-miR-4640-3p	ZMYM3	target	-0.681228	2.42337
hsa-miR-345-5p	AIMP2	target	-0.960412	5.00185
hsa-miR-345-5p	E2F3	target	-0.960412	3.46421
hsa-miR-345-5p	GATAD1	target	-0.960412	4.45676
hsa-miR-345-5p	GMEB2	target	-0.960412	3.04901
hsa-miR-345-5p	MRS2	target	-0.960412	2.53138
hsa-miR-345-5p	NAP1L4	target	-0.960412	8.97788
hsa-miR-345-5p	SLBP	target	-0.960412	16.6283
hsa-miR-345-5p	SLC7A11	target	-0.960412	2.78206
hsa-miR-345-5p	SMS	target	-0.960412	23.5576
hsa-miR-345-5p	SRSF7	target	-0.960412	15.2773
hsa-miR-345-5p	TMEM33	target	-0.960412	3.97385
hsa-miR-345-5p	UMPS	target	-0.960412	2.71934
hsa-miR-345-5p	WDR43	target	-0.960412	12.6688
hsa-miR-345-5p	YEATS2	target	-0.960412	2.61569
hsa-miR-345-5p	ZSWIM1	target	-0.960412	4.10491
hsa-miR-3620-3p	ALG1	target	-1.15458	2.68069
hsa-miR-3620-3p	CAPRIN1	target	-1.15458	13.6596
hsa-miR-3620-3p	CD47	target	-1.15458	7.18635
hsa-miR-3620-3p	E2F3	target	-1.15458	3.46421
hsa-miR-3620-3p	EVA1A	target	-1.15458	3.54844
hsa-miR-3620-3p	IFFO2	target	-1.15458	2.04786
hsa-miR-3620-3p	NEK6	target	-1.15458	9.1662
hsa-miR-3620-3p	PSMD5	target	-1.15458	3.1414
hsa-miR-3620-3p	SRPK1	target	-1.15458	13.5273
hsa-miR-3620-3p	UMPS	target	-1.15458	2.71934
hsa-miR-3620-3p	WDR5	target	-1.15458	10.0087
hsa-miR-664a-3p	ACP1	target	-1.34347	11.8834
hsa-miR-664a-3p	AGFG1	target	-1.34347	2.64635
hsa-miR-664a-3p	AP3M2	target	-1.34347	2.22724
hsa-miR-664a-3p	ARMCX3	target	-1.34347	5.27725
hsa-miR-664a-3p	ASPH	target	-1.34347	6.59078
hsa-miR-664a-3p	C2CD4A	target	-1.34347	7.97583
hsa-miR-664a-3p	DBF4	target	-1.34347	3.39925
hsa-miR-664a-3p	DCUN1D5	target	-1.34347	12.7448
hsa-miR-664a-3p	DNAJB11	target	-1.34347	3.6282
hsa-miR-664a-3p	DRAM1	target	-1.34347	4.1757
hsa-miR-664a-3p	EIF2A	target	-1.34347	11.5499
hsa-miR-664a-3p	ELOVL5	target	-1.34347	11.5529
hsa-miR-664a-3p	ENAH	target	-1.34347	2.77558
hsa-miR-664a-3p	ENOPH1	target	-1.34347	17.4144
hsa-miR-664a-3p	FUBP3	target	-1.34347	2.75134
hsa-miR-664a-3p	GNPNAT1	target	-1.34347	7.57632
hsa-miR-664a-3p	GPATCH4	target	-1.34347	6.5421
hsa-miR-664a-3p	GSPT1	target	-1.34347	6.6917
hsa-miR-664a-3p	GTF3C4	target	-1.34347	2.07918
hsa-miR-664a-3p	HNRNPDL	target	-1.34347	11.6353
hsa-miR-664a-3p	IL17RB	target	-1.34347	4.80195
hsa-miR-664a-3p	IPO7	target	-1.34347	15.8565
hsa-miR-664a-3p	ITGA2	target	-1.34347	8.63145
hsa-miR-664a-3p	KIF11	target	-1.34347	5.35056
hsa-miR-664a-3p	LIF	target	-1.34347	7.63265
hsa-miR-664a-3p	LPCAT2	target	-1.34347	3.16724
hsa-miR-664a-3p	ME1	target	-1.34347	6.33477
hsa-miR-664a-3p	MEST	target	-1.34347	10.8206
hsa-miR-664a-3p	MTDH	target	-1.34347	11.3447
hsa-miR-664a-3p	MTFR1	target	-1.34347	4.68565
hsa-miR-664a-3p	NAA15	target	-1.34347	3.87586
hsa-miR-664a-3p	NBN	target	-1.34347	4.76747
hsa-miR-664a-3p	NCAPD2	target	-1.34347	9.28541
hsa-miR-664a-3p	NIP7	target	-1.34347	7.73693
hsa-miR-664a-3p	NOTCH3	target	-1.34347	7.24661
hsa-miR-664a-3p	NUDCD3	target	-1.34347	4.42883
hsa-miR-664a-3p	NUDT19	target	-1.34347	4.8549
hsa-miR-664a-3p	NUP43	target	-1.34347	5.96854
hsa-miR-664a-3p	OGT	target	-1.34347	11.9291
hsa-miR-664a-3p	ORMDL1	target	-1.34347	3.05923
hsa-miR-664a-3p	PATL1	target	-1.34347	6.90061
hsa-miR-664a-3p	PGM2	target	-1.34347	3.3562
hsa-miR-664a-3p	PGM3	target	-1.34347	2.76444
hsa-miR-664a-3p	PHKA1	target	-1.34347	2.15177
hsa-miR-664a-3p	PHLDA2	target	-1.34347	32.8616
hsa-miR-664a-3p	PLP2	target	-1.34347	102.56
hsa-miR-664a-3p	POC1B	target	-1.34347	3.04921
hsa-miR-664a-3p	POLR1B	target	-1.34347	4.7526
hsa-miR-664a-3p	PSMC2	target	-1.34347	12.6749
hsa-miR-664a-3p	PSMD5	target	-1.34347	3.1414
hsa-miR-664a-3p	QSOX2	target	-1.34347	5.4647
hsa-miR-664a-3p	RAD18	target	-1.34347	2.34041
hsa-miR-664a-3p	RAD51AP1	target	-1.34347	4.68227
hsa-miR-664a-3p	RBBP4	target	-1.34347	4.34294
hsa-miR-664a-3p	RBM26	target	-1.34347	3.7883
hsa-miR-664a-3p	RDH11	target	-1.34347	5.49243
hsa-miR-664a-3p	REPIN1	target	-1.34347	18.6787
hsa-miR-664a-3p	RFC3	target	-1.34347	11.0373
hsa-miR-664a-3p	RRM2	target	-1.34347	17.8302
hsa-miR-664a-3p	RSL1D1	target	-1.34347	20.4734
hsa-miR-664a-3p	SLC25A32	target	-1.34347	6.37618
hsa-miR-664a-3p	SLC35C2	target	-1.34347	5.92087
hsa-miR-664a-3p	SLC7A11	target	-1.34347	2.78206
hsa-miR-664a-3p	SMAD5	target	-1.34347	2.92637
hsa-miR-664a-3p	SNRPB2	target	-1.34347	13.9032
hsa-miR-664a-3p	SNTB1	target	-1.34347	8.89075
hsa-miR-664a-3p	SSR1	target	-1.34347	5.5263
hsa-miR-664a-3p	STAM	target	-1.34347	2.95493
hsa-miR-664a-3p	STRAP	target	-1.34347	30.3753
hsa-miR-664a-3p	TAF1D	target	-1.34347	7.10928
hsa-miR-664a-3p	TMEM62	target	-1.34347	2.68502
hsa-miR-664a-3p	TNFAIP1	target	-1.34347	4.37911
hsa-miR-664a-3p	TPR	target	-1.34347	3.2
hsa-miR-664a-3p	TRUB1	target	-1.34347	2.7277
hsa-miR-664a-3p	TSEN15	target	-1.34347	7.8958
hsa-miR-664a-3p	TWISTNB	target	-1.34347	4.60635
hsa-miR-664a-3p	UBA6	target	-1.34347	2.07067
hsa-miR-664a-3p	USP10	target	-1.34347	4.81944
hsa-miR-664a-3p	UTP23	target	-1.34347	2.31307
hsa-miR-664a-3p	ZNF74	target	-1.34347	2.16718
hsa-miR-1227-3p	MANEAL	target	-1.48874	4.57048
hsa-miR-1227-3p	NOM1	target	-1.48874	2.49651
hsa-miR-1227-3p	NUP62	target	-1.48874	6.47485
hsa-miR-1227-3p	PSMB2	target	-1.48874	12.1525
hsa-miR-1227-3p	RAD1	target	-1.48874	2.01846
hsa-miR-1227-3p	RBBP4	target	-1.48874	4.34294
hsa-miR-664b-3p	AASDHPPT	target	-1.6608	2.47416
hsa-miR-664b-3p	AGFG1	target	-1.6608	2.64635
hsa-miR-664b-3p	AJUBA	target	-1.6608	4.31527
hsa-miR-664b-3p	ALCAM	target	-1.6608	4.47581
hsa-miR-664b-3p	ANKRD10	target	-1.6608	13.0087
hsa-miR-664b-3p	ANKRD22	target	-1.6608	11.2537
hsa-miR-664b-3p	ASPH	target	-1.6608	6.59078
hsa-miR-664b-3p	ATP2C1	target	-1.6608	4.05104
hsa-miR-664b-3p	BID	target	-1.6608	7.81355
hsa-miR-664b-3p	C2CD4A	target	-1.6608	7.97583
hsa-miR-664b-3p	CD44	target	-1.6608	25.0884
hsa-miR-664b-3p	CXCL3	target	-1.6608	20.3044
hsa-miR-664b-3p	DPY19L1	target	-1.6608	5.29689
hsa-miR-664b-3p	DRAM1	target	-1.6608	4.1757
hsa-miR-664b-3p	DSN1	target	-1.6608	8.36724
hsa-miR-664b-3p	EIF3J	target	-1.6608	10.9827
hsa-miR-664b-3p	FAM122B	target	-1.6608	7.62362
hsa-miR-664b-3p	FAM217B	target	-1.6608	2.4245
hsa-miR-664b-3p	GGCT	target	-1.6608	23.9931
hsa-miR-664b-3p	GNPNAT1	target	-1.6608	7.57632
hsa-miR-664b-3p	GPATCH4	target	-1.6608	6.5421
hsa-miR-664b-3p	GRB10	target	-1.6608	2.40488
hsa-miR-664b-3p	GSPT1	target	-1.6608	6.6917
hsa-miR-664b-3p	HNRNPA3	target	-1.6608	18.2059
hsa-miR-664b-3p	HSD17B12	target	-1.6608	7.19517
hsa-miR-664b-3p	INSIG1	target	-1.6608	13.8967
hsa-miR-664b-3p	IPO9	target	-1.6608	3.35239
hsa-miR-664b-3p	KIAA1549	target	-1.6608	2.15207
hsa-miR-664b-3p	KIF11	target	-1.6608	5.35056
hsa-miR-664b-3p	KIF4A	target	-1.6608	5.34807
hsa-miR-664b-3p	LACTB2	target	-1.6608	9.94684
hsa-miR-664b-3p	LIF	target	-1.6608	7.63265
hsa-miR-664b-3p	LIMS1	target	-1.6608	3.24006
hsa-miR-664b-3p	LPCAT2	target	-1.6608	3.16724
hsa-miR-664b-3p	MCTS1	target	-1.6608	7.71003
hsa-miR-664b-3p	MET	target	-1.6608	19.7427
hsa-miR-664b-3p	MSANTD3	target	-1.6608	2.99023
hsa-miR-664b-3p	NBN	target	-1.6608	4.76747
hsa-miR-664b-3p	PCGF3	target	-1.6608	2.3442
hsa-miR-664b-3p	PDP1	target	-1.6608	3.88461
hsa-miR-664b-3p	PGM2	target	-1.6608	3.3562
hsa-miR-664b-3p	PGM3	target	-1.6608	2.76444
hsa-miR-664b-3p	PHB	target	-1.6608	22.3268
hsa-miR-664b-3p	PHKA1	target	-1.6608	2.15177
hsa-miR-664b-3p	PRPS1	target	-1.6608	10.2672
hsa-miR-664b-3p	RAB22A	target	-1.6608	3.39955
hsa-miR-664b-3p	RAD18	target	-1.6608	2.34041
hsa-miR-664b-3p	RBBP4	target	-1.6608	4.34294
hsa-miR-664b-3p	RBM17	target	-1.6608	3.72238
hsa-miR-664b-3p	SLC48A1	target	-1.6608	2.02509
hsa-miR-664b-3p	SLC7A11	target	-1.6608	2.78206
hsa-miR-664b-3p	SORD	target	-1.6608	6.4785
hsa-miR-664b-3p	SRP72	target	-1.6608	9.75381
hsa-miR-664b-3p	SSB	target	-1.6608	13.3765
hsa-miR-664b-3p	STAM	target	-1.6608	2.95493
hsa-miR-664b-3p	STT3A	target	-1.6608	9.70667
hsa-miR-664b-3p	SUPT7L	target	-1.6608	2.35187
hsa-miR-664b-3p	TIA1	target	-1.6608	5.37614
hsa-miR-664b-3p	TM4SF1	target	-1.6608	27.1172
hsa-miR-664b-3p	TMED4	target	-1.6608	9.91891
hsa-miR-664b-3p	TP53RK	target	-1.6608	7.91045
hsa-miR-664b-3p	TPR	target	-1.6608	3.2
hsa-miR-664b-3p	U2SURP	target	-1.6608	4.50236
hsa-miR-664b-3p	VMA21	target	-1.6608	7.13352
hsa-miR-664b-3p	ZMYM4	target	-1.6608	2.00207
hsa-miR-664b-3p	ZRANB2	target	-1.6608	4.90905
hsa-miR-338-5p	ACSL4	target	-1.73372	5.68111
hsa-miR-338-5p	AGFG1	target	-1.73372	2.64635
hsa-miR-338-5p	AIMP1	target	-1.73372	5.12803
hsa-miR-338-5p	AMMECR1	target	-1.73372	2.26893
hsa-miR-338-5p	AMOTL2	target	-1.73372	3.55519
hsa-miR-338-5p	ANKRD10	target	-1.73372	13.0087
hsa-miR-338-5p	ARL6IP6	target	-1.73372	2.80301
hsa-miR-338-5p	ARMCX3	target	-1.73372	5.27725
hsa-miR-338-5p	ARNTL2	target	-1.73372	3.54866
hsa-miR-338-5p	ASPH	target	-1.73372	6.59078
hsa-miR-338-5p	BCL9	target	-1.73372	2.24623
hsa-miR-338-5p	C1GALT1	target	-1.73372	2.6661
hsa-miR-338-5p	CBX3	target	-1.73372	35.185
hsa-miR-338-5p	CDCA8	target	-1.73372	12.0076
hsa-miR-338-5p	CPSF6	target	-1.73372	5.52525
hsa-miR-338-5p	CREBZF	target	-1.73372	6.50566
hsa-miR-338-5p	DCAF16	target	-1.73372	4.46614
hsa-miR-338-5p	DCUN1D5	target	-1.73372	12.7448
hsa-miR-338-5p	FAM122B	target	-1.73372	7.62362
hsa-miR-338-5p	FMNL2	target	-1.73372	4.36803
hsa-miR-338-5p	GOLT1B	target	-1.73372	6.03133
hsa-miR-338-5p	GRHL2	target	-1.73372	3.92676
hsa-miR-338-5p	GRPEL2	target	-1.73372	3.8549
hsa-miR-338-5p	GSPT1	target	-1.73372	6.6917
hsa-miR-338-5p	HDAC2	target	-1.73372	4.76761
hsa-miR-338-5p	HMGB3	target	-1.73372	8.45768
hsa-miR-338-5p	HPRT1	target	-1.73372	15.2156
hsa-miR-338-5p	LPCAT2	target	-1.73372	3.16724
hsa-miR-338-5p	LRRC58	target	-1.73372	3.02998
hsa-miR-338-5p	MACC1	target	-1.73372	5.69095
hsa-miR-338-5p	MAK16	target	-1.73372	2.6053
hsa-miR-338-5p	MCCC2	target	-1.73372	6.84028
hsa-miR-338-5p	MCM10	target	-1.73372	2.10118
hsa-miR-338-5p	MRI1	target	-1.73372	3.37158
hsa-miR-338-5p	MRPL30	target	-1.73372	5.92801
hsa-miR-338-5p	NAB1	target	-1.73372	5.31738
hsa-miR-338-5p	NDC1	target	-1.73372	5.76939
hsa-miR-338-5p	NEDD1	target	-1.73372	2.50777
hsa-miR-338-5p	OSER1	target	-1.73372	18.7629
hsa-miR-338-5p	PAN3	target	-1.73372	5.59121
hsa-miR-338-5p	PFDN4	target	-1.73372	9.64061
hsa-miR-338-5p	PHF14	target	-1.73372	3.08424
hsa-miR-338-5p	PHF20	target	-1.73372	3.7548
hsa-miR-338-5p	PPAT	target	-1.73372	3.9159
hsa-miR-338-5p	PRPF38B	target	-1.73372	5.67449
hsa-miR-338-5p	PRR11	target	-1.73372	4.53302
hsa-miR-338-5p	RAB22A	target	-1.73372	3.39955
hsa-miR-338-5p	RABGGTB	target	-1.73372	5.31152
hsa-miR-338-5p	RCN2	target	-1.73372	3.18167
hsa-miR-338-5p	RFC3	target	-1.73372	11.0373
hsa-miR-338-5p	RHEB	target	-1.73372	11.0813
hsa-miR-338-5p	RNF219	target	-1.73372	2.63562
hsa-miR-338-5p	RPIA	target	-1.73372	17.6262
hsa-miR-338-5p	SCML1	target	-1.73372	4.90941
hsa-miR-338-5p	SEPHS1	target	-1.73372	5.62188
hsa-miR-338-5p	SLC11A2	target	-1.73372	8.15303
hsa-miR-338-5p	SLC6A6	target	-1.73372	13.9298
hsa-miR-338-5p	SLC7A6	target	-1.73372	2.28393
hsa-miR-338-5p	SMAD5	target	-1.73372	2.92637
hsa-miR-338-5p	SNTB1	target	-1.73372	8.89075
hsa-miR-338-5p	SPDL1	target	-1.73372	2.12195
hsa-miR-338-5p	SRSF1	target	-1.73372	19.8162
hsa-miR-338-5p	SYPL1	target	-1.73372	18.9603
hsa-miR-338-5p	TAF2	target	-1.73372	2.37866
hsa-miR-338-5p	TAF4	target	-1.73372	2.12538
hsa-miR-338-5p	TARDBP	target	-1.73372	4.61575
hsa-miR-338-5p	TMEM158	target	-1.73372	5.64044
hsa-miR-338-5p	TMEM185B	target	-1.73372	8.28348
hsa-miR-338-5p	TMPO	target	-1.73372	8.11693
hsa-miR-338-5p	TRMT11	target	-1.73372	3.7366
hsa-miR-338-5p	TTK	target	-1.73372	3.38844
hsa-miR-338-5p	U2SURP	target	-1.73372	4.50236
hsa-miR-338-5p	UBA2	target	-1.73372	14.7732
hsa-miR-338-5p	UBE2H	target	-1.73372	6.00027
hsa-miR-338-5p	VMA21	target	-1.73372	7.13352
hsa-miR-338-5p	WDYHV1	target	-1.73372	3.73016
hsa-miR-338-5p	ZBTB33	target	-1.73372	3.6019
hsa-miR-338-5p	ZCRB1	target	-1.73372	5.60205
hsa-miR-338-5p	ZMYM4	target	-1.73372	2.00207
hsa-miR-338-5p	ZNF706	target	-1.73372	4.30404
hsa-miR-5010-3p	ACSL4	target	-1.84154	5.68111
hsa-miR-5010-3p	ADO	target	-1.84154	3.42709
hsa-miR-5010-3p	AIMP1	target	-1.84154	5.12803
hsa-miR-5010-3p	ARMC10	target	-1.84154	6.83865
hsa-miR-5010-3p	BAIAP2	target	-1.84154	2.39045
hsa-miR-5010-3p	CDCA7	target	-1.84154	31.9816
hsa-miR-5010-3p	CHERP	target	-1.84154	3.42345
hsa-miR-5010-3p	DLGAP4	target	-1.84154	7.18006
hsa-miR-5010-3p	ENC1	target	-1.84154	25.5297
hsa-miR-5010-3p	ENOPH1	target	-1.84154	17.4144
hsa-miR-5010-3p	ETS2	target	-1.84154	66.7049
hsa-miR-5010-3p	FAM111B	target	-1.84154	3.93859
hsa-miR-5010-3p	FAM49B	target	-1.84154	3.50941
hsa-miR-5010-3p	FAM89A	target	-1.84154	4.25001
hsa-miR-5010-3p	FMNL2	target	-1.84154	4.36803
hsa-miR-5010-3p	GTF3C3	target	-1.84154	2.69786
hsa-miR-5010-3p	HSBP1	target	-1.84154	4.53795
hsa-miR-5010-3p	KIAA1549	target	-1.84154	2.15207
hsa-miR-5010-3p	KIF20A	target	-1.84154	5.17806
hsa-miR-5010-3p	KPNA3	target	-1.84154	5.649
hsa-miR-5010-3p	KRIT1	target	-1.84154	2.08949
hsa-miR-5010-3p	LIPG	target	-1.84154	2.07702
hsa-miR-5010-3p	MEX3A	target	-1.84154	2.74327
hsa-miR-5010-3p	PABPC1	target	-1.84154	245.419
hsa-miR-5010-3p	PARPBP	target	-1.84154	2.45719
hsa-miR-5010-3p	PDCD2	target	-1.84154	5.43022
hsa-miR-5010-3p	PDCD6	target	-1.84154	4.33859
hsa-miR-5010-3p	PLAA	target	-1.84154	2.62188
hsa-miR-5010-3p	PODXL	target	-1.84154	8.25946
hsa-miR-5010-3p	PSMD12	target	-1.84154	4.69164
hsa-miR-5010-3p	RAB22A	target	-1.84154	3.39955
hsa-miR-5010-3p	RBBP4	target	-1.84154	4.34294
hsa-miR-5010-3p	RPE	target	-1.84154	4.92617
hsa-miR-5010-3p	SKA1	target	-1.84154	2.51651
hsa-miR-5010-3p	SLC7A11	target	-1.84154	2.78206
hsa-miR-5010-3p	SRPK1	target	-1.84154	13.5273
hsa-miR-5010-3p	SRSF3	target	-1.84154	13.8096
hsa-miR-5010-3p	STC1	target	-1.84154	3.38771
hsa-miR-5010-3p	TARDBP	target	-1.84154	4.61575
hsa-miR-5010-3p	TCF20	target	-1.84154	4.05897
hsa-miR-5010-3p	TFDP1	target	-1.84154	25.1058
hsa-miR-5010-3p	TMEM70	target	-1.84154	4.95063
hsa-miR-5010-3p	USP10	target	-1.84154	4.81944
hsa-miR-5010-3p	VSNL1	target	-1.84154	8.03892
hsa-miR-5010-3p	ZFR	target	-1.84154	3.29544
hsa-miR-5010-3p	ZNF146	target	-1.84154	10.9913
hsa-miR-3614-5p	AKAP17A	target	-1.92317	6.4537
hsa-miR-3614-5p	ASPH	target	-1.92317	6.59078
hsa-miR-3614-5p	AXIN2	target	-1.92317	28.1421
hsa-miR-3614-5p	BCL9	target	-1.92317	2.24623
hsa-miR-3614-5p	DBF4	target	-1.92317	3.39925
hsa-miR-3614-5p	IPO9	target	-1.92317	3.35239
hsa-miR-3614-5p	IRF2BP2	target	-1.92317	23.1853
hsa-miR-3614-5p	ITGA2	target	-1.92317	8.63145
hsa-miR-3614-5p	KIAA0930	target	-1.92317	2.63818
hsa-miR-3614-5p	MKI67	target	-1.92317	9.18264
hsa-miR-3614-5p	PNN	target	-1.92317	12.9177
hsa-miR-3614-5p	PPM1H	target	-1.92317	6.26189
hsa-miR-3614-5p	SET	target	-1.92317	45.7939
hsa-miR-483-3p	ABLIM2	target	-2.56383	2.40405
hsa-miR-483-3p	ASCC3	target	-2.56383	2.13436
hsa-miR-483-3p	C8orf33	target	-2.56383	20.2021
hsa-miR-483-3p	EI24	target	-2.56383	12.0559
hsa-miR-483-3p	HSBP1	target	-2.56383	4.53795
hsa-miR-483-3p	HSPA9	target	-2.56383	24.7725
hsa-miR-483-3p	KIAA1549	target	-2.56383	2.15207
hsa-miR-483-3p	MRPS27	target	-2.56383	5.24341
hsa-miR-483-3p	MTA2	target	-2.56383	7.73269
hsa-miR-483-3p	ODF2	target	-2.56383	4.48152
hsa-miR-483-3p	OGT	target	-2.56383	11.9291
hsa-miR-483-3p	PATZ1	target	-2.56383	4.8647
hsa-miR-483-3p	R3HDM1	target	-2.56383	2.95224
hsa-miR-483-3p	SEH1L	target	-2.56383	2.00469
hsa-miR-483-3p	STC2	target	-2.56383	5.07629
hsa-miR-483-3p	TUBGCP3	target	-2.56383	3.23319
hsa-miR-483-3p	XPO1	target	-2.56383	7.37935
hsa-miR-484	ANAPC7	target	-2.64533	5.9087
hsa-miR-484	APLN	target	-2.64533	3.02757
hsa-miR-484	CYB5B	target	-2.64533	12.5896
hsa-miR-484	KIAA1549	target	-2.64533	2.15207
hsa-miR-484	LRRC58	target	-2.64533	3.02998
hsa-miR-484	M6PR	target	-2.64533	5.82503
hsa-miR-484	MGAT5	target	-2.64533	12.3238
hsa-miR-484	PLEKHG4	target	-2.64533	5.30059
hsa-miR-484	SAMD4B	target	-2.64533	5.4938
hsa-miR-484	SNRNP200	target	-2.64533	9.59152
hsa-miR-484	SYT7	target	-2.64533	10.4801
hsa-miR-484	XPO4	target	-2.64533	3.22637
hsa-miR-3940-3p	ENGASE	target	-2.87615	11.055
hsa-miR-4728-3p	BTF3L4	target	-2.92337	2.42602
hsa-miR-4728-3p	DAP3	target	-2.92337	10.6471
hsa-miR-4728-3p	EXO1	target	-2.92337	2.7277
hsa-miR-4728-3p	FAM217B	target	-2.92337	2.4245
hsa-miR-4728-3p	HNRNPA3	target	-2.92337	18.2059
hsa-miR-4728-3p	RFT1	target	-2.92337	2.41391
hsa-miR-4728-3p	RGS16	target	-2.92337	7.27388
hsa-miR-4728-3p	SLC11A2	target	-2.92337	8.15303
hsa-miR-4728-3p	SSR1	target	-2.92337	5.5263
hsa-miR-4728-3p	TAF4	target	-2.92337	2.12538
hsa-miR-4728-3p	THEM6	target	-2.92337	16.8636
hsa-miR-4728-3p	ZNHIT6	target	-2.92337	2.07272
hsa-miR-99b-5p	SRSF3	target	-3.19149	13.8096
hsa-miR-671-3p	ADAMTS2	target	-3.56871	5.83826
hsa-miR-671-3p	GRB10	target	-3.56871	2.40488
hsa-miR-766-3p	ADPGK	target	-4.07038	3.42819
hsa-miR-766-3p	ASB6	target	-4.07038	2.0619
hsa-miR-766-3p	ASIC1	target	-4.07038	2.99397
hsa-miR-766-3p	CTSV	target	-4.07038	2.65651
hsa-miR-766-3p	FAM219A	target	-4.07038	2.56359
hsa-miR-766-3p	FOPNL	target	-4.07038	8.3169
hsa-miR-766-3p	FUS	target	-4.07038	12.9127
hsa-miR-766-3p	GPI	target	-4.07038	24.3404
hsa-miR-766-3p	HNRNPF	target	-4.07038	27.7097
hsa-miR-766-3p	MGAT5	target	-4.07038	12.3238
hsa-miR-766-3p	MRPS23	target	-4.07038	5.38282
hsa-miR-766-3p	NONO	target	-4.07038	47.5217
hsa-miR-766-3p	NUDT19	target	-4.07038	4.8549
hsa-miR-766-3p	NUP210	target	-4.07038	9.55306
hsa-miR-766-3p	PAN3	target	-4.07038	5.59121
hsa-miR-766-3p	PFKM	target	-4.07038	3.96512
hsa-miR-766-3p	PGM3	target	-4.07038	2.76444
hsa-miR-766-3p	PHC2	target	-4.07038	10.6404
hsa-miR-766-3p	PNP	target	-4.07038	8.40832
hsa-miR-766-3p	POLM	target	-4.07038	3.56738
hsa-miR-766-3p	PSRC1	target	-4.07038	3.64569
hsa-miR-766-3p	PVR	target	-4.07038	13.3505
hsa-miR-766-3p	RAB15	target	-4.07038	15.1307
hsa-miR-766-3p	RAD51	target	-4.07038	2.59933
hsa-miR-766-3p	RFT1	target	-4.07038	2.41391
hsa-miR-766-3p	RPL27A	target	-4.07038	48.8195
hsa-miR-766-3p	RRP7A	target	-4.07038	7.24584
hsa-miR-766-3p	SKP2	target	-4.07038	5.82253
hsa-miR-766-3p	SMARCD1	target	-4.07038	5.41474
hsa-miR-766-3p	SURF6	target	-4.07038	5.03197
hsa-miR-766-3p	TCF19	target	-4.07038	4.56503
hsa-miR-766-3p	TMEM33	target	-4.07038	3.97385
hsa-miR-766-3p	TMPRSS13	target	-4.07038	2.15173
hsa-miR-766-3p	VMA21	target	-4.07038	7.13352
*miRNA-mRNA pairs is defined as the miRNA down-regulation and mRNA up-regulation in same patients
