# Supplementary material for: Expression profile, molecular functions, and prognostic significance of miRNAs in primary colorectal cancer stem cells
Source: Aging (Albany NY). 2021 Apr 1;13(8):12067–85. doi: 10.18632/aging.202914 (PMC8109135; doi:10.18632/aging.202914)
Supplement: Supplementary Table 6 [file aging-13-202914-s007.xlsx]

## Sheet: Sheet1
Supplementary Table 6. The GO analysis of target genes of the pCSCSCs-related miRNAs.
ONTOLOGY	ID	GO_Name	Count	GeneRatio	PValue	Genes
BP	GO:0060463	lung lobe morphogenesis	4	0.460829	0.00318294	LIF, FGFR2, FOXF1, GRHL2
BP	GO:0034629	cellular protein complex localization	5	0.576037	0.000514	EZR, NACC2, SEH1L, SMAD7, WASL
BP	GO:0005513	detection of calcium ion	5	0.576037	0.00337893	STIM1, ASPH, CASQ2, KCNMB1, CALM1
BP	GO:0010881	regulation of cardiac muscle contraction by regulation of the release of sequestered calcium ion	6	0.691244	0.00155013	PLN, CAMK2D, ASPH, ATP1A2, CASQ2, CALM1
BP	GO:0016050	vesicle organization	7	0.806452	0.00167872	SNX9, SNX1, SORT1, SNX4, WASL, SNX30, CD2AP
BP	GO:0051017	actin filament bundle assembly	7	0.806452	0.00244156	CDC42, EZR, EPS8, BAIAP2, PLS1, NEDD9, LCP1
BP	GO:0006409	tRNA export from nucleus	7	0.806452	0.00343911	NDC1, NUP98, NUP62, SEH1L, NUP210, TPR, NUP43
BP	GO:0010827	regulation of glucose transport	7	0.806452	0.00403845	NDC1, NUP98, NUP62, SEH1L, NUP210, TPR, NUP43
BP	GO:0007080	mitotic metaphase plate congression	7	0.806452	0.00722579	CDCA8, CHMP1B, SEH1L, PSRC1, SPDL1, PDCD6IP, CHMP2B
BP	GO:0006605	protein targeting	7	0.806452	0.00936512	ZDHHC3, PAN3, MYO1C, AKAP12, SYNJ2BP, KIF13B, RAB27A
BP	GO:0006865	amino acid transport	8	0.921659	0.00107604	SLC38A4, SLC7A1, SLC6A6, XK, SLC6A19, SLC43A1, SLC7A6, SLC7A11
BP	GO:0007077	mitotic nuclear envelope disassembly	8	0.921659	0.00424499	NDC1, NUP98, NUP62, SEH1L, NUP210, TPR, NUP43, NEK6
BP	GO:0071560	cellular response to transforming growth factor beta stimulus	8	0.921659	0.0077668	LIMS1, HDAC2, SMAD7, PPM1A, PDE3A, PDGFD, ABL1, PPARGC1A
BP	GO:0006405	RNA export from nucleus	9	1.03687	0.00406159	SRSF3, SRSF1, SRSF2, SRSF5, NUP98, NUP62, SRSF7, SRSF6, TPR
BP	GO:0032922	circadian regulation of gene expression	9	1.03687	0.00507568	PPARA, HDAC2, OGT, BHLHE41, PPARGC1A, PPP1CB, LGR4, HNRNPU, NRIP1
BP	GO:0048661	positive regulation of smooth muscle cell proliferation	9	1.03687	0.00694612	NOTCH3, FGFR2, CAMK2D, SKP2, ITGA2, PDGFD, IL6R, NR4A3, PPARGC1A
BP	GO:0075733	intracellular transport of virus	10	1.15207	0.00057	NDC1, XPO1, NUP98, NUP62, SEH1L, CD209, NUP210, TPR, KPNA3, NUP43
BP	GO:1901796	regulation of signal transduction by p53 class mediator	14	1.6129	0.00577055	EXO1, TAF2, TAF4, NBN, RBBP4, MTA2, PHF20, TP53RK, RAD1, RFC3, HDAC2, TAF12, DYRK2, TP53INP1
BP	GO:0006406	mRNA export from nucleus	15	1.72811	0.000248	SRSF1, NUP98, AGFG1, SLBP, SRSF3, NDC1, SRSF2, SRSF5, SRSF7, NUP62, SEH1L, SRSF6, NUP210, TPR, NUP43
BP	GO:0050821	protein stabilization	15	1.72811	0.00501884	ATP1B3, SMAD7, PHB, STXBP1, NAA15, CHP1, STK4, PTEN, PPARGC1A, STX12, PEX19, GNAQ, A1CF, RASSF2, SEL1L
BP	GO:0043123	positive regulation of I-kappaB kinase/NF-kappaB signaling	17	1.95853	0.00399458	BCL10, MTDH, VAPA, GOLT1B, PPM1A, TRIM25, TAB2, AJUBA, CASP10, TNFSF10, TMED4, NUP62, ATP2C1, MIER1, PELI2, ABL1, NEK6
BP	GO:0006397	mRNA processing	18	2.07373	0.00486258	SRSF1, PAN3, MBNL1, PPARGC1A, SRPK1, NONO, SRSF2, SRSF5, AKAP17A, SRSF7, A1CF, TARDBP, SFPQ, ZRANB2, CPSF6, PRPF38B, TSEN15, RBM26
BP	GO:0000398	mRNA splicing, via spliceosome	22	2.53456	0.00196845	SRSF1, FUS, CSTF3, SNRPB2, DQX1, ZCRB1, SART3, HNRNPU, PNN, SRSF3, NONO, HNRNPA3, SRSF2, SRSF5, SRSF7, SRSF6, RAVER2, HNRNPF, PCBP2, SNRNP200, PABPC1, SNRPC
CC	GO:0019013	viral nucleocapsid	6	0.691244	0.00756041	HNRNPA3, HNRNPF, SNRPB2, SNRNP200, SNRPC, HNRNPDL
CC	GO:0000118	histone deacetylase complex	7	0.806452	0.00499478	SATB2, MTA2, SAP30L, NCOR1, RERE, NRIP1, ELMSAN1
CC	GO:0030315	T-tubule	7	0.806452	0.00656145	EZR, ATP2B4, SLC2A4, SLC30A1, ANK3, CAMK2D, ATP1A2
CC	GO:0031526	brush border membrane	8	0.921659	0.00750085	SLC11A2, GNA13, B4GALT1, SLC26A3, TRPM6, PEX19, SLC6A19, MTTP
CC	GO:0030175	filopodium	10	1.15207	0.00442479	B4GALT1, CDC42, ENAH, EZR, PODXL, BAIAP2, KITLG, IQGAP2, LCP1, VASP
CC	GO:0005643	nuclear pore	11	1.26728	0.00137732	NDC1, NUP98, NUP62, MYO1C, AGFG1, IPO7, TMEM33, XPO4, NUP210, TPR, KPNA3
CC	GO:0001726	ruffle	11	1.26728	0.0071379	SNX9, EZR, PODXL, BAIAP2, RAB22A, WASF2, ARF6, ABL1, PALLD, CD2AP, LCP1
CC	GO:0000776	kinetochore	12	1.38249	0.000977	XPO1, NUP98, KAT2B, PSEN1, SEH1L, NEK2, RASSF2, TTK, PAFAH1B1, TPR, WDR43, NUP43
CC	GO:0030018	Z disc	13	1.4977	0.00687823	ATP2B4, ANK3, PPP2R5A, CFL2, PPP1R12B, KRT8, PDLIM3, FBXO32, SYNPO2, PALLD, DST, CAPZB, CASQ2
CC	GO:0000922	spindle pole	15	1.72811	0.000378	KIF11, CDC14A, NEK2, DSN1, PSRC1, NEDD9, SPDL1, TUBGCP3, NEDD1, POC1B, NUP62, PPP2CB, ODF2, NEK6, CALM1
CC	GO:0043209	myelin sheath	15	1.72811	0.00874016	PHB, PITPNA, STXBP1, ARF6, ATP1A2, IDH3A, CKB, CDC42, GPI, EZR, BCL2, RAP1A, WDR1, PDCD6IP, HSPA9
CC	GO:0030529	intracellular ribonucleoprotein complex	16	1.84332	0.00120159	XPO1, SNRPB2, SSB, HNRNPDL, HNRNPU, SLBP, HNRNPA3, NUP62, HNRNPF, PCBP2, SNRNP200, TEP1, CPSF6, SECISBP2L, PABPC1, DYRK2
CC	GO:0005635	nuclear envelope	16	1.84332	0.00546378	XPO1, NUP98, CBX3, IPO9, NDC1, NUP62, SEH1L, TMEM33, NUP210, ANXA11, PAFAH1B1, TMPO, TPR, NUP43, AGPAT3, DST
CC	GO:0030027	lamellipodium	16	1.84332	0.00578619	ENAH, PODXL, WASF2, SNX1, CTNND1, NEDD9, IQGAP2, KITLG, CDH1, PALLD, AMOTL1, CAPZB, VASP, AJUBA, WASL, MYLK
CC	GO:0016323	basolateral plasma membrane	18	2.07373	0.00318637	CLDN8, B4GALT1, ENPP1, IL6R, SLC7A6, MTTP, CD1D, ATP2B1, PROM2, EZR, ATP2B4, CDH17, ANK3, P2RY1, ADRA2A, TGFA, SLC4A4, HPGD
CC	GO:0031410	cytoplasmic vesicle	21	2.41935	0.00483577	FGFR2, SNAP29, SNX9, AGFG1, MYO1C, CALCOCO2, ENPEP, OPTN, AMOTL1, AMOTL2, SLC11A2, FNBP1, PROM2, MALL, PSEN1, TGFA, SORT1, WASL, PDCD6, DST, TP53INP1
CC	GO:0016324	apical plasma membrane	25	2.88018	0.00323181	SHROOM3, MTDH, SHROOM4, ENPEP, AMOTL1, AMOTL2, PTEN, SLC11A2, ATP2B1, EZR, P2RY1, ITPK1, RAB27A, KCNMA1, TRPM6, PLD1, SLC12A2, ARHGEF18, PODXL, PFKM, IL6R, SLC26A3, PROM2, DSG2, STC1
CC	GO:0031965	nuclear membrane	26	2.99539	3.99e-05	XPO1, NUP98, MTDH, SEPHS1, VAPA, PHF20, NDC1, EDNRB, SLC30A1, NUP210, BCL2, PAFAH1B1, TPR, QSOX2, GTF3C3, MRPS23, EI24, PSEN1, GNAQ, NUP62, SORT1, WDR3, TMPO, ABL1, PDCD6, REPIN1
CC	GO:0005913	cell-cell adherens junction	26	2.99539	0.00608815	PVR, CAST, SNX9, VAPA, WASF2, CTNND1, SNX1, EIF2A, CDH1, CD2AP, CAPZB, CHMP2B, EZR, SORBS1, FMNL2, SMAD7, BAIAP2, KTN1, TRIM25, MPP7, VASP, MARK2, NOTCH3, RSL1D1, UBFD1, TMPO
CC	GO:0015629	actin cytoskeleton	29	3.34101	5.78e-07	ABLIM2, SHROOM4, PPP1R12B, WASF2, PDLIM3, IQGAP2, CDH1, CD2AP, CAPZB, TMEM63B, NDC1, CORO2A, TCERG1, EZR, ZNF74, BAIAP2, SYNPO2, PALLD, VASP, NOTCH3, CFL2, SVIL, PGM1, RAB22A, MARCKS, WASL, ABL1, DST, LCP1
CC	GO:0043234	protein complex	33	3.80184	0.00197319	LIMS1, NEK2, SNX1, SNX4, PEX3, CDCA8, SET, ATP2B4, PEX19, CAMK2D, SNTB1, USP10, CAB39, HIGD1A, MYO5B, BCL10, RBBP4, CNST, SMAD7, MTA2, SMAD5, STXBP1, STIM1, WIPI2, STK4, HDAC2, PSEN1, KRIT1, PLN, RASSF2, PDGFRA, SPATS2L, RBM17
CC	GO:0005925	focal adhesion	35	4.03226	0.000195	PVR, GNA13, LIMS1, ENAH, FHL1, AKAP12, NEDD9, ARF6, CDH1, ALCAM, CDC42, EZR, CD44, SORBS1, PCBP2, SNTB1, SCARB2, SNAP23, PABPC1, HSPA9, CAPN5, CHP1, ITGA2, SYNPO2, PALLD, PPP1CB, VASP, AJUBA, RRAS2, SVIL, SH3KBP1, MARCKS, PDCD6IP, DST, LCP1
CC	GO:0000139	Golgi membrane	46	5.29954	0.000415	SNAP29, AP1B1, VAPA, GALNT7, GNPNAT1, SLC35A2, SLC35A3, ARHGAP21, RNF125, GLIPR2, CDC42, MALL, STX12, XYLT1, TMEM59, GOLPH3L, TGFA, PDGFD, AGPAT3, C1GALT1, SEC23A, B4GALT1, KDELR3, MGAT4A, PLD1, PARM1, ZDHHC3, GOLT1B, B3GALT1, ZDHHC7, CHP1, MAN1A1, HEPACAM2, OPTN, FZD5, LPCAT2, NOTCH3, MGAT3, MANEAL, PSEN1, ATP2C1, RAB14, RHEB, MGAT5, GBP3, ATP8A1
CC	GO:0005730	nucleolus	56	6.45161	0.00513316	XPO1, ACOX1, ZBTB33, NBN, SURF6, RBM3, MXI1, MCM10, CD2AP, NONO, CDCA8, MAK16, ZNF146, SAP30L, TWISTNB, TSEN15, MRI1, NIP7, ZDHHC7, ENC1, SKP2, POLR1B, PPP1CB, CTSV, NRIP1, RAD51, RSL1D1, SPATS2L, SRP72, WDR43, TNFAIP1, ARL4A, MIDN, MTDH, NEK2, NOC3L, SNRPB2, TSPYL1, NOM1, EZR, TCERG1, USP36, ARNTL2, GTF3C3, HSPA9, NMD3, UTP23, MYO1C, MKI67, SMAD7, FXR1, NEDD1, SRSF5, WDR3, ABL1, RCN2
CC	GO:0005783	endoplasmic reticulum	63	7.25806	5.76e-05	CLDN8, CAST, VAPA, ALG1, RNF185, PEX3, SLC35A2, SSR1, OGN, RNF103, DNAJB11, ELOVL5, PLOD2, ANK3, INSIG1, SRD5A3, ASPH, SAR1B, AGPAT3, SEC23A, STC2, GOLT1B, CCDC47, STIM1, CHP1, KTN1, MAN1A1, METTL7A, LPCAT2, LPCAT4, SRPK1, KIF1C, PSEN1, RRAS2, SRP72, EIF2AK3, MTDH, ADPGK, RSAD2, STAU1, FMO5, SET, A1CF, TMEM33, SLC30A1, BCL2, PTN, MEST, PLP2, AIMP1, TMBIM6, GIMAP8, MTTP, MSRB3, EI24, PLEKHF2, PTP4…
CC	GO:0005789	endoplasmic reticulum membrane	69	7.94931	4.58e-06	RFT1, CYP2J2, VAPA, ALG1, SGPP1, ORMDL1, RNF185, SSR1, CDC42, RNF103, ELOVL5, SLC35D1, PLOD2, XYLT1, INSIG1, SRD5A3, VMA21, TGFA, MGLL, ASPH, SAR1B, AGPAT3, KDELR3, SEC23A, EVA1A, SGK1, PLD1, UBE2J1, KTN1, STIM1, CYB5A, LPCAT2, LPCAT4, AADAC, UGT2B17, PSEN1, SORT1, EIF2AK3, DST, MTDH, HSD17B12, NR3C2, RSAD2, ANKS4B, FMO5, TMED4, STT3A, TMEM33, SHISA3, BCL2, NUP210, ACSL4, MEST, PLP2, FADS1, TMBIM…
CC	GO:0016020	membrane	159	18.318	9.02e-10	CAST, GNA13, XPO1, CHERP, PPP2R5A, IL6ST, PRR11, NAA15, TTK, LUZP1, SYT7, IL17RB, PNN, ATP2B1, NONO, PRIM1, ATP2B4, FAM49B, SLC2A4, DNAJB11, ELOVL5, ASPH, INSR, PLD1, GOLT1B, MTA2, LRRC1, METTL7A, HNRNPU, GLTP, LPCAT4, MARK2, NCAPD2, RSL1D1, MGAT3, NNT, ATP2C1, ASCC3, VSNL1, PDGFRA, PDCD6IP, GBP3, EIF2AK3, FGFR2, KIF4A, ME2, SNX1, SFXN1, ARF6, SNX4, CAPZB, SLC11A2, KIAA2013, STX12, ECE1, DOCK1, B…
CC	GO:0070062	extracellular exosome	173	19.9309	8.99e-06	PVR, GNA13, GDA, ATP1B3, THRB, IL6ST, PITPNA, IQGAP2, LUZP1, ENPEP, SYT7, PNP, CD2AP, CMBL, ATP2B1, CD47, PRKAR2B, OGN, GHITM, FAM49B, CD44, SLC2A4, PLOD2, PLS1, RALB, CTDSP1, ENOPH1, PRKACB, CAB39, PDGFD, SLC4A4, INSR, RAB27A, GNG7, PTPRJ, BAIAP2, CHP1, METTL7A, PPP1CB, GLTP, PGM2, TRIM36, PGM1, RAB14, RAB15, PDCD6IP, MGAT5, ZNHIT6, DST, SNX9, GGCT, ARF6, GIPC2, ACP1, CAPZB, CHMP2B, ALCAM, PLAA,…
CC	GO:0005654	nucleoplasm	194	22.3502	1.42e-10	SURF6, CMTR1, SART3, PRIM1, NONO, CDCA8, CDCA7, PATZ1, SAP30L, OGT, RRP7A, SKP2, HNF4G, OPTN, TOX4, PPARGC1A, NCAPD2, RAD1, RFC3, ASCC3, PRDM1, ANAPC7, NEK6, FUS, KIF4A, ZCRB1, HNRNPA3, TCF20, POLM, ZNF74, KLF9, SMAD7, PHB, SMAD5, FNIP2, SRSF3, NOTCH3, SRSF2, SRSF5, SRSF7, SRSF6, ETS2, UBA2, PARPBP, NCOR1, SRSF1, PPARA, ZBTB33, TAF1D, U2SURP, SHOC2, PHF20, HSBP1, PTEN, USP10, GATAD1, TWISTNB, RBB…
CC	GO:0005829	cytosol	208	23.9631	1.67e-07	GDA, SYT7, AMOTL1, AMOTL2, PGPEP1, CDCA8, GAB1, STAM, PELI2, CAB39, OGT, KIF13B, BCL2L15, PAN3, SKP2, OPTN, GLTP, BCL2L11, NCAPD2, PGM2, PGM3, GRB10, PGM1, RAB14, ANAPC7, SRP72, NUP43, NEK6, KIF4A, GGCT, NEK2, UBA6, CAPZB, PPAT, GOLPH3L, SKA1, PABPC1, SMAD7, SMAD5, SPDL1, ACACB, TAX1BP3, ENGASE, NOTCH3, RPE, UBA2, RHEB, GK, AP1B1, GNPNAT1, WASF2, PHF20, PTEN, CKB, MCCC2, AASDHPPT, FXN, SEH1L, MRI…
CC	GO:0005737	cytoplasm	311	35.8295	4.58e-09	PVR, PPP2R5A, PITPNA, PRR11, DQX1, PDLIM3, NAA15, CMTR1, AMOTL1, SART3, MXI1, CD2AP, CITED2, CDCA7, CD44, RAVER2, PLS1, KIF13B, RRP7A, LRRC1, UBE2J1, SKP2, OPTN, GLTP, NCAPD2, GRB10, ASCC3, PGM1, PDGFRA, RAB15, STC1, SRP72, PRDM1, MCTS1, EIF2AK3, NEK6, KIF4A, NEK2, AKAP12, UBA6, CAPZB, ACP1, LIF, PLAA, SLC11A2, HNRNPA3, ARIH2, TMEM127, ARNTL2, PABPC1, MKI67, KLF9, SMAD7, PHB, TAOK3, SMAD5, TAX1BP…
MF	GO:0004896	cytokine receptor activity	7	0.806452	0.00625509	CD44, IL20RA, IL6ST, CSF2RB, IL6R, IFNLR1, IL17RB
MF	GO:0051287	NAD binding	8	0.921659	0.0017707	ME1, ME2, NNT, SORD, UGDH, BDH2, HPGD, IDH3A
MF	GO:0015171	amino acid transmembrane transporter activity	8	0.921659	0.00611768	SLC38A4, SLC7A1, SLC6A6, PEX3, SLC6A19, SLC43A1, SLC7A6, SLC7A11
MF	GO:0008013	beta-catenin binding	11	1.26728	0.00509578	PTPRJ, PSEN1, SMAD7, FOXO1, CDH1, TAX1BP3, AXIN2, FOXO4, CD2AP, TCF7L2, BCL9
MF	GO:0051015	actin filament binding	15	1.72811	0.00379088	SHROOM3, SHROOM4, IQGAP2, CAPZB, AJUBA, CORO2A, EZR, CFL2, SVIL, PLS1, WIPF2, MARCKS, WDR1, ABL1, LCP1
MF	GO:0008022	protein C-terminus binding	18	2.07373	0.00565521	BCL10, MYO1C, MKI67, BAIAP2, PHB, SYNJ2BP, OPTN, PFKM, TAX1BP3, SDCBP2, CD2AP, FOXN3, RAD51, PPP2CB, PABPC1, ABL1, KPNA3, DST
MF	GO:0000287	magnesium ion binding	23	2.64977	0.000261	IMPA1, PPM1A, HPRT1, STK4, PTEN, SRPK1, IDH3A, MARK2, MAST3, PGM2, PGM3, EYA2, AASDHPPT, PGM1, CDC42BPA, DYRK2, ENOPH1, PRKACB, ABL1, ITPK1, NEK6, ATP8A1, PRPS1
MF	GO:0031625	ubiquitin protein ligase binding	25	2.88018	0.0048139	BID, SNX9, UBE2G1, FOXO1, CKB, PRKAR2B, BCL2, PCBP2, RALB, PRKACB, AXIN2, HSPA9, TXNIP, BCL10, SMAD7, TMBIM6, SMAD5, UBE2J1, UBE2H, PRR5L, FZD5, PPARGC1A, GPI, CASP10, RAD18
MF	GO:0019899	enzyme binding	29	3.34101	0.00226551	THRB, CBX3, EGLN1, FOXO4, MCM10, PTEN, PDCD2, TSPYL1, BCHE, PCBP2, SCARB2, AXIN2, BCL10, STC2, TMBIM6, PHB, ANKMY2, SPDL1, CYB5A, IL6R, NOTCH3, NCOA1, HDAC2, PLSCR4, BTG1, TEP1, SORT1, ZNHIT6, EIF2AK3
MF	GO:0000166	nucleotide binding	37	4.26267	8.5e-06	SRSF1, FUS, RBM3, TRMT2A, U2SURP, SNRPB2, ZCRB1, HPRT1, SART3, TMEM63B, ATP2B1, HNRNPA3, NONO, AKAP17A, A1CF, RAVER2, TARDBP, TIA1, HNRNPF, RBM47, PABPC1, RBM26, RRP7A, SSB, ATP1A2, HNRNPDL, PPARGC1A, RAD51, SRSF3, SRSF2, SRSF5, LARP4, SRSF7, SRSF6, SFPQ, CPSF6, RBM17
MF	GO:0003723	RNA binding	43	4.95392	0.00132892	SRSF1, FUS, XPO1, NUP98, CHERP, AGFG1, SURF6, RBM3, U2SURP, RPL27A, ZCRB1, PDCD4, HNRNPA3, PATL1, FUBP3, NOM1, A1CF, HNRNPF, TIA1, TARDBP, PCBP2, ZNF74, PABPC1, RBM26, SAMD4B, CSTF3, RAD51AP1, NIP7, SSB, MBNL1, PPARGC1A, CAPRIN1, HNRNPU, FXR1, SRSF3, RSL1D1, SRSF5, SRSF6, ZRANB2, CPSF6, TEP1, TRUB1, RBM17
MF	GO:0042802	identical protein binding	51	5.87558	0.00825753	CLDN8, SEPHS1, IMPA1, GNPNAT1, CBX3, HSBP1, FOXO4, MCM10, SDCBP2, AMOTL1, AMOTL2, PTEN, NONO, CDC42, TARDBP, PHC2, MRI1, BCL10, BAIAP2, STXBP1, SKP2, STIM1, OPTN, PFKM, STK4, RAD51, SNRNP200, RAD18, MSANTD3, ZNHIT6, OAT, EIF2AK3, LCP1, PRPS1, NMNAT1, FUS, SORD, SNX1, DAZAP2, HPRT1, BCHE, BCL2, RPIA, CREBZF, CPT1A, FNBP1, RPE, DESI1, PLN, CDC42BPA, PDCD6
MF	GO:0044822	poly(A) RNA binding	101	11.6359	5.23e-10	CAST, MKRN1, RPL36A, FASTKD2, CHERP, SURF6, RBM3, TRMT2A, DQX1, NAA15, SART3, PNN, NONO, AKAP17A, MAK16, RAVER2, TARDBP, TIA1, ZNF579, SAMD4B, PAN3, RRP7A, HNRNPU, MARK2, RSL1D1, ASCC3, UBFD1, SNRPC, SRP72, FUS, HMGB3, STRAP, NOC3L, ZCRB1, HNRNPA3, TCF20, NOM1, TCERG1, HNRNPF, PABPC1, UTP23, CSTF3, MRPS23, MKI67, SSB, FXR1, SRSF3, R3HDM1, SRSF2, SRSF5, HDAC2, SRSF7, PTCD3, SRSF6, WDR3, GPATCH4, D…
MF	GO:0005515	protein binding	515	59.3318	1.75e-13	PDP1, SURF6, PPP2R5A, NAA15, MXI1, SART3, AMOTL1, AMOTL2, SSR1, TMEM140, CITED2, OGN, CDCA8, MALL, YEATS2, OGT, CAB39, RAB27A, PTPRJ, BCL2L15, SKP2, MED11, TOX4, BCL2L11, GLTP, MARK2, NCAPD2, RAD1, GRB10, ASCC3, ZNHIT6, MCTS1, EIF2AK3, KIF4A, PPP2R3A, HSD17B12, UBA6, ARF6, ACP1, ALCAM, ARIH2, GOLPH3L, PABPC1, MKI67, KLF13, PHB, KLF10, TAOK3, SPDL1, ACACB, LACTB2, FXR1, FNIP2, SRSF3, SRSF2, FNBP1,…
