# Supplementary material for: Expression profile, molecular functions, and prognostic significance of miRNAs in primary colorectal cancer stem cells
Source: Aging (Albany NY). 2021 Apr 1;13(8):12067–85. doi: 10.18632/aging.202914 (PMC8109135; doi:10.18632/aging.202914)
Supplement: Supplementary Table 8 [file aging-13-202914-s009.xlsx]

## Sheet: Sheet1
Supplementary Table 8. List of TCGA IDs for randomly grouped training and validation cohort.
id in Training cohort	id in validation cohort
TCGA-AA-3973-01	TCGA-A6-6652-01
TCGA-G4-6302-01	TCGA-AA-3870-01
TCGA-AF-3400-01	TCGA-F4-6704-01
TCGA-F5-6864-01	TCGA-F5-6464-01
TCGA-F5-6813-01	TCGA-CM-6167-01
TCGA-DC-6156-01	TCGA-AA-A01P-01
TCGA-A6-6651-01	TCGA-AA-3866-01
TCGA-A6-3808-01	TCGA-DM-A280-01
TCGA-A6-A566-01	TCGA-AF-2687-01
TCGA-EI-7004-01	TCGA-AA-3489-01
TCGA-A6-2681-01	TCGA-AG-A016-01
TCGA-CM-6679-01	TCGA-AZ-4616-01
TCGA-AF-2690-01	TCGA-AG-4021-01
TCGA-AD-6901-01	TCGA-CM-6674-01
TCGA-AZ-4615-01	TCGA-F5-6811-01
TCGA-EI-6514-01	TCGA-AY-4070-01
TCGA-F5-6812-01	TCGA-A6-6142-01
TCGA-AZ-4308-01	TCGA-G4-6299-01
TCGA-F5-6863-01	TCGA-AA-3952-01
TCGA-DY-A1DF-01	TCGA-AG-A00C-01
TCGA-A6-2682-01	TCGA-A6-2685-01
TCGA-G4-6627-01	TCGA-AF-2691-01
TCGA-A6-6654-01	TCGA-AG-3901-01
TCGA-AD-6899-01	TCGA-AG-4008-01
TCGA-AZ-4323-01	TCGA-AA-3975-01
TCGA-F4-6807-01	TCGA-D5-6541-01
TCGA-F4-6460-01	TCGA-AA-A024-01
TCGA-AA-A01F-01	TCGA-CM-6677-01
TCGA-F4-6703-01	TCGA-AA-A02R-01
TCGA-AG-3582-01	TCGA-F5-6571-01
TCGA-G4-6315-01	TCGA-DT-5265-01
TCGA-DC-6154-01	TCGA-CM-4747-01
TCGA-AG-3894-01	TCGA-AA-A02H-01
TCGA-CM-5861-01	TCGA-CK-6748-01
TCGA-CL-5918-01	TCGA-CM-5348-01
TCGA-AG-A036-01	TCGA-AA-3833-01
TCGA-CA-6717-01	TCGA-AG-3584-01
TCGA-AA-A01T-01	TCGA-EI-6883-01
TCGA-AH-6547-01	TCGA-G4-6298-01
TCGA-F4-6809-01	TCGA-D5-6930-01
TCGA-A6-6141-01	TCGA-AZ-5403-01
TCGA-AA-3970-01	TCGA-AA-A02J-01
TCGA-AF-2692-01	TCGA-AG-4005-01
TCGA-AA-3956-01	TCGA-AA-3867-01
TCGA-A6-5657-01	TCGA-A6-4107-01
TCGA-AG-3878-01	TCGA-CA-6719-01
TCGA-AA-A00D-01	TCGA-A6-A567-01
TCGA-AG-A011-01	TCGA-CM-5868-01
TCGA-DC-6157-01	TCGA-F5-6861-01
TCGA-AD-A5EK-01	TCGA-F5-6702-01
TCGA-AG-3609-01	TCGA-AG-4007-01
TCGA-AZ-6605-01	TCGA-A6-A5ZU-01
TCGA-F4-6855-01	TCGA-AA-3994-01
TCGA-F4-6570-01	TCGA-AA-3982-01
TCGA-SS-A7HO-01	TCGA-EI-6884-01
TCGA-G4-6303-01	TCGA-DM-A285-01
TCGA-D5-6932-01	TCGA-3L-AA1B-01
TCGA-DY-A0XA-01	TCGA-AA-A02E-01
TCGA-NH-A50U-01	TCGA-CM-6164-01
TCGA-AA-A02F-01	TCGA-AG-3893-01
TCGA-AF-A56K-01	TCGA-DC-6681-01
TCGA-EF-5830-01	TCGA-CM-6675-01
TCGA-AA-A029-01	TCGA-DY-A1DE-01
TCGA-AA-A01X-01	TCGA-5M-AAT6-01
TCGA-EI-7002-01	TCGA-AG-3575-01
TCGA-D5-5538-01	TCGA-AZ-4684-01
TCGA-F4-6854-01	TCGA-F5-6814-01
TCGA-A6-5667-01	TCGA-CA-5254-01
TCGA-D5-6898-01	TCGA-CM-5341-01
TCGA-AA-A02O-01	TCGA-AG-3593-01
TCGA-AZ-4614-01	TCGA-CM-6680-01
TCGA-CA-5256-01	TCGA-D5-6929-01
TCGA-CM-4750-01	TCGA-AY-4071-01
TCGA-CM-5860-01	TCGA-A6-5662-01
TCGA-F4-6806-01	TCGA-F4-6459-01
TCGA-EI-6917-01	TCGA-CM-6678-01
TCGA-AG-3882-01	TCGA-F4-6569-01
TCGA-A6-A565-01	TCGA-EI-6885-01
TCGA-AG-A01N-01	TCGA-D5-6922-01
TCGA-AG-4022-01	TCGA-AA-3495-01
TCGA-A6-6782-01	TCGA-AA-A01D-01
TCGA-AG-3890-01	TCGA-AG-3885-01
TCGA-AA-3812-01	TCGA-AZ-4682-01
TCGA-DY-A1DC-01	TCGA-EI-6511-01
TCGA-AD-6964-01	TCGA-A6-2686-01
TCGA-AG-3728-01	TCGA-AA-3980-01
TCGA-CM-5863-01	TCGA-CM-5349-01
TCGA-QG-A5YV-01	TCGA-AA-3976-01
TCGA-A6-2683-01	TCGA-CA-5797-01
TCGA-F4-6808-01	TCGA-AG-4001-01
TCGA-G4-6317-01	TCGA-AA-3968-01
TCGA-A6-3807-01	TCGA-A6-2671-01
TCGA-AG-A026-01	TCGA-AA-3818-01
TCGA-AF-6136-01	TCGA-AG-A002-01
TCGA-D5-6926-01	TCGA-CM-4752-01
TCGA-AF-A56N-01	TCGA-CM-6166-01
TCGA-NH-A8F8-01	TCGA-CM-6170-01
TCGA-QG-A5Z1-01	TCGA-AZ-6599-01
TCGA-AG-3999-01	TCGA-CA-6715-01
TCGA-DY-A1DD-01	TCGA-AY-A54L-01
TCGA-AG-3902-01	TCGA-CM-5864-01
TCGA-AZ-6607-01	TCGA-AA-3811-01
TCGA-AG-3898-01	TCGA-F4-6461-01
TCGA-DM-A28H-01	TCGA-AA-3861-01
TCGA-CM-4748-01	TCGA-DC-6683-01
TCGA-CI-6624-01	TCGA-A6-A56B-01
TCGA-CA-5255-01	TCGA-DC-6682-01
TCGA-AA-3519-01	TCGA-DM-A1D8-01
TCGA-G4-6322-01	TCGA-NH-A6GC-01
TCGA-CM-5344-01	TCGA-AA-3837-01
TCGA-AH-6544-01	TCGA-DM-A28C-01
TCGA-QG-A5YW-01	TCGA-AA-A010-01
TCGA-AG-3896-01	TCGA-D5-5541-01
TCGA-D5-6532-01	TCGA-DC-5869-01
TCGA-D5-6534-01	TCGA-AF-4110-01
TCGA-AA-3548-01	TCGA-AA-3854-01
TCGA-AA-3561-01	TCGA-AZ-6603-01
TCGA-4N-A93T-01	TCGA-NH-A50V-01
TCGA-AG-3881-01	TCGA-CM-6169-01
TCGA-AA-3971-01	TCGA-AA-A00U-01
TCGA-AA-A00W-01	TCGA-DM-A0XF-01
TCGA-EF-5831-01	TCGA-AG-3574-01
TCGA-D5-6535-01	TCGA-A6-6138-01
TCGA-DM-A1D6-01	TCGA-AG-3592-01
TCGA-DY-A1DG-01	TCGA-CM-6676-01
TCGA-AG-A015-01	TCGA-D5-6931-01
TCGA-CM-4751-01	TCGA-AG-3725-01
TCGA-DM-A28E-01	TCGA-AG-3586-01
TCGA-G4-6311-01	TCGA-AA-A02K-01
TCGA-DM-A1HA-01	TCGA-RU-A8FL-01
TCGA-AA-A01V-01	TCGA-D5-5539-01
TCGA-CK-5916-01	TCGA-AA-3844-01
TCGA-AG-3581-01	TCGA-DM-A28F-01
TCGA-DM-A1DA-01	TCGA-AA-3667-01
TCGA-CM-4746-01	TCGA-AA-3989-01
TCGA-AA-3679-01	TCGA-DM-A28G-01
TCGA-AA-A00O-01	TCGA-AG-3731-01
TCGA-AA-3986-01	TCGA-DC-5337-01
TCGA-CK-4951-01	TCGA-AA-A01G-01
TCGA-AG-3598-01	TCGA-AG-3608-01
TCGA-DM-A282-01	TCGA-5M-AATE-01
TCGA-A6-6649-01	TCGA-AG-3599-01
TCGA-QG-A5Z2-01	TCGA-A6-2675-01
TCGA-AA-3514-01	TCGA-NH-A8F7-01
TCGA-AG-3591-01	TCGA-5M-AAT4-01
TCGA-G4-6304-01	TCGA-DC-6158-01
TCGA-CM-5862-01	TCGA-D5-5537-01
TCGA-F5-6465-01	TCGA-D5-6924-01
TCGA-AG-3600-01	TCGA-AH-6903-01
TCGA-AG-3605-01	TCGA-AA-3966-01
TCGA-CM-6163-01	TCGA-DM-A1D4-01
TCGA-AA-3831-01	TCGA-AH-6643-01
TCGA-A6-5664-01	TCGA-CA-6718-01
TCGA-DM-A1HB-01	TCGA-AD-6888-01
TCGA-G4-6294-01	TCGA-AF-A56L-01
TCGA-G4-6320-01	TCGA-D5-6538-01
TCGA-DM-A288-01	TCGA-G5-6641-01
TCGA-A6-2676-01	TCGA-AA-A03F-01
TCGA-EI-6881-01	TCGA-AA-A03J-01
TCGA-AA-3947-01	TCGA-AD-6889-01
TCGA-G4-6321-01	TCGA-AD-6895-01
TCGA-DC-4745-01	TCGA-EI-6507-01
TCGA-AA-3538-01	TCGA-AA-3552-01
TCGA-CM-6168-01	TCGA-AA-3509-01
TCGA-CM-6165-01	TCGA-AG-3883-01
TCGA-DM-A28A-01	TCGA-CA-6716-01
TCGA-CI-6620-01	TCGA-AG-3583-01
TCGA-CA-5796-01	TCGA-AA-3517-01
TCGA-CM-6162-01	TCGA-AA-3549-01
TCGA-AA-3949-01	TCGA-AA-3520-01
TCGA-AA-3846-01	TCGA-AA-A00L-01
TCGA-AZ-6598-01	TCGA-D5-6923-01
TCGA-AG-3909-01	TCGA-F4-6463-01
TCGA-AY-A8YK-01	TCGA-CK-4948-01
TCGA-AA-3502-01	TCGA-AA-3858-01
TCGA-D5-5540-01	TCGA-AA-3692-01
TCGA-AA-A00J-01	TCGA-DM-A28K-01
TCGA-AA-A01R-01	TCGA-G4-6626-01
TCGA-AG-3887-01	TCGA-AF-2693-01
TCGA-D5-6536-01	TCGA-AG-A008-01
TCGA-AF-6655-01	TCGA-DC-6155-01
TCGA-AA-3877-01	TCGA-CI-6623-01
TCGA-AG-3727-01	TCGA-A6-2678-01
TCGA-F4-6856-01	TCGA-AA-3710-01
TCGA-AM-5820-01	TCGA-AA-3979-01
TCGA-G4-6293-01	TCGA-D5-6928-01
TCGA-AA-3660-01	TCGA-A6-2680-01
TCGA-AG-3742-01	TCGA-AG-3578-01
TCGA-A6-5660-01	TCGA-AA-3842-01
TCGA-CI-6619-01	TCGA-AA-3869-01
TCGA-A6-5666-01	TCGA-AH-6644-01
TCGA-EI-6509-01	TCGA-G4-6307-01
TCGA-AA-3678-01	TCGA-AG-3726-01
TCGA-EI-6882-01	TCGA-NH-A6GA-01
TCGA-CM-6161-01	TCGA-AM-5821-01
TCGA-AF-3911-01	TCGA-AG-3892-01
TCGA-G4-6297-01	TCGA-AH-6897-01
TCGA-AA-3526-01	TCGA-AA-3856-01
TCGA-D5-6533-01	TCGA-AZ-4315-01
TCGA-CI-6621-01	TCGA-EI-6508-01
TCGA-AF-6672-01	TCGA-AU-6004-01
TCGA-AA-3492-01	TCGA-AY-A71X-01
TCGA-AZ-4313-01	TCGA-AG-3580-01
TCGA-AA-A01Z-01	TCGA-AD-5900-01
TCGA-AA-3560-01	TCGA-AA-3531-01
TCGA-AA-3688-01	TCGA-AA-3685-01
TCGA-AA-3930-01	TCGA-EI-6506-01
TCGA-AD-6548-01	TCGA-CK-4947-01
TCGA-AZ-6606-01	TCGA-AA-3494-01
TCGA-AA-3851-01	TCGA-AA-3553-01
TCGA-AG-A02G-01	TCGA-AG-3587-01
TCGA-DM-A0X9-01	TCGA-NH-A5IV-01
TCGA-F4-6805-01	TCGA-AA-3848-01
TCGA-D5-6920-01	TCGA-4T-AA8H-01
TCGA-A6-2679-01	TCGA-AY-5543-01
TCGA-AA-3506-01	TCGA-DM-A1D0-01
TCGA-AA-3488-01	TCGA-AA-3496-01
TCGA-AA-3511-01	TCGA-AG-3732-01
TCGA-AA-3855-01	TCGA-DY-A1H8-01
TCGA-AA-3522-01	TCGA-AG-A02X-01
TCGA-G4-6323-01	TCGA-DC-4749-01
TCGA-AA-3525-01	TCGA-AG-A02N-01
TCGA-D5-6530-01	TCGA-AA-3696-01
TCGA-A6-5661-01	TCGA-AA-3555-01
TCGA-AA-3950-01	TCGA-T9-A92H-01
TCGA-AY-6386-01	TCGA-DM-A28M-01
TCGA-AD-6963-01	TCGA-A6-6137-01
TCGA-CK-6751-01	TCGA-AA-A02Y-01
TCGA-QL-A97D-01	TCGA-AA-A01S-01
TCGA-EI-6510-01	TCGA-AG-A020-01
TCGA-D5-6529-01	TCGA-QG-A5YX-01
TCGA-CI-6622-01	TCGA-A6-4105-01
TCGA-AD-6965-01	TCGA-AZ-5407-01
TCGA-D5-7000-01	TCGA-CK-4950-01
TCGA-CM-6172-01	TCGA-AH-6549-01
TCGA-AA-3663-01	TCGA-AA-3819-01
TCGA-DM-A0XD-01	TCGA-G4-6586-01
TCGA-AD-6890-01	TCGA-AA-3542-01
TCGA-AZ-4681-01	TCGA-G4-6309-01
TCGA-G4-6306-01	TCGA-AA-3655-01
TCGA-A6-6653-01	TCGA-NH-A6GB-01
TCGA-AA-3673-01	TCGA-CK-5912-01
TCGA-D5-6537-01	TCGA-CK-6747-01
TCGA-DM-A1D9-01	TCGA-AA-3543-01
TCGA-AA-3713-01	TCGA-CL-5917-01
TCGA-D5-6531-01	TCGA-CM-4744-01
TCGA-D5-6540-01	TCGA-AA-3534-01
TCGA-AY-6197-01	TCGA-AA-3666-01
TCGA-AA-3510-01	TCGA-DM-A1D7-01
TCGA-AA-3532-01	TCGA-AA-3680-01
TCGA-AA-3664-01	TCGA-A6-2672-01
TCGA-EI-6513-01	TCGA-A6-6140-01
TCGA-CM-4743-01	TCGA-A6-6648-01
TCGA-CM-6171-01	TCGA-AY-A69D-01
TCGA-DM-A1DB-01	TCGA-AA-3518-01
TCGA-AA-3864-01	TCGA-G4-6628-01
TCGA-A6-5665-01	TCGA-G4-6588-01
TCGA-AA-3875-01	TCGA-NH-A50T-01
TCGA-WS-AB45-01	TCGA-D5-6539-01
TCGA-AG-3594-01	TCGA-AA-3524-01
TCGA-CK-5914-01	TCGA-AF-5654-01
TCGA-EI-6512-01	TCGA-AA-3939-01
TCGA-AA-3681-01	TCGA-CK-5913-01
TCGA-CK-4952-01	TCGA-AA-3862-01
TCGA-AA-3715-01	TCGA-G4-6295-01
TCGA-AA-3821-01	TCGA-DC-6160-01
